# Supplementary material for: A multi-faceted approach to probe organic phase composition in TODGA systems with 1-alcohol phase modifiers
Source: Royal Society of Chemistry journal article supplement (doi:10.1039/d2ra07786h), 2023-01-01
Supplement: d2ra07786h1.pdf [file d2ra07786h1.pdf]

# A multi-faceted approach to probe organic phase composition in TODGA systems with 1-alcohol phase modifiers

## Supplemental Information

Allison A. Peroutka <sup>a</sup>, Shane S. Galley <sup>a</sup>, Jenifer C. Shafer <sup>a</sup>

|                                                   |           |
|---------------------------------------------------|-----------|
| <b>Solvent Extraction .....</b>                   | <b>2</b>  |
| <b>FT-IR Spectra .....</b>                        | <b>6</b>  |
| <i>Full Spectra .....</i>                         | <i>6</i>  |
| <i>Carbonyl Spectra.....</i>                      | <i>11</i> |
| Listed Frequencies .....                          | 11        |
| <i>Fitted Carbonyl Spectra Comparisons.....</i>   | <i>17</i> |
| <i>OriginLab Carbonyl Spectra Peak Fits .....</i> | <i>21</i> |
| No modifiers .....                                | 21        |
| 5 vol% 1-hexanol.....                             | 37        |
| 30 vol% 1-hexanol.....                            | 53        |
| 5 vol% 1-octanol .....                            | 69        |
| 10 vol% 1-octanol .....                           | 85        |
| 15 vol% 1-octanol .....                           | 101       |
| 30 vol% 1-octanol .....                           | 117       |
| 5 vol% 1-decanol.....                             | 133       |
| 30 vol% 1-decanol.....                            | 149       |
| 5 vol% 1-dodecanol.....                           | 165       |

## Solvent Extraction

Table S1. Separation Factors for Dy/Nd and Dy/Tb for 1-dodecanol

| vol% | SF             | 1-dodecanol  |
|------|----------------|--------------|
| 0    | Dy/Nd<br>Dy/Tb | 58.5<br>2.38 |
| 5    | Dy/Nd<br>Dy/Tb | 57.5<br>2.02 |
| 30   | Dy/Nd<br>Dy/Tb | -<br>-       |

Table S2. Ratio of 1-dodecanol molecules per extracted H<sub>2</sub>O Molecules

| vol% | 1-dodecanol |
|------|-------------|
| 5    | 18.58       |
| 30   | -           |



## Relation between TODGA, HNO<sub>3</sub>, and H<sub>2</sub>O

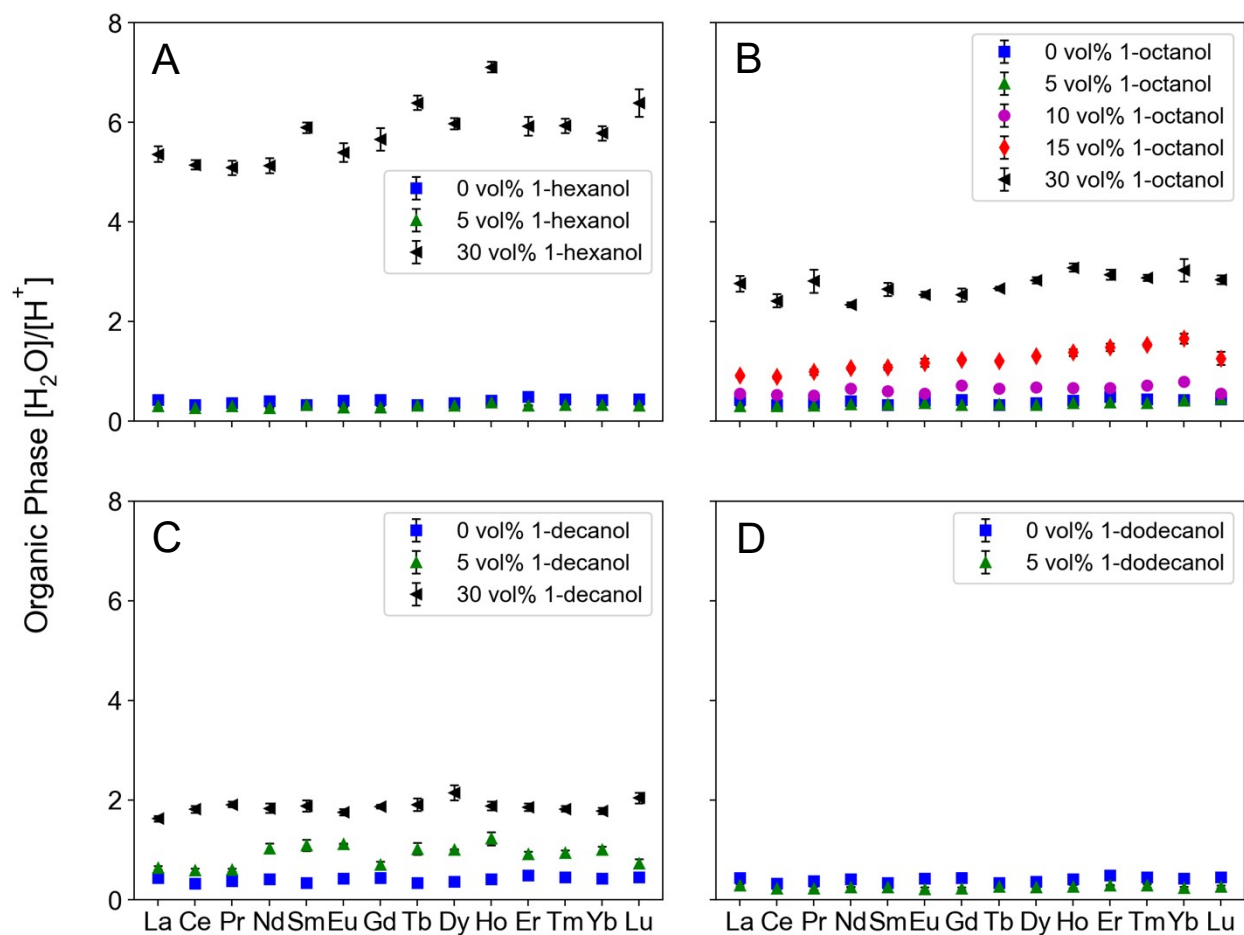

Figure S1. The ratio of co-extracted H<sub>2</sub>O molecules per H<sup>+</sup> cation, for all systems studied (A) 1-hexanol, (B) 1-octanol, (C) 1-decanol, and (D) 1-dodecanol.

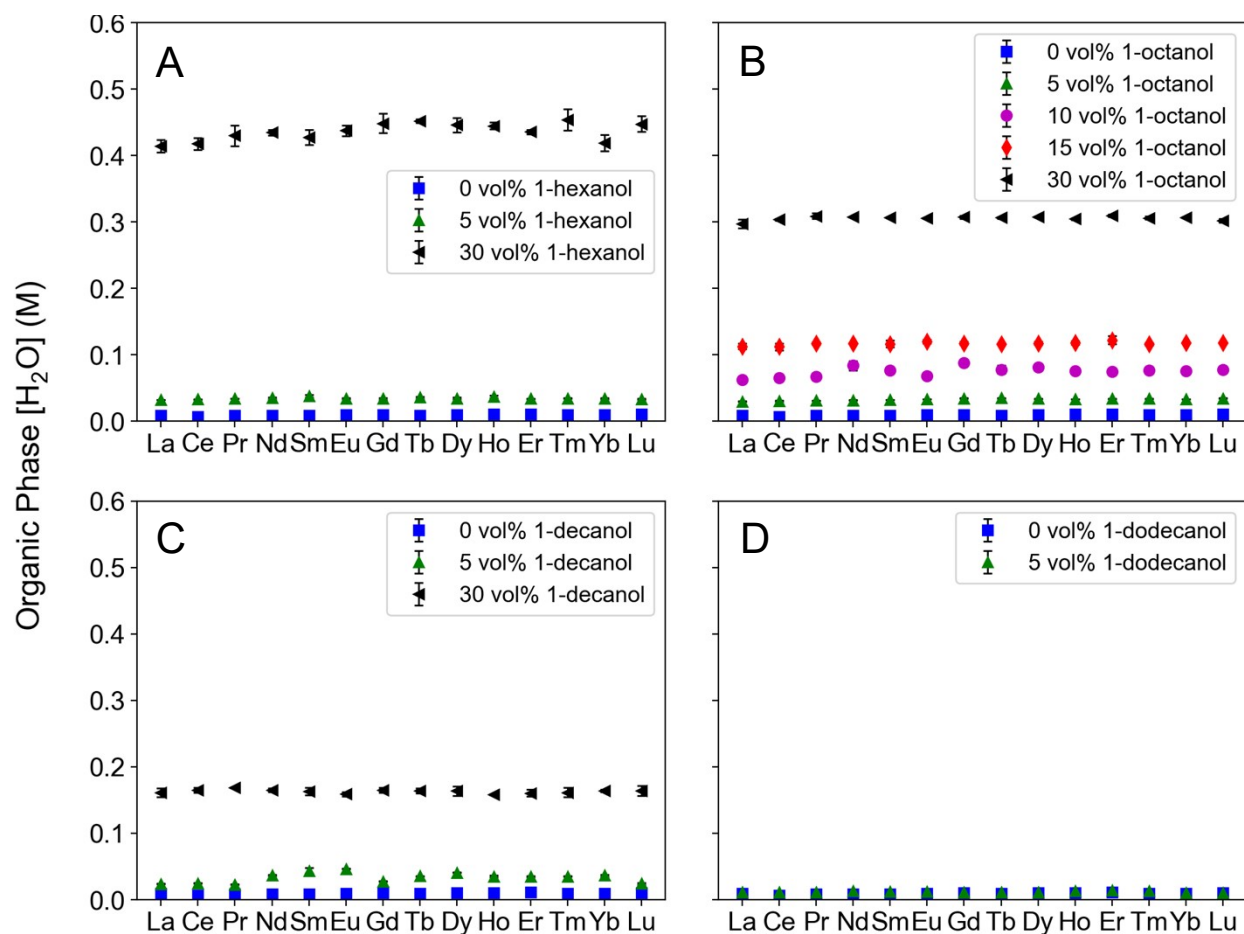

Figure S2. Organic phase  $\text{H}_2\text{O}$  concentration across the Ln period for systems containing (A) 0 vol%, 5 vol%, or 30 vol% 1-hexanol, (B) 0 vol%, 5 vol%, 10 vol%, 15 vol%, or 30 vol% 1-octanol, (C) 0 vol%, 5 vol%, or 30 vol% 1-decanol and (D) 0 vol% or 5 vol% 1-dodecanol. For each system tested, 0 vol% (blue, squares), 5 vol% (green triangles), 10 vol% (magenta circles), 15 vol% (red diamonds), and 30 vol% (black left-triangles). Error bars represent propagated uncertainty from preparing samples, instrument analysis, and sample standard deviation.

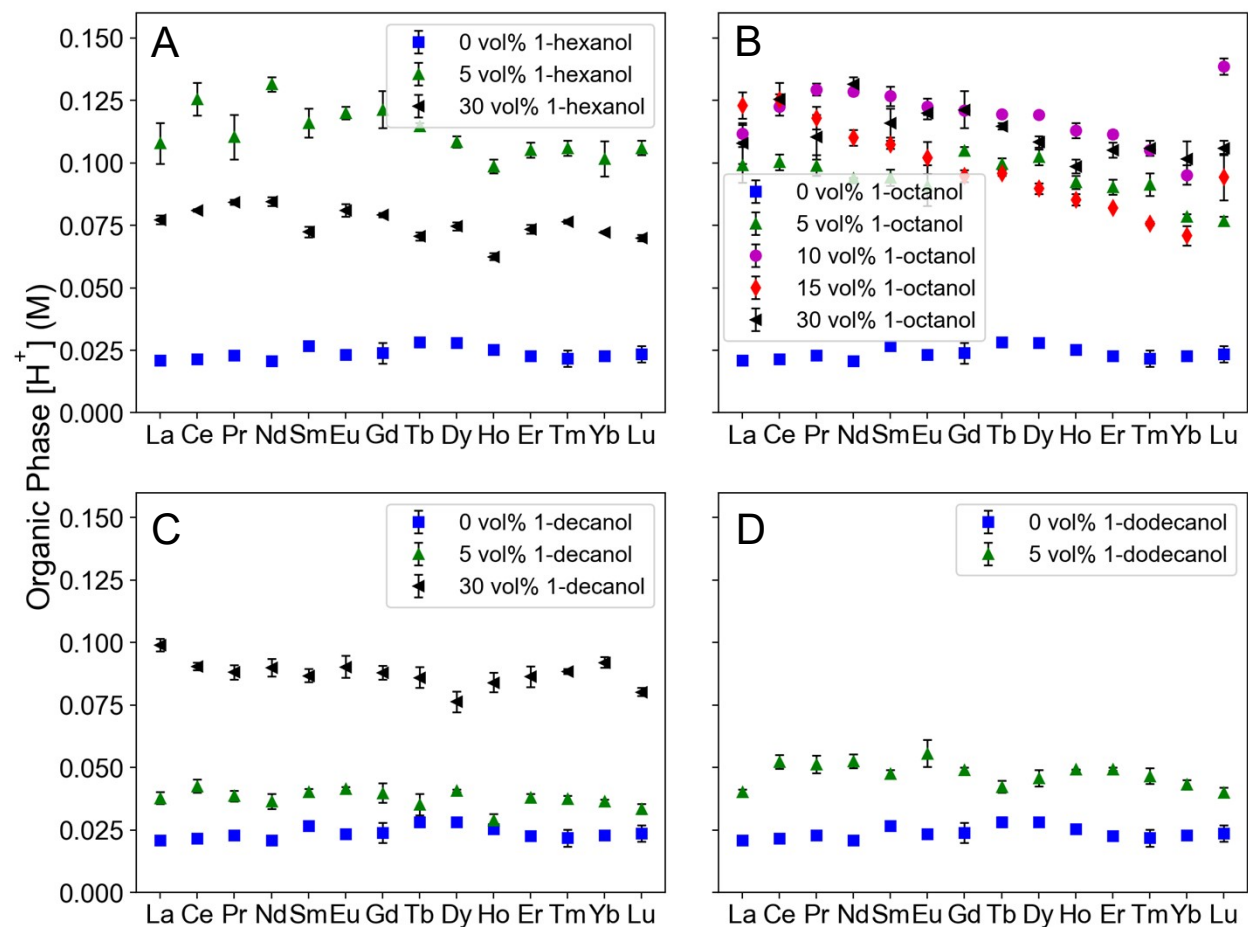

Figure S3. Organic phase  $H^+$  concentration across the Ln period for systems containing (A) 0 vol%, 5 vol%, or 30 vol% 1-hexanol, (B) 0 vol%, 5 vol%, 10 vol%, 15 vol%, or 30 vol% 1-octanol, (C) 0 vol%, 5 vol%, or 30 vol% 1-decanol and (D) 0 vol% or 5 vol% 1-dodecanol. For each system tested, 0 vol% (blue, squares), 5 vol% (green triangles), 10 vol% (magenta circles), 15 vol% (red diamonds), and 30 vol% (black left-triangles). Error bars represent propagated uncertainty from preparing samples, instrument analysis, and sample standard deviation.

## FT-IR Spectra

### Full Spectra

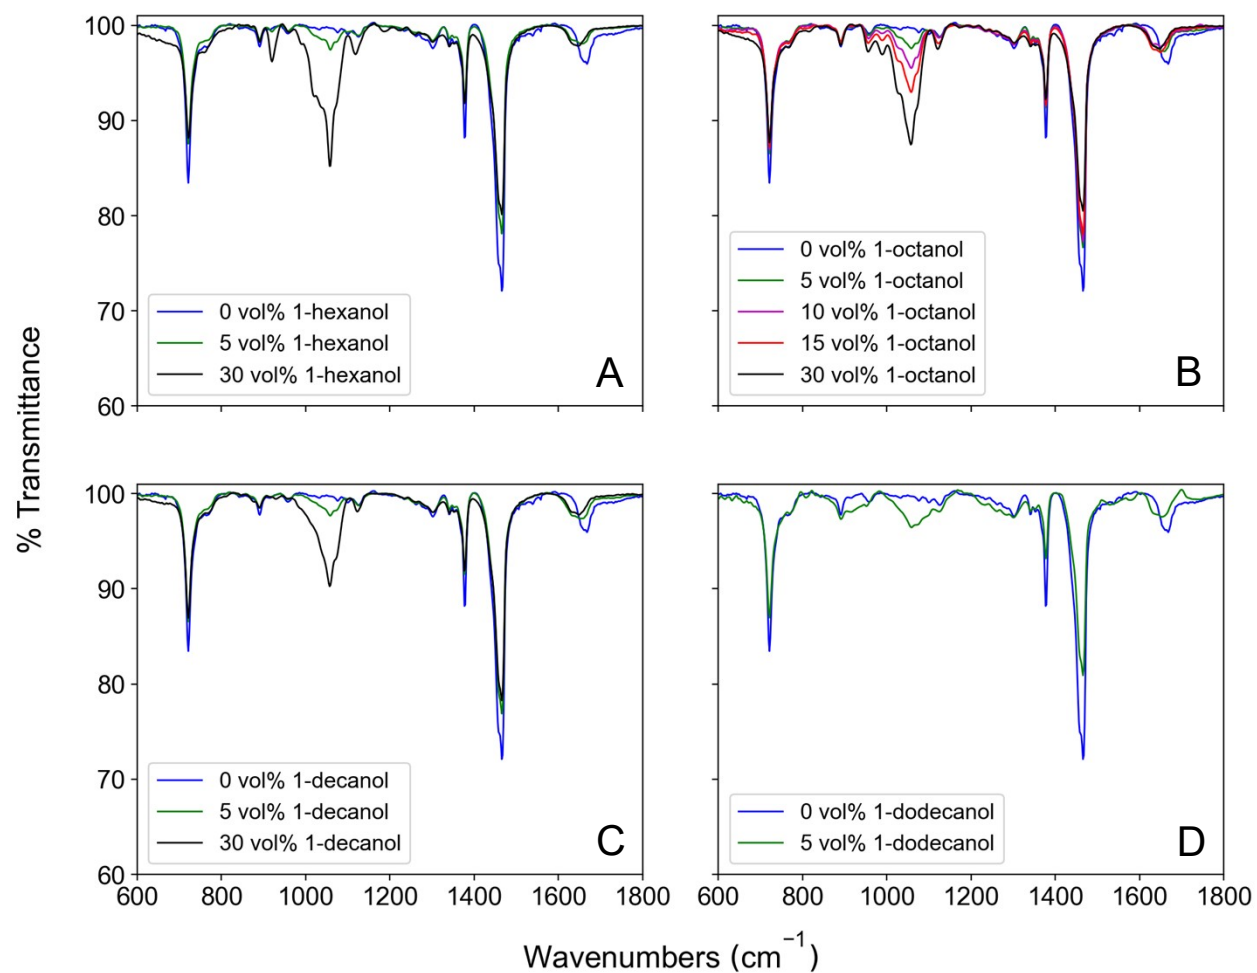

Figure S4. IR spectra of fresh organic phases, (A) 1-hexanol, (B) 1-octanol, (C) 1-decanol, (D) 1-dodecanol.

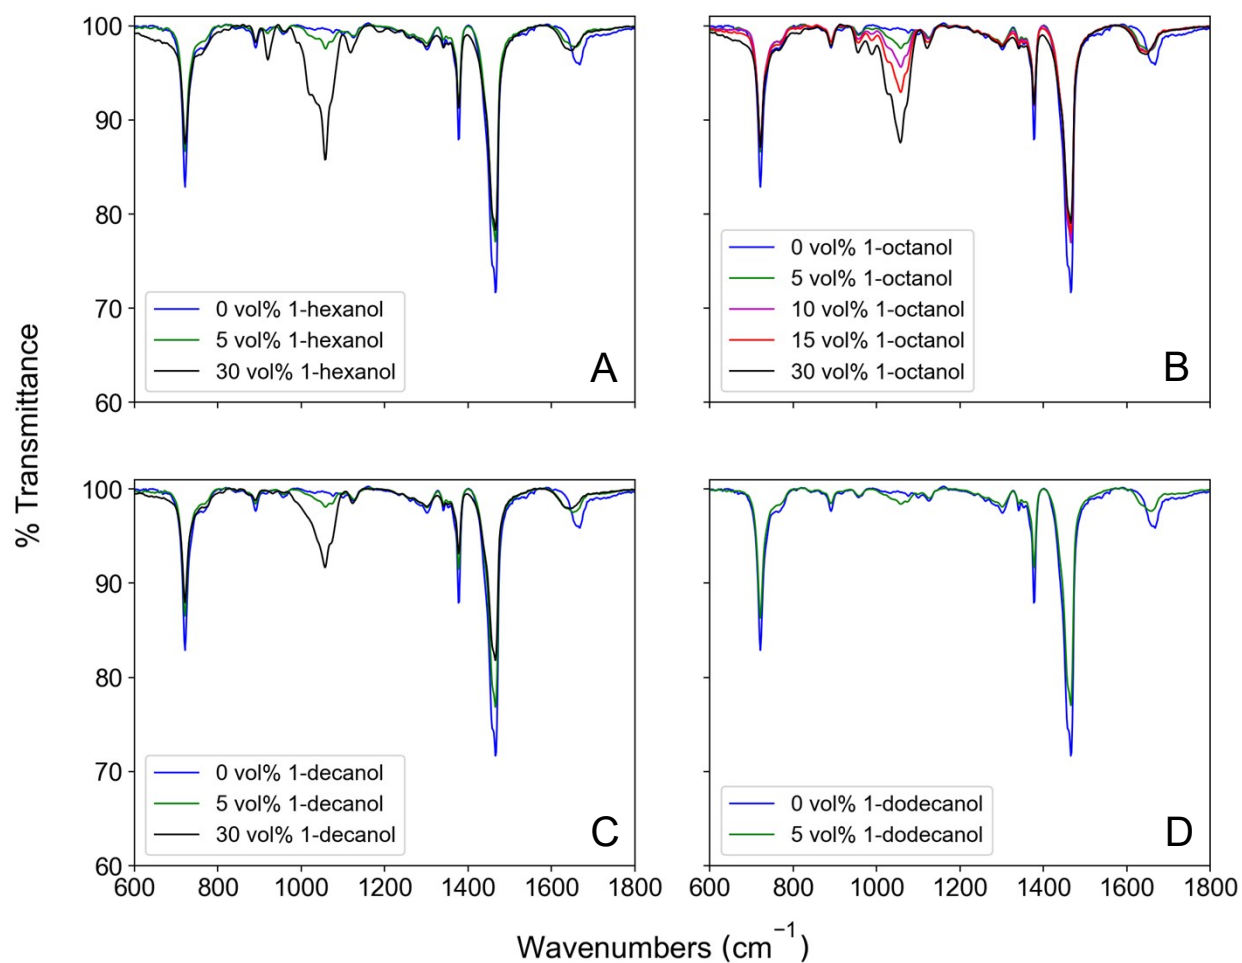

Figure S5. IR spectra of organic phases after contact with 1 M HNO<sub>3</sub>, (A) 1-hexanol, (B) 1-octanol, (C) 1-decanol, (D) 1-dodecanol.

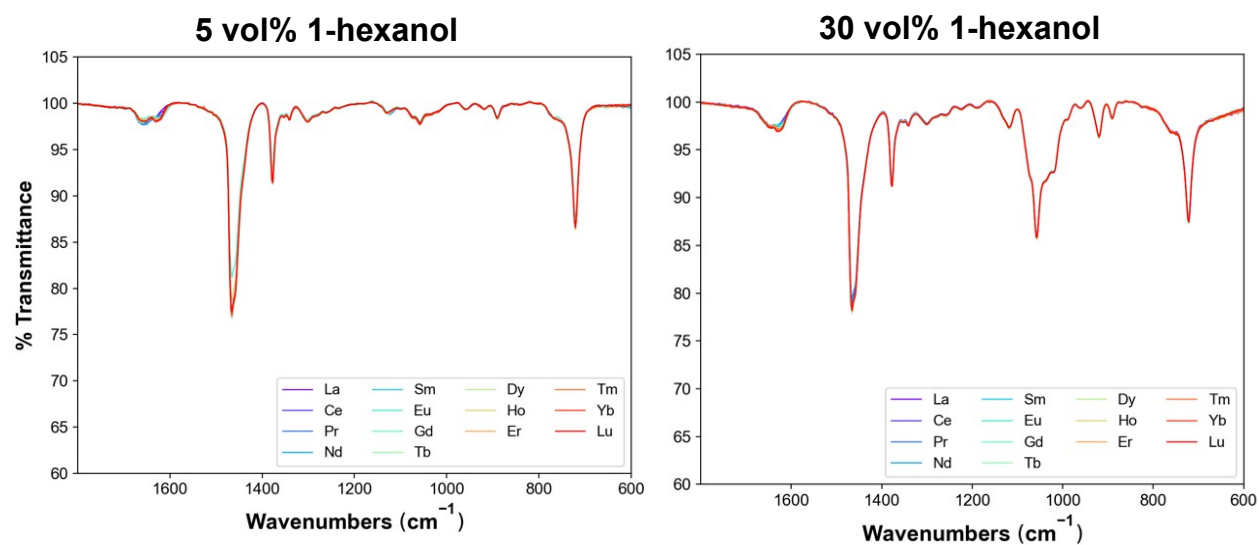

Figure S6. IR spectra of 1-hexanol containing organic phases following Ln contact. (left) organic phase containing 5 vol% 1-hexanol and (right) organic phase containing 30 vol% 1-hexanol.

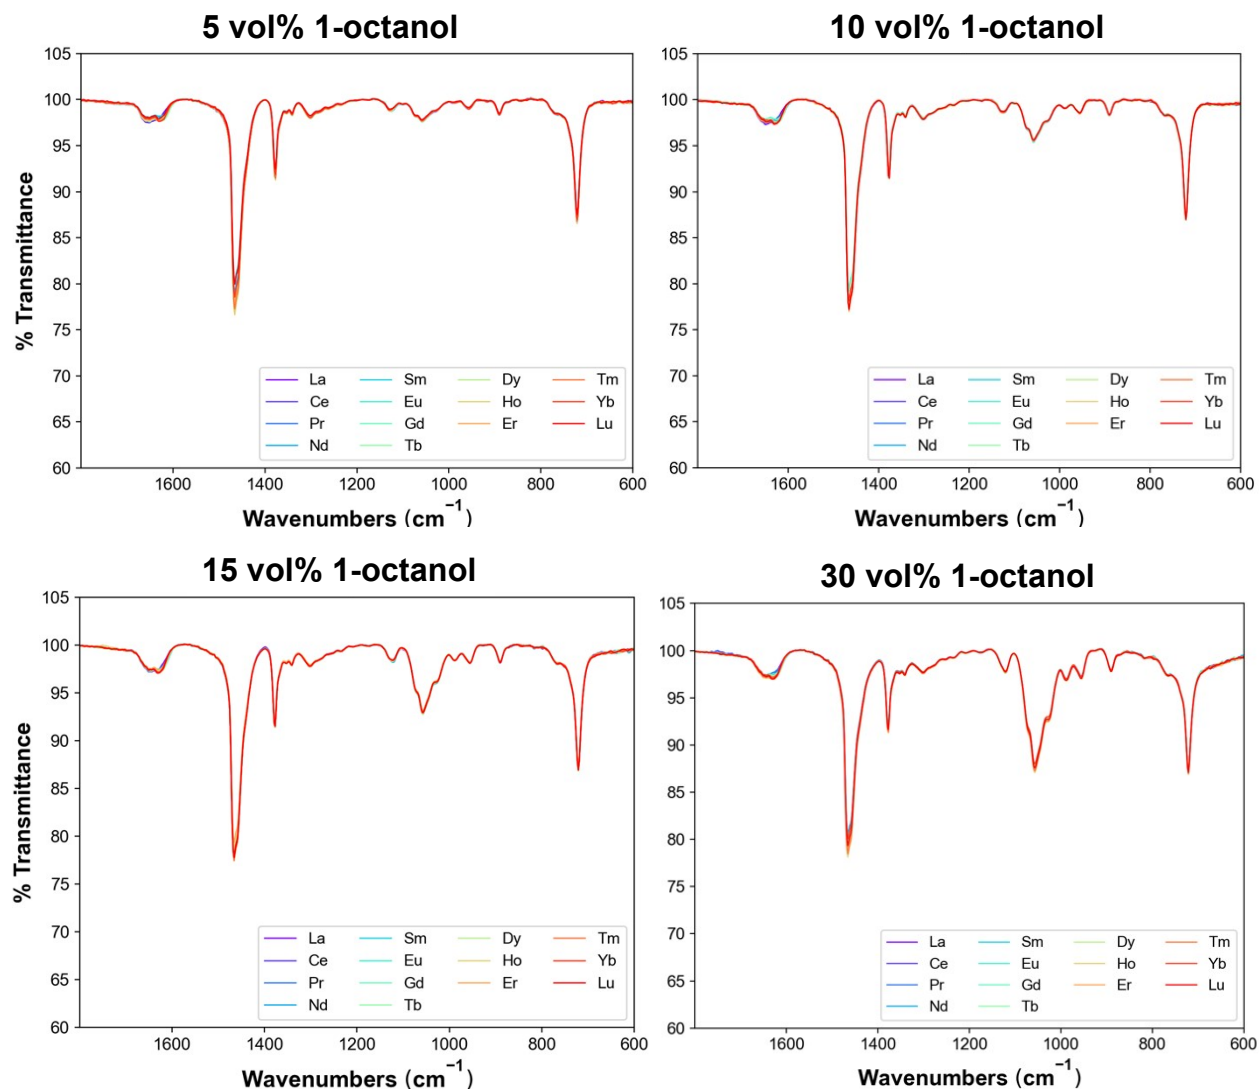

Figure S7. IR spectra of 1-octanol containing organic phases following Ln contact. Organic phases were containing (top left) 5 vol% 1-octanol, (top right) 10 vol% 1-octanol, (bottom left) 15 vol% 1-octanol, and (bottom right) 30 vol% 1-octanol.

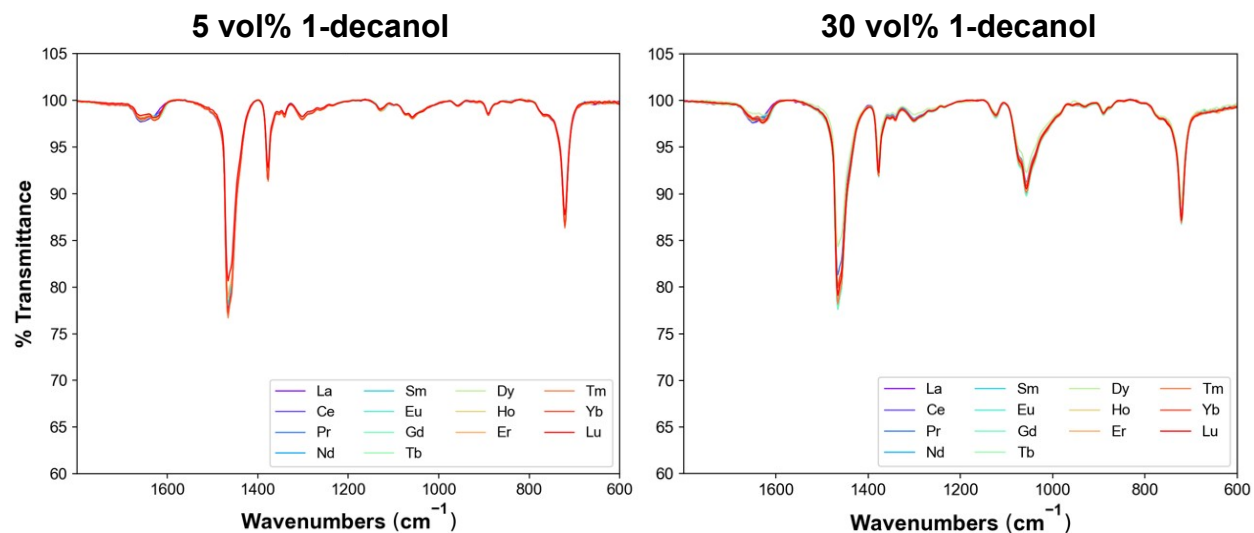

Figure S8. IR spectra of 1-decanol containing organic phases following Ln contact. Organic phases were containing (left) 5 vol% 1-decanol and (right) 30 vol% 1-decanol.

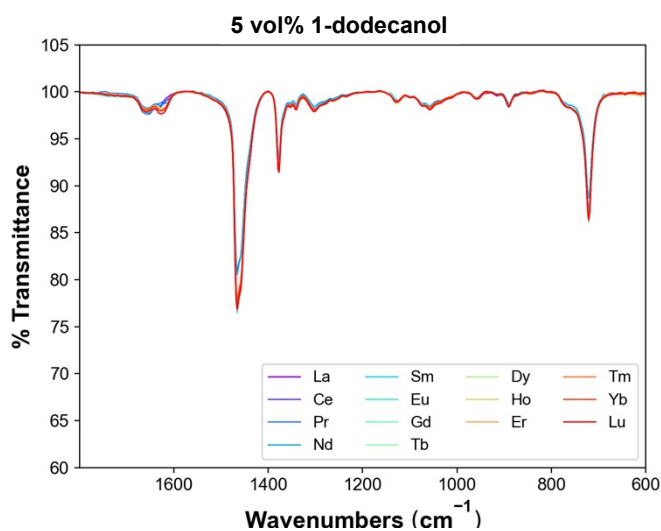

Figure S9. IR spectra of 1-dodecanol containing organic phases following Ln contact. Organic phases were containing 5 vol% 1- dodecanol.



## Carbonyl Spectra

### *Listed Frequencies*

Table S3. Frequencies of the carbonyl peaks(s) in the organic phase for the fresh organic phase (TODGA), after pre-equilibrium ( $\text{HNO}_3$ ), and after contact with each Ln.

| Sample         | 0 vol%<br>1-alcohol | 5 vol%<br>1-hexanol | 30 vol%<br>1-hexanol | 5 vol%<br>1-octanol | 30 vol%<br>1-octanol | 5 vol%<br>1-decanol | 30 vol%<br>1-decanol | 5 vol%<br>1-dodecanol |
|----------------|---------------------|---------------------|----------------------|---------------------|----------------------|---------------------|----------------------|-----------------------|
| TODGA          | 1662                | 1635/1661           | 1643                 | 1648                | 1639/1659            | 1640/1664           | 1629/1652            | 1650                  |
| $\text{HNO}_3$ | 1661/1670           | 1635/1660           | 1638/1660            | 1636/1660           | 1637/1658            | 1637/1662           | 1635/1657            | 1633/1659             |
| La             | 1645                | 1636                | 1630                 | 1605                | 1627                 | 1637                | 1628                 | 1637                  |
| Ce             | 1621                | 1634                | 1624                 | 1610                | 1625                 | 1617                | 1623                 | 1632                  |
| Pr             | 1618                | 1612                | 1625                 | 1618                | 1619                 | 1621                | 1622                 | 1631                  |
| Nd             | 1617                | 1623                | 1620                 | 1614                | 1619                 | 1612                | 1620                 | 1624                  |
| Sm             | 1615                | 1612                | 1614                 | 1623                | 1618                 | 1621                | 1620                 | 1622                  |
| Eu             | 1615                | 1623                | 1617                 | 1623                | 1619                 | 1622                | 1622                 | 1622                  |
| Gd             | 1616                | 1624                | 1620                 | 1622                | 1620                 | 1622                | 1624                 | 1623                  |
| Tb             | 1617                | 1624                | 1620                 | 1623                | 1620                 | 1621                | 1625                 | 1621                  |
| Dy             | 1617                | 1624                | 1620                 | 1625                | 1624                 | 1624                | 1617                 | 1622                  |
| Ho             | 1618                | 1624                | 1621                 | 1626                | 1623                 | 1624                | 1618                 | 1623                  |
| Er             | 1618                | 1625                | 1622                 | 1626                | 1624                 | 1625                | 1619                 | 1623                  |
| Tm             | 1619                | 1625                | 1622                 | 1625                | 1623                 | 1625                | 1621                 | 1625                  |
| Yb             | 1619                | 1626                | 1624                 | 1626                | 1623                 | 1625                | 1624                 | 1625                  |
| Lu             | 1620                | 1626                | 1623                 | 1627                | 1625                 | 1626                | 1622                 | 1624                  |

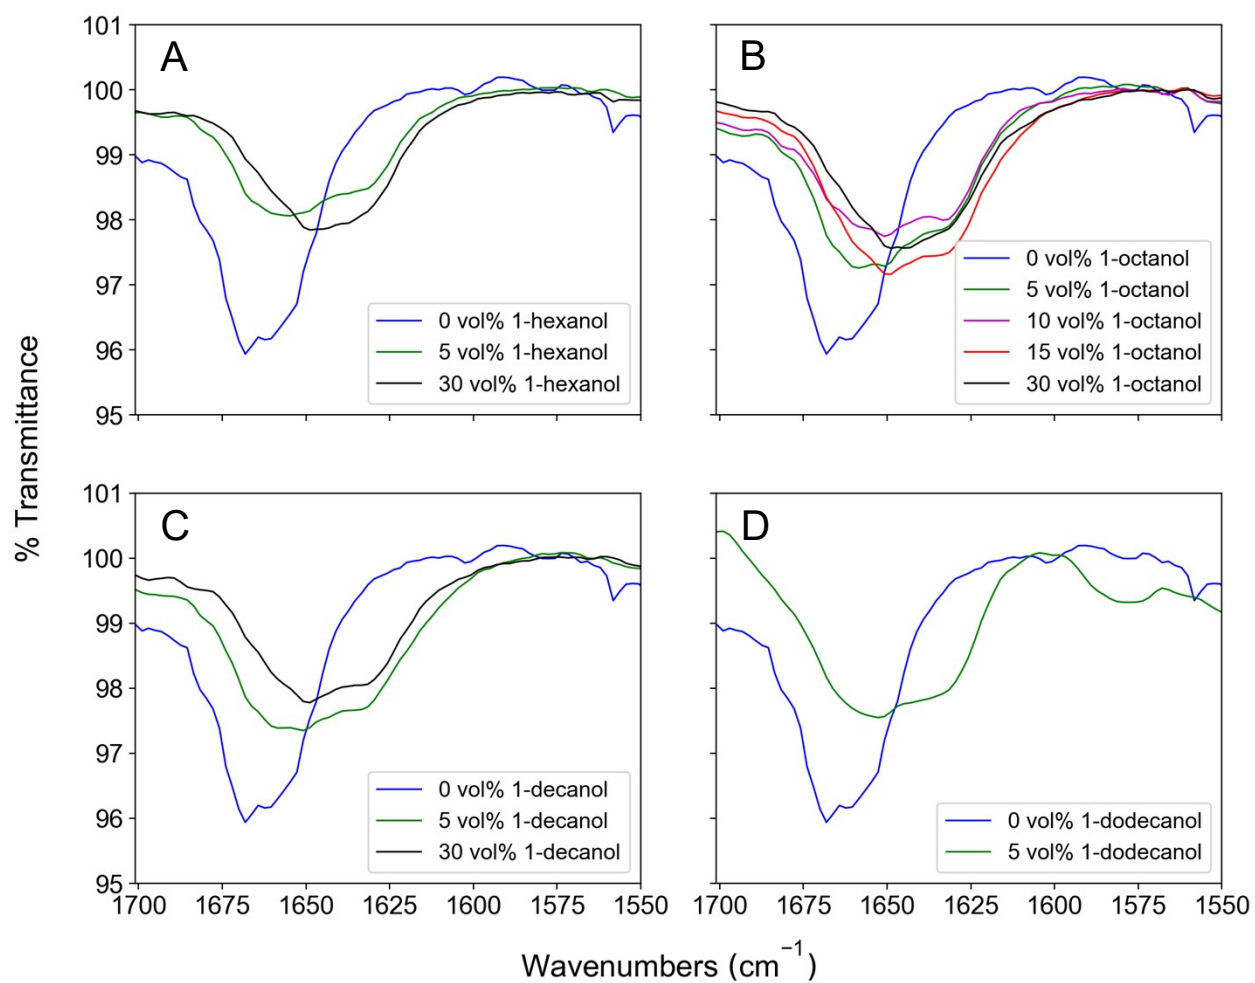

Figure S10. IR carbonyl spectra of fresh organic phases, (A) 1-hexanol, (B) 1-octanol, (C) 1-decanol, (D) 1-dodecanol.

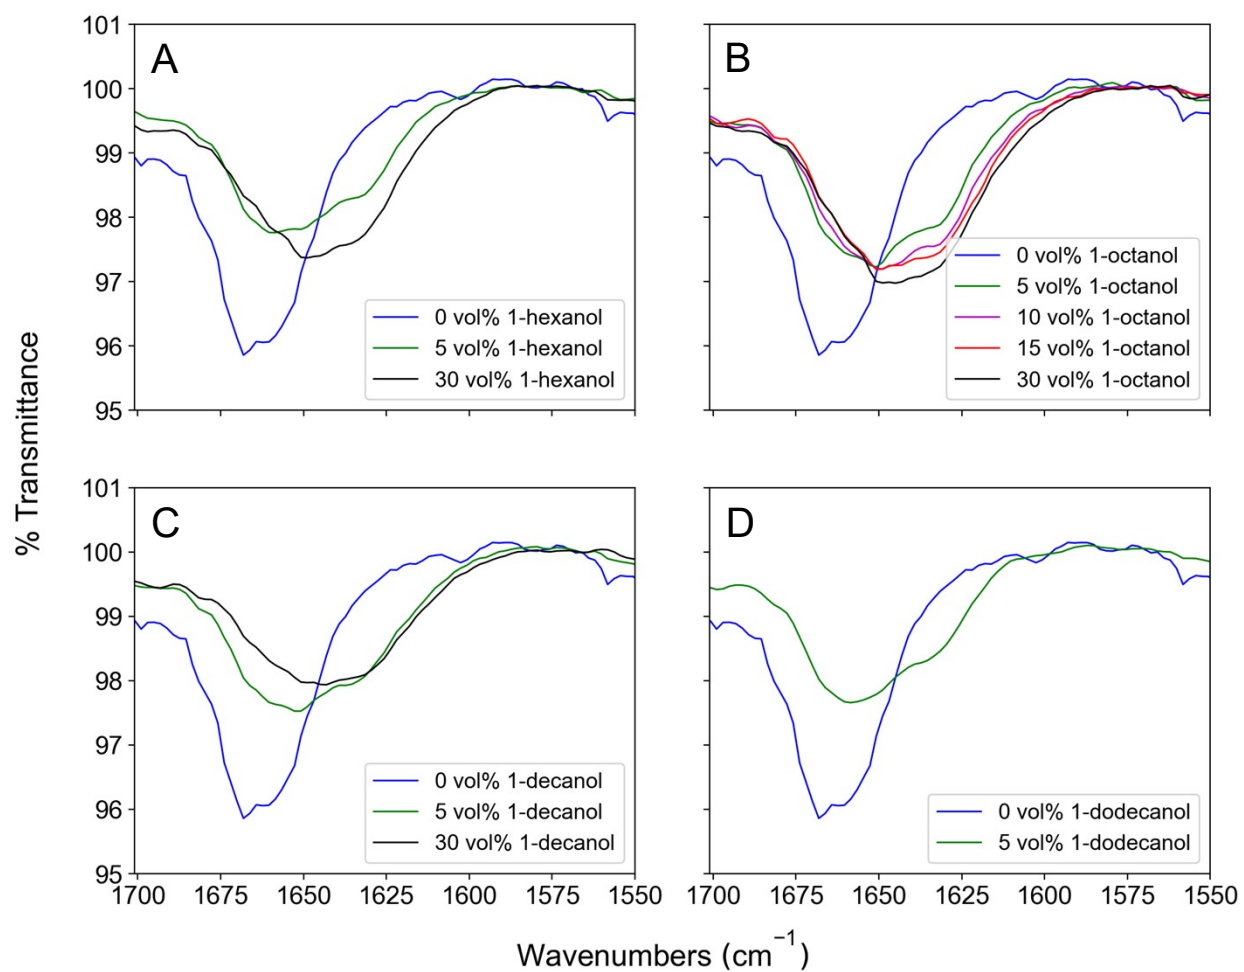

Figure S11. IR carbonyl spectra of organic phases after contact with 1 M HNO<sub>3</sub>, (A) 1-hexanol, (B) 1-octanol, (C) 1-decanol, (D) 1-dodecanol.

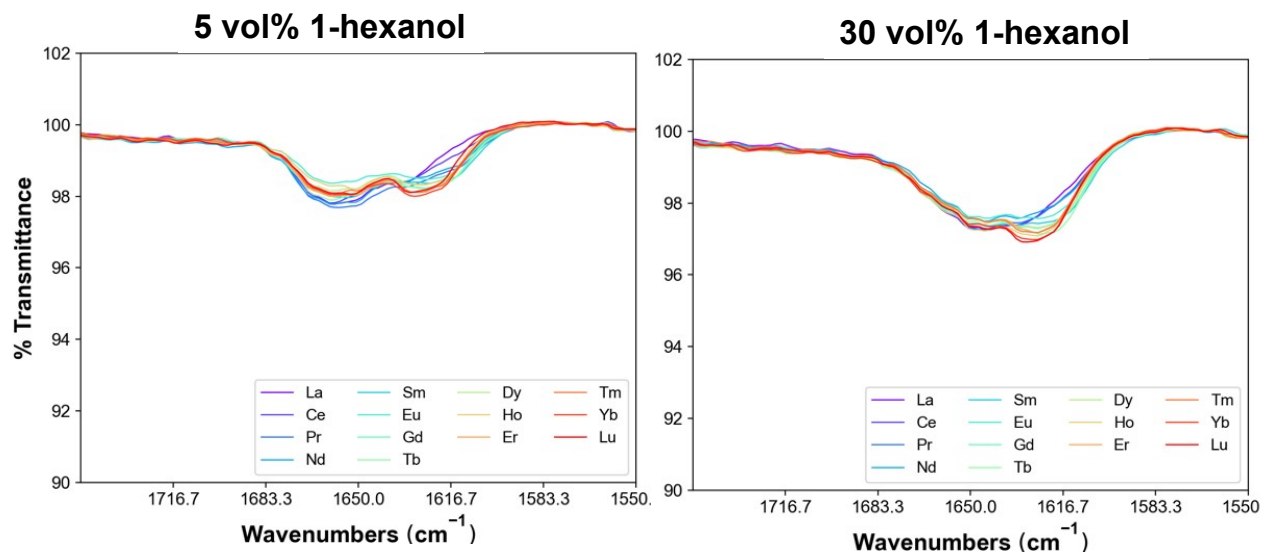

Figure S12. IR carbonyl spectra of 1-hexanol containing organic phases following Ln contact. (left) organic phase containing 5 vol% 1-hexanol and (right) organic phase containing 30 vol% 1-hexanol.

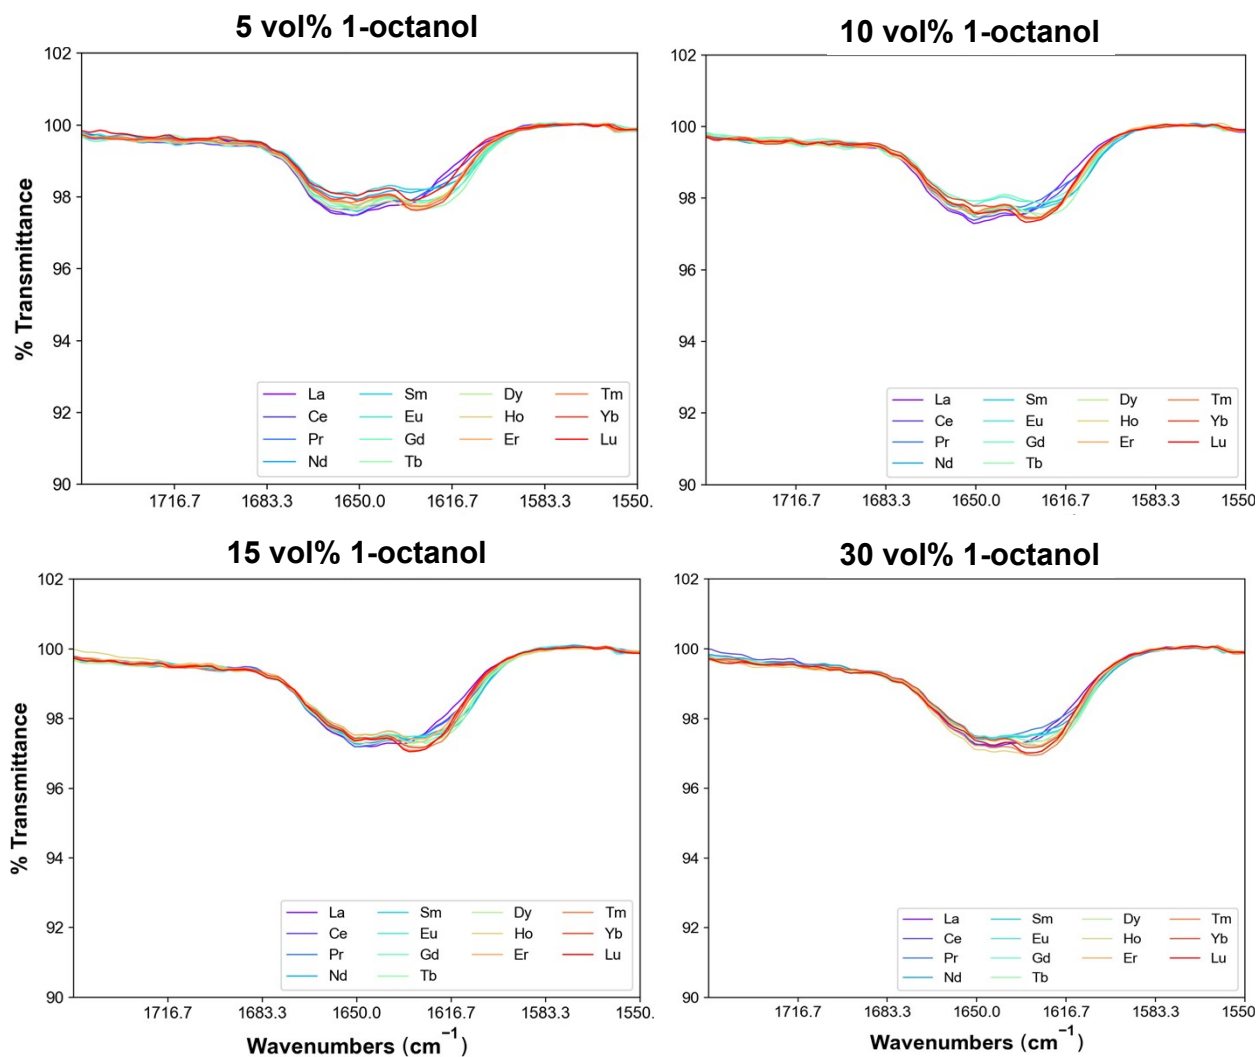

Figure S13. IR carbonyl spectra of 1-octanol containing organic phases following Ln contact. Organic phases were containing (top left) 5 vol% 1-octanol, (top right) 10 vol% 1-octanol, (bottom left) 15 vol% 1-octanol, and (bottom right) 30 vol% 1-octanol.

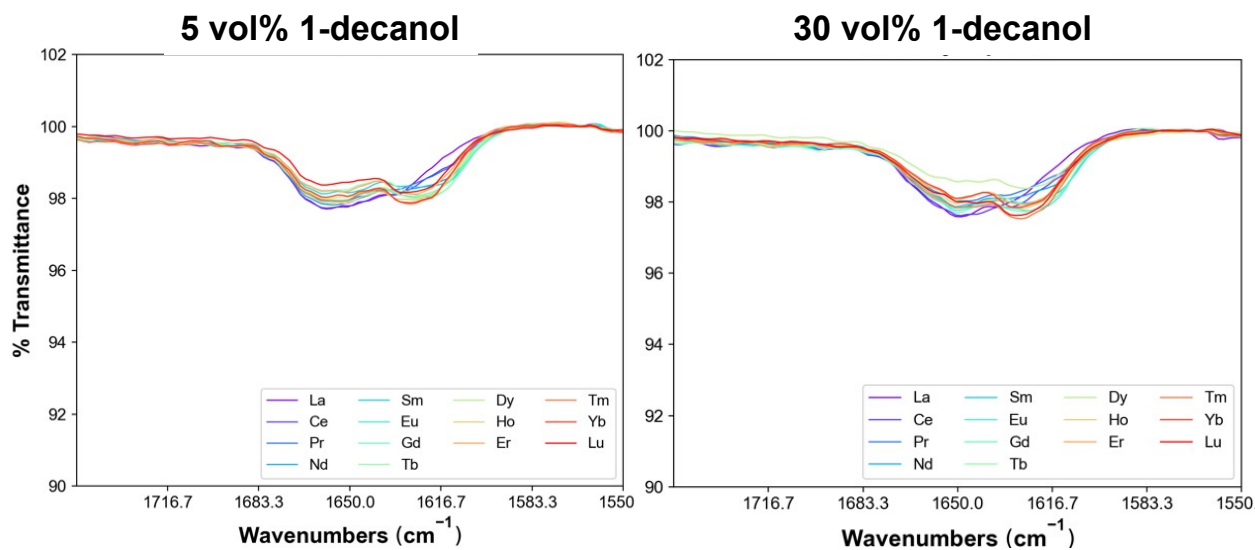

Figure S14. IR carbonyl spectra of 1-decanol containing organic phases following Ln contact. (left) organic phase containing 5 vol% 1-decanol and (right) organic phase containing 30 vol% 1-decanol.

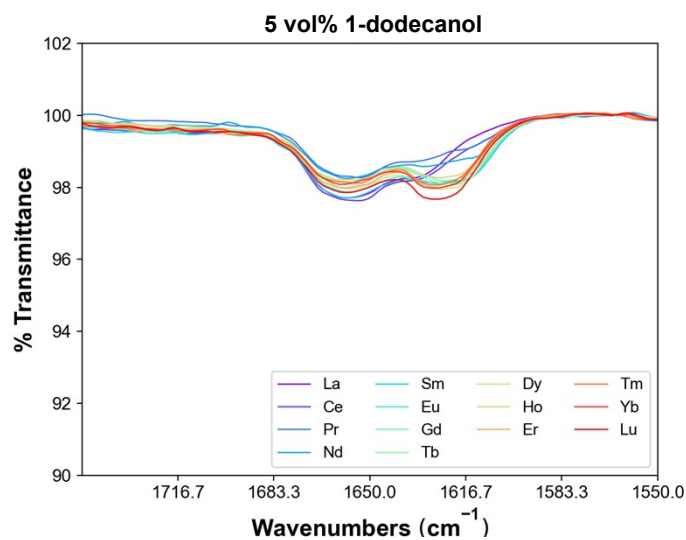

Figure S15. IR carbonyl spectra of 1-dodecanol containing organic phases following Ln contact. Organic phases were containing (left) 5 vol% 1- dodecanol and (right) 30 vol% 1- dodecanol.

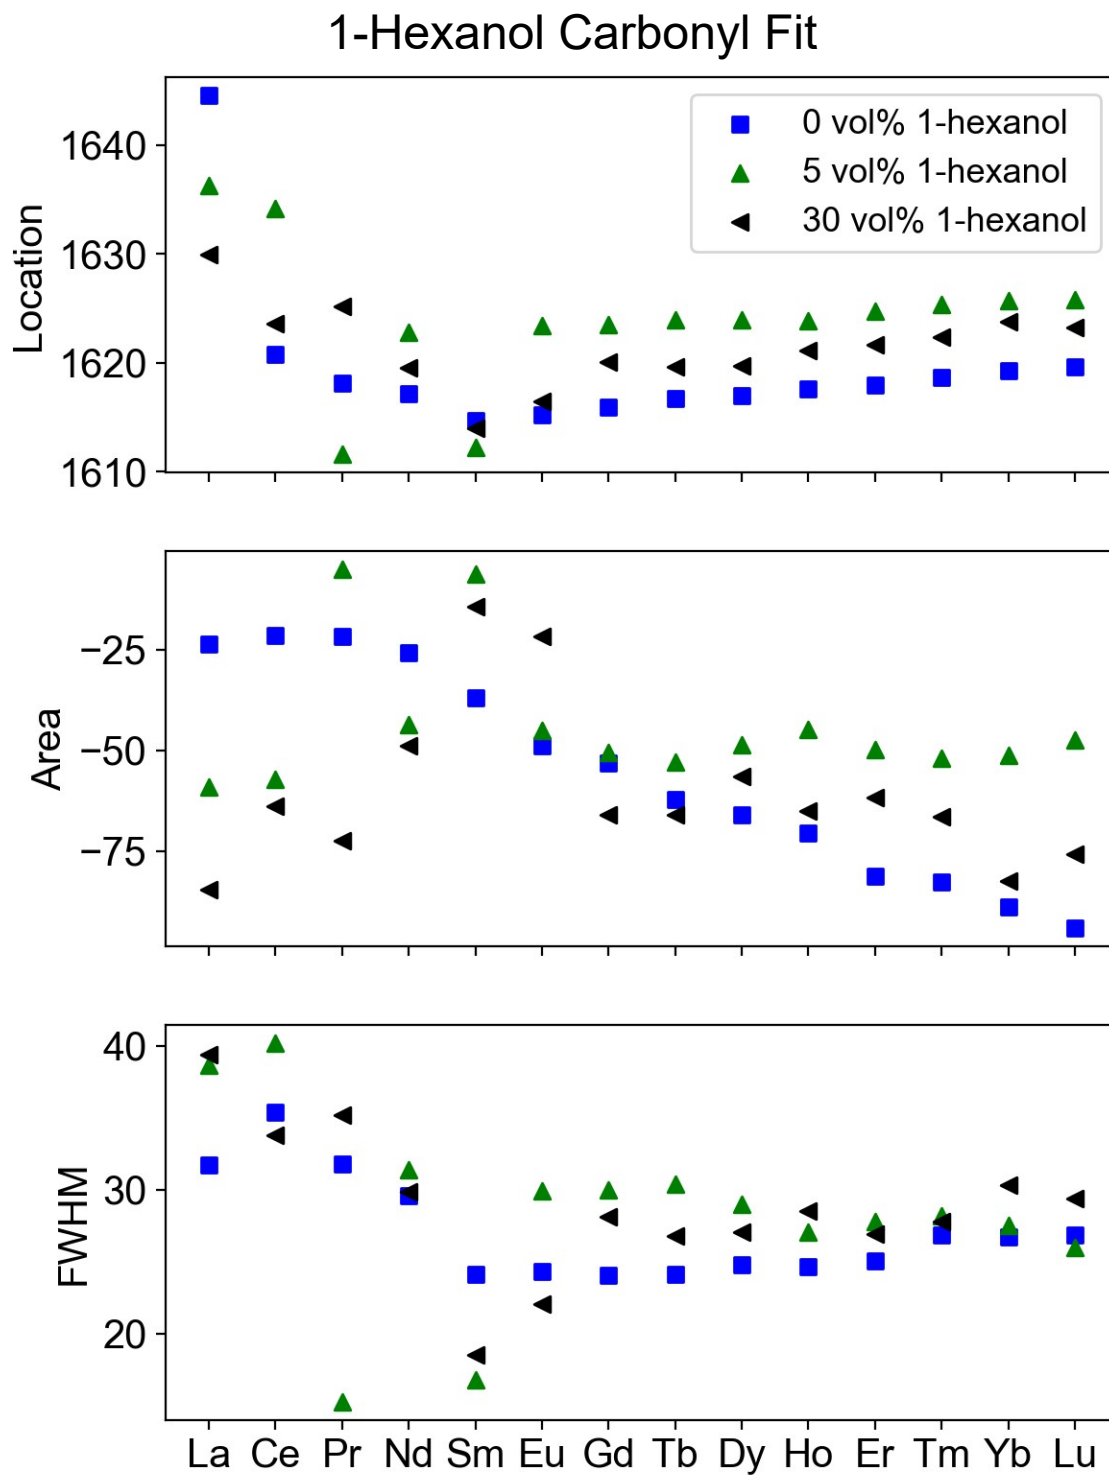

Figure S16. Results from fitting the carbonyl peaks after Ln contact for 1-hexanol systems in OriginLab. Peak analysis yielded three peak properties, location (wavenumber), area, and FWHM.

# 1-Octanol Carbonyl Fit

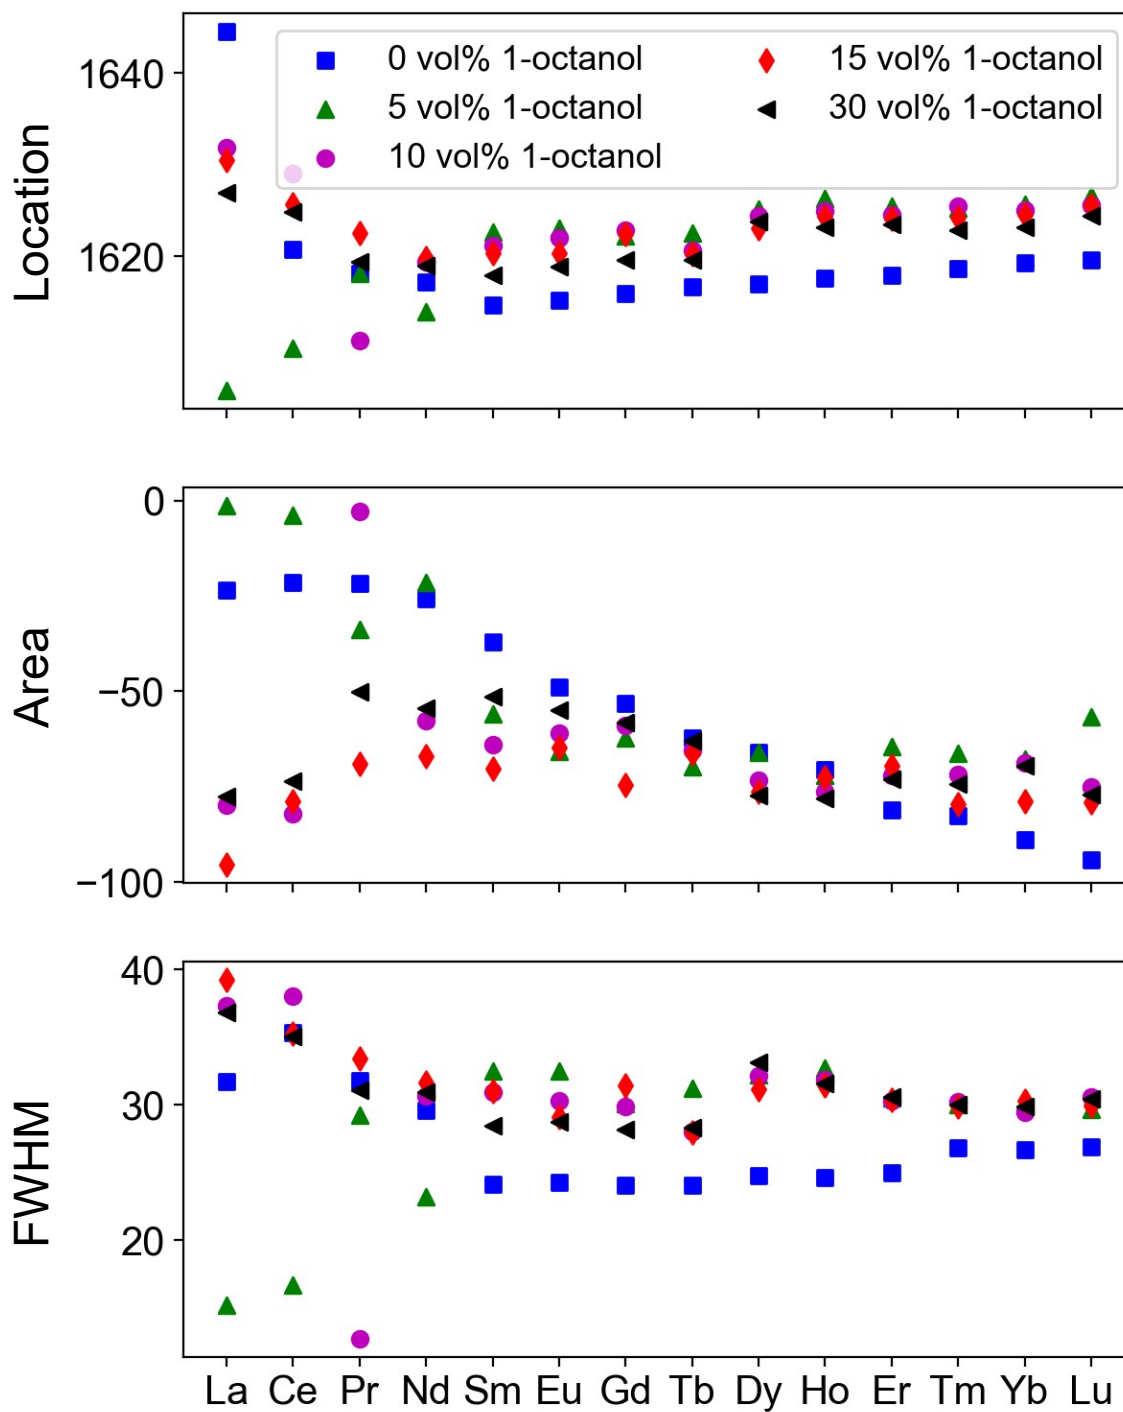

Figure S17. Results from fitting the carbonyl peaks after Ln contact for 1-octanol systems in OriginLab. Peak analysis yielded three peak properties, location (wavenumber), area, and FWHM.



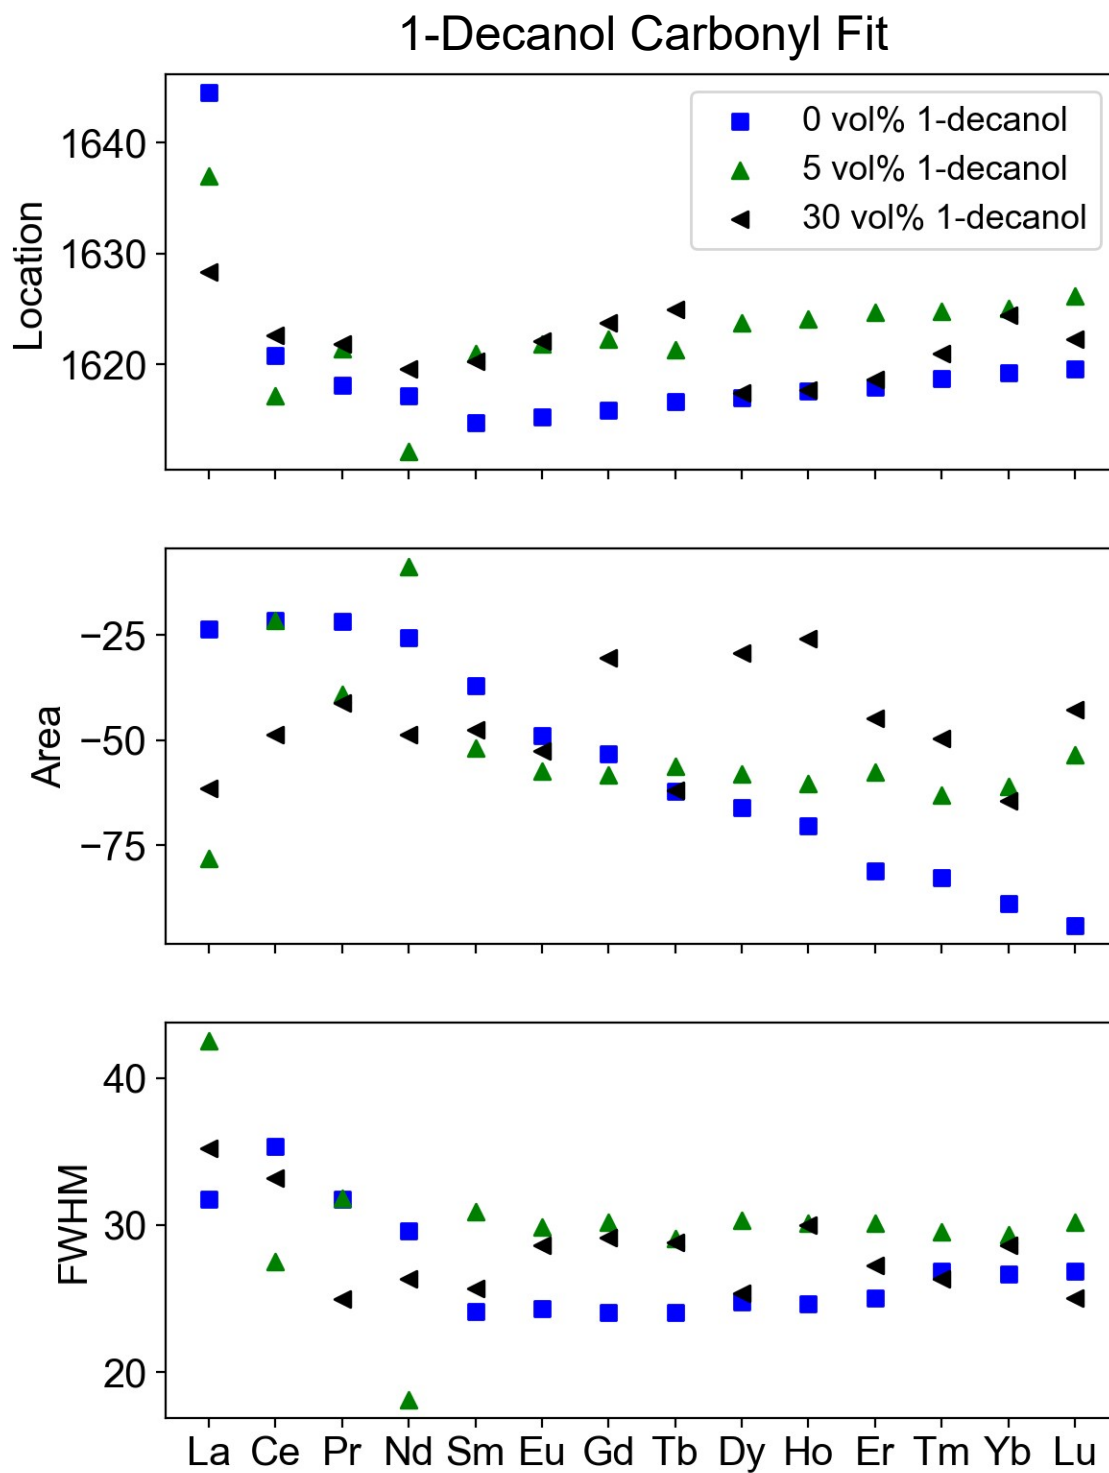

Figure S18. Results from fitting the carbonyl peaks after Ln contact for 1-decanol systems in OriginLab. Peak analysis yielded three peak properties, location (wavenumber), area, and FWHM.

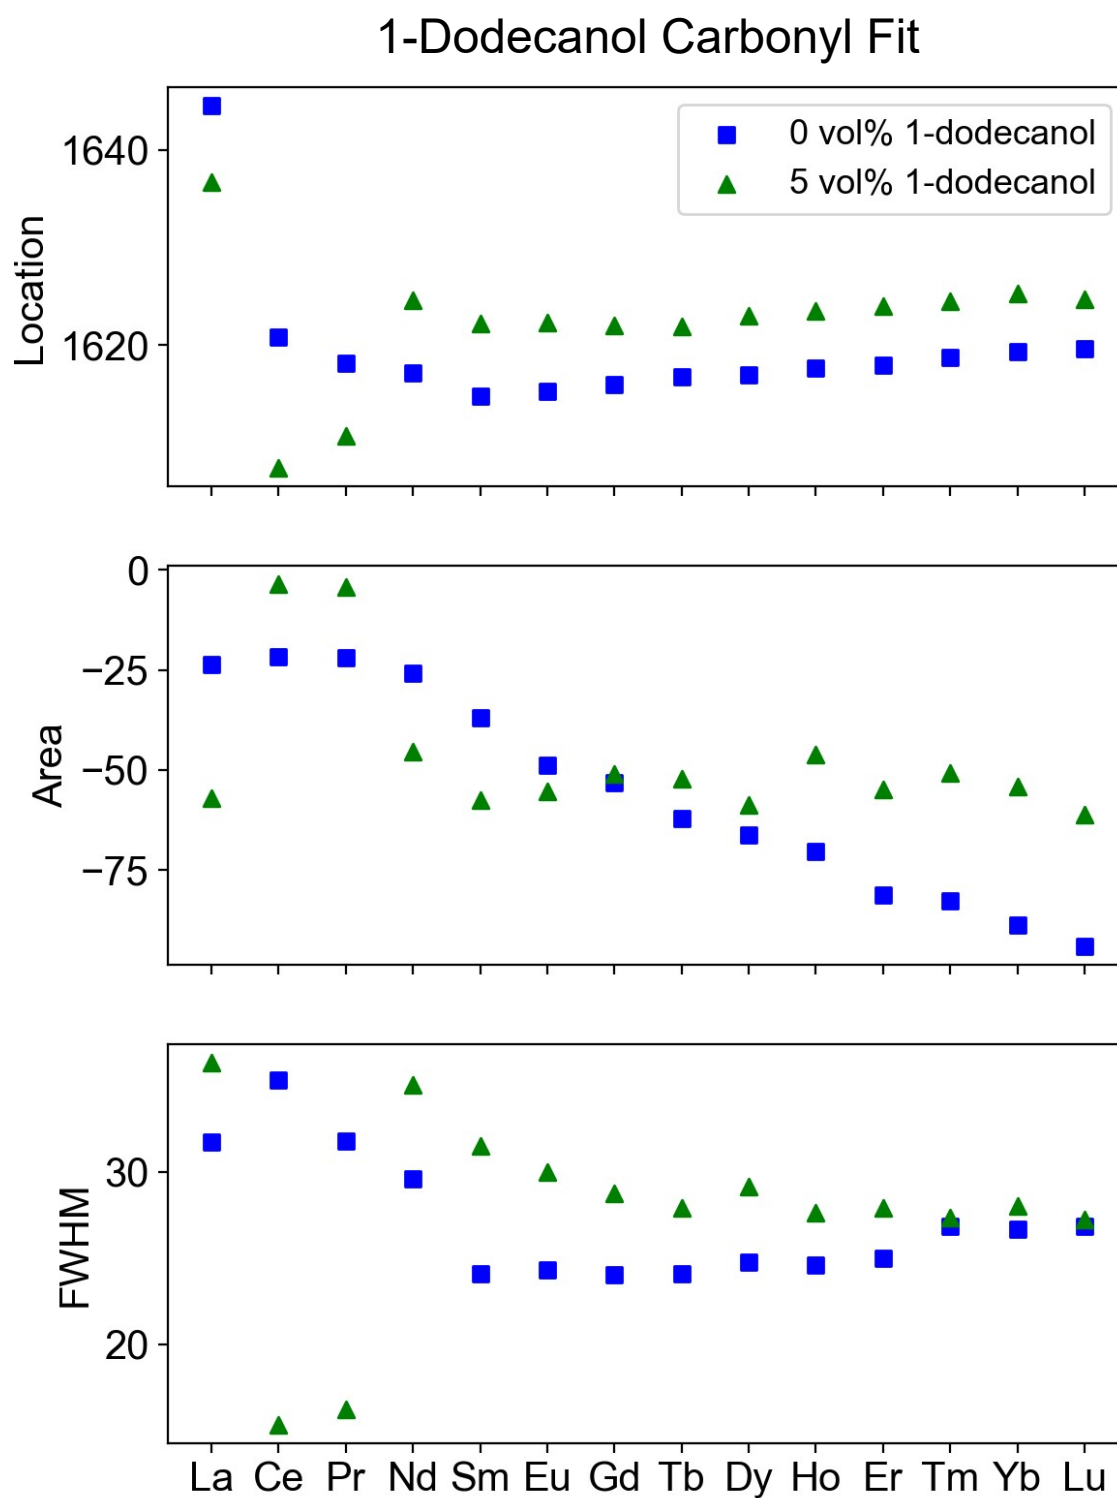

Figure S19. Results from fitting the carbonyl peaks after Ln contact for 1-dodecanol systems in OriginLab. Peak analysis yielded three peak properties, location (wavenumber), area, and FWHM.

## OriginLab Carbonyl Spectra Peak Fits

*No modifiers*

### Peak Analysis

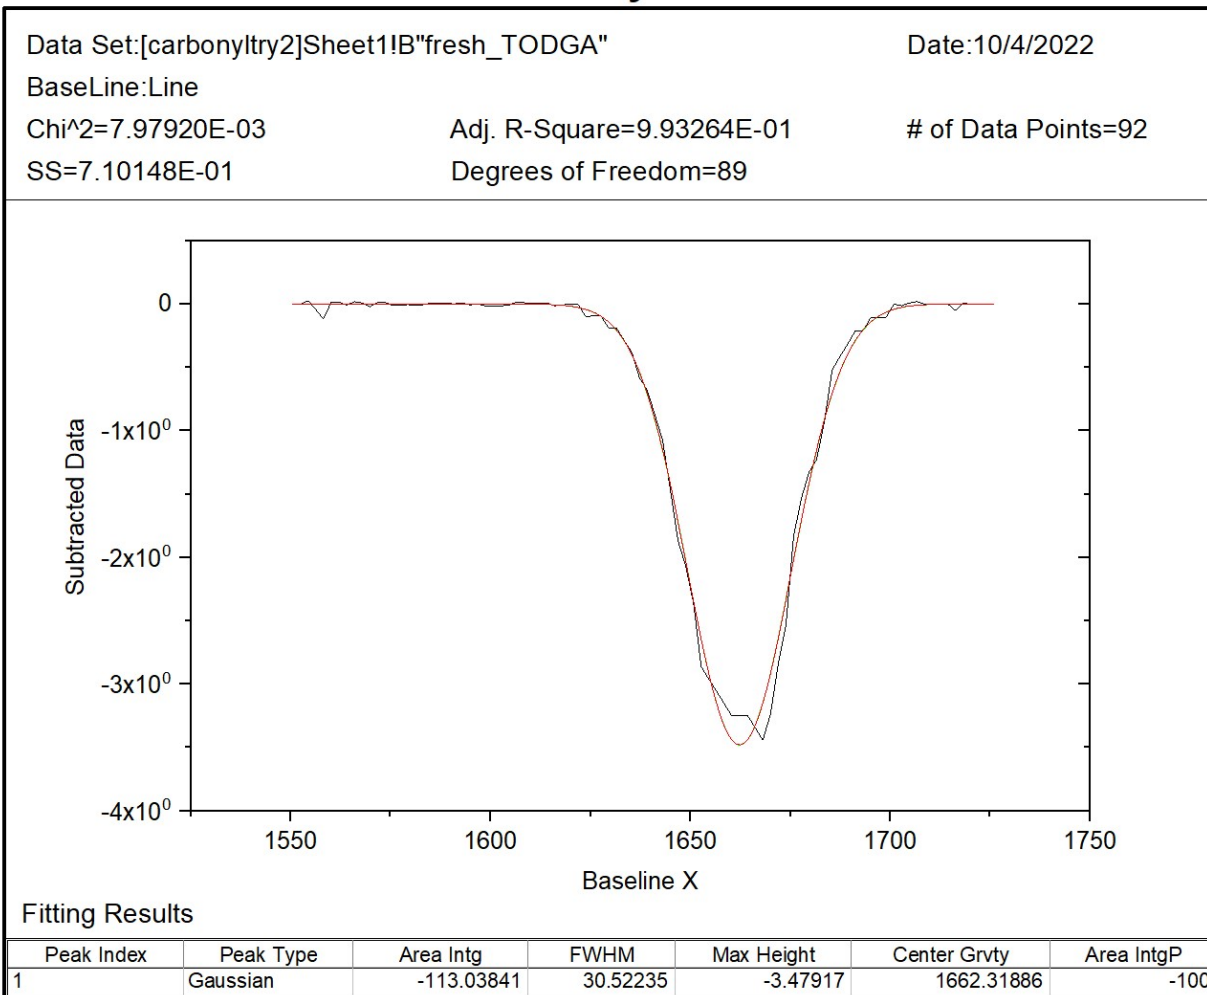

Figure S20. Peak analysis via OriginLab for 0.04 M of fresh TODGA in n-dodecane without phase modifier.

## Peak Analysis

Data Set:[carbonyltry2]Sheet1!C"preeqm\_TODGA"

Date:10/4/2022

BaseLine:Line

Chi^2=2.40392E-03

Adj. R-Square=9.97984E-01

# of Data Points=92

SS=2.06737E-01

Degrees of Freedom=86

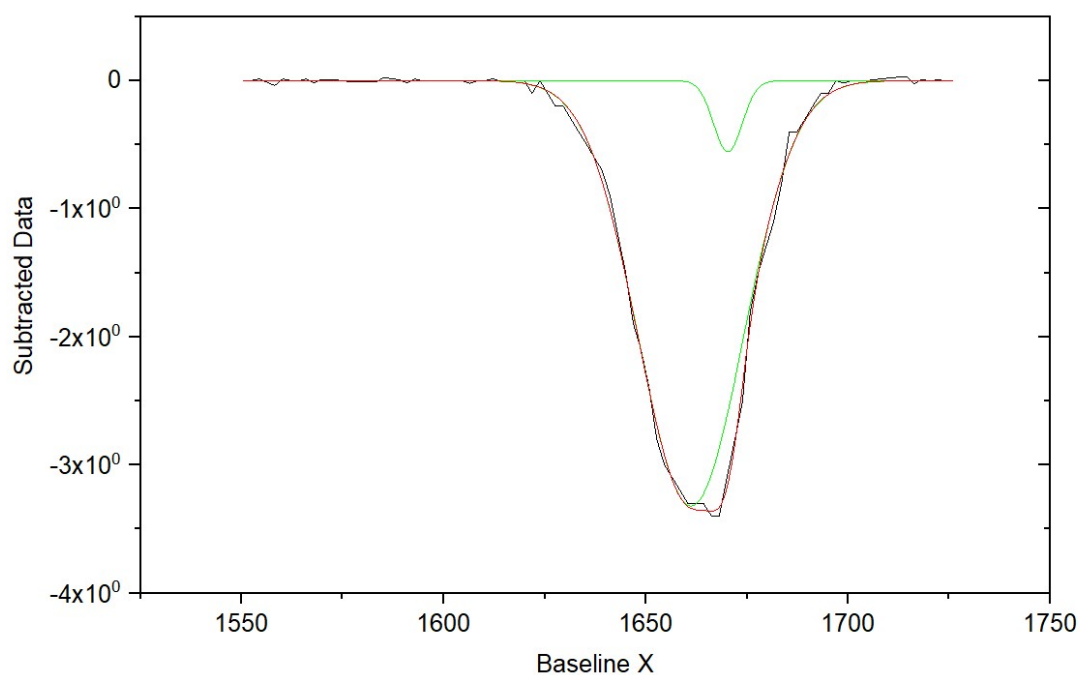

### Fitting Results

| Peak Index | Peak Type | Area Intg  | FWHM     | Max Height | Center Grvty | Area IntgP |
|------------|-----------|------------|----------|------------|--------------|------------|
| 1          | Gaussian  | -107.84203 | 30.52369 | -3.31909   | 1661.14153   | -95.63584  |
| 2          | Gaussian  | -4.92117   | 8.32191  | -0.55554   | 1670.28306   | -4.36416   |

Figure S21. Peak analysis via OriginLab for 0.04 M TODGA in n-dodecane without phase modifier after contact with 1 M HNO<sub>3</sub>.

## Peak Analysis

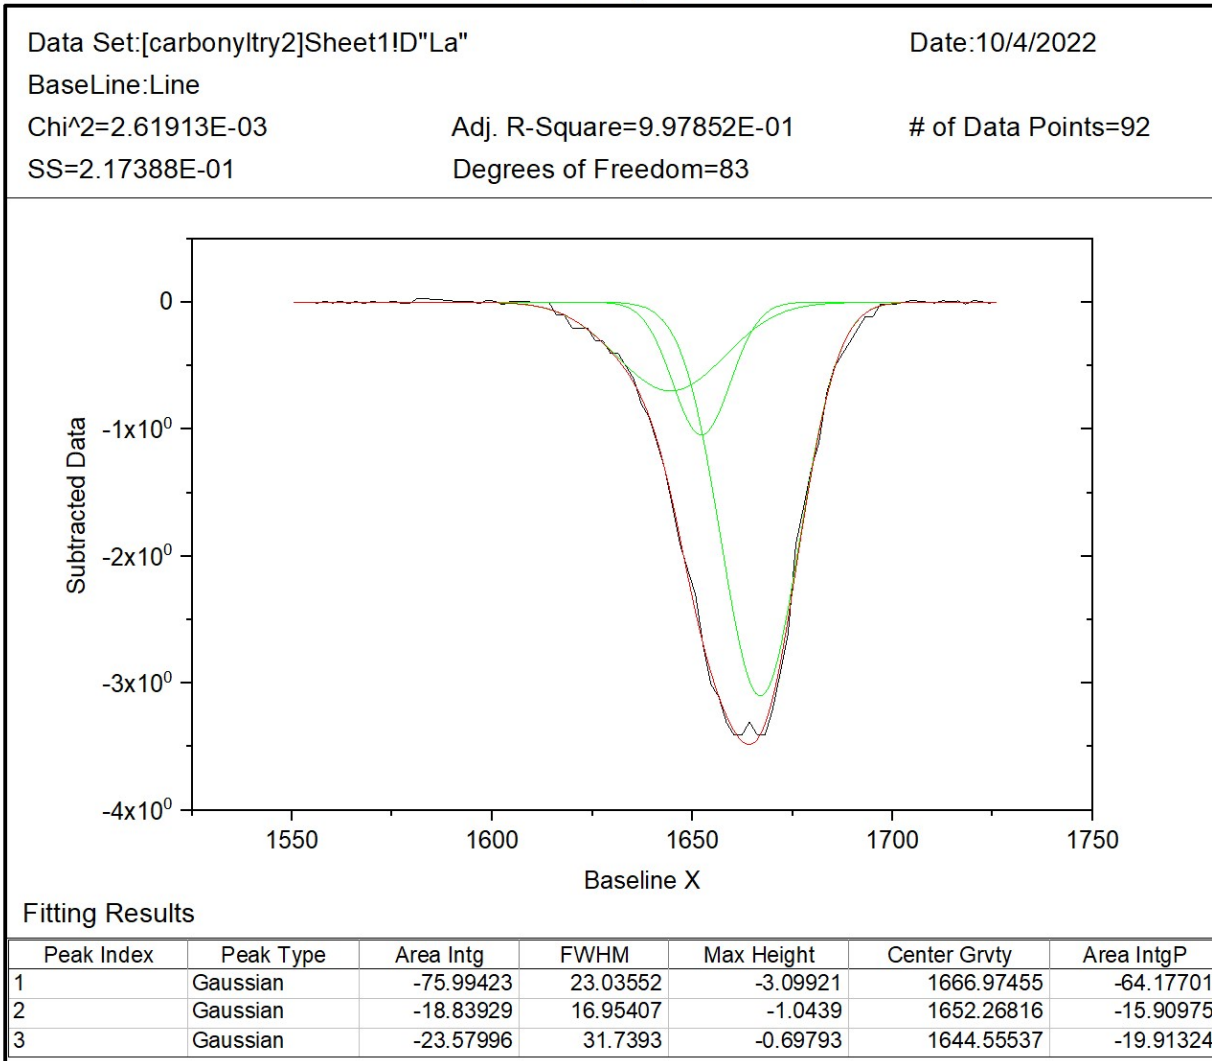

Figure S22. Peak analysis via OriginLab for 0.04 M TODGA in n-dodecane without phase modifier after contact with 3 mM La(NO<sub>3</sub>)<sub>3</sub> in 1 M HNO<sub>3</sub>.

## Peak Analysis

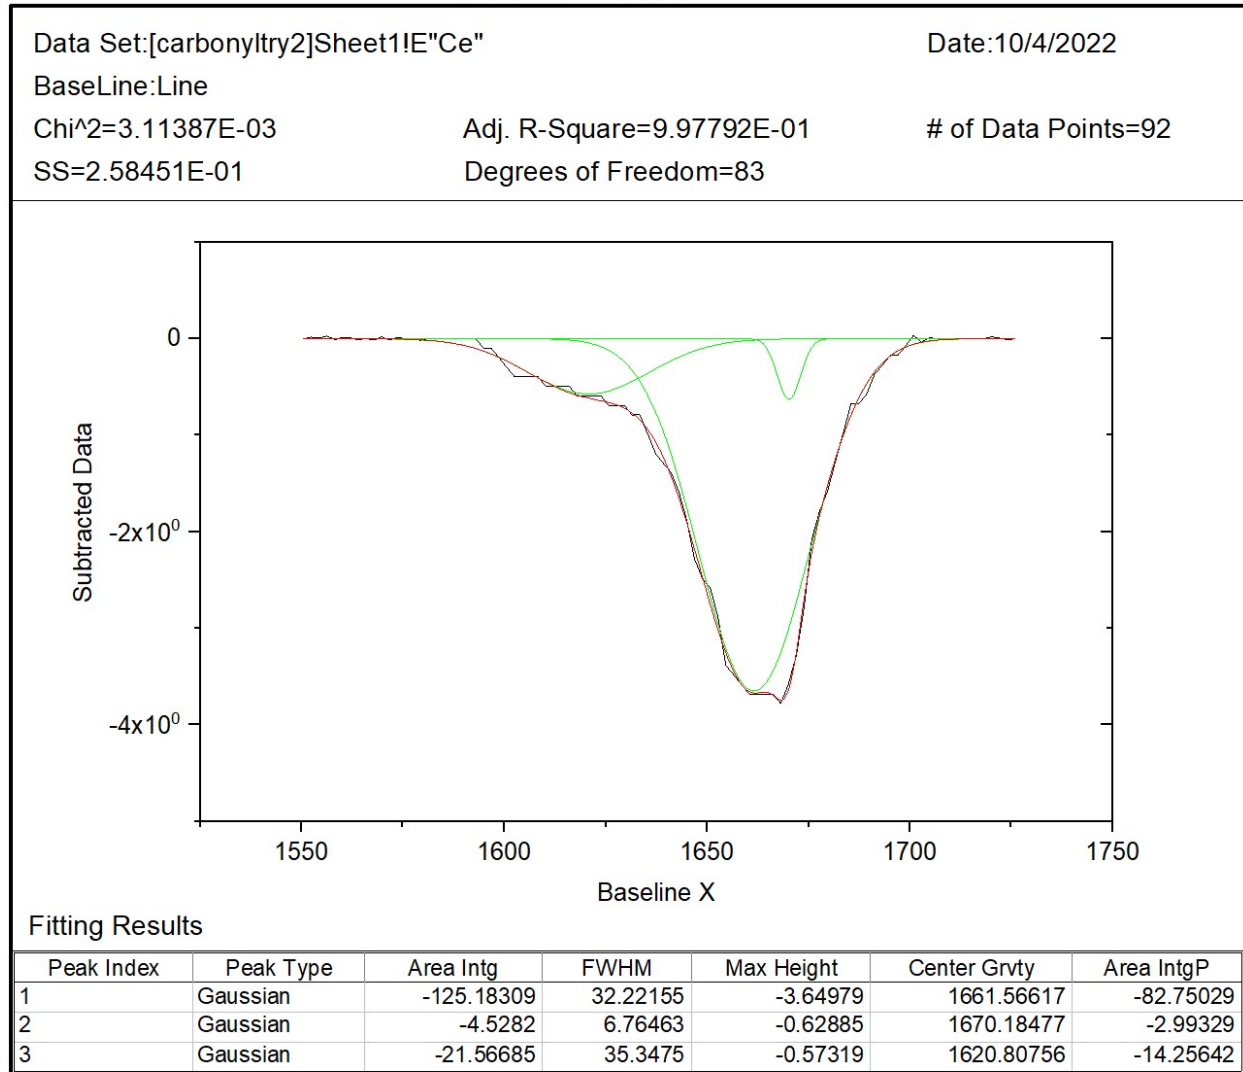

Figure S23. Peak analysis via OriginLab for 0.04 M TODGA in n-dodecane without phase modifier after contact with 3 mM  $\text{Ce}(\text{NO}_3)_3$  in 1 M  $\text{HNO}_3$ .

## Peak Analysis

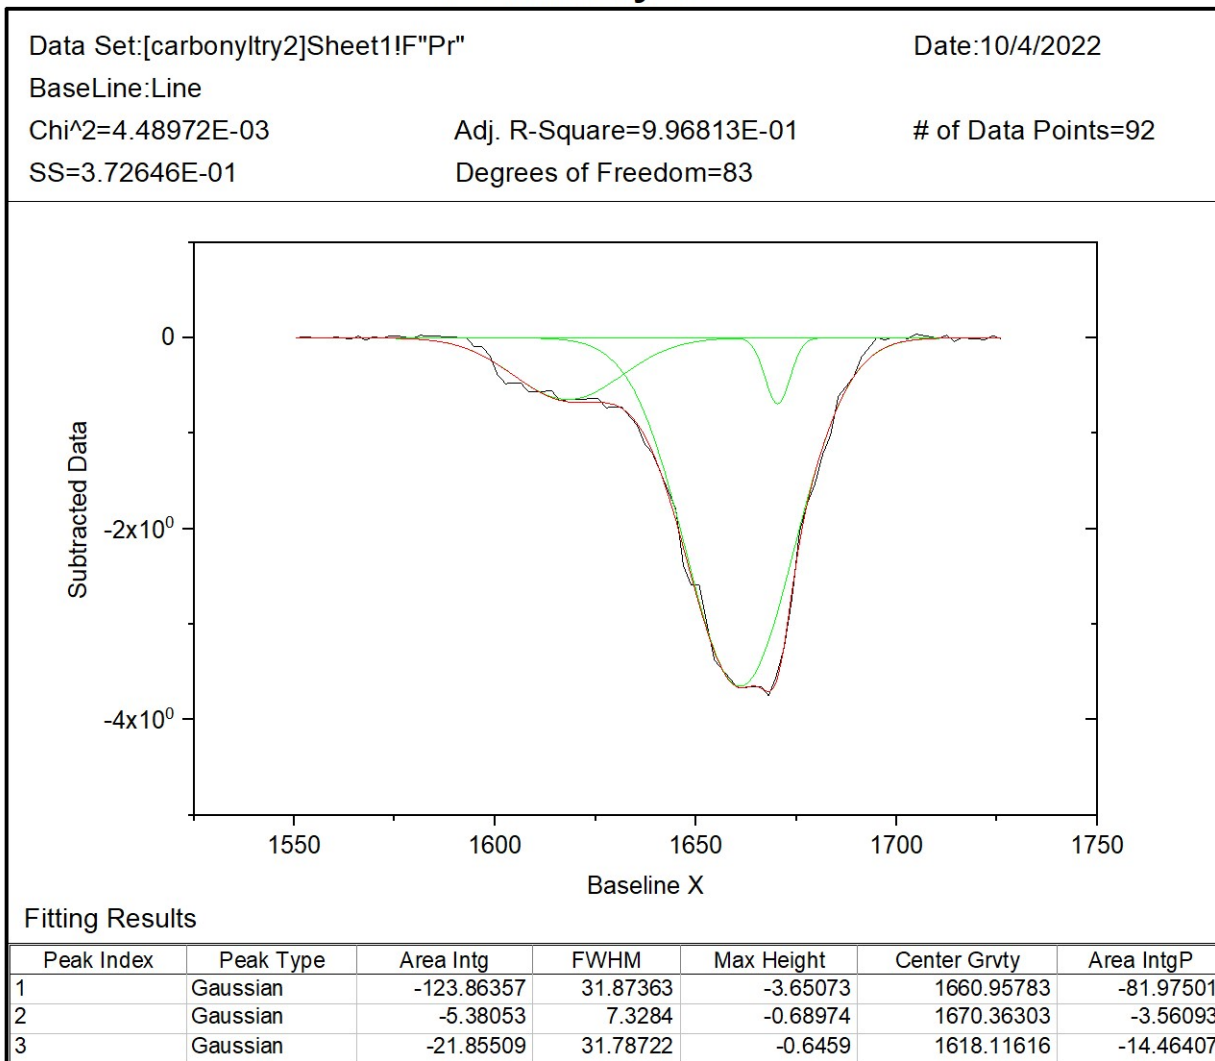

Figure S24. Peak analysis via OriginLab for 0.04 M TODGA in n-dodecane without phase modifier after contact with 3 mM Pr(NO<sub>3</sub>)<sub>3</sub> in 1 M HNO<sub>3</sub>.

## Peak Analysis

Data Set:[carbonyltr2]Sheet1!G"Nd"

Date:10/4/2022

BaseLine:Line

Chi<sup>2</sup>=5.14046E-03

Adj. R-Square=9.96506E-01

# of Data Points=92

SS=4.26658E-01

Degrees of Freedom=83

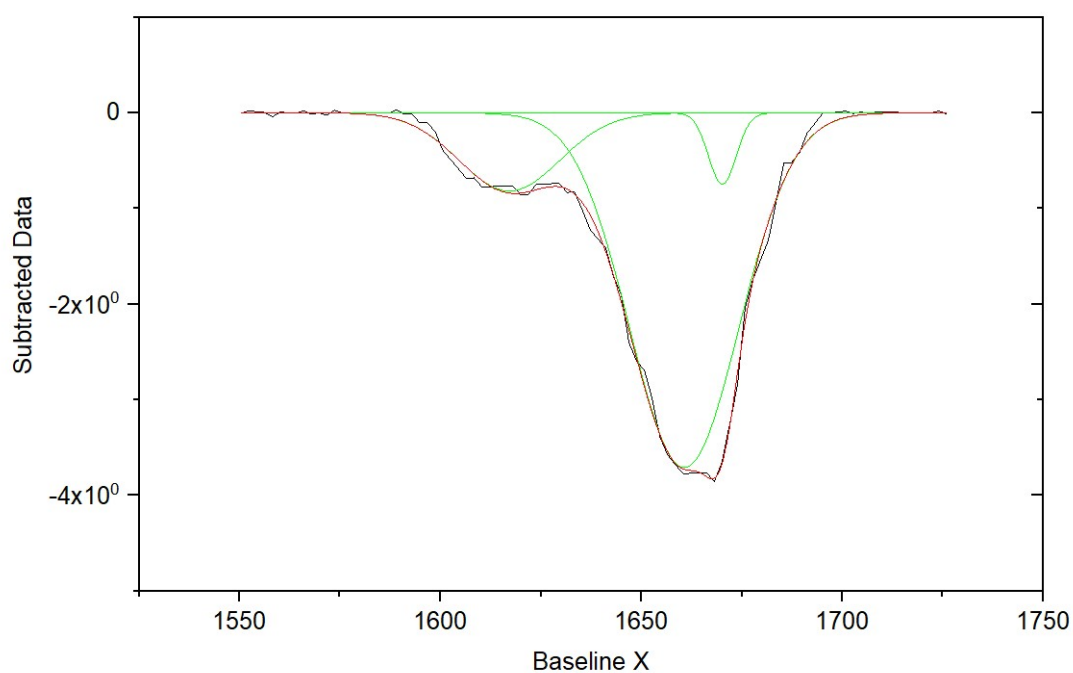

### Fitting Results

| Peak Index | Peak Type | Area Intg  | FWHM     | Max Height | Center Grvty | Area IntgP |
|------------|-----------|------------|----------|------------|--------------|------------|
| 1          | Gaussian  | -25.71971  | 29.59312 | -0.81648   | 1617.17718   | -16.21143  |
| 2          | Gaussian  | -126.48436 | 32.0314  | -3.70962   | 1660.6927    | -79.72452  |
| 3          | Gaussian  | -6.4477    | 8.10881  | -0.74699   | 1670.16343   | -4.06406   |

Figure S25. Peak analysis via OriginLab for 0.04 M TODGA in n-dodecane without phase modifier after contact with 3 mM Nd(NO<sub>3</sub>)<sub>3</sub> in 1 M HNO<sub>3</sub>.



## Peak Analysis

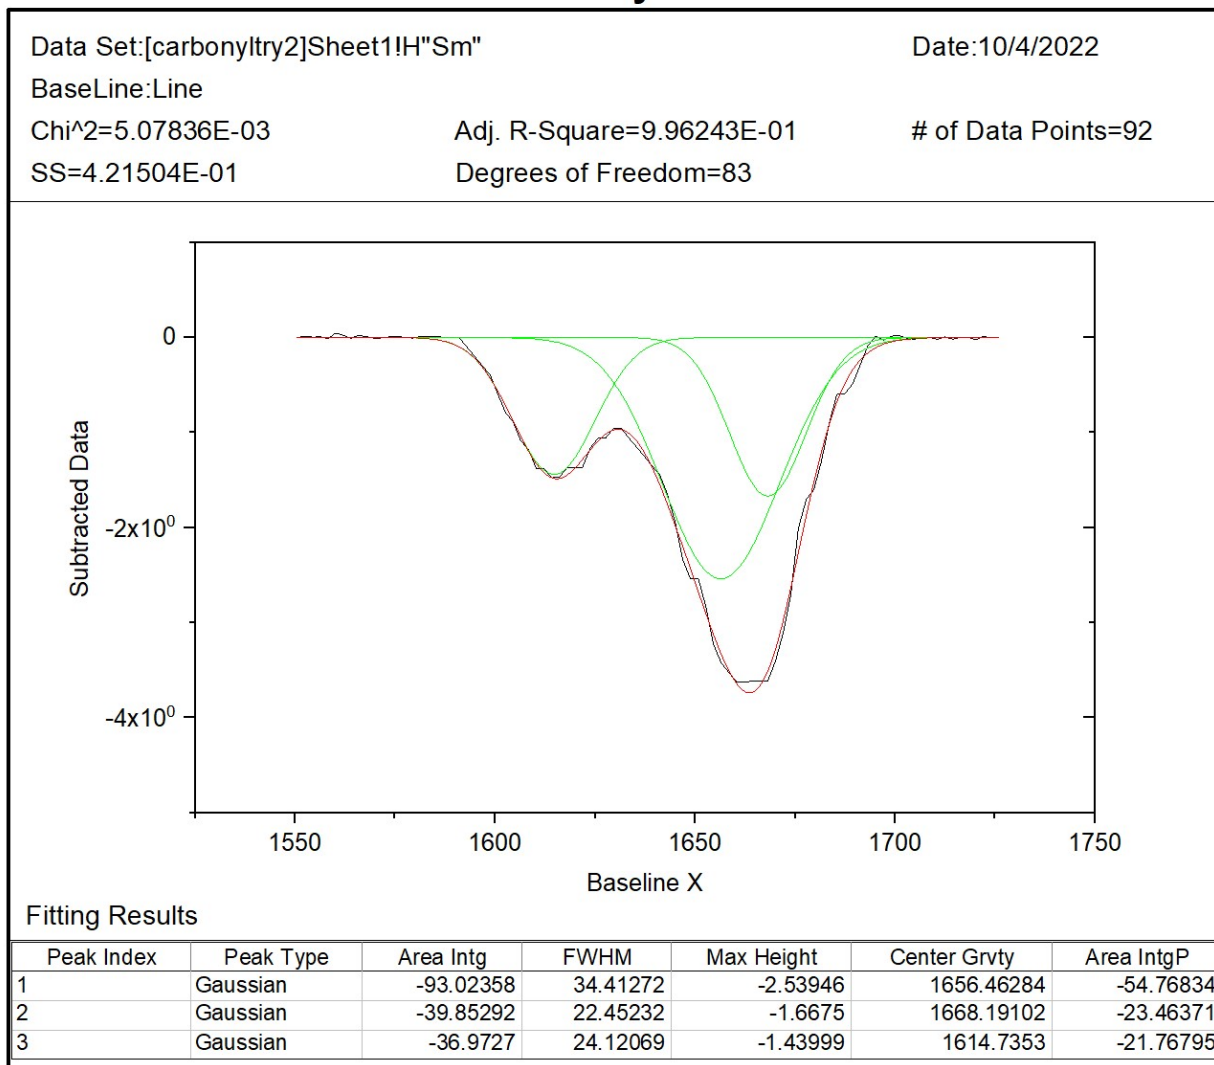

Figure S26. Peak analysis via OriginLab for 0.04 M TODGA in n-dodecane without phase modifier after contact with 3 mM Sm(NO<sub>3</sub>)<sub>3</sub> in 1 M HNO<sub>3</sub>.

## Peak Analysis

Data Set:[carbonyltry2]Sheet1!!"Eu"

Date:10/4/2022

BaseLine:Line

Chi^2=7.29102E-03

Adj. R-Square=9.94940E-01

# of Data Points=92

SS=6.05154E-01

Degrees of Freedom=83

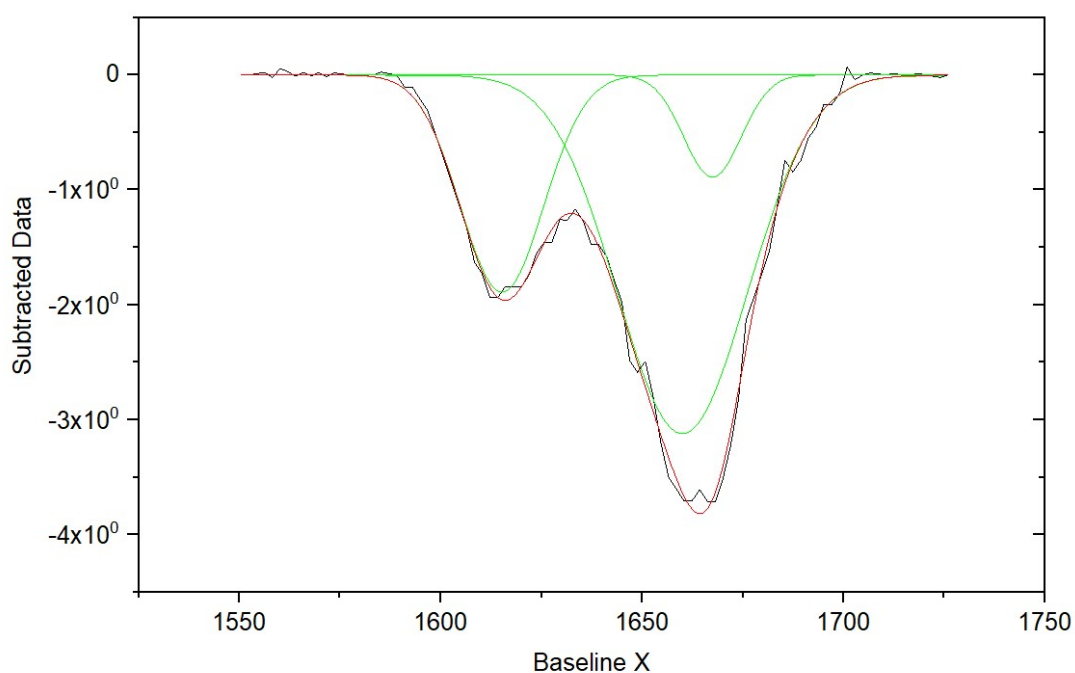

Fitting Results

| Peak Index | Peak Type | Area Intg  | FWHM     | Max Height | Center Grvty | Area IntgP |
|------------|-----------|------------|----------|------------|--------------|------------|
| 1          | Gaussian  | -48.89803  | 24.30375 | -1.8901    | 1615.22373   | -25.53755  |
| 2          | Gaussian  | -126.66351 | 38.11923 | -3.12166   | 1660.00122   | -66.15145  |
| 3          | Gaussian  | -15.9135   | 16.82141 | -0.88873   | 1667.46606   | -8.31101   |

Figure S27. Peak analysis via OriginLab for 0.04 M TODGA in n-dodecane without phase modifier after contact with 3 mM Eu(NO<sub>3</sub>)<sub>3</sub> in 1 M HNO<sub>3</sub>.

## Peak Analysis

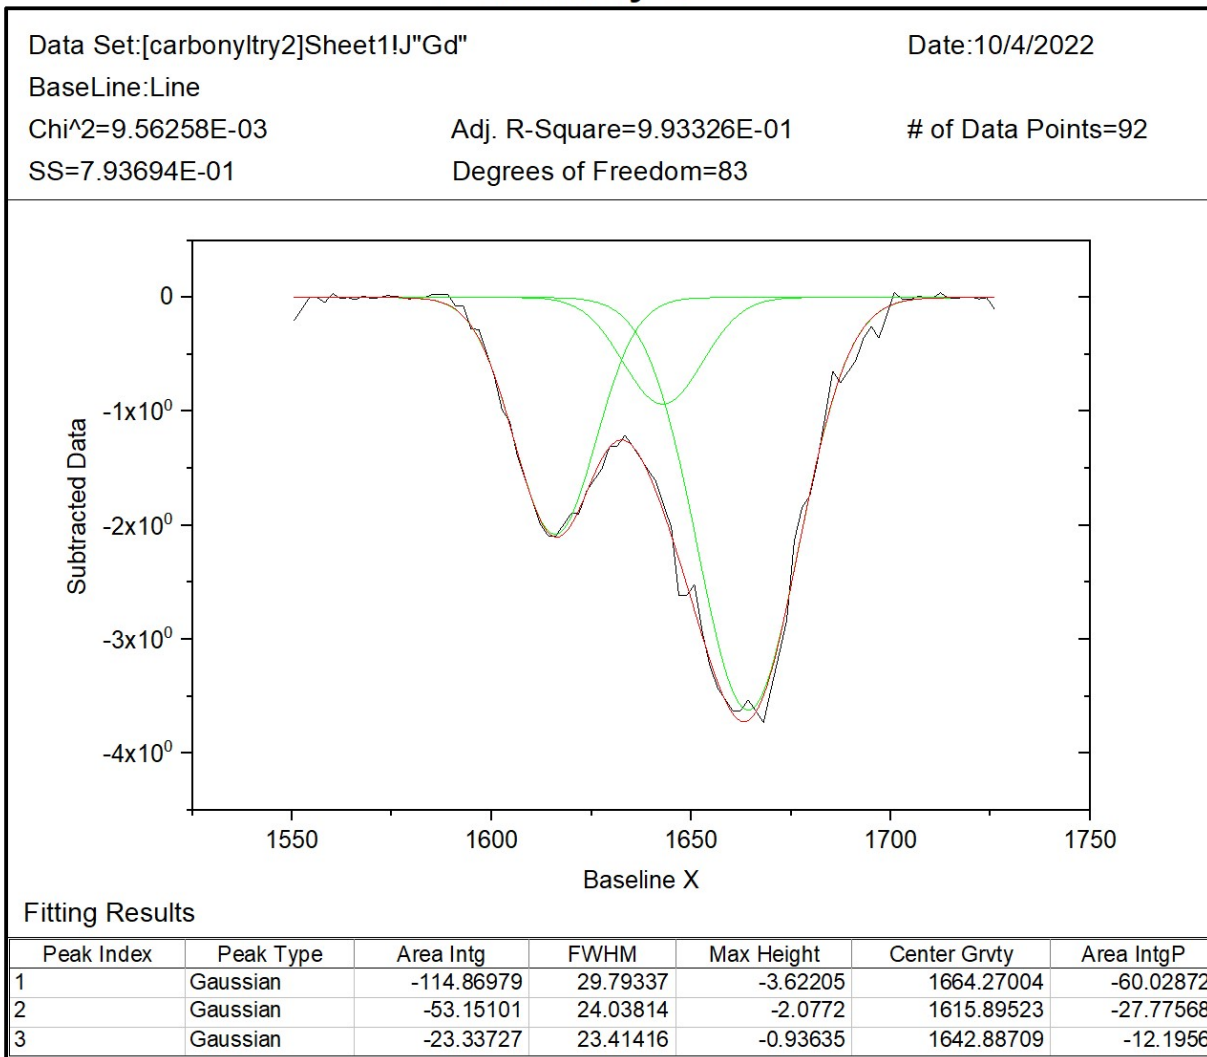

Figure S28. Peak analysis via OriginLab for 0.04 M TODGA in n-dodecane without phase modifier after contact with 3 mM Gd(NO<sub>3</sub>)<sub>3</sub> in 1 M HNO<sub>3</sub>.

## Peak Analysis

Data Set:[carbonyltr2]Sheet1!K"Tb"

Date:10/4/2022

BaseLine:Line

Chi^2=6.62291E-03

Adj. R-Square=9.95461E-01

# of Data Points=92

SS=5.49702E-01

Degrees of Freedom=83

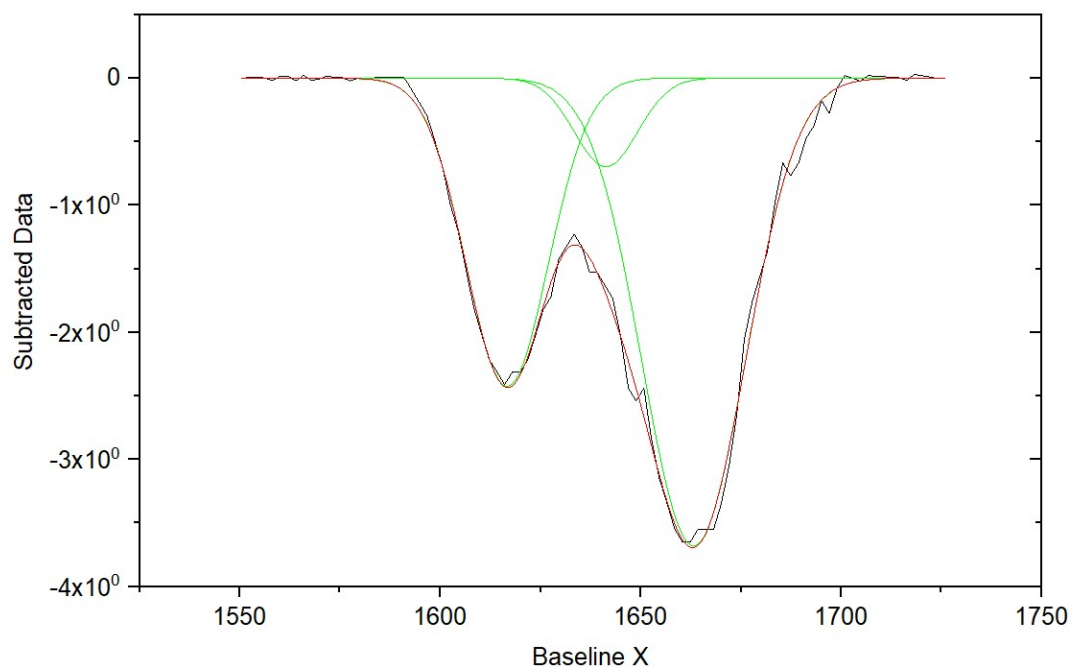

Fitting Results

| Peak Index | Peak Type | Area Intg  | FWHM     | Max Height | Center Grvty | Area IntgP |
|------------|-----------|------------|----------|------------|--------------|------------|
| 1          | Gaussian  | -62.1367   | 24.0849  | -2.42366   | 1616.68564   | -31.8966   |
| 2          | Gaussian  | -118.87863 | 30.36299 | -3.67813   | 1663.20953   | -61.02391  |
| 3          | Gaussian  | -13.79132  | 18.63079 | -0.69541   | 1641.33332   | -7.07949   |

Figure S29. Peak analysis via OriginLab for 0.04 M TODGA in n-dodecane without phase modifier after contact with 3 mM Tb(NO<sub>3</sub>)<sub>3</sub> in 1 M HNO<sub>3</sub>.

## Peak Analysis

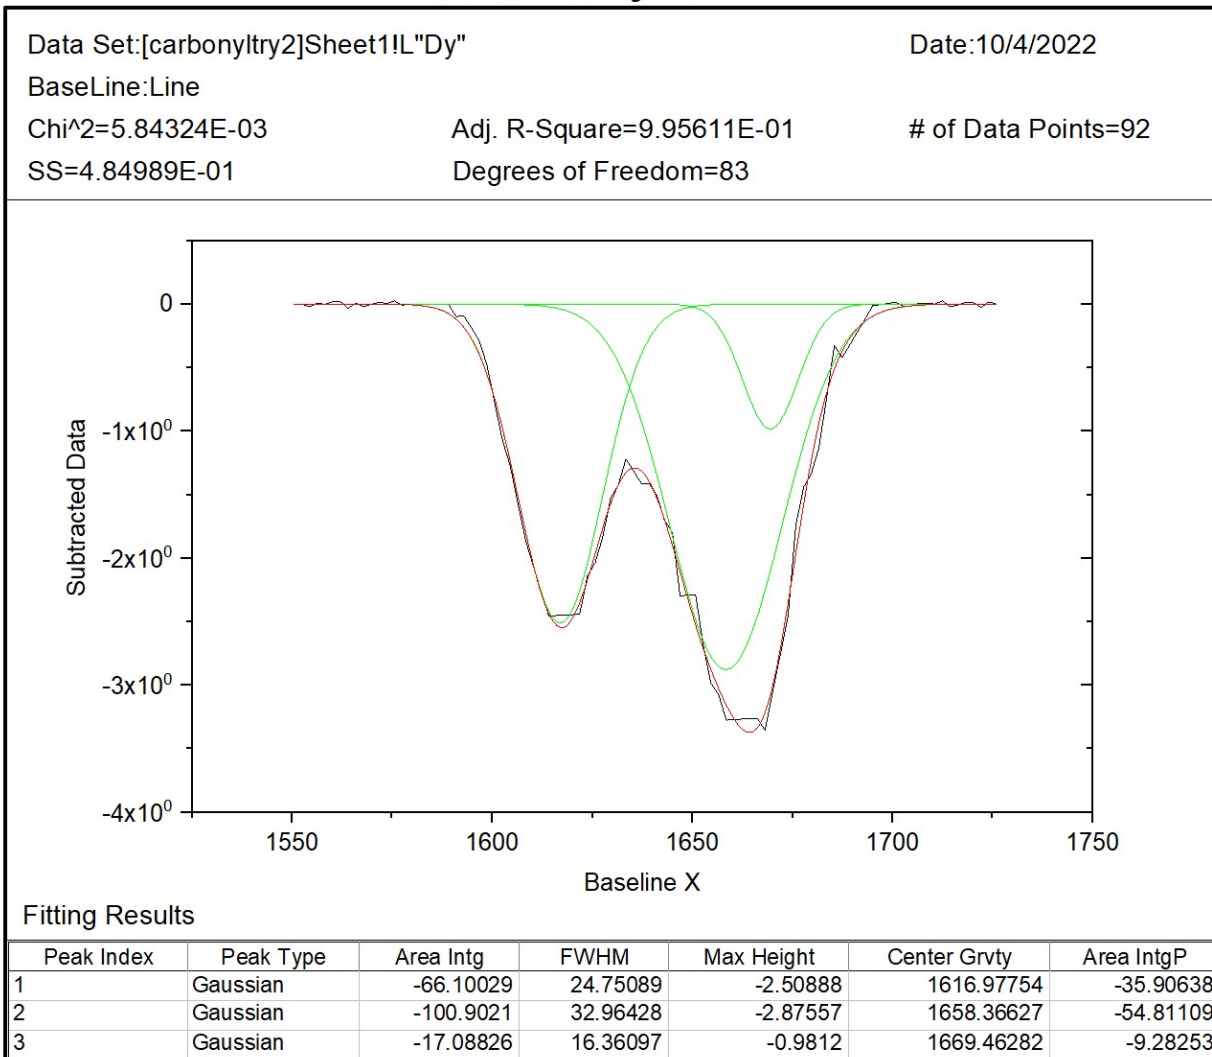

Figure S30. Peak analysis via OriginLab for 0.04 M TODGA in n-dodecane without phase modifier after contact with 3 mM Dy(NO<sub>3</sub>)<sub>3</sub> in 1 M HNO<sub>3</sub>.

## Peak Analysis

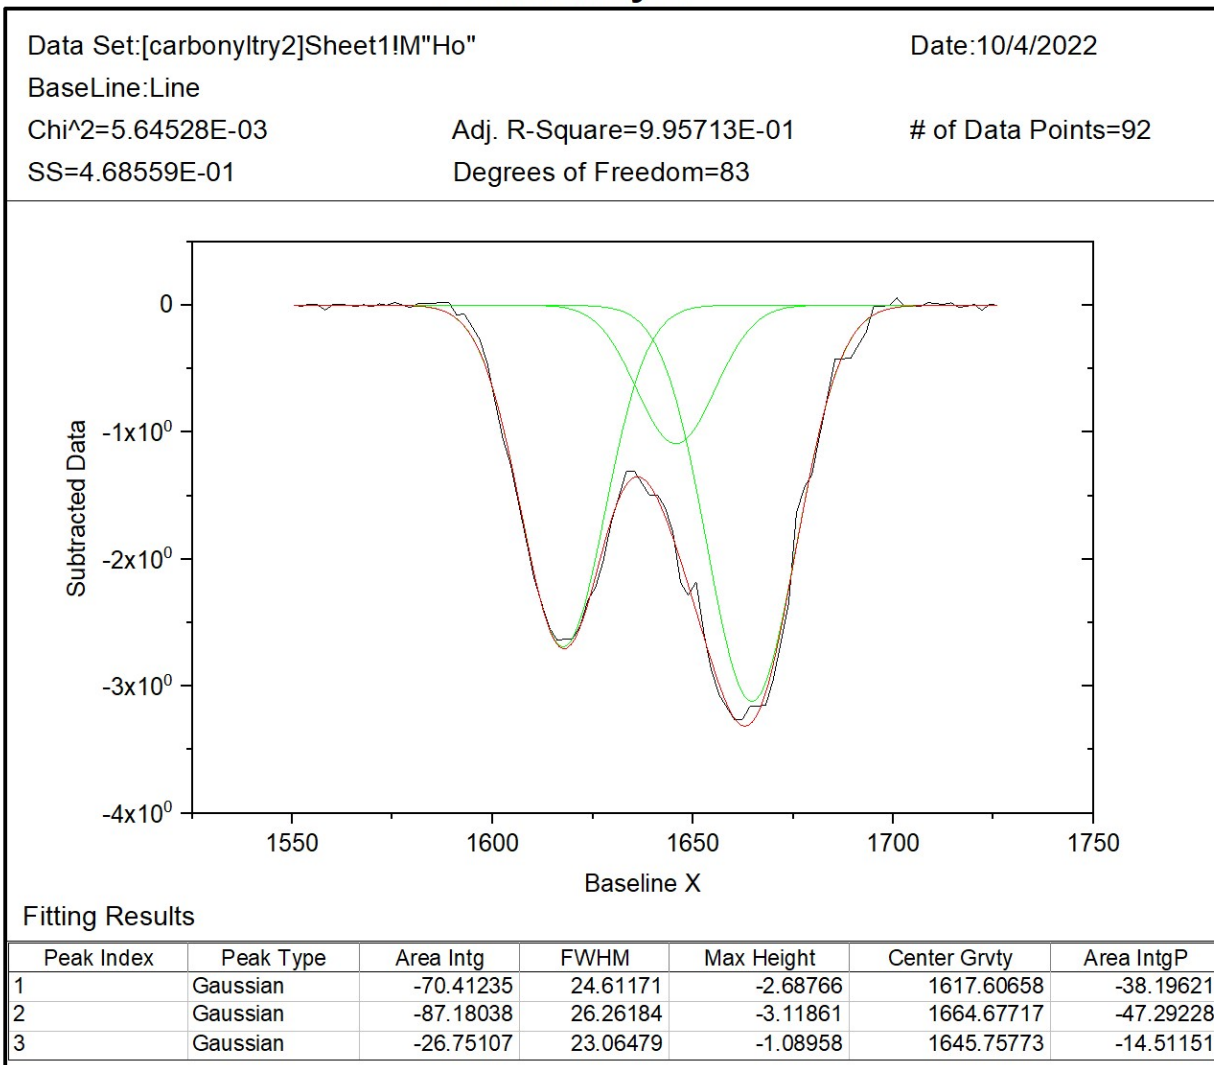

Figure S31. Peak analysis via OriginLab for 0.04 M TODGA in n-dodecane without phase modifier after contact with 3 mM Ho(NO<sub>3</sub>)<sub>3</sub> in 1 M HNO<sub>3</sub>.

## Peak Analysis

Data Set:[carbonyltry2]Sheet1!N"Er"

Date:10/4/2022

BaseLine:Line

Chi^2=5.68279E-03

Adj. R-Square=9.96204E-01

# of Data Points=92

SS=4.71671E-01

Degrees of Freedom=83

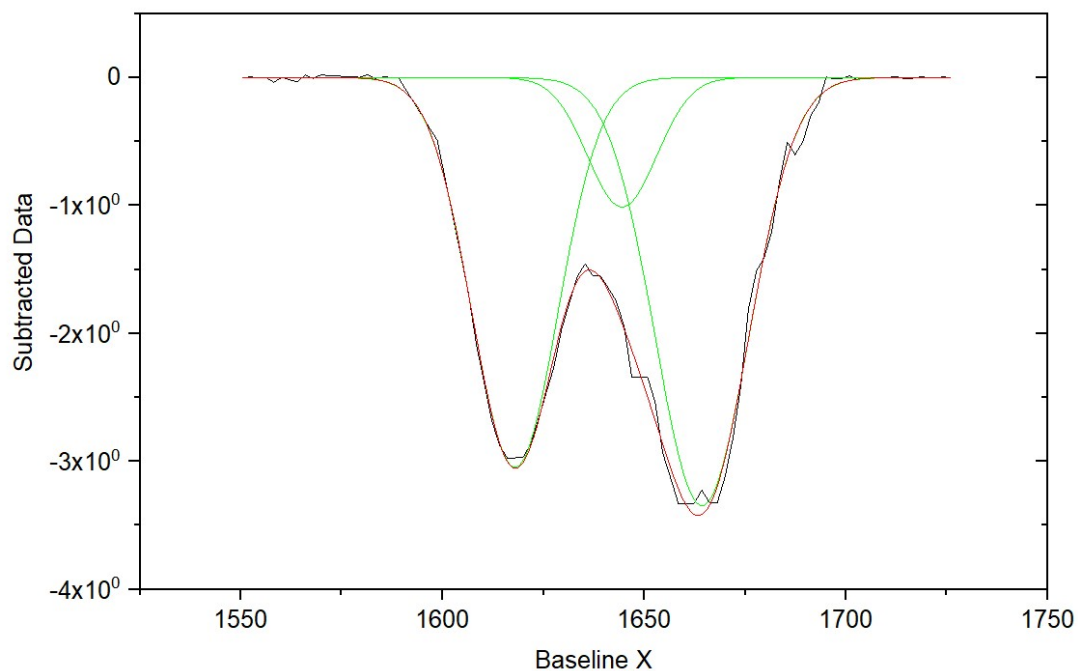

Fitting Results

| Peak Index | Peak Type | Area Intg | FWHM     | Max Height | Center Grvty | Area IntgP |
|------------|-----------|-----------|----------|------------|--------------|------------|
| 1          | Gaussian  | -81.10451 | 25.02037 | -3.04522   | 1617.95068   | -40.54916  |
| 2          | Gaussian  | -21.71276 | 20.17059 | -1.01126   | 1644.51253   | -10.85555  |
| 3          | Gaussian  | -97.19799 | 27.29461 | -3.3454    | 1664.31622   | -48.59529  |

Figure S32. Peak analysis via OriginLab for 0.04 M TODGA in n-dodecane without phase modifier after contact with 3 mM  $\text{Er}(\text{NO}_3)_3$  in 1 M  $\text{HNO}_3$ .



## Peak Analysis

Data Set:[carbonyltr2]Sheet1!O"Tm"

Date:10/4/2022

BaseLine:Line

Chi<sup>2</sup>=1.15197E-02

Adj. R-Square=9.92341E-01

# of Data Points=92

SS=9.90691E-01

Degrees of Freedom=86

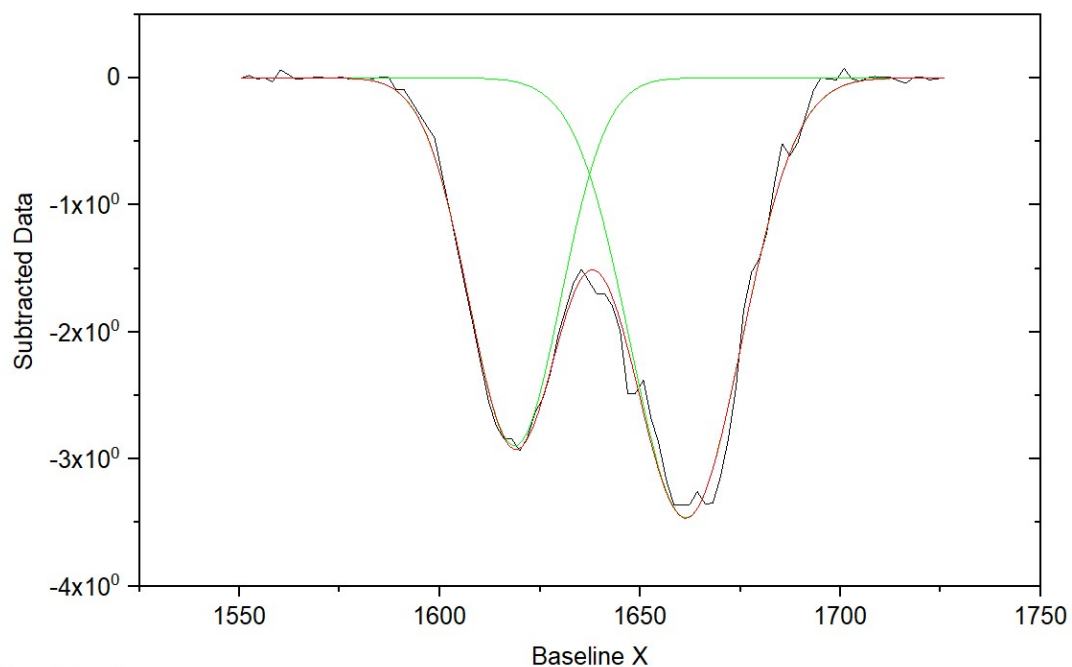

Fitting Results

| Peak Index | Peak Type | Area Intg  | FWHM     | Max Height | Center Grvty | Area IntgP |
|------------|-----------|------------|----------|------------|--------------|------------|
| 1          | Gaussian  | -82.73037  | 26.84889 | -2.89472   | 1618.68471   | -40.84388  |
| 2          | Gaussian  | -119.82232 | 32.5192  | -3.46152   | 1661.41994   | -59.15612  |

Figure S33. Peak analysis via OriginLab for 0.04 M TODGA in n-dodecane without phase modifier after contact with 3 mM Tm(NO<sub>3</sub>)<sub>3</sub> in 1 M HNO<sub>3</sub>.



## Peak Analysis

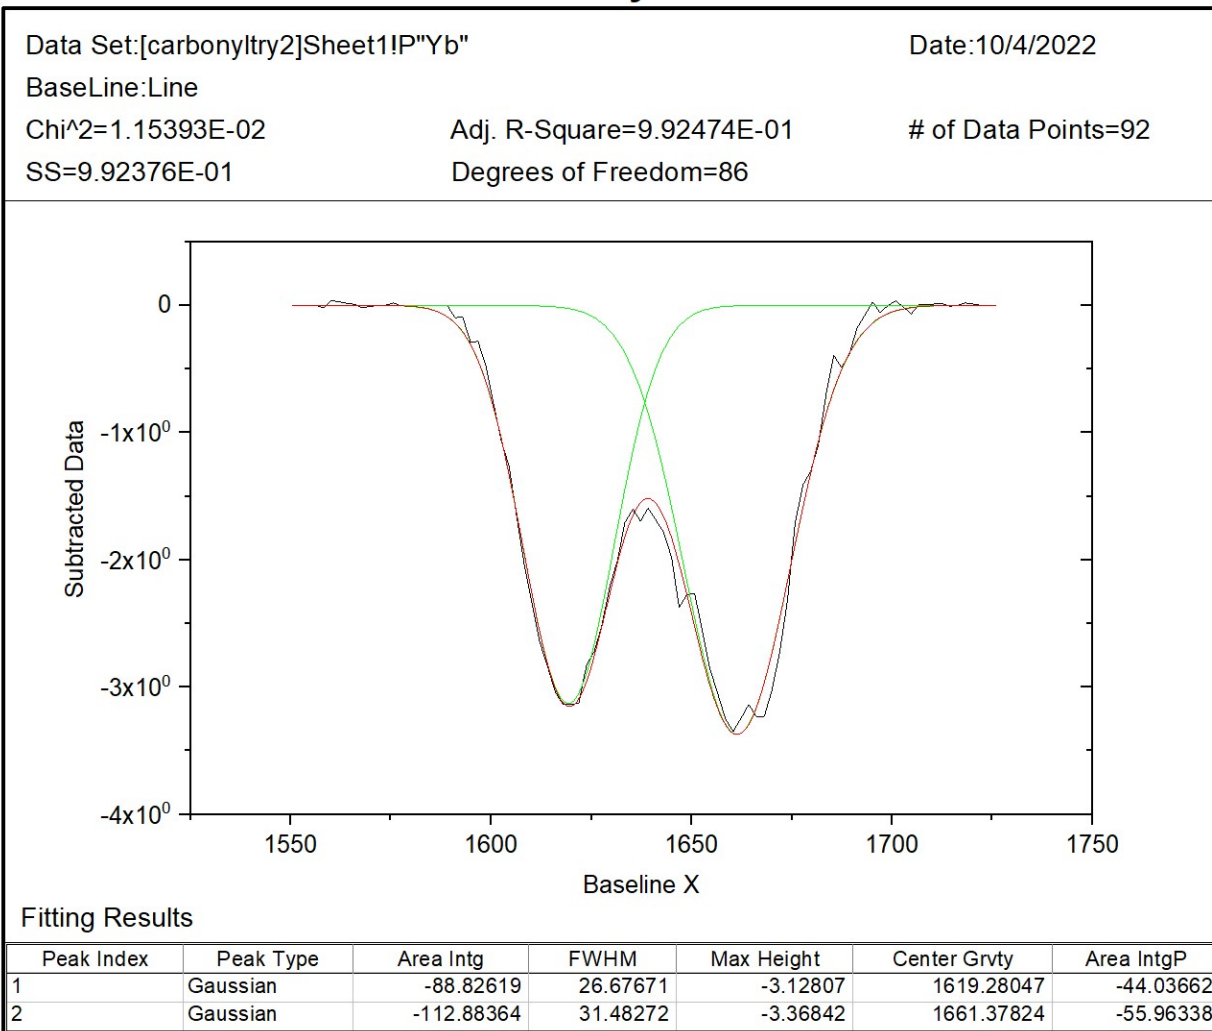

Figure S34. Peak analysis via OriginLab for 0.04 M TODGA in n-dodecane without phase modifier after contact with 3 mM Yb(NO<sub>3</sub>)<sub>3</sub> in 1 M HNO<sub>3</sub>.

## Peak Analysis

Data Set:[carbonyltry2]Sheet1!Q"Lu"

Date:10/4/2022

BaseLine:Line

Chi<sup>2</sup>=1.15210E-02

Adj. R-Square=9.92999E-01

# of Data Points=92

SS=9.90809E-01

Degrees of Freedom=86

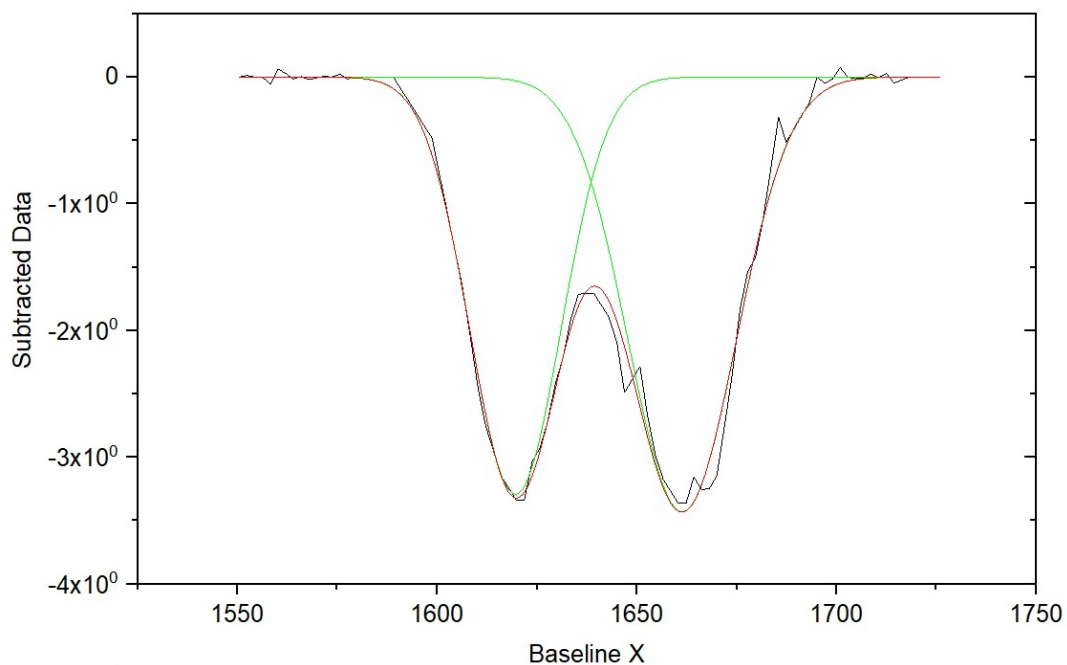

Fitting Results

| Peak Index | Peak Type | Area Intg  | FWHM     | Max Height | Center Grvty | Area IntgP |
|------------|-----------|------------|----------|------------|--------------|------------|
| 1          | Gaussian  | -94.10698  | 26.86457 | -3.29086   | 1619.59009   | -44.71027  |
| 2          | Gaussian  | -116.37483 | 31.88776 | -3.42849   | 1661.3696    | -55.28973  |

Figure S35. Peak analysis via OriginLab for 0.04 M TODGA in n-dodecane without phase modifier after contact with 3 mM Lu(NO<sub>3</sub>)<sub>3</sub> in 1 M HNO<sub>3</sub>.

5 vol% 1-hexanol

## Peak Analysis

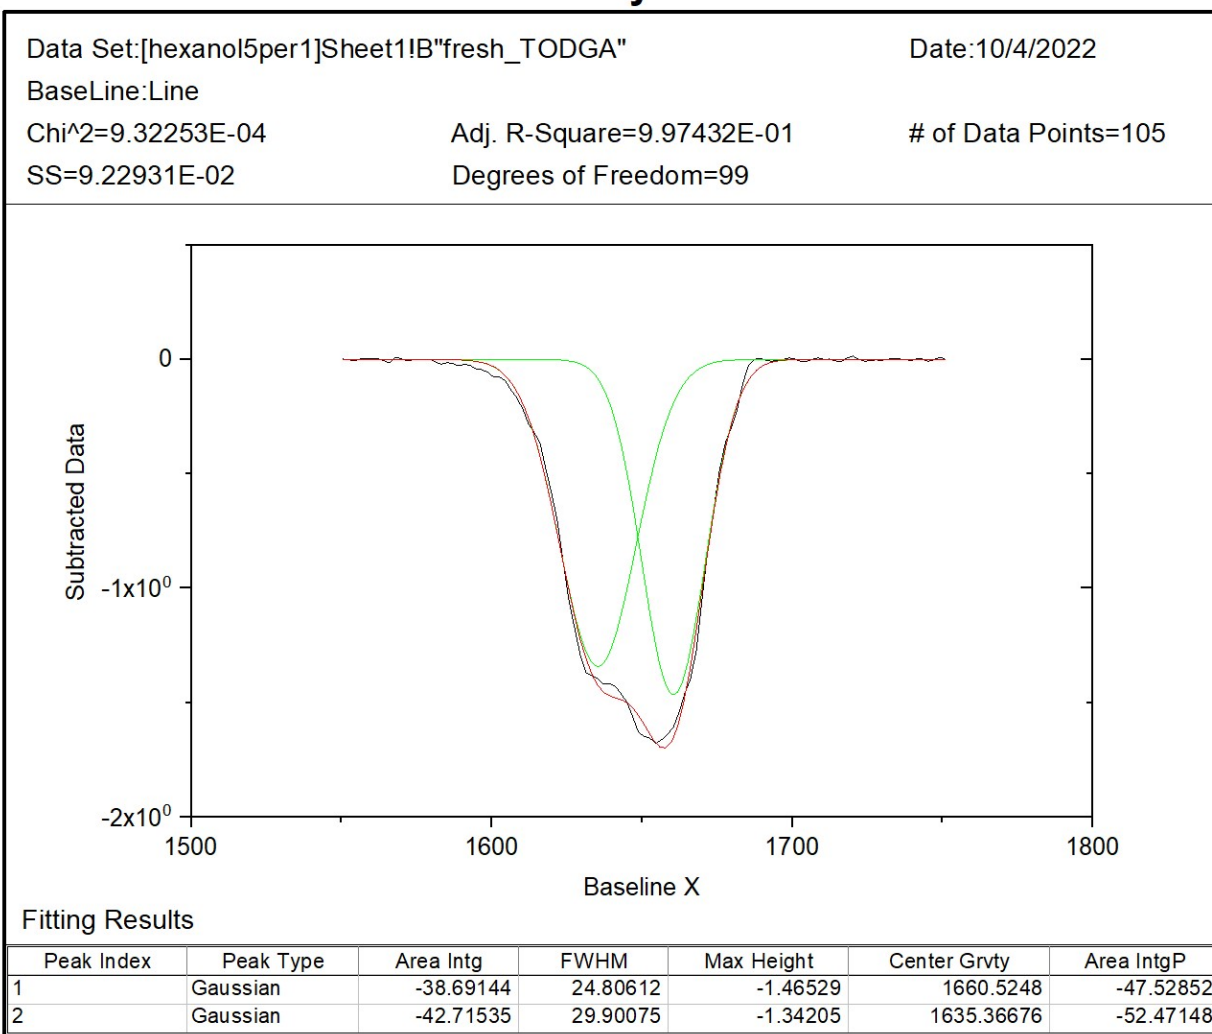

Figure S36. Peak analysis via OriginLab for 0.04 M of fresh TODGA with 5 vol% 1-hexanol in n-dodecane.

## Peak Analysis

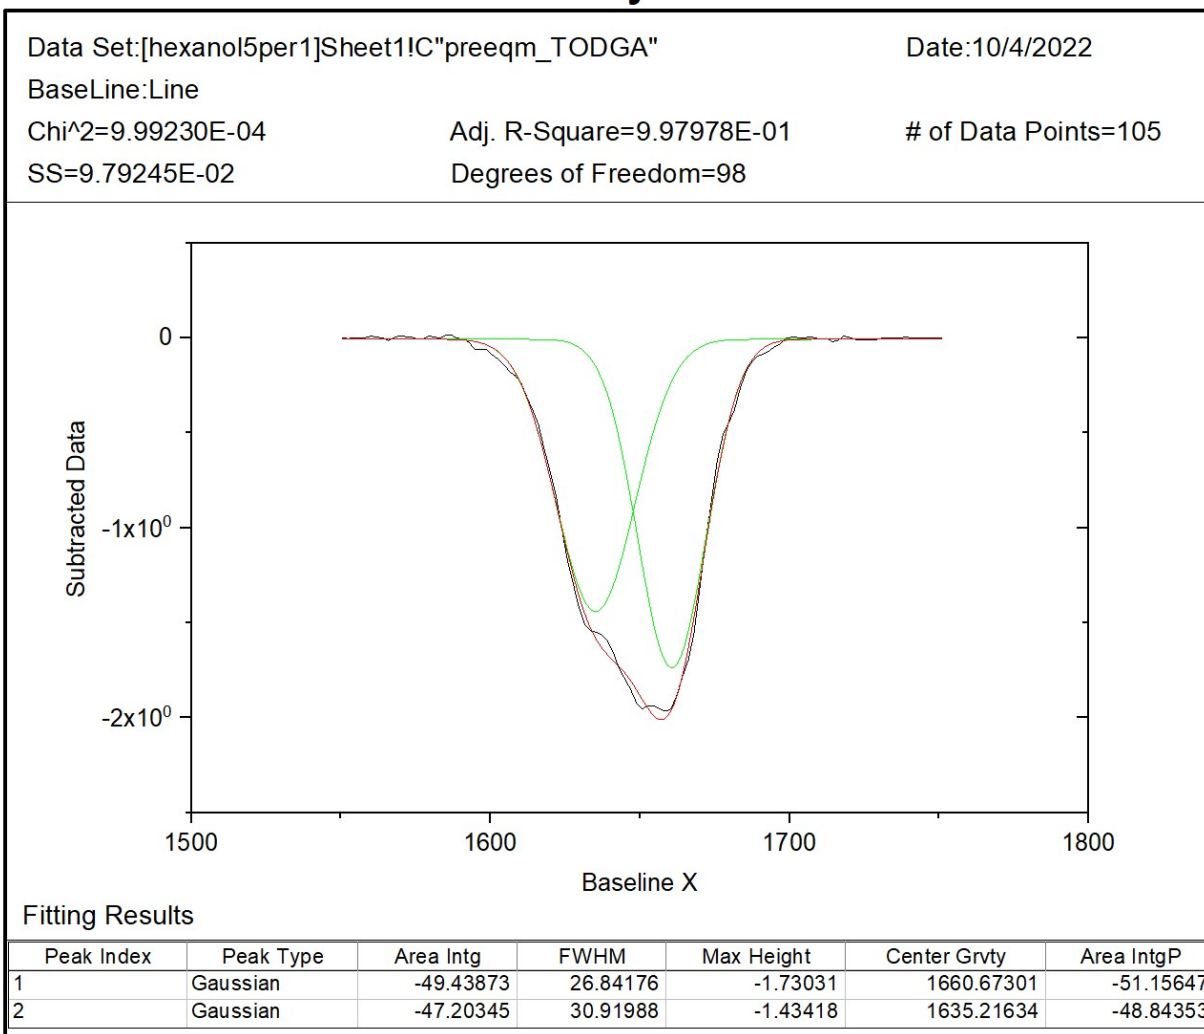

Figure S37. Peak analysis via OriginLab for 0.04 M TODGA with 5 vol% 1-hexanol in n-dodecane after contact with 1 M HNO<sub>3</sub>.

## Peak Analysis

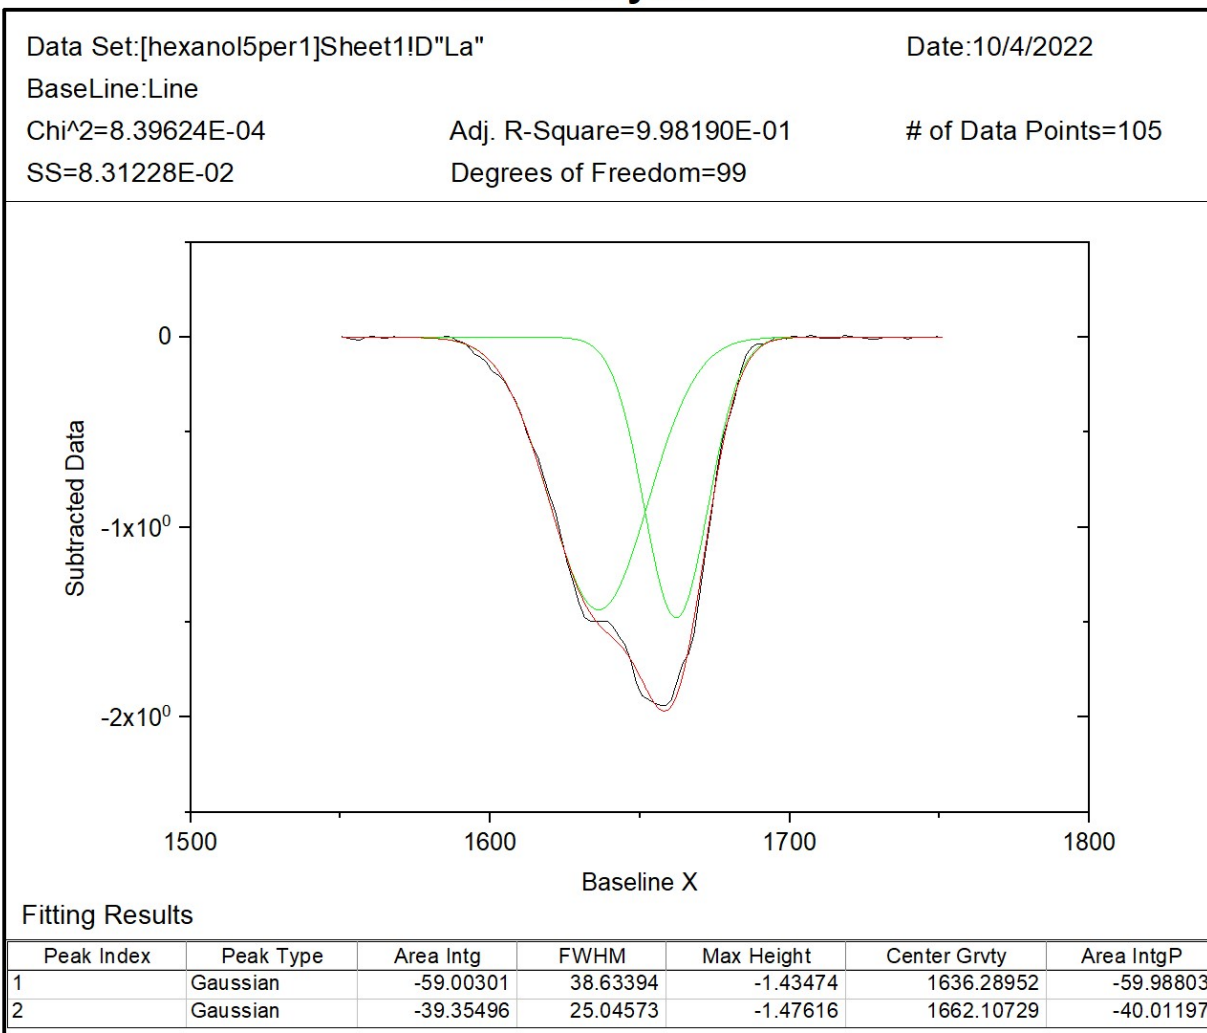

Figure S38. Peak analysis via OriginLab for 0.04 M TODGA with 5 vol% 1-hexanol in n-dodecane after contact with 3 mM  $\text{La}(\text{NO}_3)_3$  in 1 M  $\text{HNO}_3$ .

## Peak Analysis

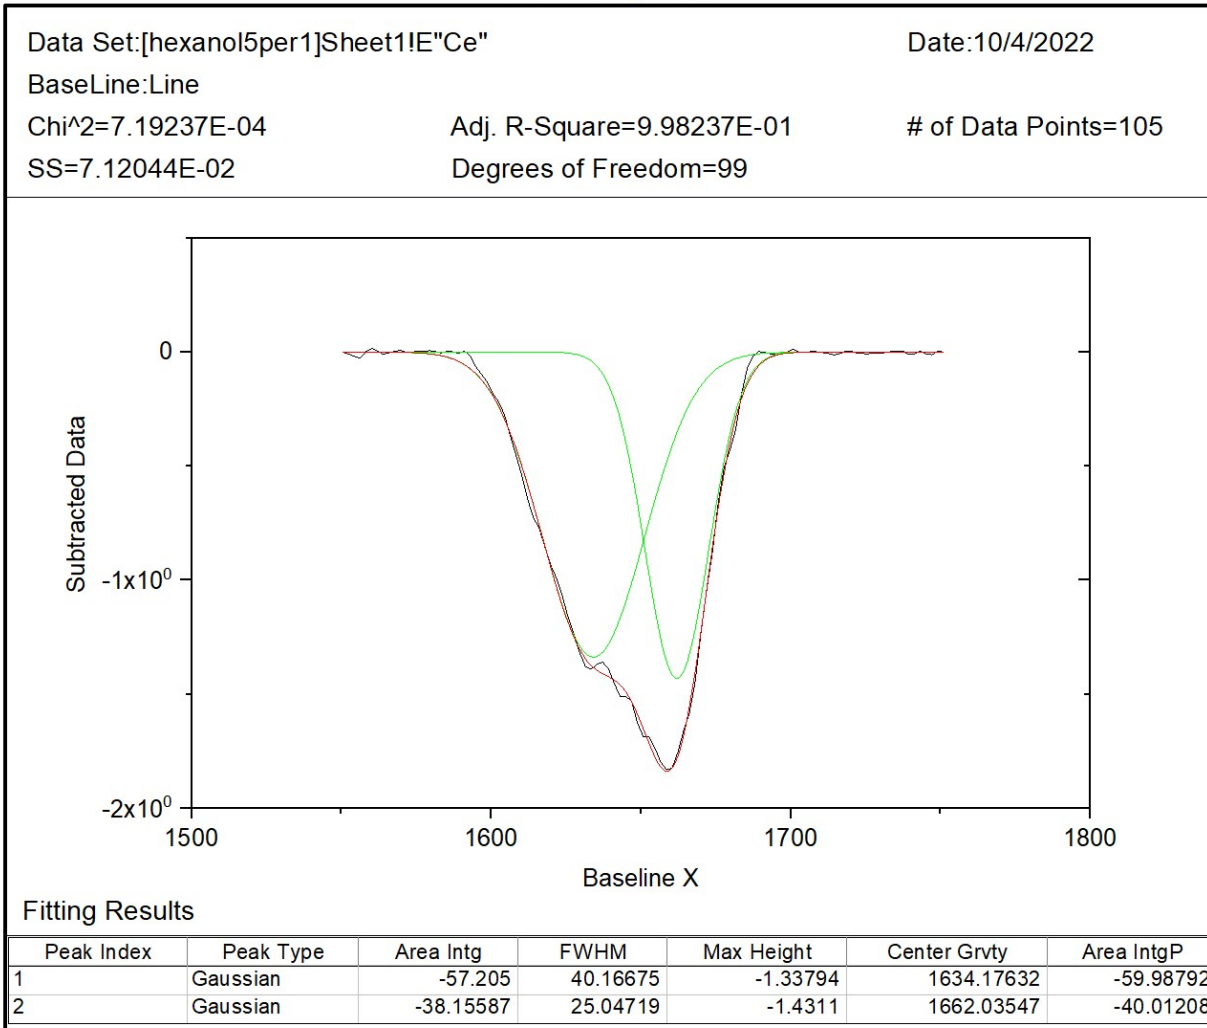

Figure S39. Peak analysis via OriginLab for 0.04 M TODGA with 5 vol% 1-hexanol in n-dodecane after contact with 3 mM Ce(NO<sub>3</sub>)<sub>3</sub> in 1 M HNO<sub>3</sub>.

## Peak Analysis

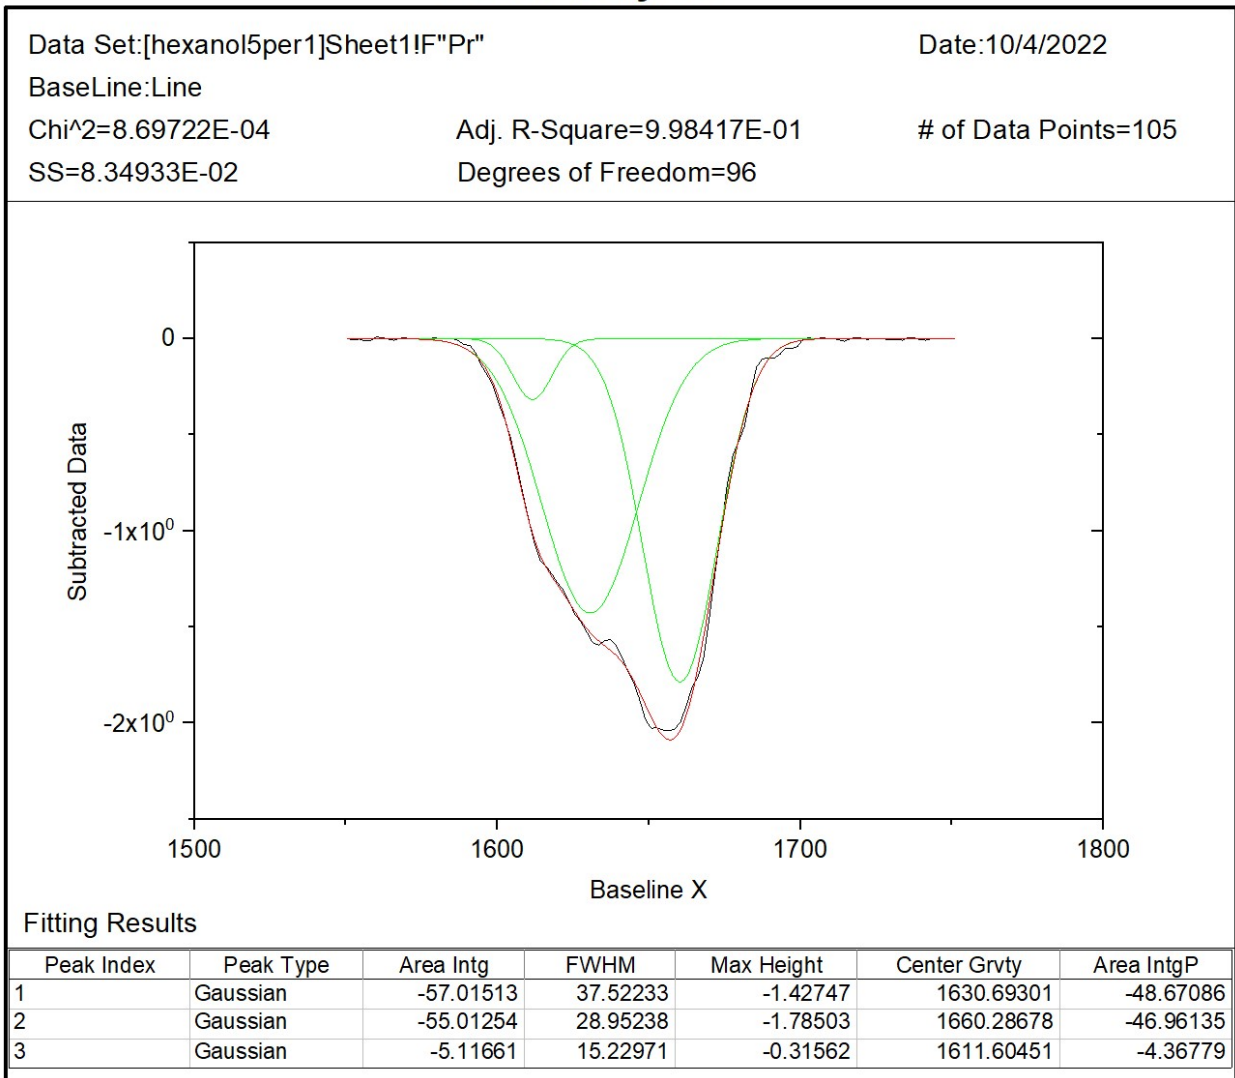

Figure S40. Peak analysis via OriginLab for 0.04 M TODGA with 5 vol% 1-hexanol in n-dodecane after contact with 3 mM  $\text{Pr}(\text{NO}_3)_3$  in 1 M  $\text{HNO}_3$ .

## Peak Analysis

Data Set:[hexanol5per1]Sheet1!G"Nd"

Date:10/4/2022

BaseLine:Line

Chi^2=1.24262E-03

Adj. R-Square=9.97369E-01

# of Data Points=105

SS=1.19292E-01

Degrees of Freedom=96

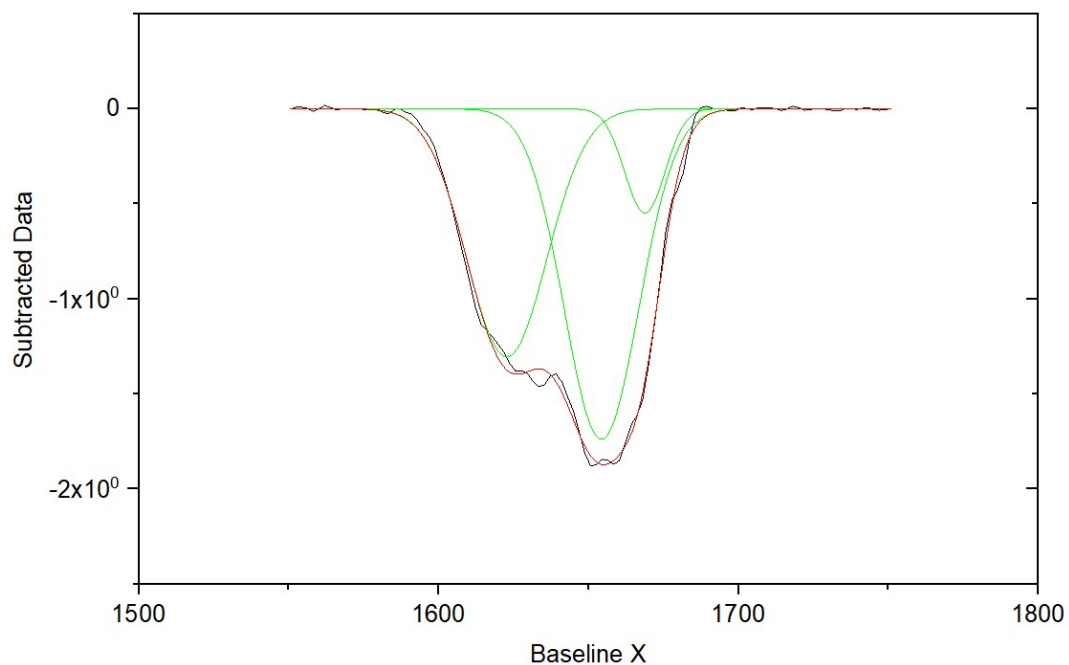

### Fitting Results

| Peak Index | Peak Type | Area Intg | FWHM     | Max Height | Center Grvty | Area IntgP |
|------------|-----------|-----------|----------|------------|--------------|------------|
| 1          | Gaussian  | -43.61843 | 31.3759  | -1.306     | 1622.75664   | -40.76738  |
| 2          | Gaussian  | -54.13714 | 29.23819 | -1.73945   | 1654.3399    | -50.59855  |
| 3          | Gaussian  | -9.23789  | 15.81969 | -0.54858   | 1668.8237    | -8.63407   |

Figure S41. Peak analysis via OriginLab for 0.04 M TODGA with 5 vol% 1-hexanol in n-dodecane after contact with 3 mM  $\text{Nd}(\text{NO}_3)_3$  in 1 M  $\text{HNO}_3$ .



## Peak Analysis

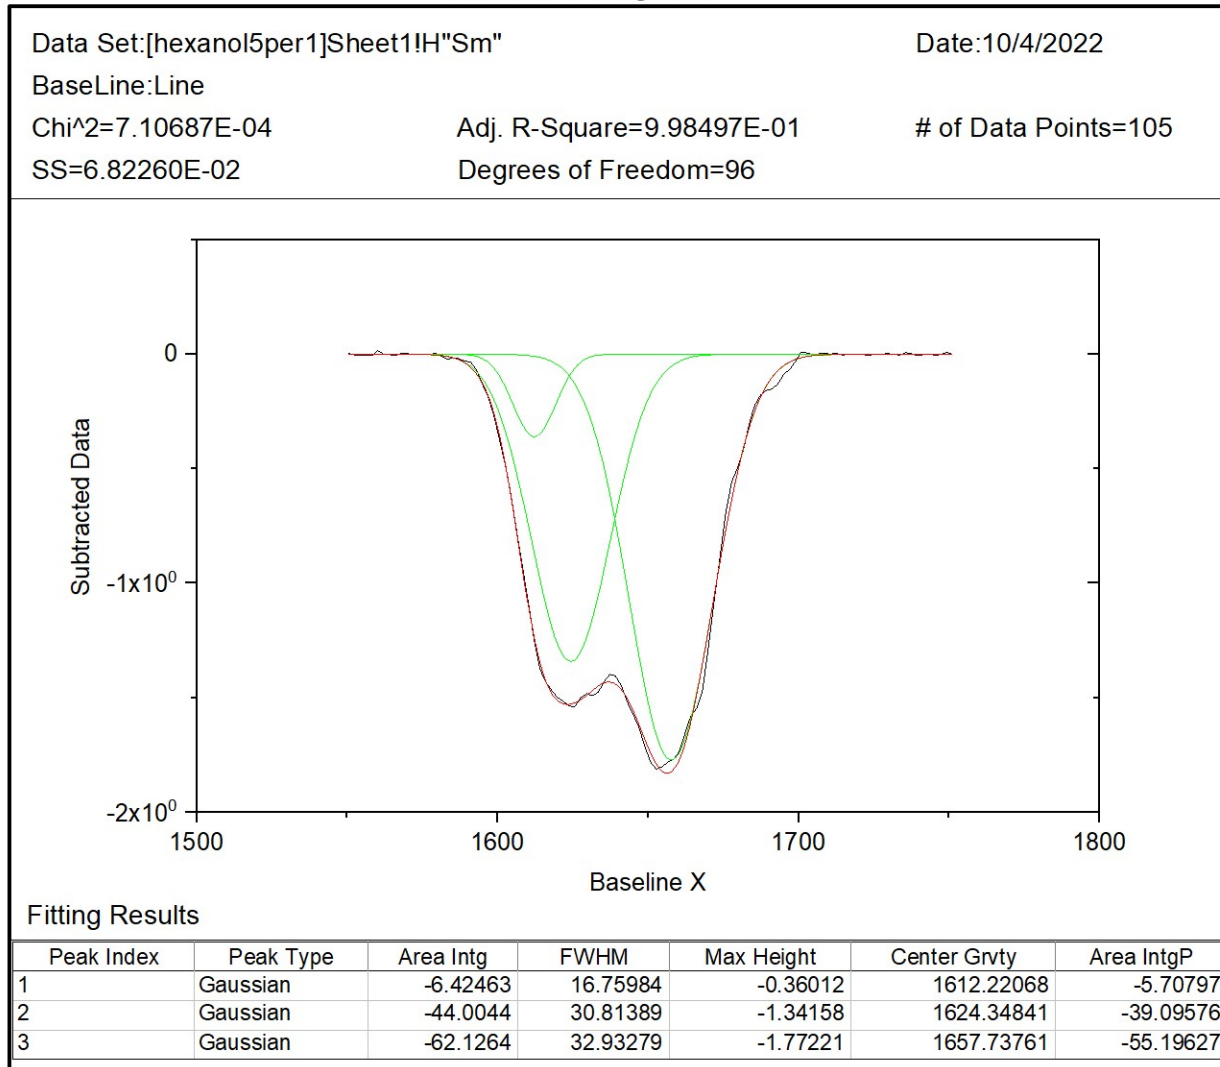

Figure S42. Peak analysis via OriginLab for 0.04 M TODGA with 5 vol% 1-hexanol in n-dodecane after contact with 3 mM  $\text{Sm}(\text{NO}_3)_3$  in 1 M  $\text{HNO}_3$ .

## Peak Analysis

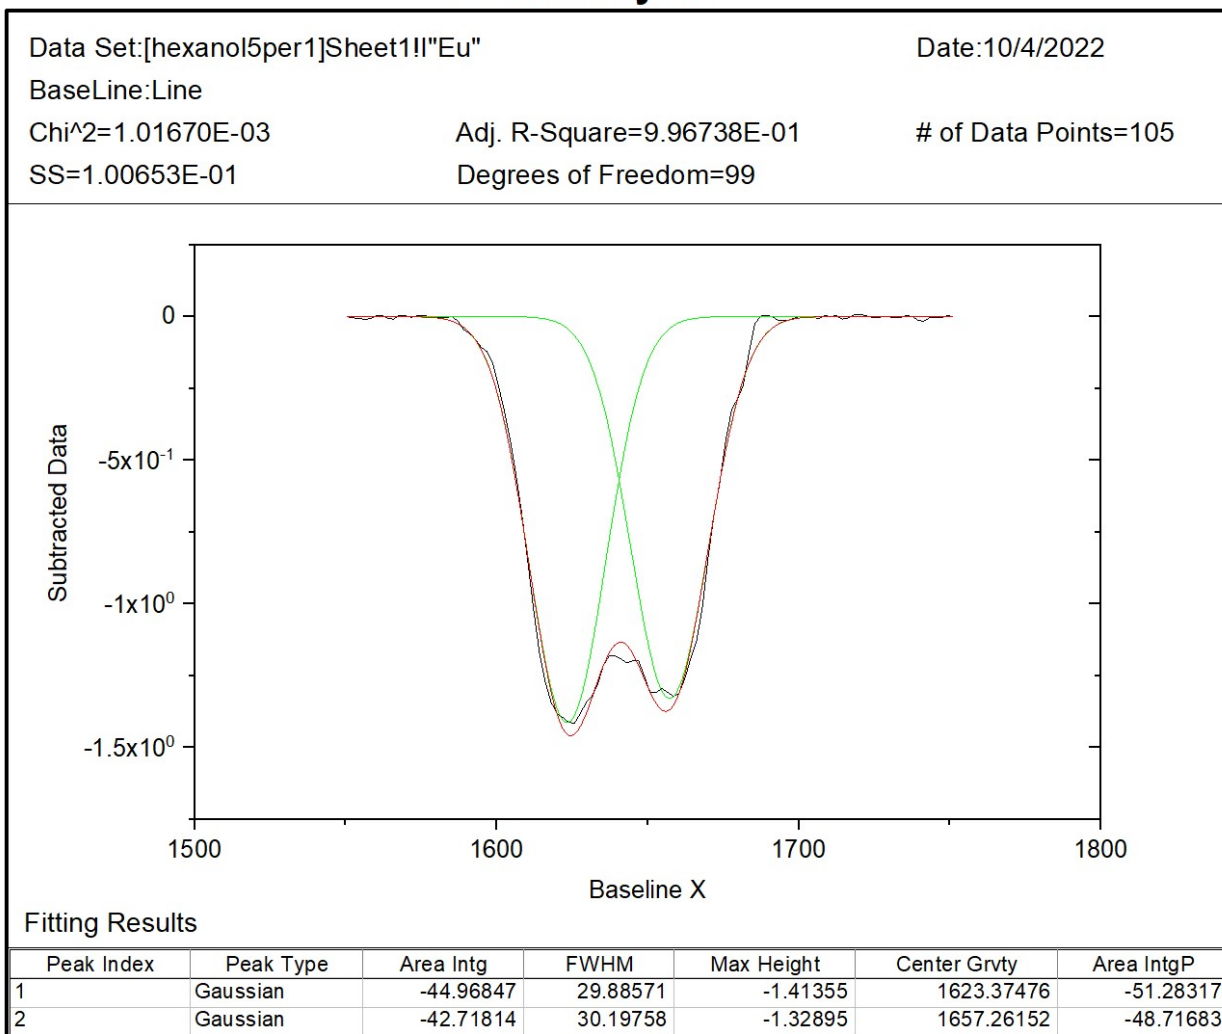

Figure 43. Peak analysis via OriginLab for 0.04 M TODGA with 5 vol% 1-hexanol in n-dodecane after contact with 3 mM  $\text{Eu}(\text{NO}_3)_3$  in 1 M  $\text{HNO}_3$ .

## Peak Analysis

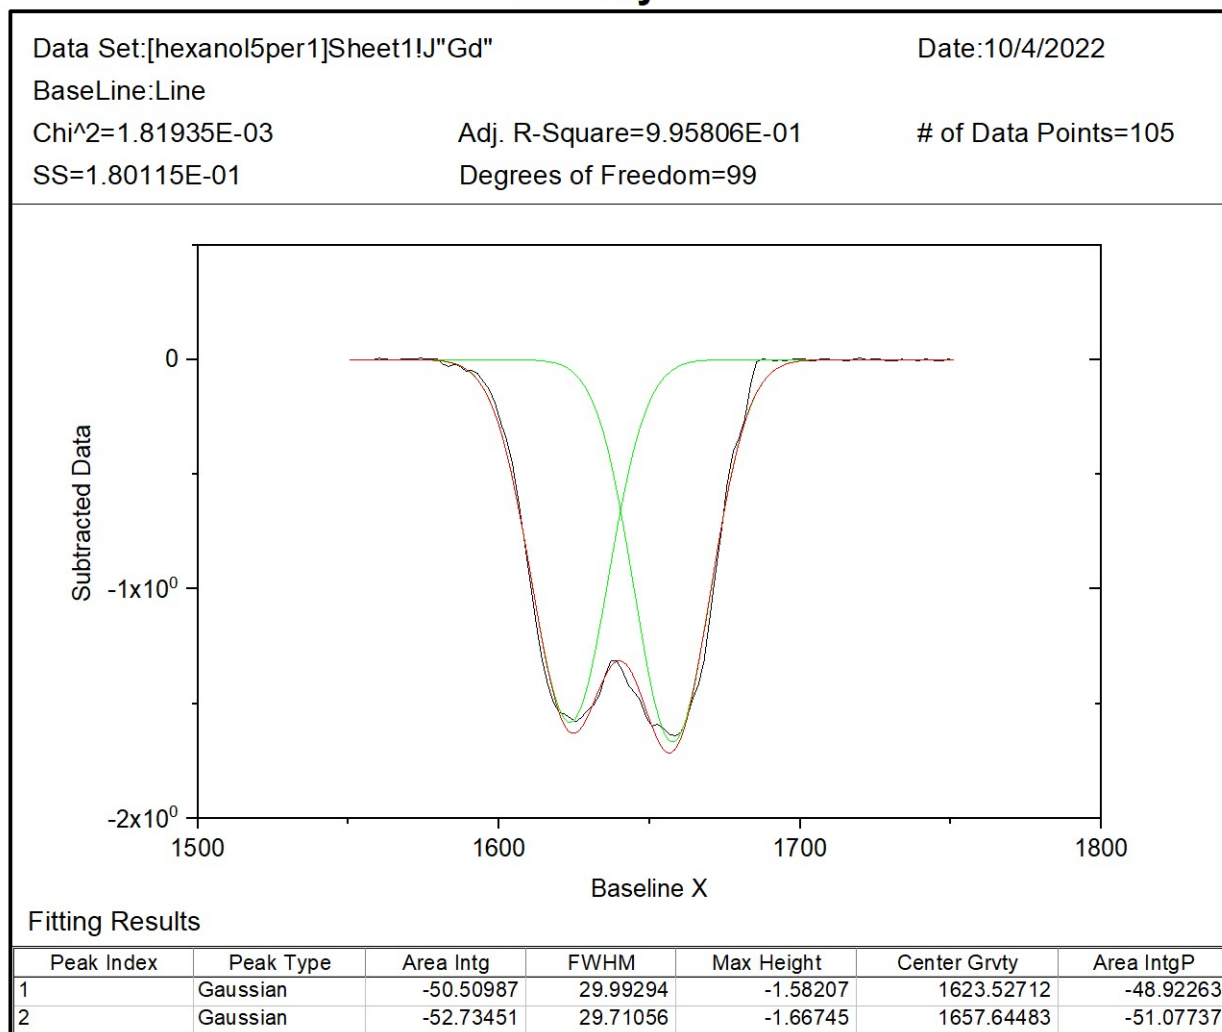

Figure S44. Peak analysis via OriginLab for 0.04 M TODGA with 5 vol% 1-hexanol in n-dodecane after contact with 3 mM  $\text{Gd}(\text{NO}_3)_3$  in 1 M  $\text{HNO}_3$ .

## Peak Analysis

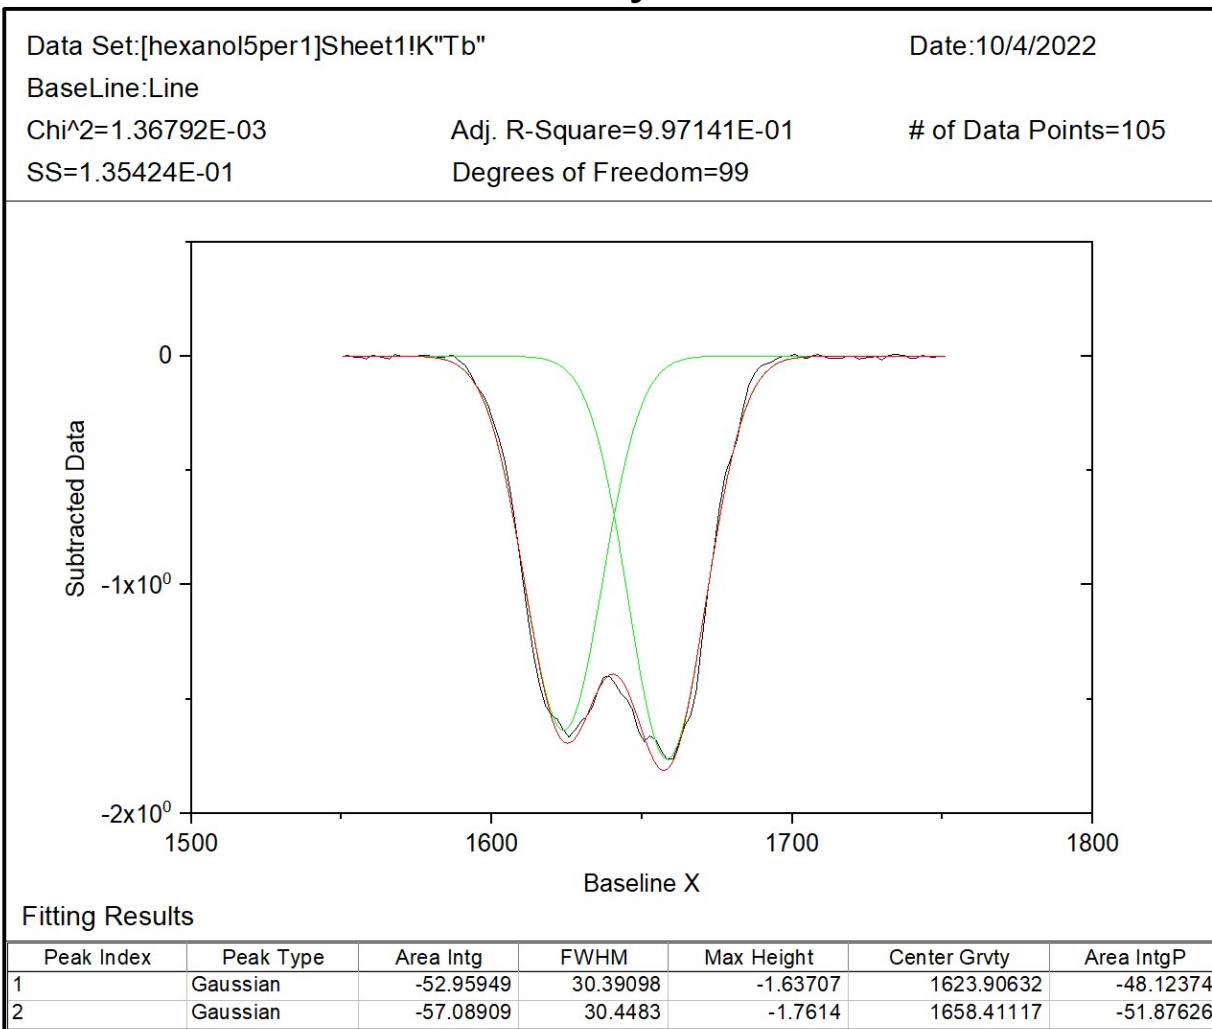

Figure S45. Peak analysis via OriginLab for 0.04 M TODGA with 5 vol% 1-hexanol in n-dodecane after contact with 3 mM Tb(NO<sub>3</sub>)<sub>3</sub> in 1 M HNO<sub>3</sub>.

## Peak Analysis

Data Set:[hexanol5per1]Sheet1!L"Dy"

Date:10/4/2022

BaseLine:Line

Chi<sup>2</sup>=1.34496E-03

Adj. R-Square=9.96621E-01

# of Data Points=105

SS=1.33151E-01

Degrees of Freedom=99

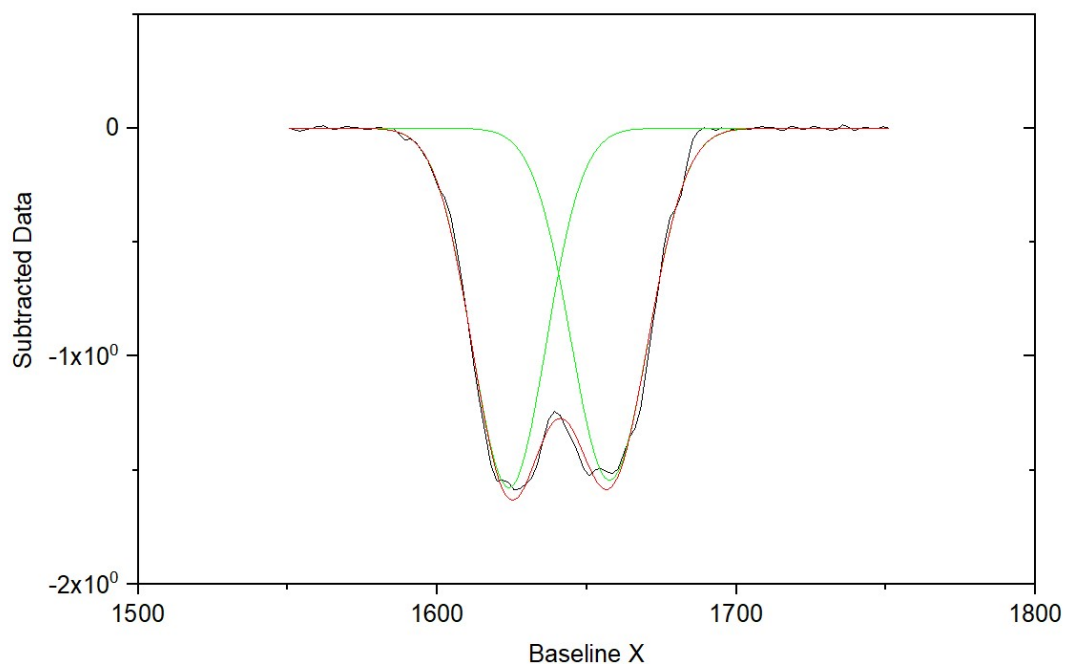

Fitting Results

| Peak Index | Peak Type | Area Intg | FWHM     | Max Height | Center Grvty | Area IntgP |
|------------|-----------|-----------|----------|------------|--------------|------------|
| 1          | Gaussian  | -48.66375 | 28.99321 | -1.5768    | 1623.98277   | -49.4949   |
| 2          | Gaussian  | -49.65698 | 30.20971 | -1.54419   | 1657.64288   | -50.5051   |

Figure S46. Peak analysis via OriginLab for 0.04 M TODGA with 5 vol% 1-hexanol in n-dodecane after contact with 3 mM Dy(NO<sub>3</sub>)<sub>3</sub> in 1 M HNO<sub>3</sub>.

## Peak Analysis

Data Set:[hexanol5per1]Sheet1!M"Ho"

Date:10/4/2022

BaseLine:Line

Chi<sup>2</sup>=1.30872E-03

Adj. R-Square=9.96727E-01

# of Data Points=105

SS=1.29564E-01

Degrees of Freedom=99

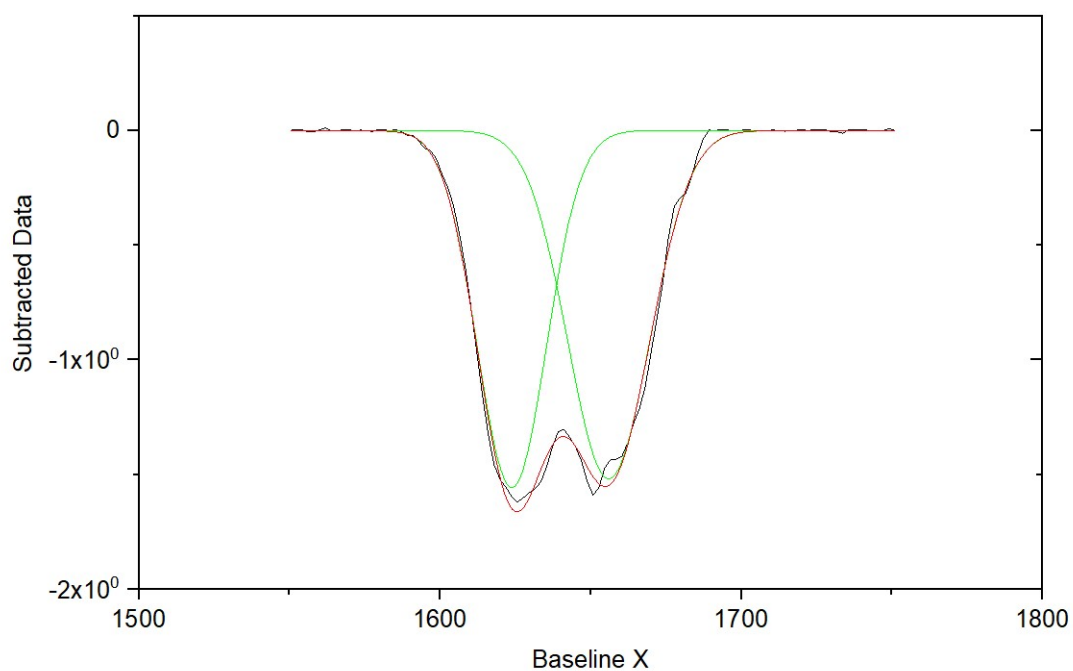

Fitting Results

| Peak Index | Peak Type | Area Intg | FWHM     | Max Height | Center Grvty | Area IntgP |
|------------|-----------|-----------|----------|------------|--------------|------------|
| 1          | Gaussian  | -44.81345 | 27.03191 | -1.5574    | 1623.83199   | -46.4112   |
| 2          | Gaussian  | -51.74395 | 32.00509 | -1.51883   | 1656.01307   | -53.5888   |

Figure S47. Peak analysis via OriginLab for 0.04 M TODGA with 5 vol% 1-hexanol in n-dodecane after contact with 3 mM Ho(NO<sub>3</sub>)<sub>3</sub> in 1 M HNO<sub>3</sub>.

## Peak Analysis

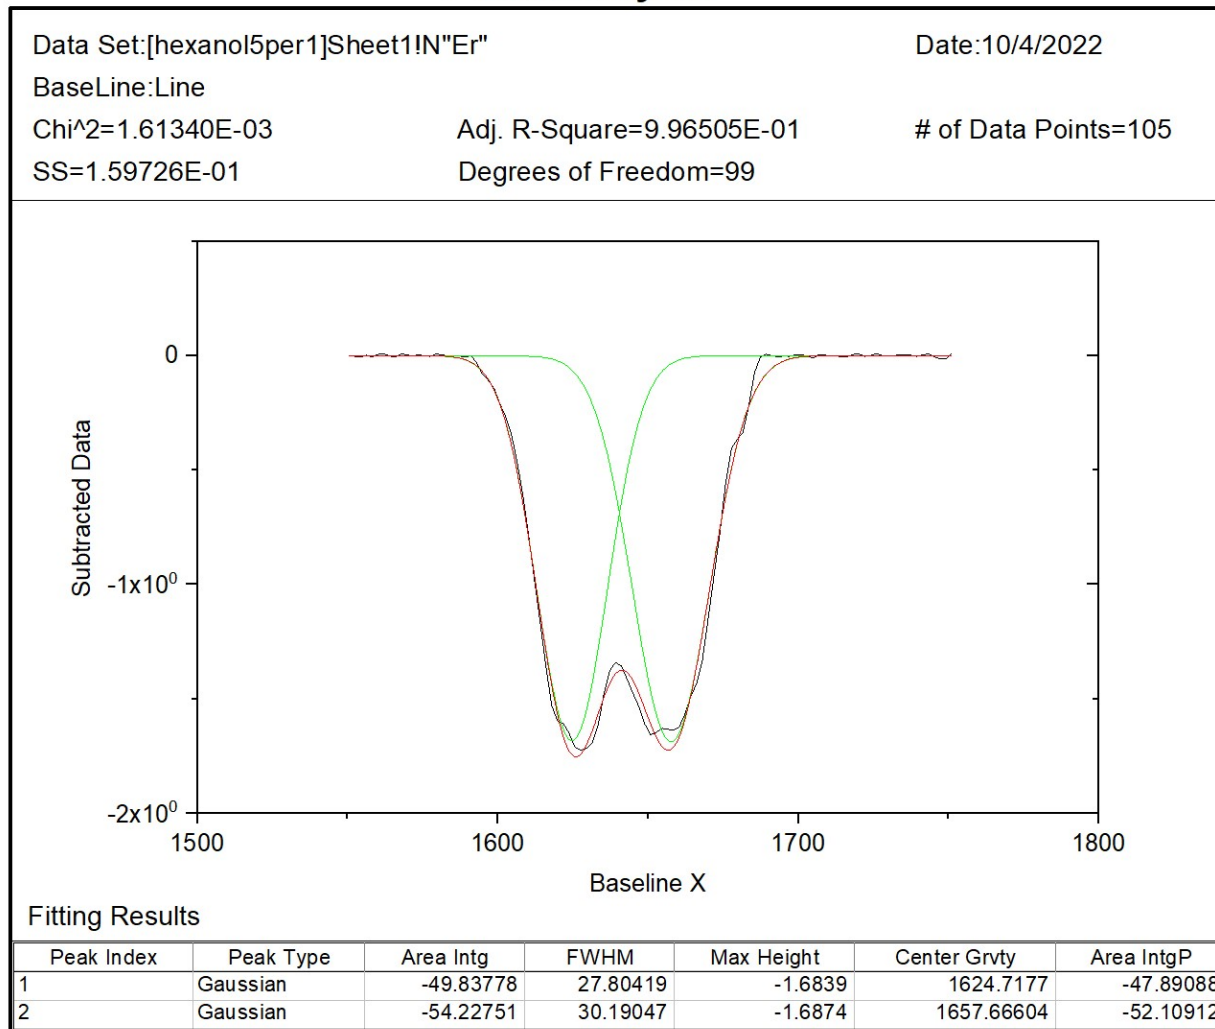

Figure S48. Peak analysis via OriginLab for 0.04 M TODGA with 5 vol% 1-hexanol in n-dodecane after contact with 3 mM Er(NO<sub>3</sub>)<sub>3</sub> in 1 M HNO<sub>3</sub>.

## Peak Analysis

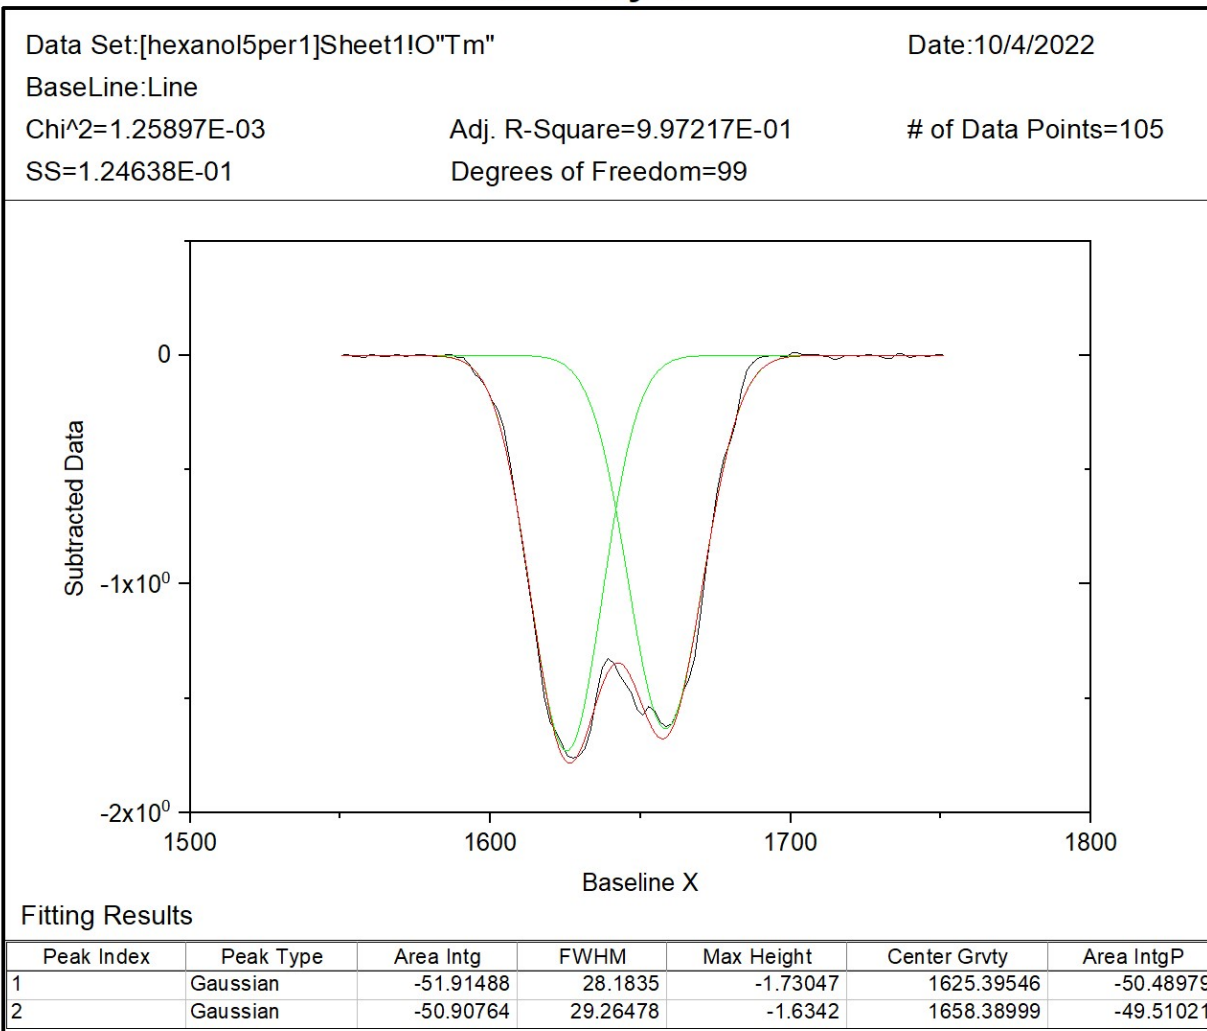

Figure S49. Peak analysis via OriginLab for 0.04 M TODGA with 5 vol% 1-hexanol in n-dodecane after contact with 3 mM Tm(NO<sub>3</sub>)<sub>3</sub> in 1 M HNO<sub>3</sub>.



## Peak Analysis

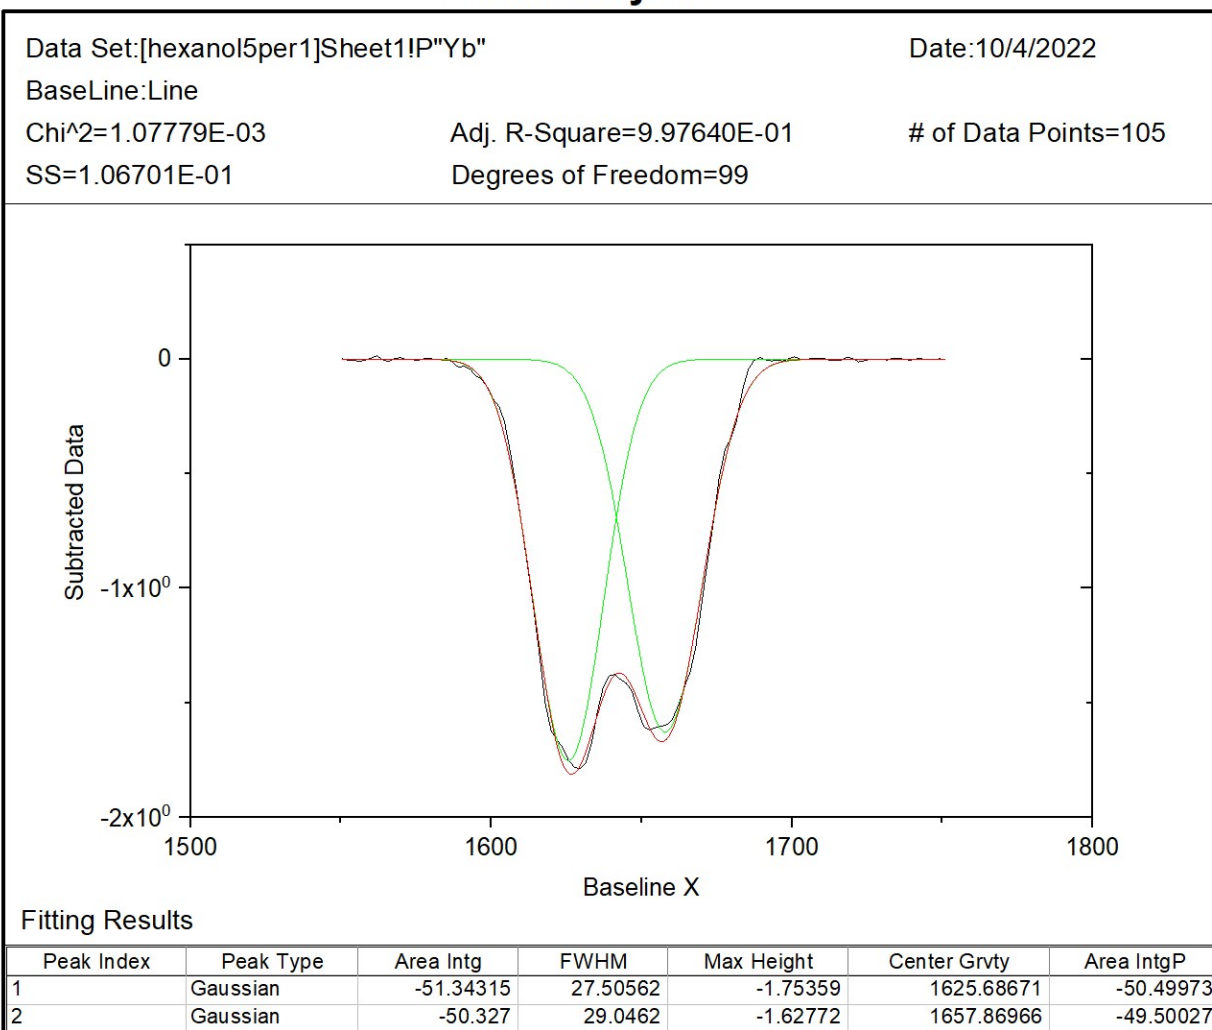

Figure S50. Peak analysis via OriginLab for 0.04 M TODGA with 5 vol% 1-hexanol in n-dodecane after contact with 3 mM  $\text{Yb}(\text{NO}_3)_3$  in 1 M  $\text{HNO}_3$ .

## Peak Analysis

Data Set:[hexanol5per1]Sheet1!Q"Lu"

Date:10/4/2022

BaseLine:Line

Chi<sup>2</sup>=1.24856E-03

Adj. R-Square=9.97273E-01

# of Data Points=105

SS=1.23607E-01

Degrees of Freedom=99

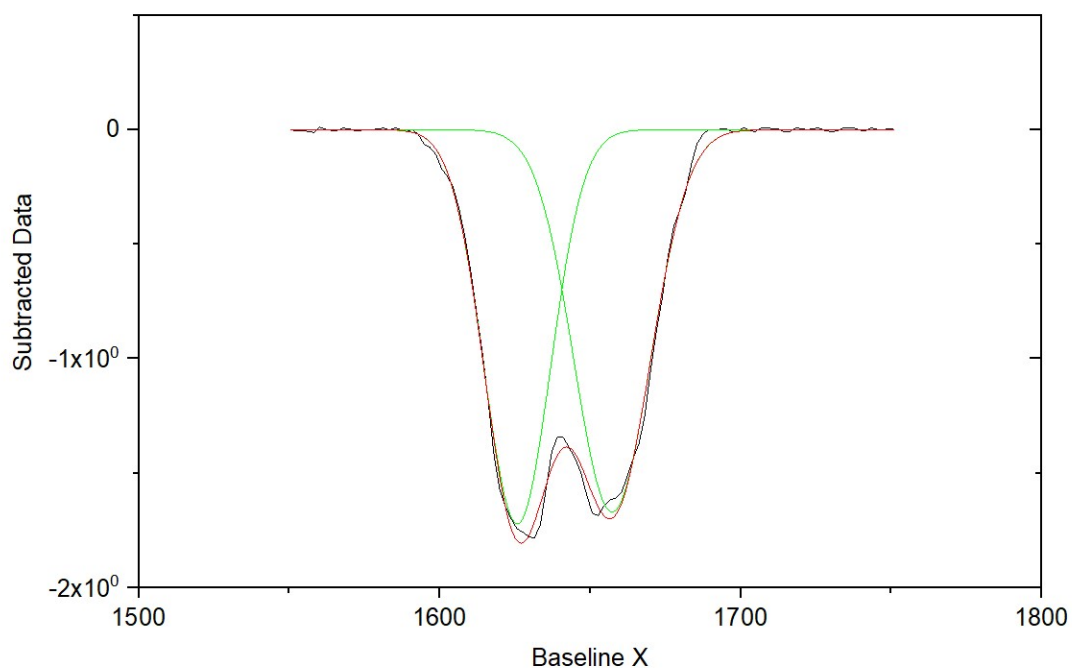

### Fitting Results

| Peak Index | Peak Type | Area Intg | FWHM     | Max Height | Center Grvty | Area IntgP |
|------------|-----------|-----------|----------|------------|--------------|------------|
| 1          | Gaussian  | -47.55578 | 25.9454  | -1.72191   | 1625.78865   | -47.28121  |
| 2          | Gaussian  | -53.02494 | 29.82358 | -1.67028   | 1657.33659   | -52.71879  |

Figure S51. Peak analysis via OriginLab for 0.04 M TODGA with 5 vol% 1-hexanol in n-dodecane after contact with 3 mM Lu(NO<sub>3</sub>)<sub>3</sub> in 1 M HNO<sub>3</sub>.

30 vol% 1-hexanol

## Peak Analysis

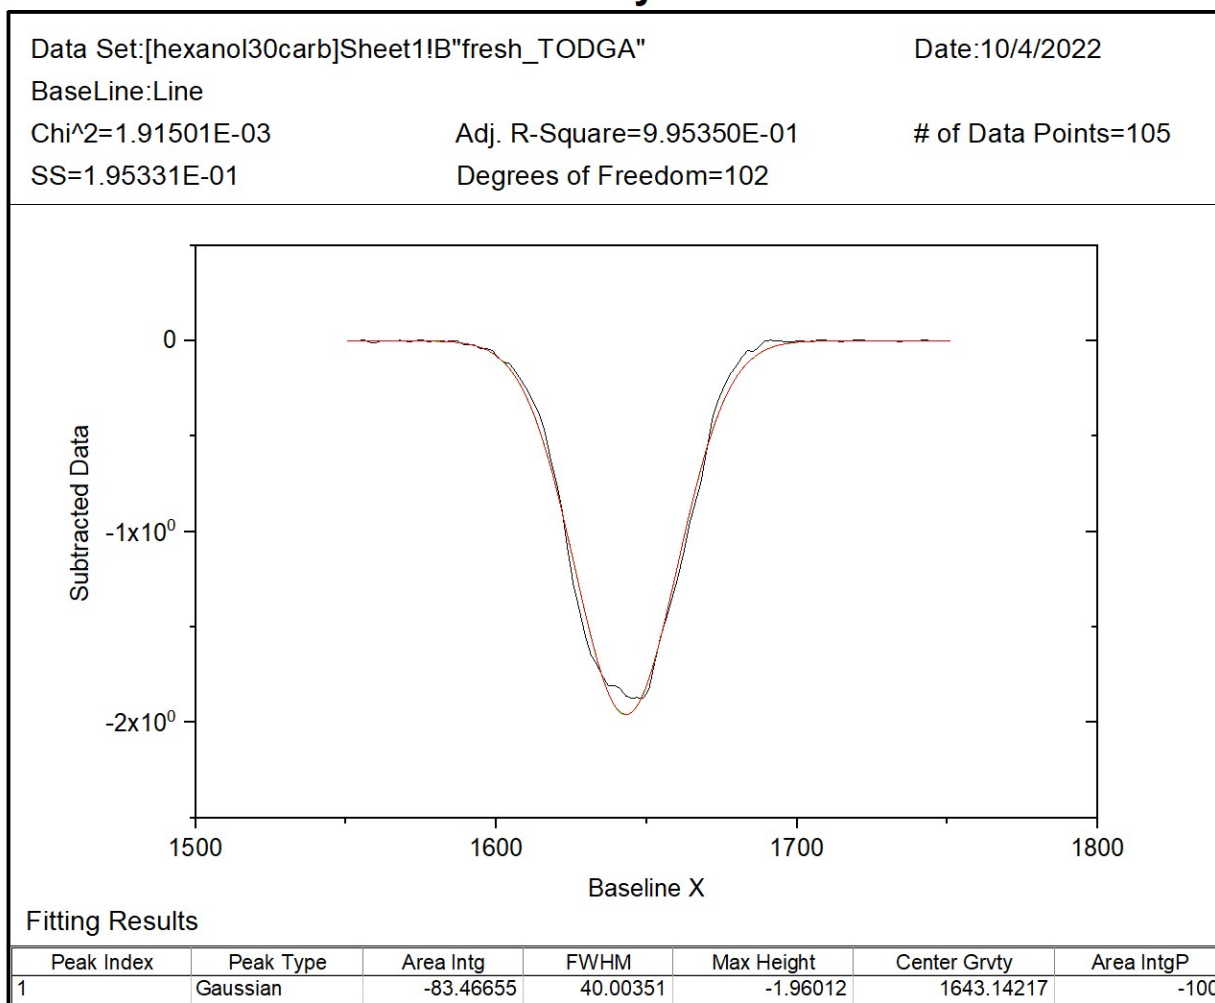

Figure S52. Peak analysis via OriginLab for 0.04 M of fresh TODGA with 30 vol% 1-hexanol in n-dodecane.

## Peak Analysis

Data Set:[hexanol30carb]Sheet1!C"preeqm\_TODGA"

Date:10/4/2022

BaseLine:Line

Chi<sup>2</sup>=9.87863E-04

Adj. R-Square=9.98454E-01

# of Data Points=105

SS=9.77984E-02

Degrees of Freedom=99

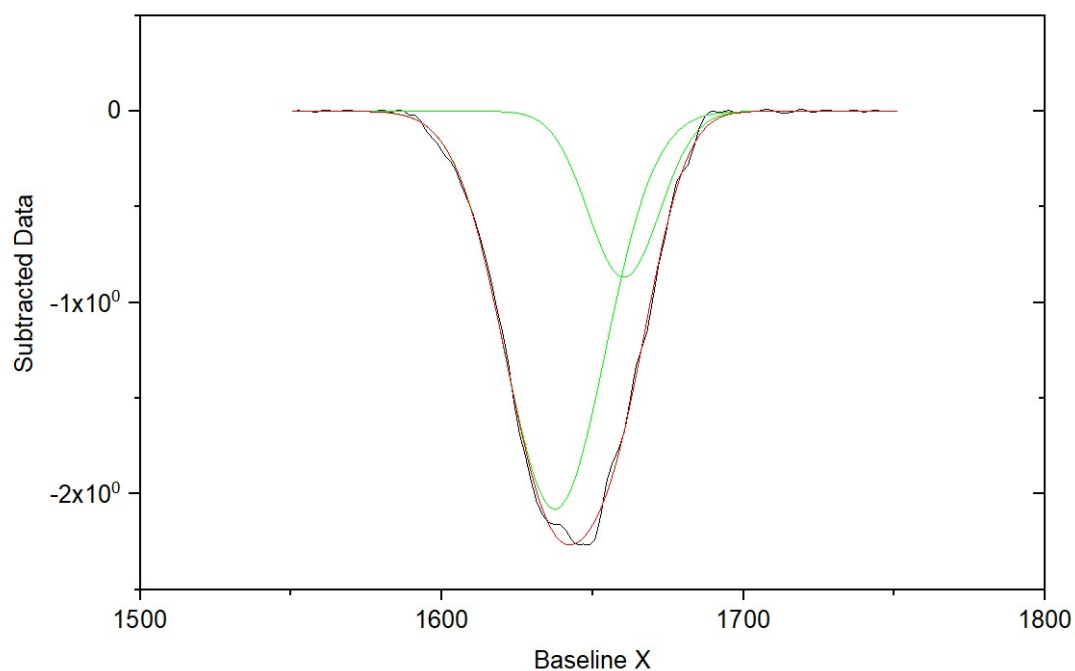

### Fitting Results

| Peak Index | Peak Type | Area Intg | FWHM     | Max Height | Center Grvty | Area IntgP |
|------------|-----------|-----------|----------|------------|--------------|------------|
| 1          | Gaussian  | -25.78328 | 27.90002 | -0.86816   | 1660.375     | -22.92251  |
| 2          | Gaussian  | -86.69687 | 39.17924 | -2.07881   | 1637.54039   | -77.07749  |

Figure S53. Peak analysis via OriginLab for 0.04 M TODGA with 30 vol% 1-hexanol in n-dodecane after contact with 1 M HNO<sub>3</sub>.

## Peak Analysis

Data Set:[hexanol30carb]Sheet1!D"La"

Date:10/4/2022

BaseLine:Line

Chi<sup>2</sup>=5.65969E-04

Adj. R-Square=9.99222E-01

# of Data Points=105

SS=5.60310E-02

Degrees of Freedom=99

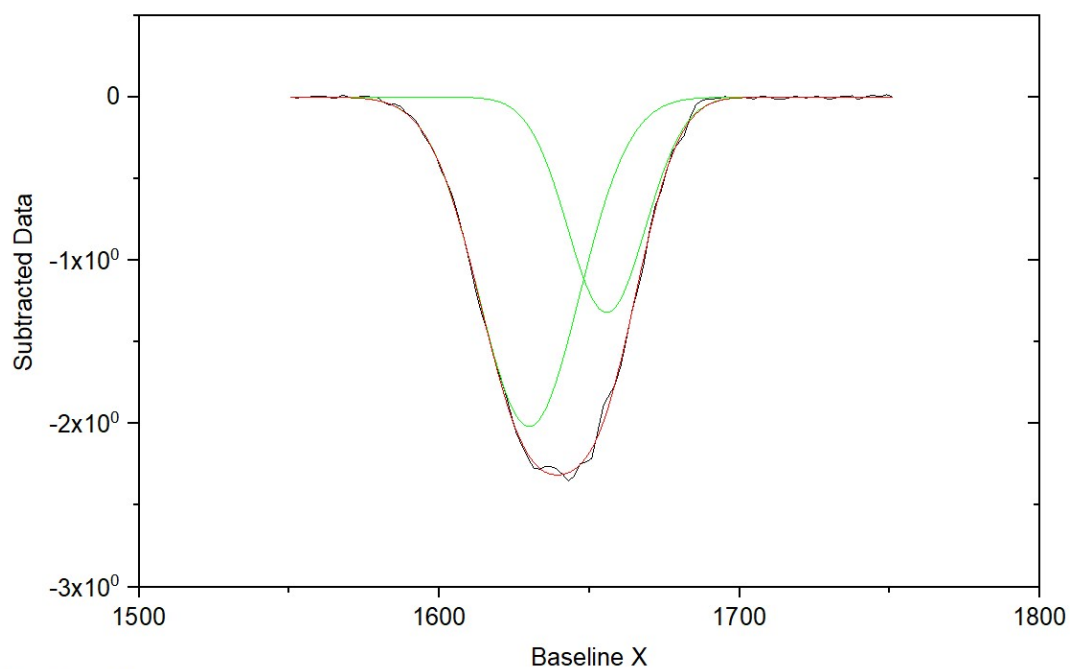

Fitting Results

| Peak Index | Peak Type | Area Intg | FWHM     | Max Height | Center Grvty | Area IntgP |
|------------|-----------|-----------|----------|------------|--------------|------------|
| 1          | Gaussian  | -84.44898 | 39.34672 | -2.01629   | 1629.92836   | -66.30571  |
| 2          | Gaussian  | -42.91409 | 30.5518  | -1.31957   | 1655.73469   | -33.69429  |

Figure S54. Peak analysis via OriginLab for 0.04 M TODGA with 30 vol% 1-hexanol in n-dodecane after contact with 3 mM La(NO<sub>3</sub>)<sub>3</sub> in 1 M HNO<sub>3</sub>.

## Peak Analysis

Data Set:[hexanol30carb]Sheet1!E"Ce"

Date:10/4/2022

BaseLine:Line

Chi<sup>2</sup>=8.41861E-04

Adj. R-Square=9.98897E-01

# of Data Points=105

SS=8.33443E-02

Degrees of Freedom=99

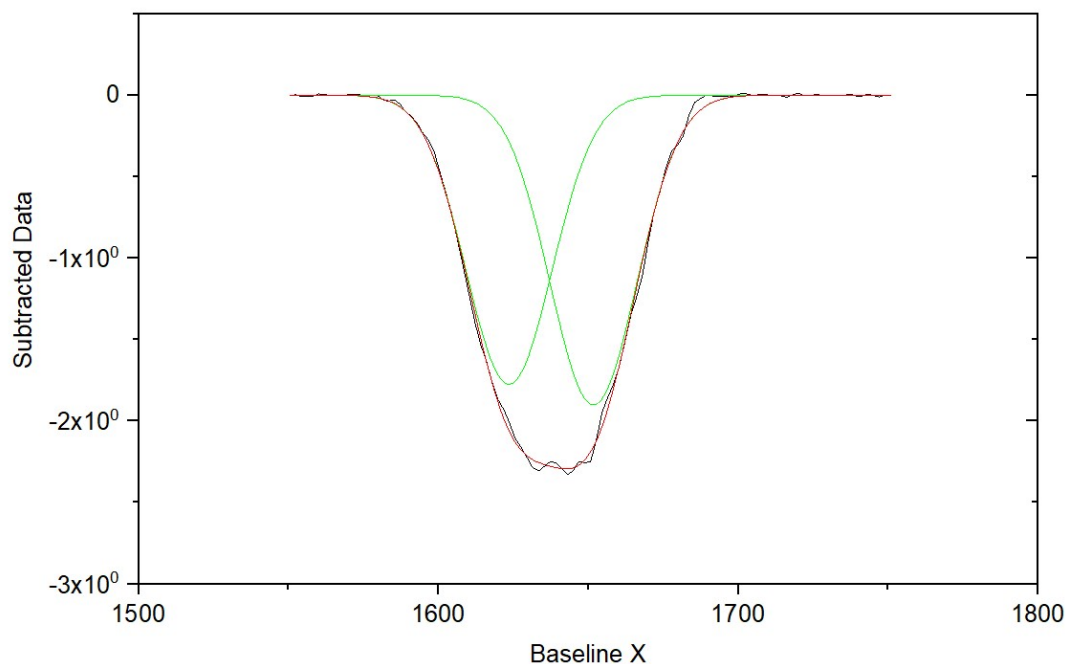

Fitting Results

| Peak Index | Peak Type | Area Intg | FWHM     | Max Height | Center Grvty | Area IntgP |
|------------|-----------|-----------|----------|------------|--------------|------------|
| 1          | Gaussian  | -63.74594 | 33.76411 | -1.77364   | 1623.57402   | -48.05829  |
| 2          | Gaussian  | -68.89703 | 34.05848 | -1.90039   | 1651.72089   | -51.94171  |

Figure S55. Peak analysis via OriginLab for 0.04 M TODGA with 30 vol% 1-hexanol in n-dodecane after contact with 3 mM Ce(NO<sub>3</sub>)<sub>3</sub> in 1 M HNO<sub>3</sub>.

## Peak Analysis

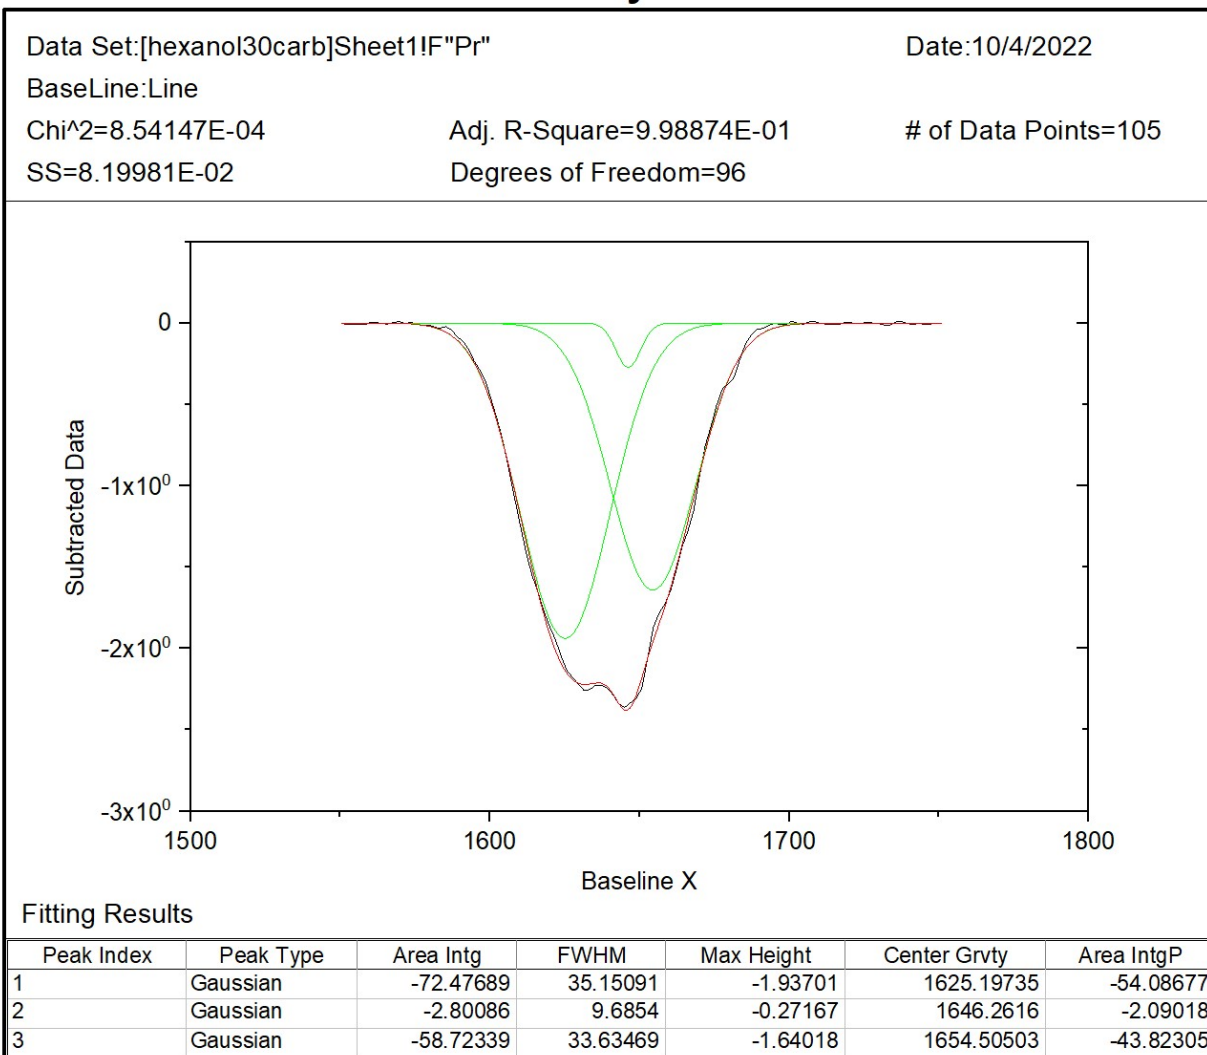

Figure S56. Peak analysis via OriginLab for 0.04 M TODGA with 30 vol% 1-hexanol in n-dodecane after contact with 3 mM Pr(NO<sub>3</sub>)<sub>3</sub> in 1 M HNO<sub>3</sub>.

## Peak Analysis

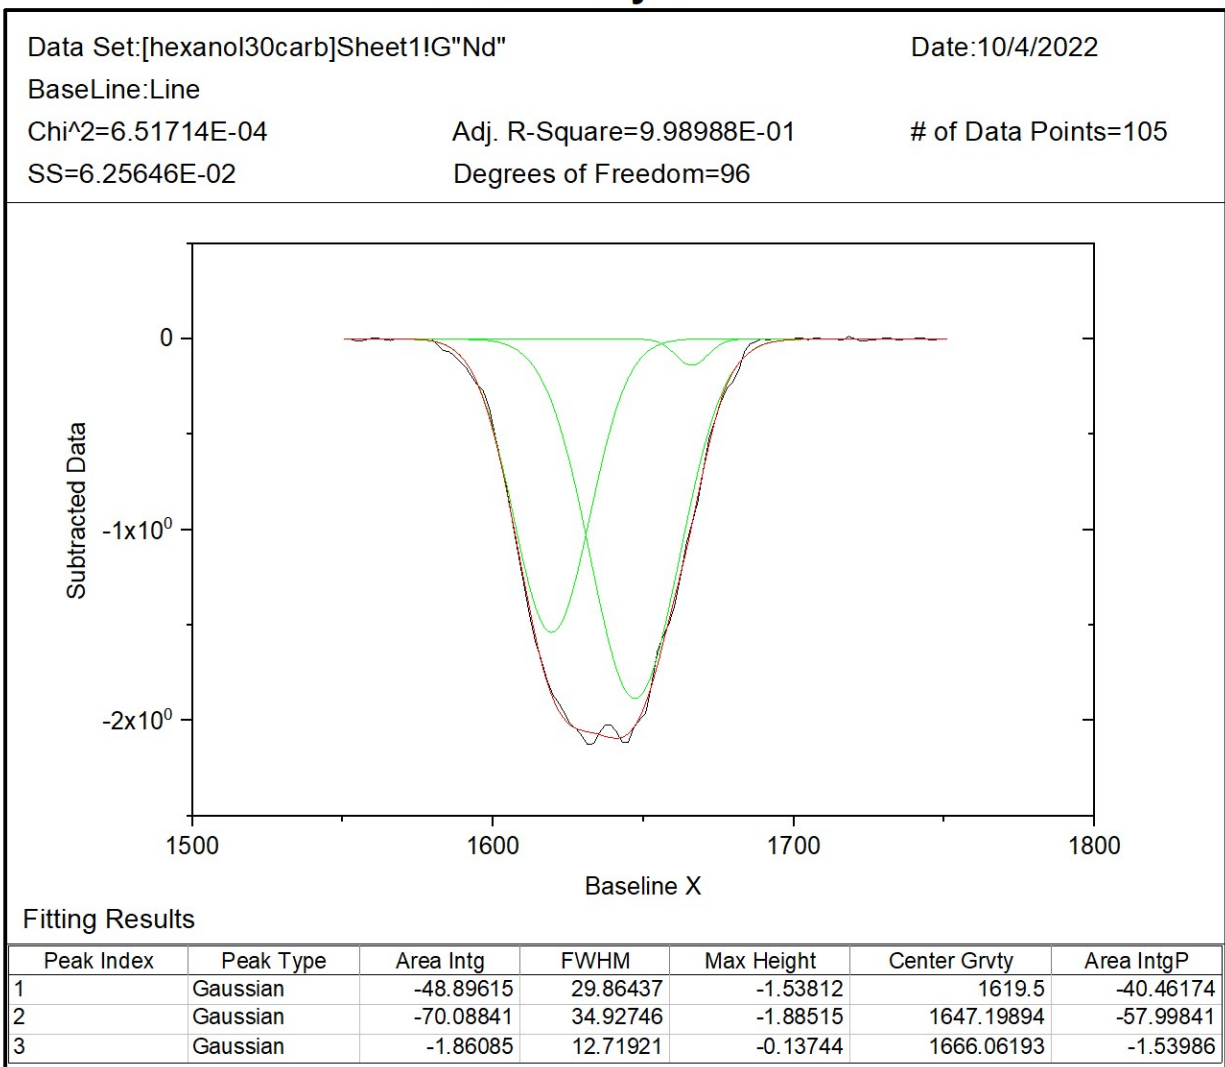

Figure S57. Peak analysis via OriginLab for 0.04 M TODGA with 30 vol% 1-hexanol in n-dodecane after contact with 3 mM Nd(NO<sub>3</sub>)<sub>3</sub> in 1 M HNO<sub>3</sub>.



## Peak Analysis

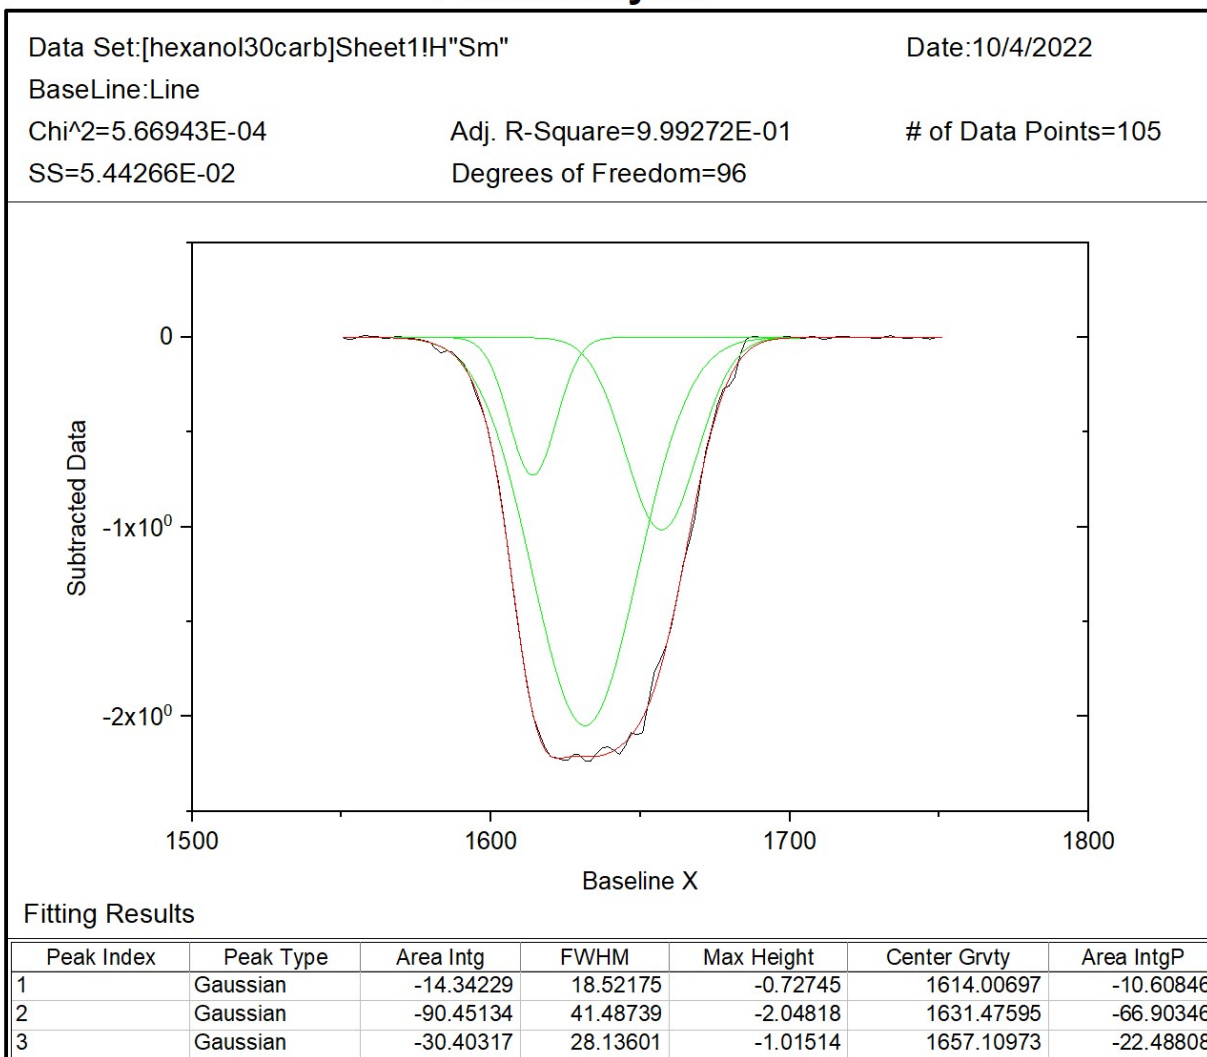

Figure S58. Peak analysis via OriginLab for 0.04 M TODGA with 30 vol% 1-hexanol in n-dodecane after contact with 3 mM  $\text{Sm}(\text{NO}_3)_3$  in 1 M  $\text{HNO}_3$ .

## Peak Analysis

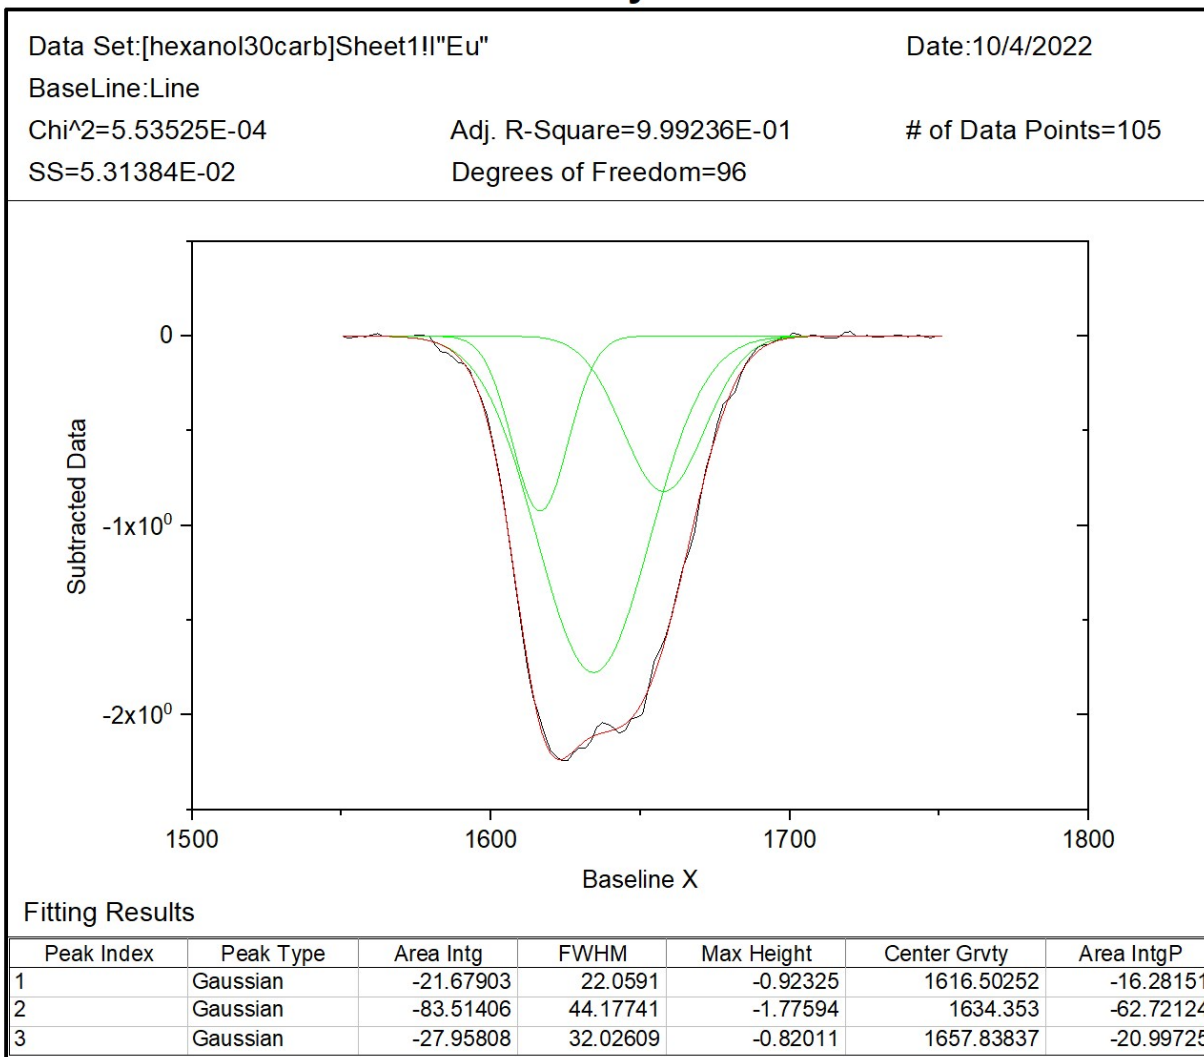

Figure S59. Peak analysis via OriginLab for 0.04 M TODGA with 30 vol% 1-hexanol in n-dodecane after contact with 3 mM Eu(NO<sub>3</sub>)<sub>3</sub> in 1 M HNO<sub>3</sub>.

## Peak Analysis

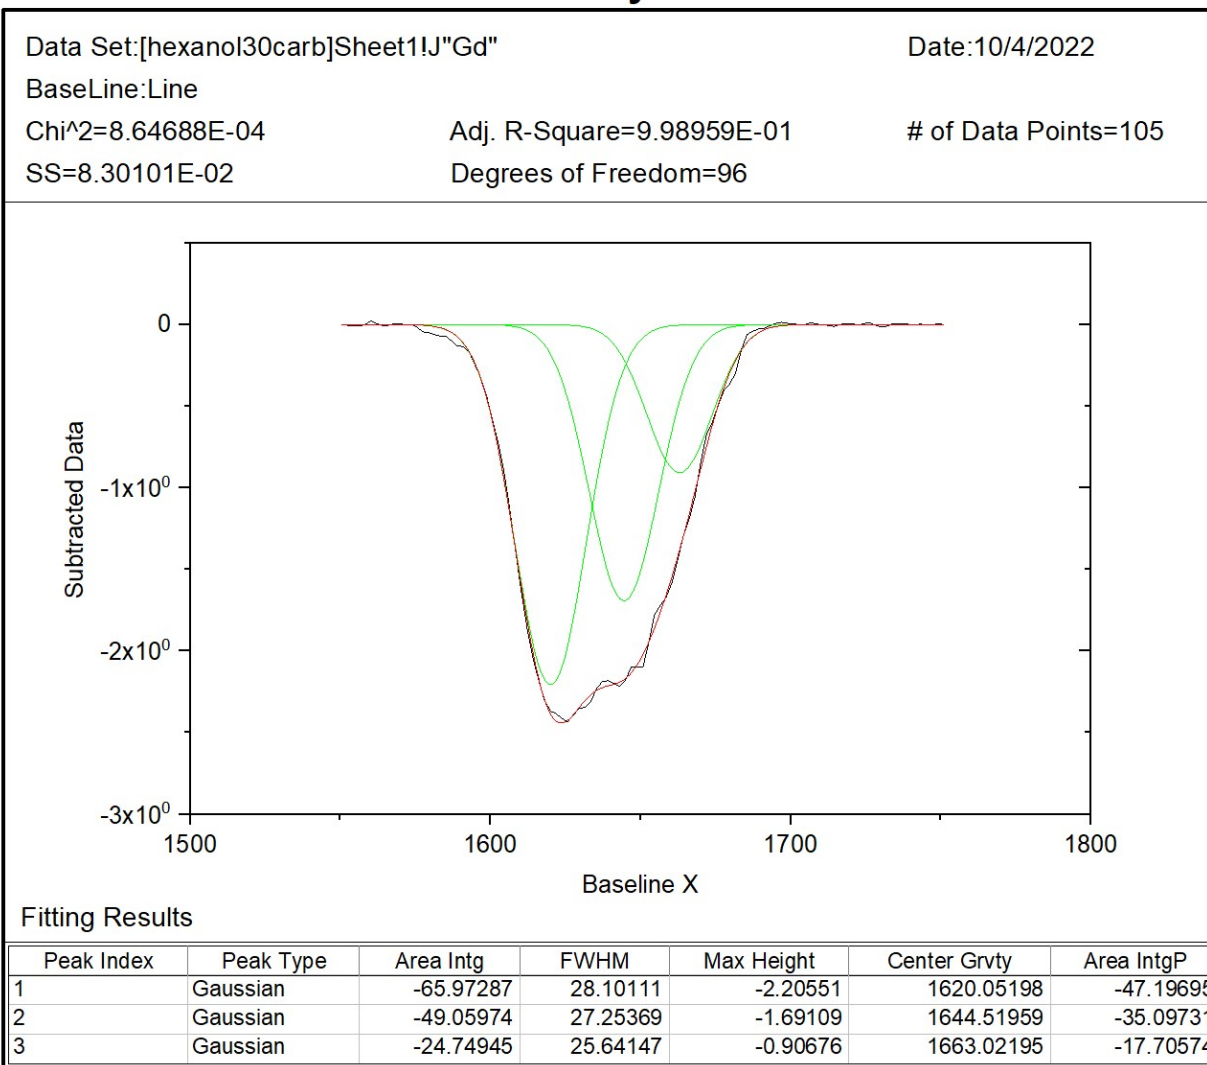

Figure S60. Peak analysis via OriginLab for 0.04 M TODGA with 30 vol% 1-hexanol in n-dodecane after contact with 3 mM Gd(NO<sub>3</sub>)<sub>3</sub> in 1 M HNO<sub>3</sub>.

## Peak Analysis

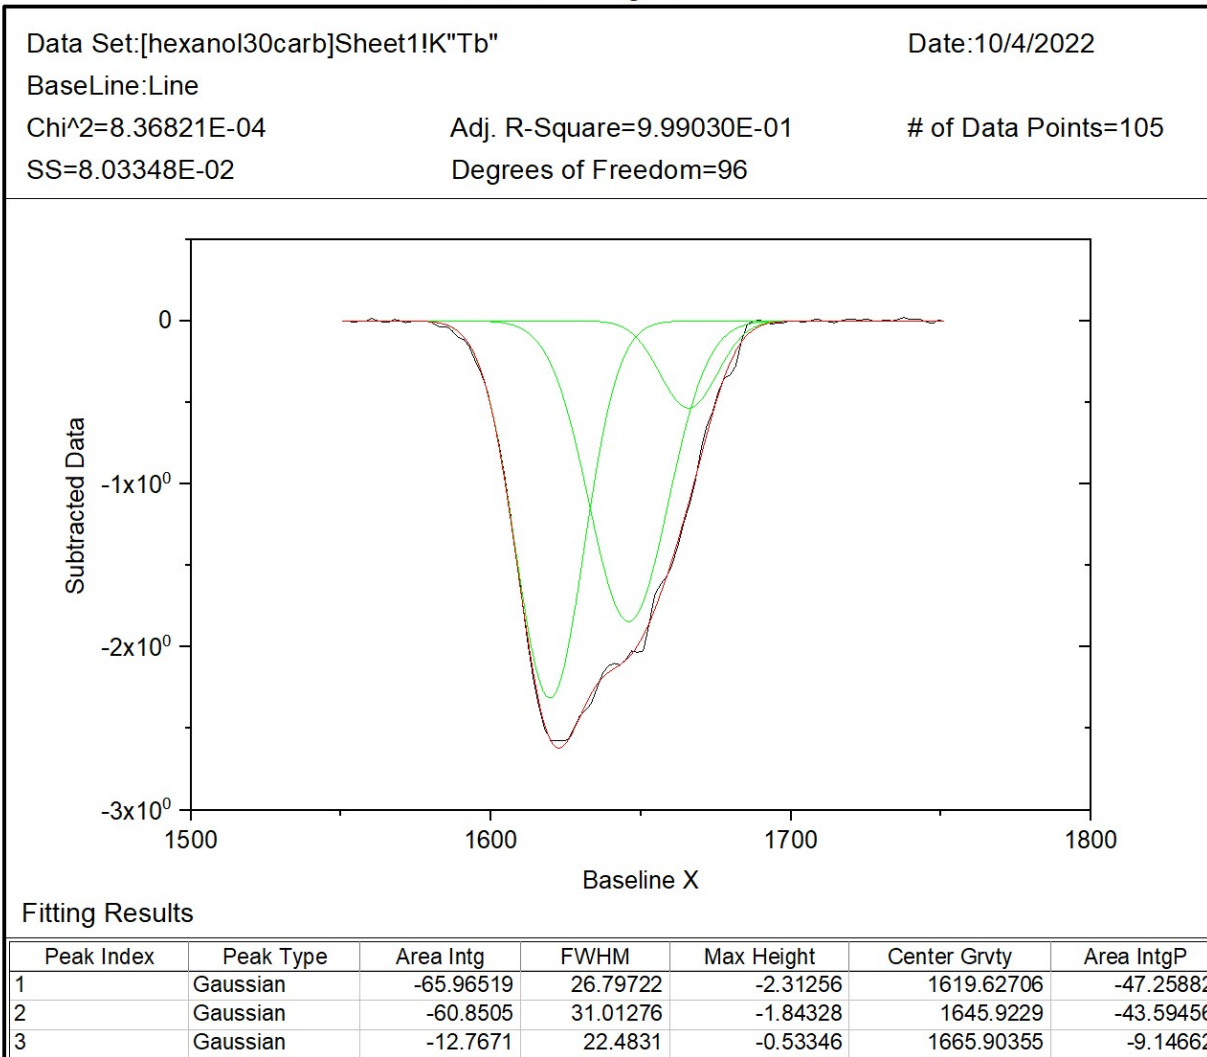

Figure S61. Peak analysis via OriginLab for 0.04 M TODGA with 30 vol% 1-hexanol in n-dodecane after contact with 3 mM Tb(NO<sub>3</sub>)<sub>3</sub> in 1 M HNO<sub>3</sub>.

## Peak Analysis

Data Set:[hexanol30carb]Sheet1!L"Dy"

Date:10/4/2022

BaseLine:Line

Chi^2=9.32042E-04

Adj. R-Square=9.98925E-01

# of Data Points=105

SS=9.22722E-02

Degrees of Freedom=99

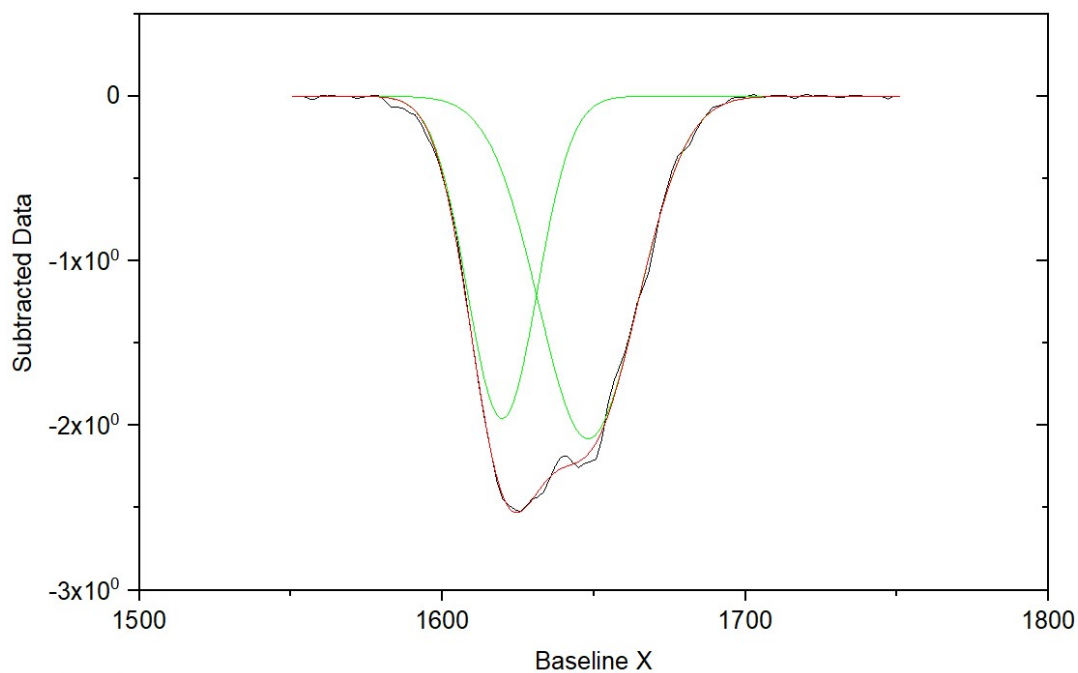

### Fitting Results

| Peak Index | Peak Type | Area Intg | FWHM     | Max Height | Center Grvty | Area IntgP |
|------------|-----------|-----------|----------|------------|--------------|------------|
| 1          | Gaussian  | -56.36908 | 27.06144 | -1.95685   | 1619.75749   | -39.84396  |
| 2          | Gaussian  | -85.10551 | 38.43698 | -2.08006   | 1648.07982   | -60.15604  |

Figure S62. Peak analysis via OriginLab for 0.04 M TODGA with 30 vol% 1-hexanol in n-dodecane after contact with 3 mM Dy(NO<sub>3</sub>)<sub>3</sub> in 1 M HNO<sub>3</sub>.

## Peak Analysis

Data Set:[hexanol30carb]Sheet1!M"Ho"

Date:10/4/2022

BaseLine:Line

Chi<sup>2</sup>=1.22307E-03

Adj. R-Square=9.98675E-01

# of Data Points=105

SS=1.21084E-01

Degrees of Freedom=99

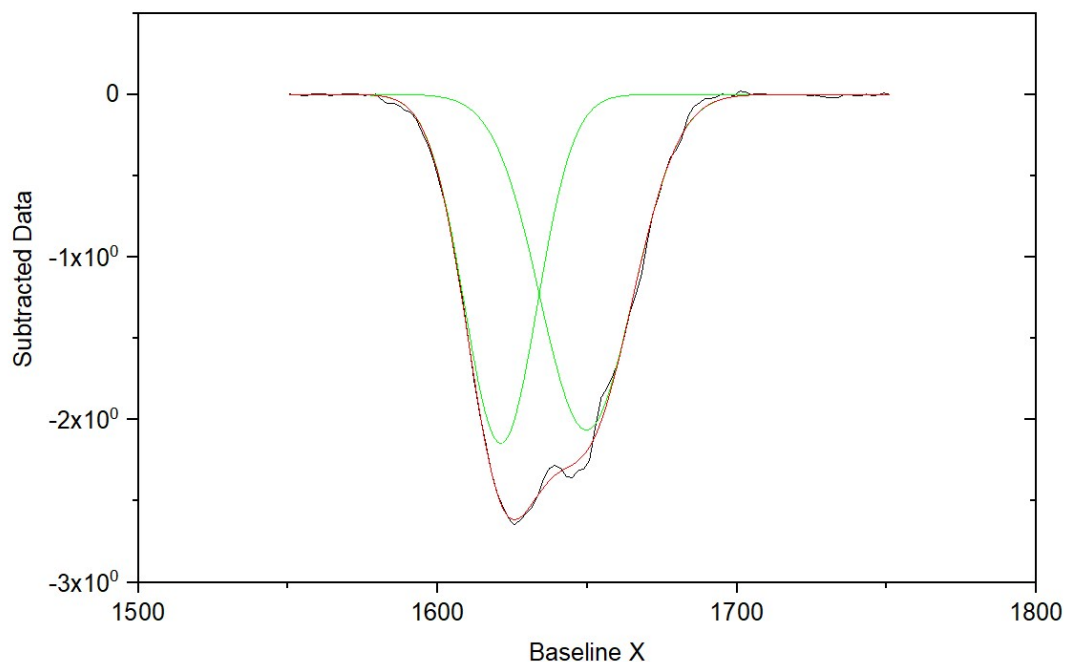

### Fitting Results

| Peak Index | Peak Type | Area Intg | FWHM     | Max Height | Center Grvty | Area IntgP |
|------------|-----------|-----------|----------|------------|--------------|------------|
| 1          | Gaussian  | -65.14495 | 28.54157 | -2.14423   | 1621.15225   | -44.9079   |
| 2          | Gaussian  | -79.91851 | 36.3979  | -2.06271   | 1649.73885   | -55.0921   |

Figure S63. Peak analysis via OriginLab for 0.04 M TODGA with 30 vol% 1-hexanol in n-dodecane after contact with 3 mM Ho(NO<sub>3</sub>)<sub>3</sub> in 1 M HNO<sub>3</sub>.

## Peak Analysis

Data Set:[hexanol30carb]Sheet1!N"Er"

Date:10/4/2022

BaseLine:Line

Chi<sup>2</sup>=8.69203E-04

Adj. R-Square=9.98929E-01

# of Data Points=105

SS=8.60511E-02

Degrees of Freedom=99

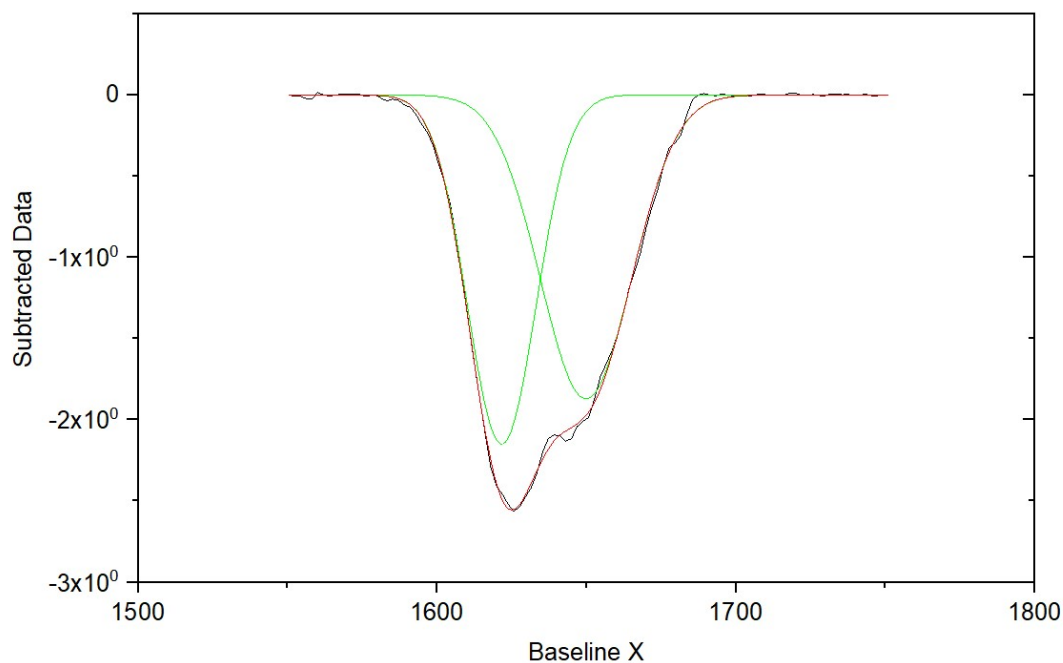

### Fitting Results

| Peak Index | Peak Type | Area Intg | FWHM     | Max Height | Center Grvty | Area IntgP |
|------------|-----------|-----------|----------|------------|--------------|------------|
| 1          | Gaussian  | -61.61407 | 26.94036 | -2.14854   | 1621.68929   | -46.31311  |
| 2          | Gaussian  | -71.42401 | 35.87526 | -1.87032   | 1649.85982   | -53.68689  |

Figure S64. Peak analysis via OriginLab for 0.04 M TODGA with 30 vol% 1-hexanol in n-dodecane after contact with 3 mM Er(NO<sub>3</sub>)<sub>3</sub> in 1 M HNO<sub>3</sub>.

## Peak Analysis

Data Set:[hexanol30carb]Sheet1!O" Tm"

Date:11/2/2022

BaseLine:Line

Chi^2=9.24131E-04

Adj. R-Square=9.98899E-01

# of Data Points=105

SS=9.14890E-02

Degrees of Freedom=99

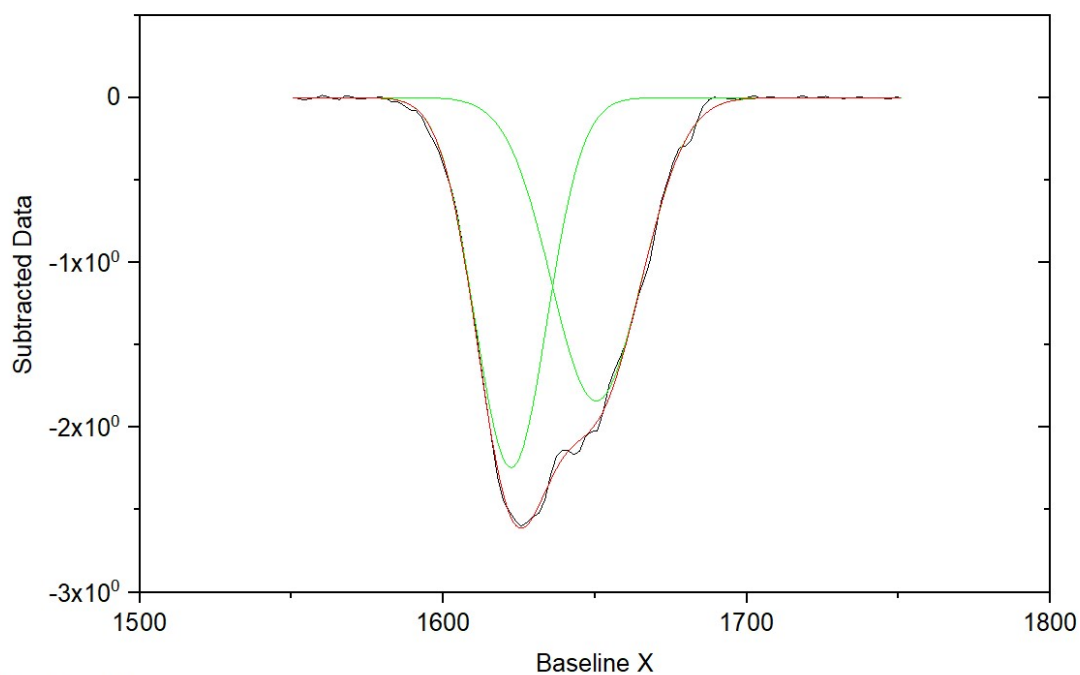

Fitting Results

| Peak Index | Peak Type | Area Intg | FWHM     | Max Height | Center Grvty | Area IntgP |
|------------|-----------|-----------|----------|------------|--------------|------------|
| 1          | Gaussian  | -66.40863 | 27.8193  | -2.24257   | 1622.37499   | -49.31736  |
| 2          | Gaussian  | -68.24706 | 34.85965 | -1.8392    | 1650.44443   | -50.68264  |

Figure S65. Peak analysis via OriginLab for 0.04 M TODGA with 30 vol% 1-hexanol in n-dodecane after contact with 3 mM Tm(NO<sub>3</sub>)<sub>3</sub> in 1 M HNO<sub>3</sub>.



## Peak Analysis

Data Set:[hexanol30carb]Sheet1!P"Yb"

Date:10/4/2022

BaseLine:Line

Chi^2=1.41915E-03

Adj. R-Square=9.98524E-01

# of Data Points=105

SS=1.40496E-01

Degrees of Freedom=99

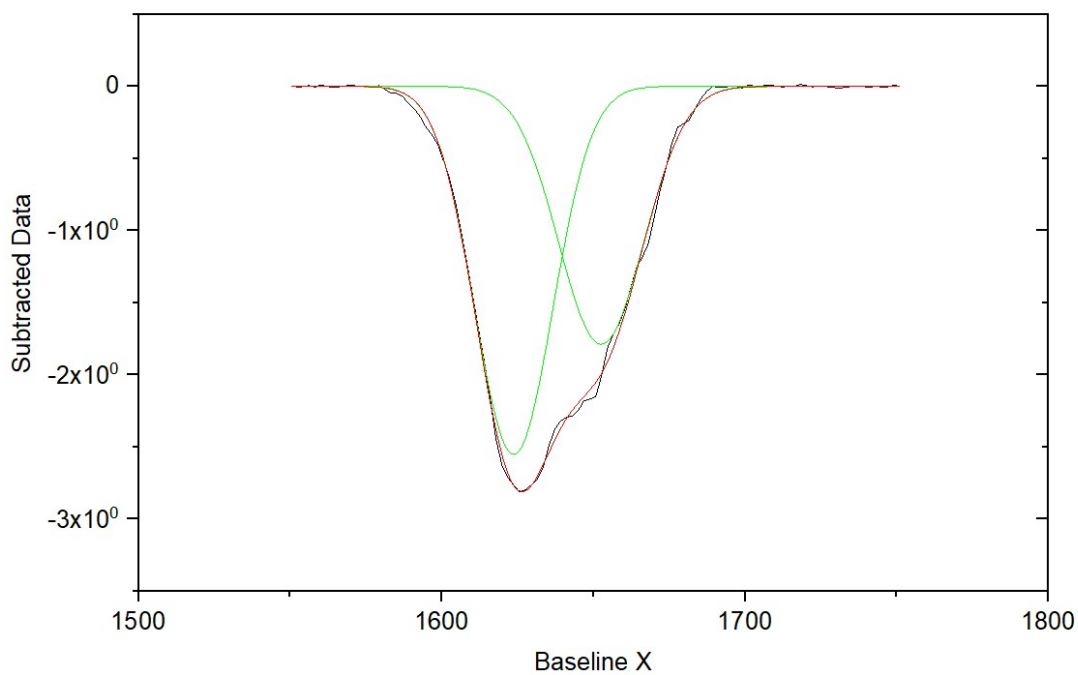

Fitting Results

| Peak Index | Peak Type | Area Intg | FWHM     | Max Height | Center Grvty | Area IntgP |
|------------|-----------|-----------|----------|------------|--------------|------------|
| 1          | Gaussian  | -82.28609 | 30.27876 | -2.55303   | 1623.75448   | -56.71404  |
| 2          | Gaussian  | -62.80336 | 32.98865 | -1.78849   | 1652.58194   | -43.28596  |

Figure S66. Peak analysis via OriginLab for 0.04 M TODGA with 30 vol% 1-hexanol in n-dodecane after contact with 3 mM  $\text{Yb}(\text{NO}_3)_3$  in 1 M  $\text{HNO}_3$ .

## Peak Analysis

Data Set:[hexanol30carb]Sheet1!Q"Lu"

Date:10/4/2022

BaseLine:Line

Chi<sup>2</sup>=1.58619E-03

Adj. R-Square=9.98377E-01

# of Data Points=105

SS=1.57032E-01

Degrees of Freedom=99

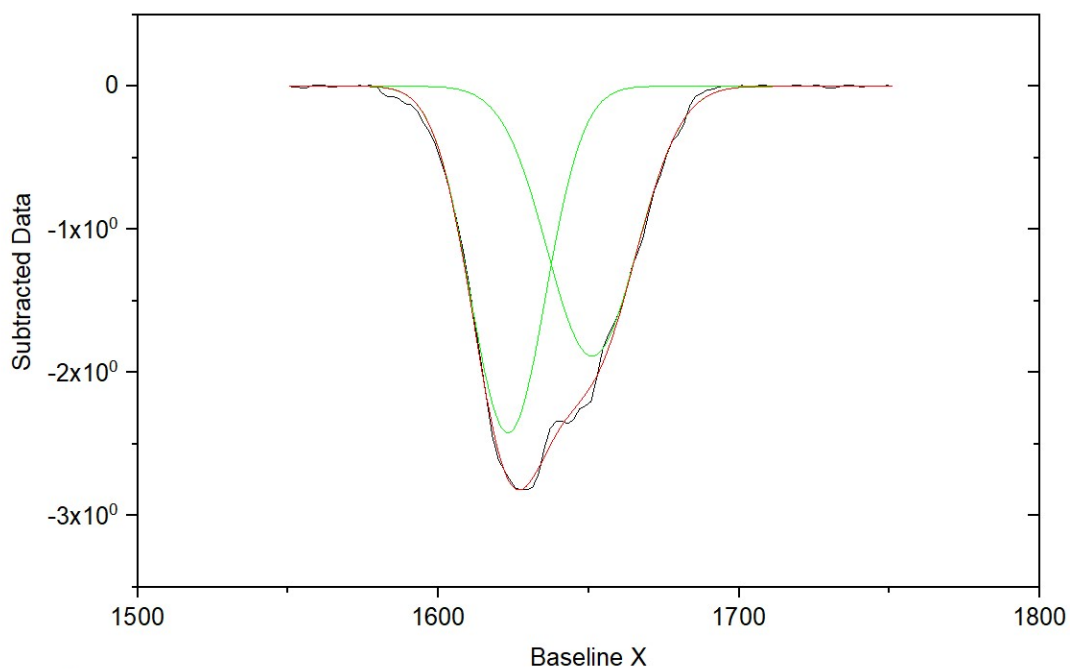

Fitting Results

| Peak Index | Peak Type | Area Intg | FWHM     | Max Height | Center Grvty | Area IntgP |
|------------|-----------|-----------|----------|------------|--------------|------------|
| 1          | Gaussian  | -75.73984 | 29.37383 | -2.42232   | 1623.20952   | -51.79272  |
| 2          | Gaussian  | -70.49661 | 35.10758 | -1.88641   | 1651.13793   | -48.20728  |

Figure S67. Peak analysis via OriginLab for 0.04 M TODGA with 30 vol% 1-hexanol in n-dodecane after contact with 3 mM Lu(NO<sub>3</sub>)<sub>3</sub> in 1 M HNO<sub>3</sub>.

5 vol% 1-octanol

## Peak Analysis

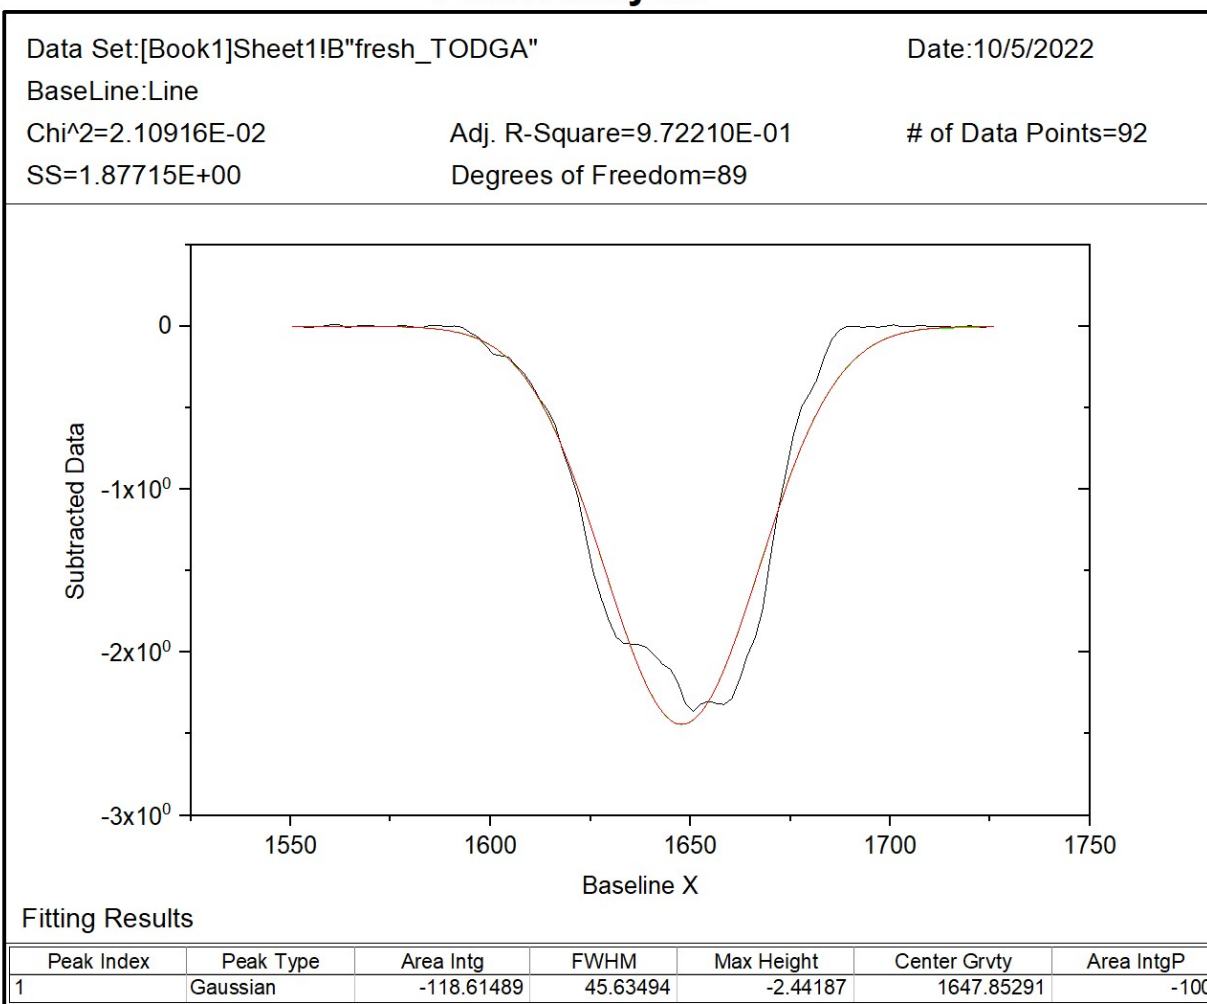

Figure S68. Peak analysis via OriginLab for 0.04 M of fresh TODGA with 5 vol% 1-octanol in n-dodecane.

## Peak Analysis

Data Set:[Book1]Sheet1!C"preeqm\_TODGA"

Date:10/5/2022

BaseLine:Line

Chi<sup>2</sup>=2.40035E-03

Adj. R-Square=9.96875E-01

# of Data Points=92

SS=2.06430E-01

Degrees of Freedom=86

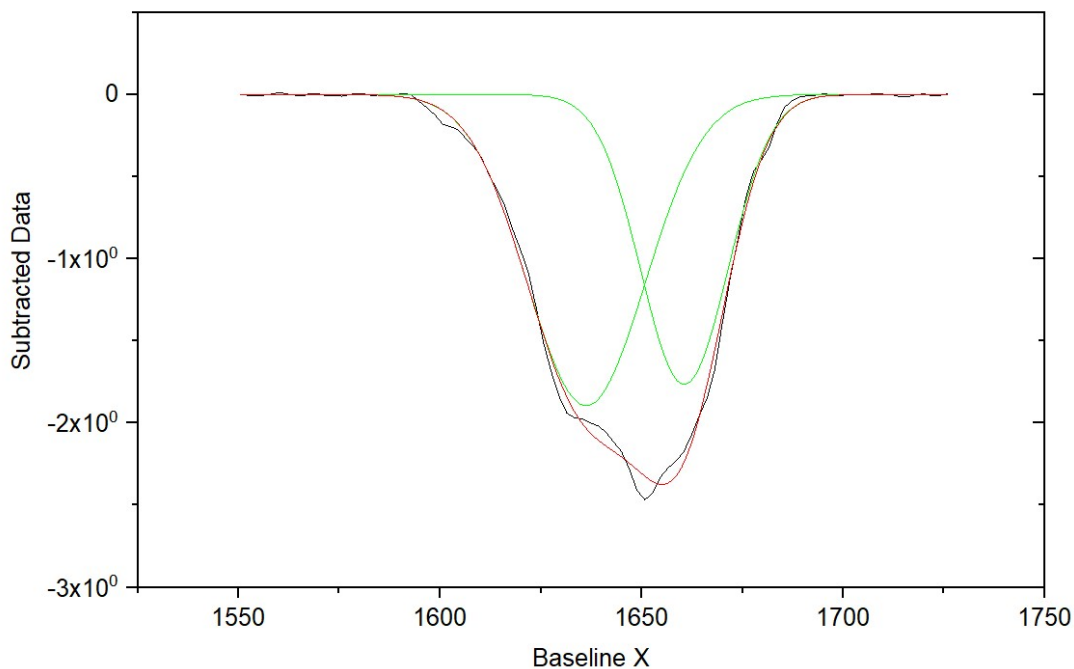

### Fitting Results

| Peak Index | Peak Type | Area Intg | FWHM     | Max Height | Center Grvty | Area IntgP |
|------------|-----------|-----------|----------|------------|--------------|------------|
| 1          | Gaussian  | -47.74273 | 25.43437 | -1.76341   | 1660.57506   | -40.78421  |
| 2          | Gaussian  | -69.31906 | 34.38393 | -1.89393   | 1636.24621   | -59.21579  |

Figure S69. Peak analysis via OriginLab for 0.04 M TODGA with 5 vol% 1-octanol in n-dodecane after contact with 1 M HNO<sub>3</sub>.

## Peak Analysis

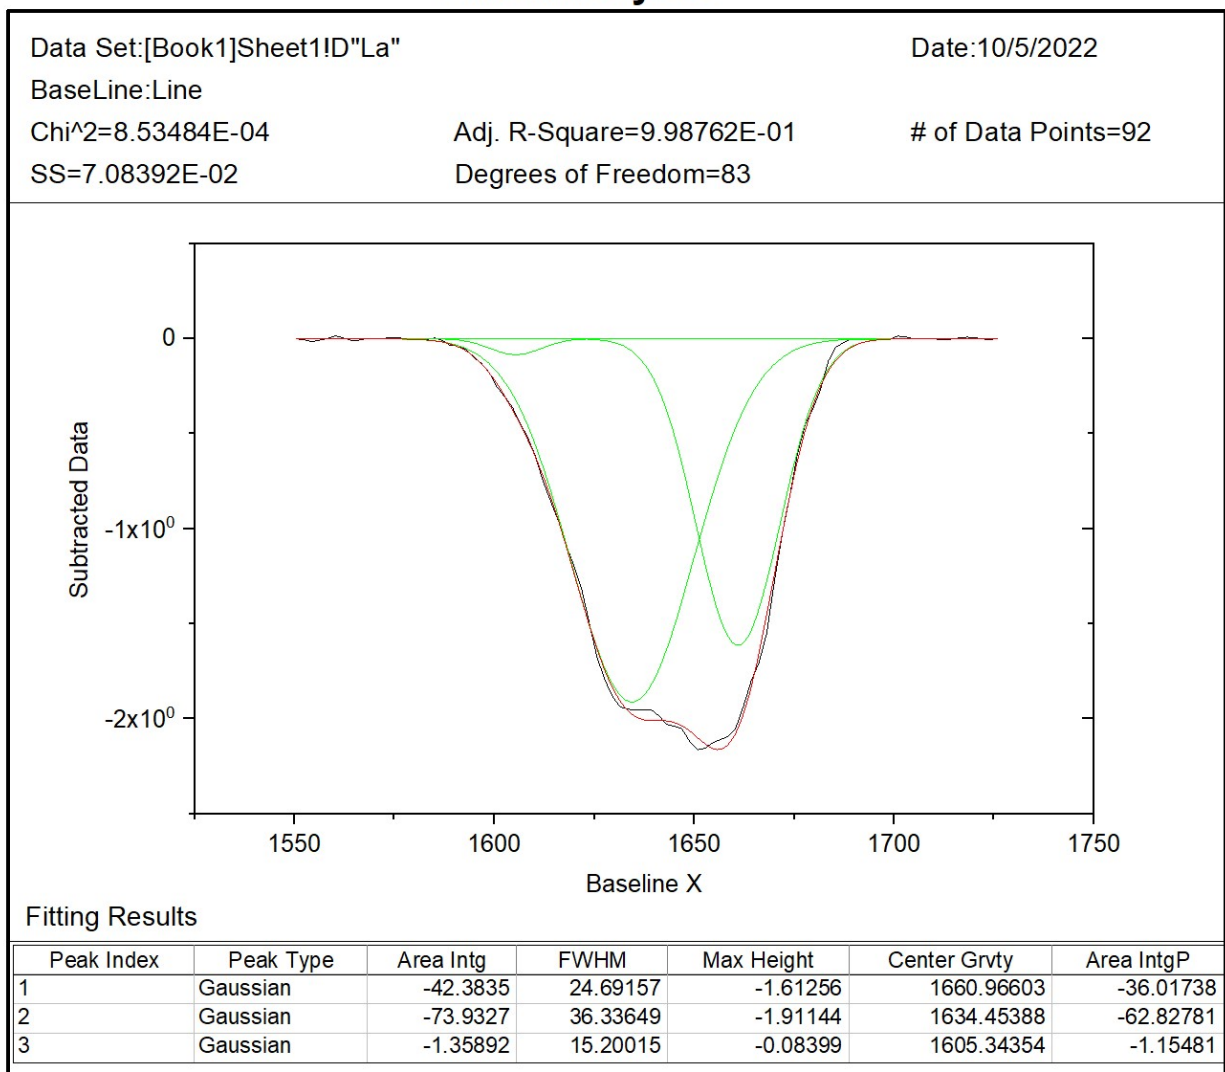

Figure S70. Peak analysis via OriginLab for 0.04 M TODGA with 5 vol% 1-octanol in n-dodecane after contact with 3 mM La(NO<sub>3</sub>)<sub>3</sub> in 1 M HNO<sub>3</sub>.

## Peak Analysis

Data Set:[Book1]Sheet1!E"Ce"

Date:10/5/2022

BaseLine:Line

Chi^2=8.99563E-04

Adj. R-Square=9.98674E-01

# of Data Points=92

SS=7.46637E-02

Degrees of Freedom=83

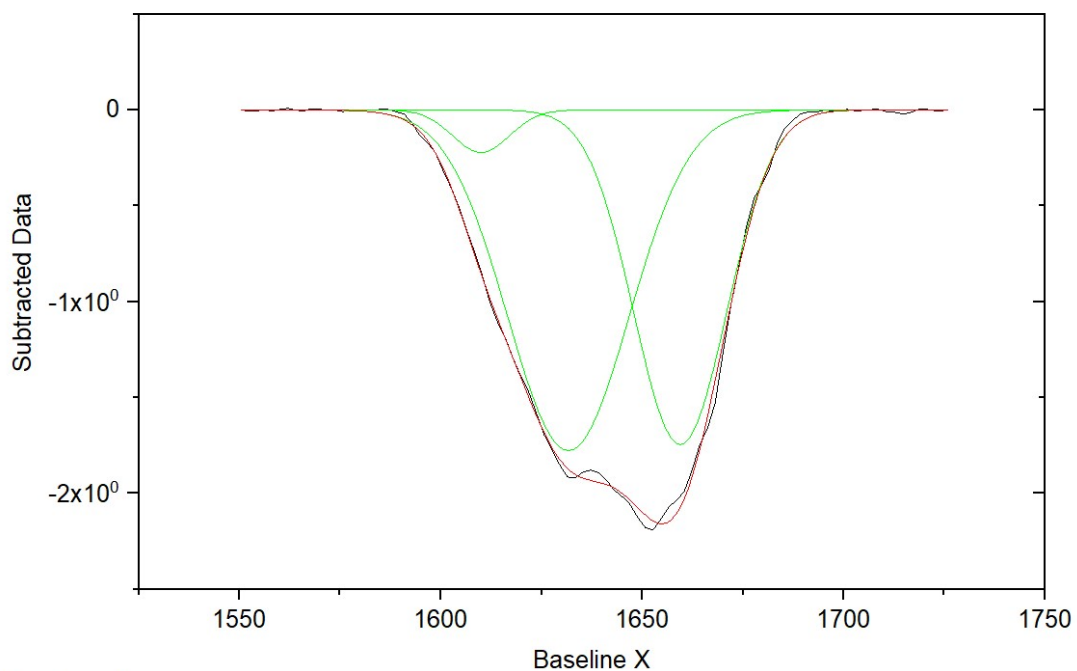

### Fitting Results

| Peak Index | Peak Type | Area Intg | FWHM     | Max Height | Center Grvty | Area IntgP |
|------------|-----------|-----------|----------|------------|--------------|------------|
| 1          | Gaussian  | -67.2453  | 35.56285 | -1.77637   | 1631.68963   | -55.3187   |
| 2          | Gaussian  | -50.39115 | 27.14002 | -1.74426   | 1659.45002   | -41.45379  |
| 3          | Gaussian  | -3.92335  | 16.68236 | -0.22094   | 1609.99412   | -3.2275    |

Figure S71. Peak analysis via OriginLab for 0.04 M TODGA with 5 vol% 1-octanol in n-dodecane after contact with 3 mM Ce(NO<sub>3</sub>)<sub>3</sub> in 1 M HNO<sub>3</sub>.

## Peak Analysis

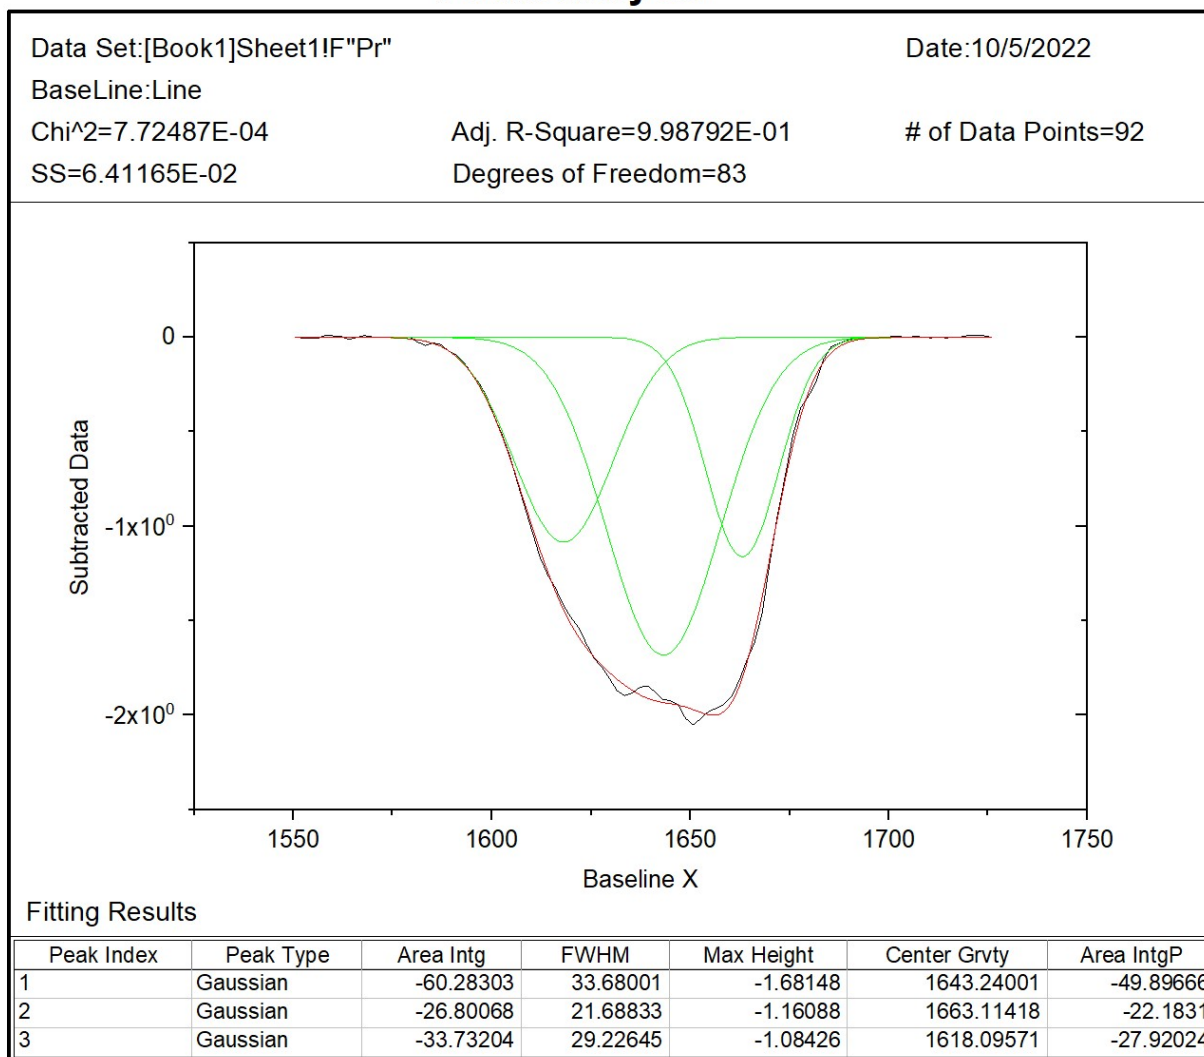

Figure S72. Peak analysis via OriginLab for 0.04 M TODGA with 5 vol% 1-octanol in n-dodecane after contact with 3 mM  $\text{Pr}(\text{NO}_3)_3$  in 1 M  $\text{HNO}_3$ .

## Peak Analysis

Data Set:[Book1]Sheet1!G"Nd"

Date:10/5/2022

BaseLine:Line

Chi<sup>2</sup>=7.35106E-04

Adj. R-Square=9.98462E-01

# of Data Points=92

SS=6.10138E-02

Degrees of Freedom=83

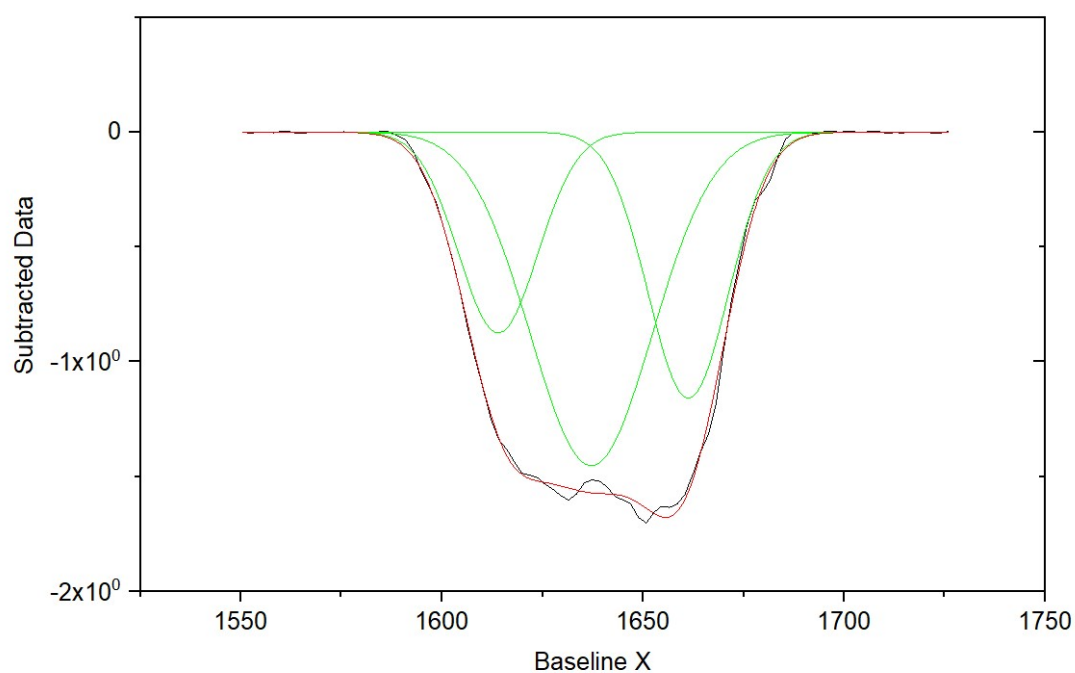

### Fitting Results

| Peak Index | Peak Type | Area Intg | FWHM     | Max Height | Center Grvty | Area IntgP |
|------------|-----------|-----------|----------|------------|--------------|------------|
| 1          | Gaussian  | -55.20371 | 35.68429 | -1.45331   | 1637.14009   | -52.14071  |
| 2          | Gaussian  | -29.06261 | 23.56414 | -1.15865   | 1661.27655   | -27.45006  |
| 3          | Gaussian  | -21.60817 | 23.2096  | -0.87462   | 1613.99471   | -20.40923  |

Figure S73. Peak analysis via OriginLab for 0.04 M TODGA with 5 vol% 1-octanol in n-dodecane after contact with 3 mM Nd(NO<sub>3</sub>)<sub>3</sub> in 1 M HNO<sub>3</sub>.



## Peak Analysis

Data Set:[Book1]Sheet1!H"Sm"

Date:10/5/2022

BaseLine:Line

Chi^2=1.49620E-03

Adj. R-Square=9.96836E-01

# of Data Points=92

SS=1.28673E-01

Degrees of Freedom=86

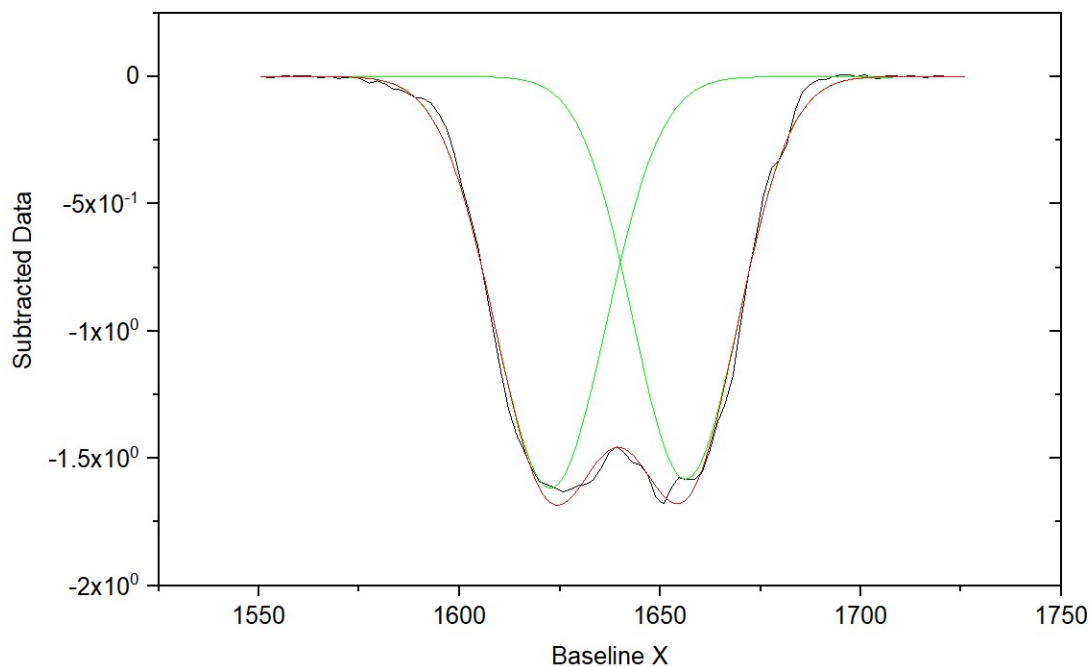

Fitting Results

| Peak Index | Peak Type | Area Intg | FWHM     | Max Height | Center Grvty | Area IntgP |
|------------|-----------|-----------|----------|------------|--------------|------------|
| 1          | Gaussian  | -55.91383 | 32.50617 | -1.61593   | 1622.64555   | -51.85909  |
| 2          | Gaussian  | -51.90493 | 30.83854 | -1.58118   | 1656.36128   | -48.14091  |

Figure S74. Peak analysis via OriginLab for 0.04 M TODGA with 5 vol% 1-octanol in n-dodecane after contact with 3 mM Sm(NO<sub>3</sub>)<sub>3</sub> in 1 M HNO<sub>3</sub>.

## Peak Analysis

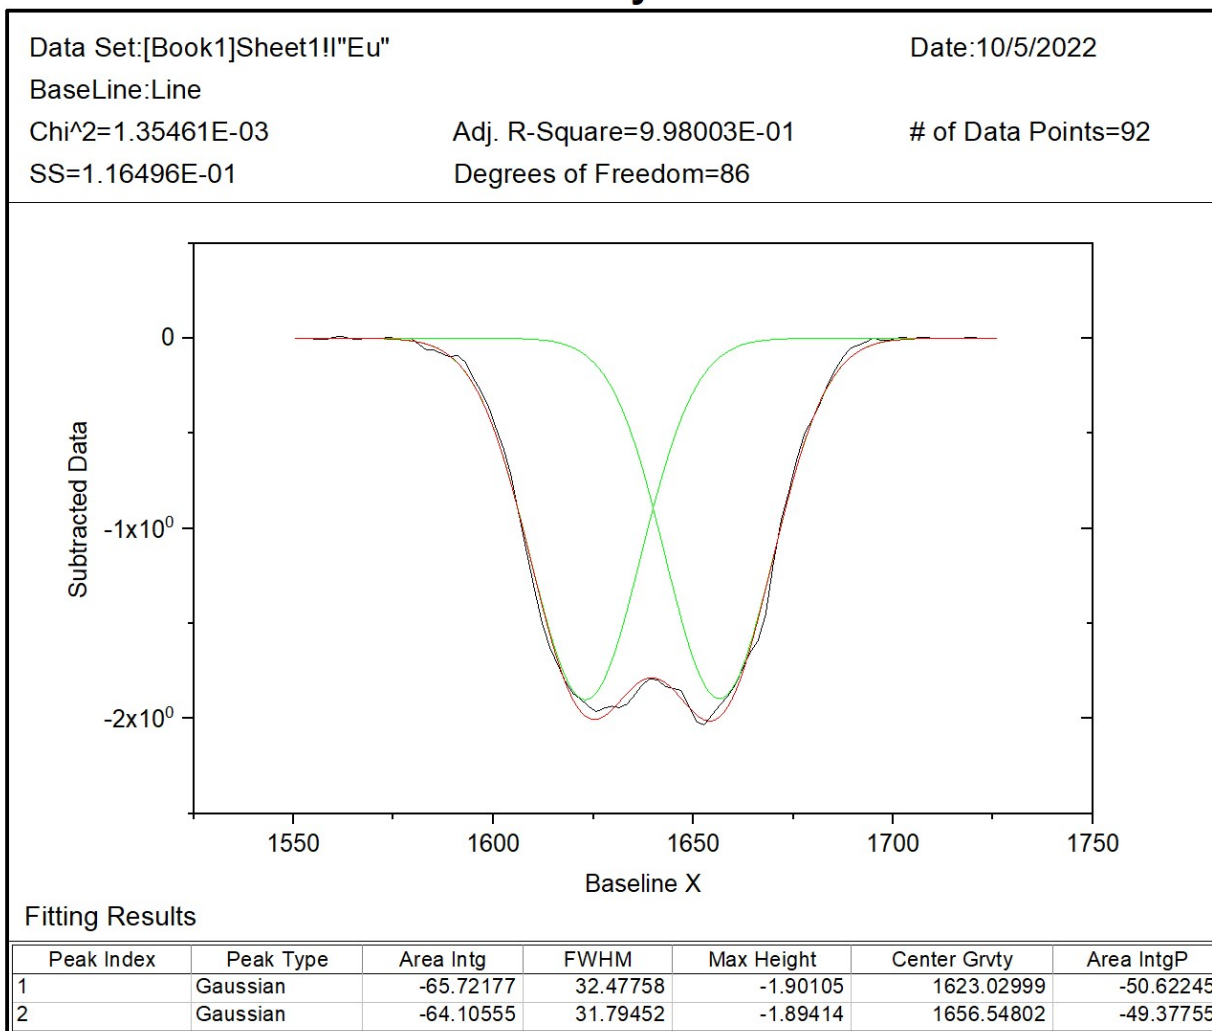

Figure S75. Peak analysis via OriginLab for 0.04 M TODGA with 5 vol% 1-octanol in n-dodecane after contact with 3 mM  $\text{Eu}(\text{NO}_3)_3$  in 1 M  $\text{HNO}_3$ .

## Peak Analysis

Data Set:[Book1]Sheet1!J"Gd"

Date:10/5/2022

BaseLine:Line

Chi^2=1.98636E-03

Adj. R-Square=9.97331E-01

# of Data Points=92

SS=1.70827E-01

Degrees of Freedom=86

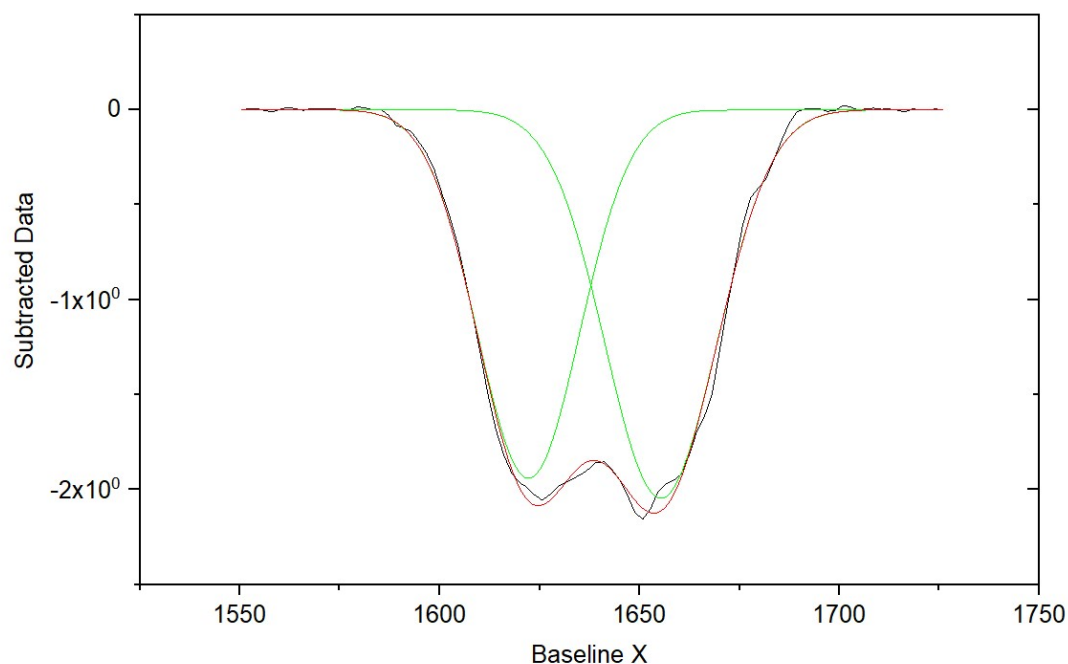

### Fitting Results

| Peak Index | Peak Type | Area Intg | FWHM     | Max Height | Center Grvty | Area IntgP |
|------------|-----------|-----------|----------|------------|--------------|------------|
| 1          | Gaussian  | -62.21422 | 30.11714 | -1.94063   | 1622.23655   | -46.59122  |
| 2          | Gaussian  | -71.31785 | 32.75475 | -2.04546   | 1655.35687   | -53.40878  |

Figure S76. Peak analysis via OriginLab for 0.04 M TODGA with 5 vol% 1-octanol in n-dodecane after contact with 3 mM Gd(NO<sub>3</sub>)<sub>3</sub> in 1 M HNO<sub>3</sub>.

## Peak Analysis

Data Set:[Book1]Sheet1!K"Tb"

Date:10/5/2022

BaseLine:Line

Chi^2=1.06639E-03

Adj. R-Square=9.98511E-01

# of Data Points=92

SS=9.17097E-02

Degrees of Freedom=86

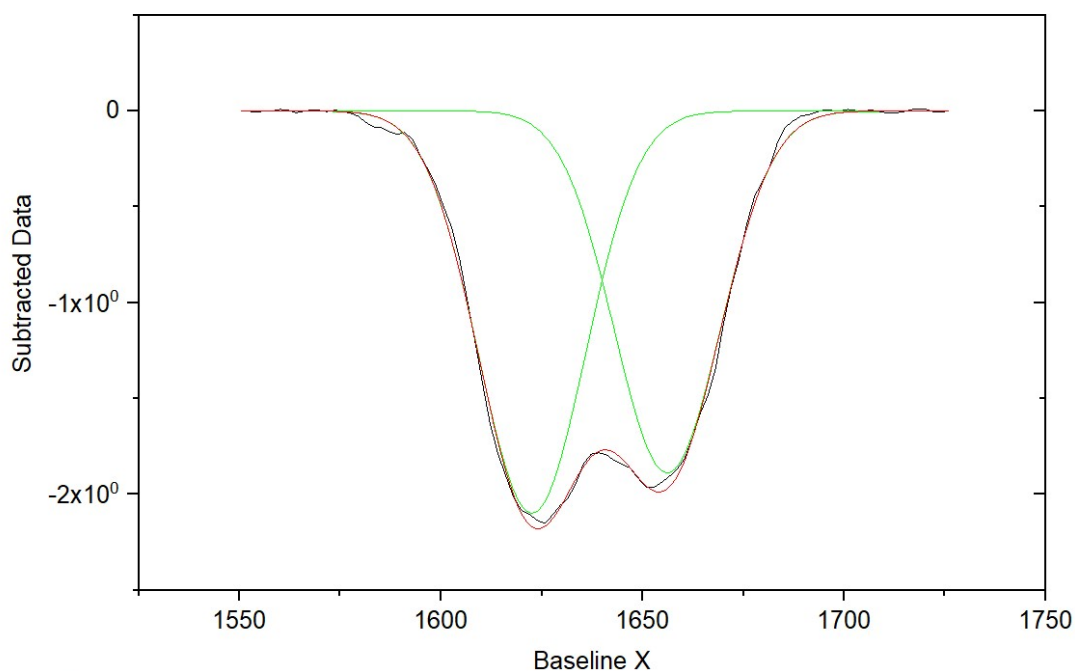

Fitting Results

| Peak Index | Peak Type | Area Intg | FWHM     | Max Height | Center Grvty | Area IntgP |
|------------|-----------|-----------|----------|------------|--------------|------------|
| 1          | Gaussian  | -69.66085 | 31.19362 | -2.09793   | 1622.56405   | -52.85233  |
| 2          | Gaussian  | -62.14193 | 30.92907 | -1.88749   | 1656.14111   | -47.14767  |

Figure S77. Peak analysis via OriginLab for 0.04 M TODGA with 5 vol% 1-octanol in n-dodecane after contact with 3 mM Tb(NO<sub>3</sub>)<sub>3</sub> in 1 M HNO<sub>3</sub>.

## Peak Analysis

Data Set:[Book1]Sheet1!L"Dy"

Date:10/5/2022

BaseLine:Line

Chi<sup>2</sup>=1.15266E-03

Adj. R-Square=9.98166E-01

# of Data Points=92

SS=9.91284E-02

Degrees of Freedom=86

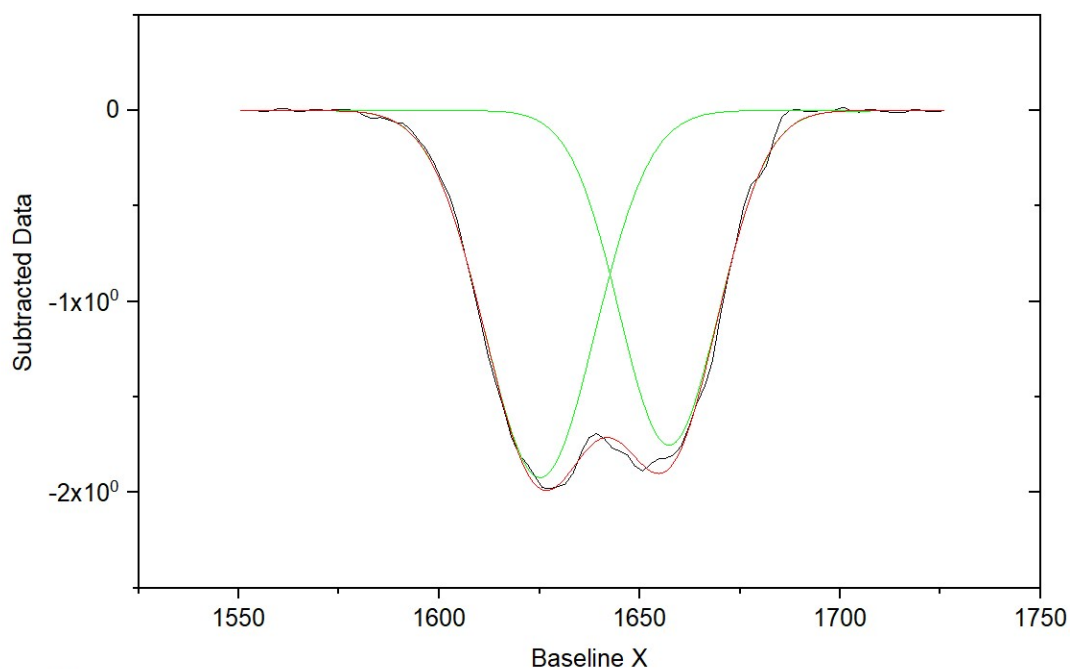

Fitting Results

| Peak Index | Peak Type | Area Intg | FWHM     | Max Height | Center Grvty | Area IntgP |
|------------|-----------|-----------|----------|------------|--------------|------------|
| 1          | Gaussian  | -65.99567 | 32.2502  | -1.92243   | 1625.14878   | -54.9501   |
| 2          | Gaussian  | -54.10541 | 29.00207 | -1.75259   | 1657.30665   | -45.0499   |

Figure S78. Peak analysis via OriginLab for 0.04 M TODGA with 5 vol% 1-octanol in n-dodecane after contact with 3 mM Dy(NO<sub>3</sub>)<sub>3</sub> in 1 M HNO<sub>3</sub>.

## Peak Analysis

Data Set:[Book1]Sheet1!M"Ho"

Date:10/5/2022

BaseLine:Line

Chi<sup>2</sup>=9.63036E-04

Adj. R-Square=9.98681E-01

# of Data Points=92

SS=8.28211E-02

Degrees of Freedom=86

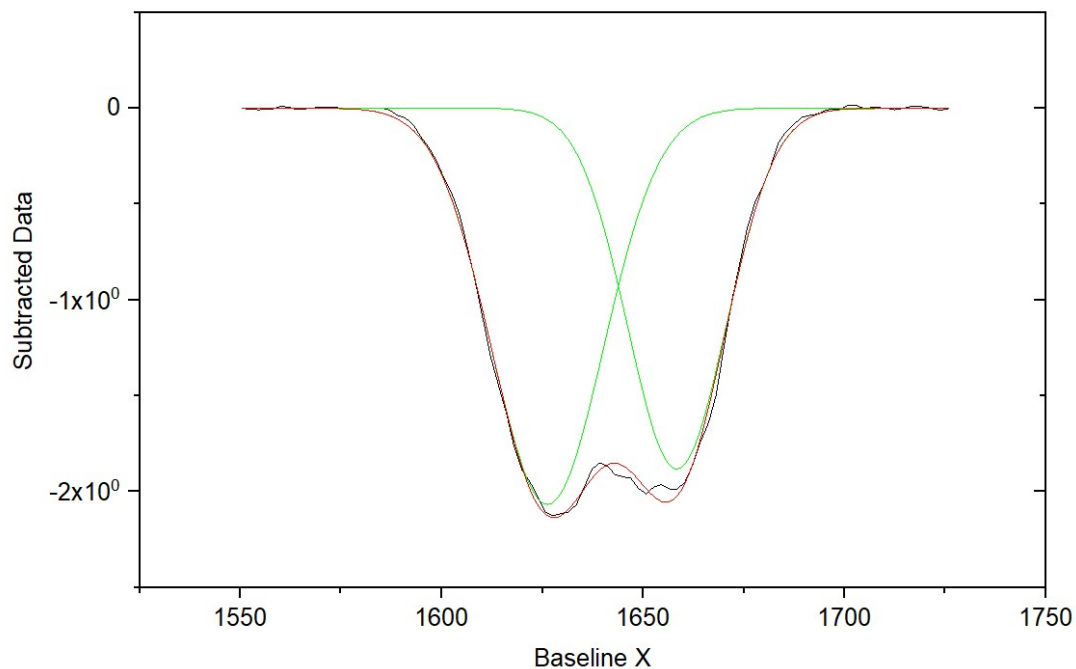

Fitting Results

| Peak Index | Peak Type | Area Intg | FWHM     | Max Height | Center Grvty | Area IntgP |
|------------|-----------|-----------|----------|------------|--------------|------------|
| 1          | Gaussian  | -71.99766 | 32.7169  | -2.06735   | 1626.2767    | -55.56964  |
| 2          | Gaussian  | -57.56528 | 28.74337 | -1.88144   | 1658.38637   | -44.43036  |

Figure S79. Peak analysis via OriginLab for 0.04 M TODGA with 5 vol% 1-octanol in n-dodecane after contact with 3 mM Ho(NO<sub>3</sub>)<sub>3</sub> in 1 M HNO<sub>3</sub>.

## Peak Analysis

Data Set:[Book1]Sheet1!N"Er"

Date:10/5/2022

BaseLine:Line

Chi^2=1.34783E-03

Adj. R-Square=9.97900E-01

# of Data Points=92

SS=1.15914E-01

Degrees of Freedom=86

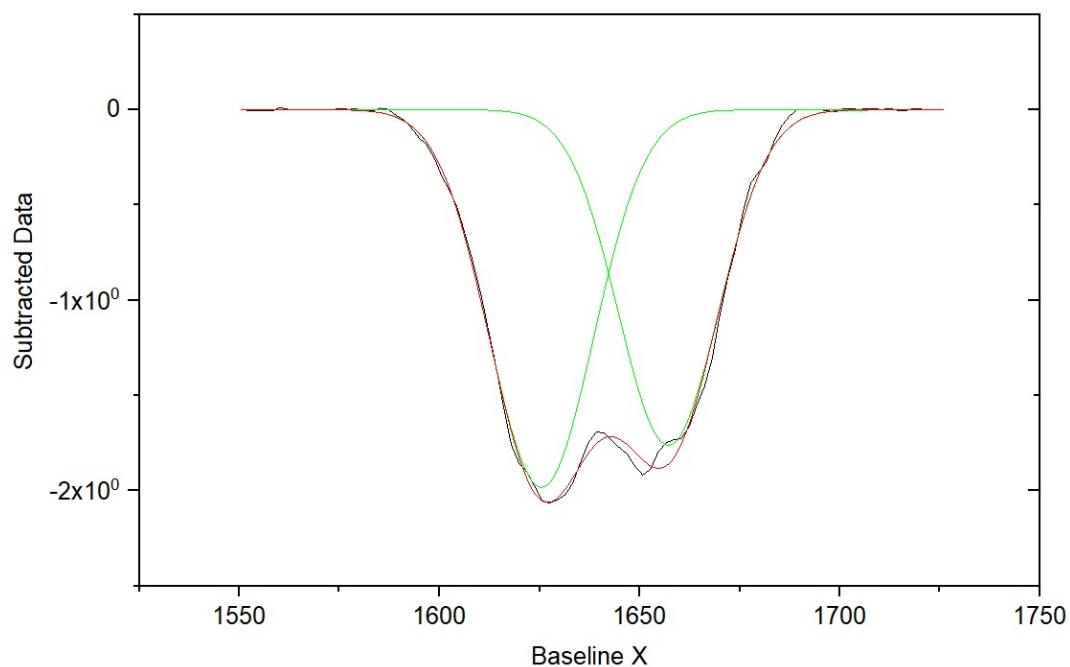

### Fitting Results

| Peak Index | Peak Type | Area Intg | FWHM     | Max Height | Center Grvty | Area IntgP |
|------------|-----------|-----------|----------|------------|--------------|------------|
| 1          | Gaussian  | -64.40884 | 30.5294  | -1.98196   | 1625.4711    | -53.91965  |
| 2          | Gaussian  | -55.04453 | 29.36407 | -1.76103   | 1657.18949   | -46.08035  |

Figure S80. Peak analysis via OriginLab for 0.04 M TODGA with 5 vol% 1-octanol in n-dodecane after contact with 3 mM ER(NO<sub>3</sub>)<sub>3</sub> in 1 M HNO<sub>3</sub>.

## Peak Analysis

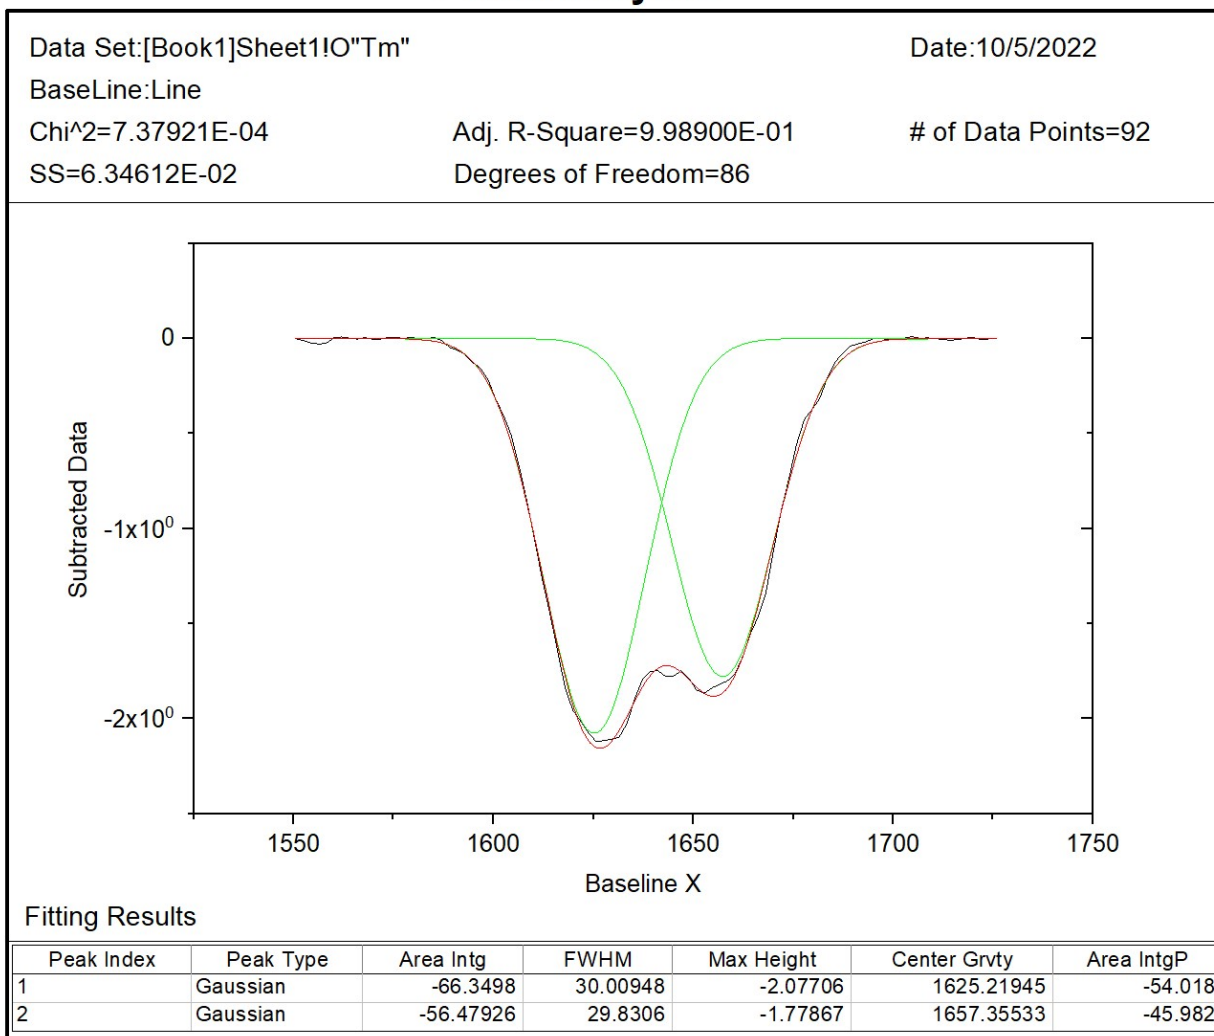

Figure S81. Peak analysis via OriginLab for 0.04 M TODGA with 5 vol% 1-octanol in n-dodecane after contact with 3 mM Tm(NO<sub>3</sub>)<sub>3</sub> in 1 M HNO<sub>3</sub>.



## Peak Analysis

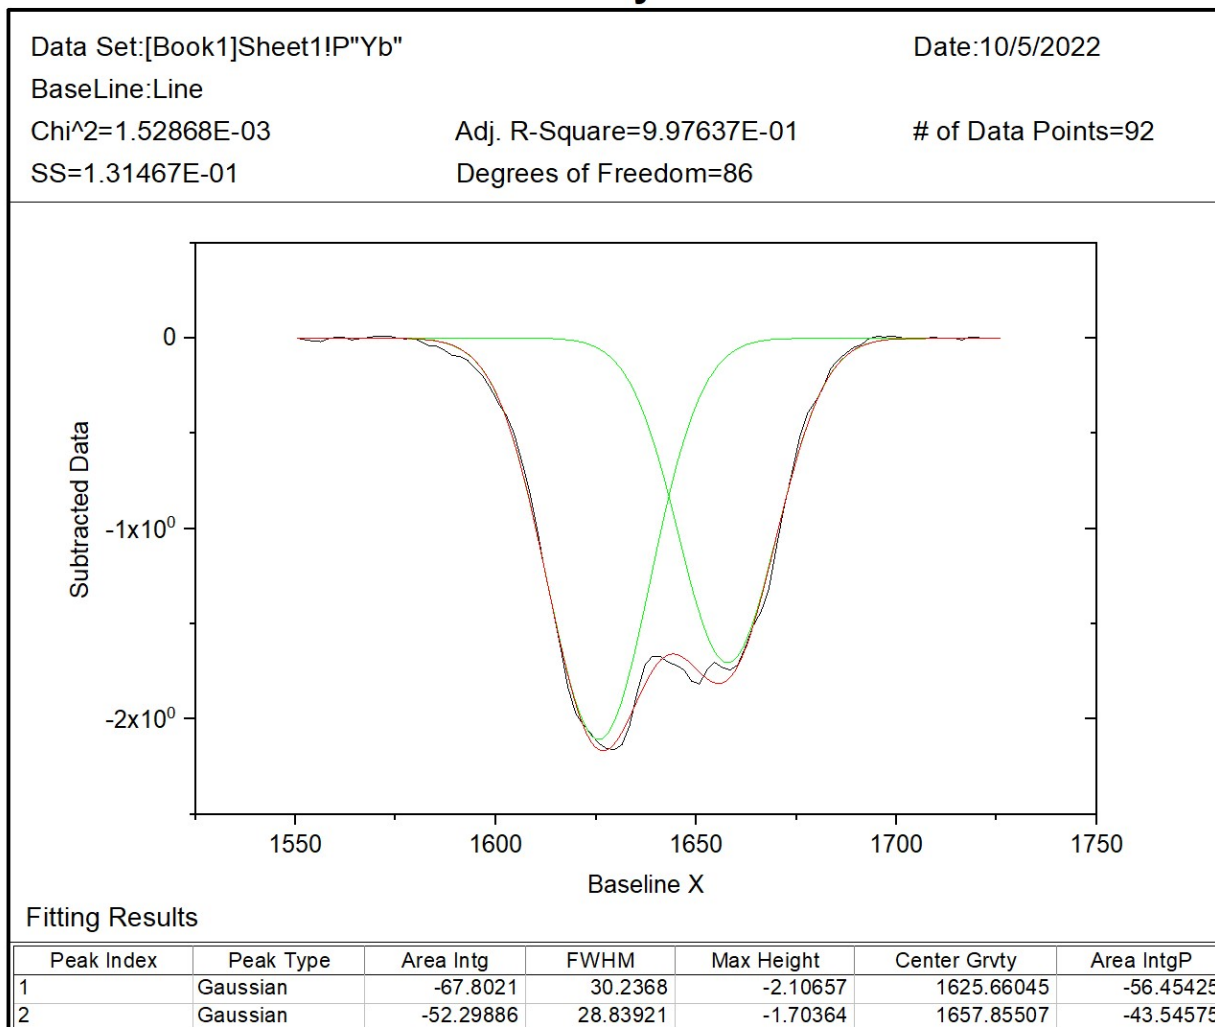

Figure S82. Peak analysis via OriginLab for 0.04 M TODGA with 5 vol% 1-octanol in n-dodecane after contact with 3 mM Yb(NO<sub>3</sub>)<sub>3</sub> in 1 M HNO<sub>3</sub>.

## Peak Analysis

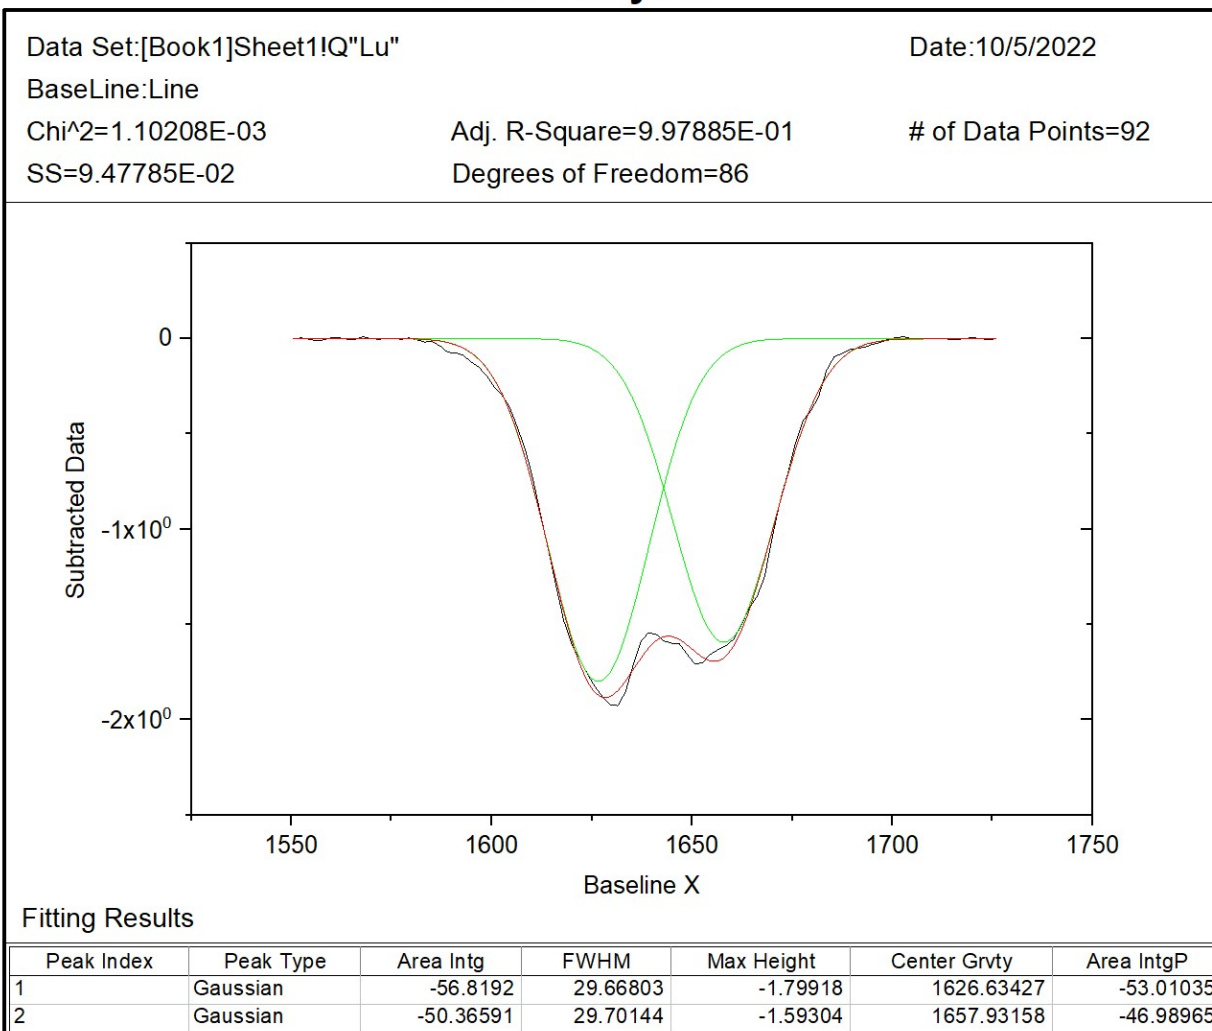

Figure S83. Peak analysis via OriginLab for 0.04 M TODGA with 5 vol% 1-octanol in n-dodecane after contact with 3 mM Lu(NO<sub>3</sub>)<sub>3</sub> in 1 M HNO<sub>3</sub>.

10 vol% 1-octanol

## Peak Analysis

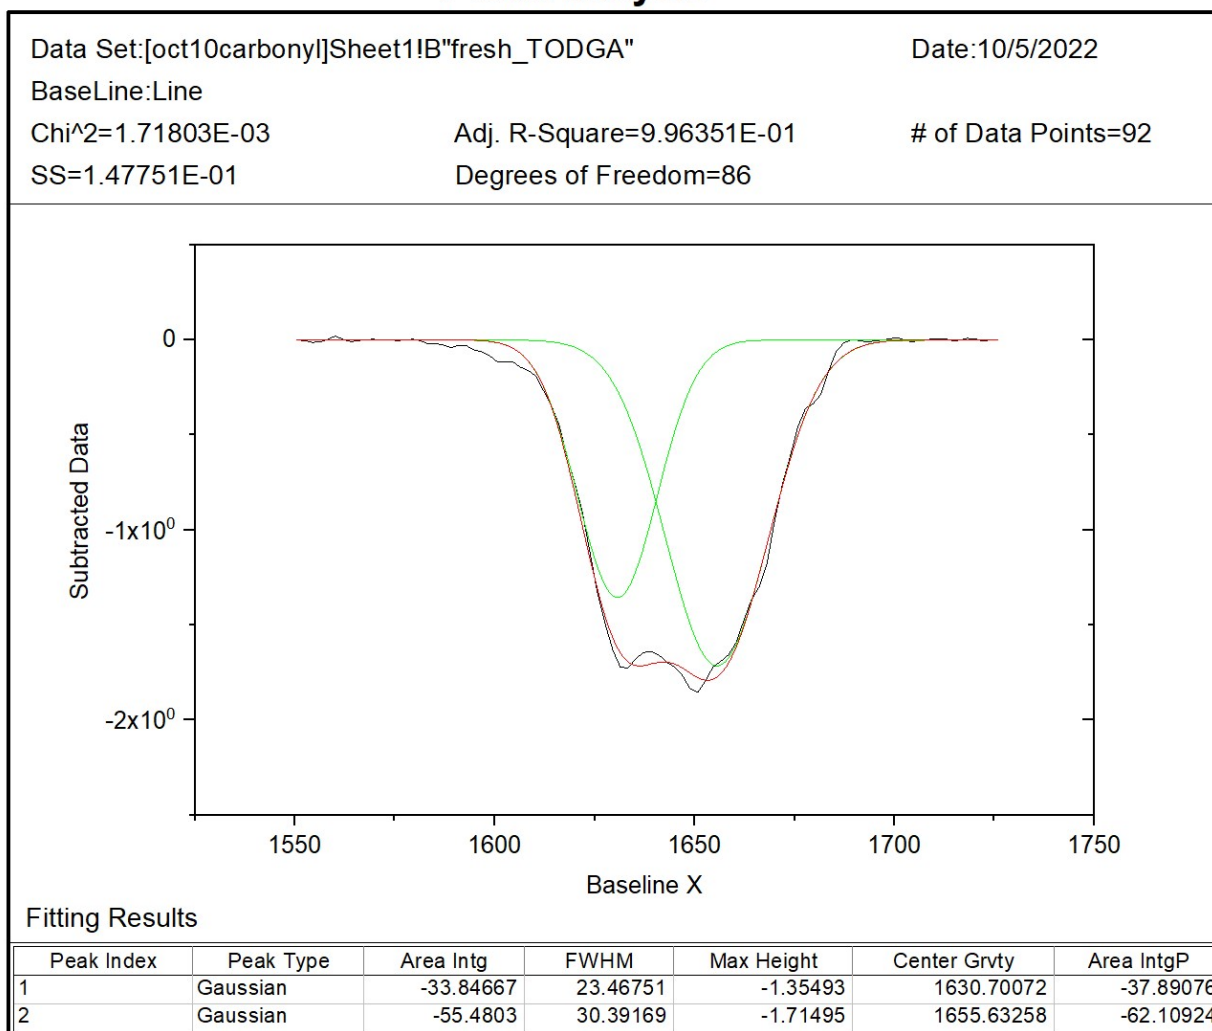

Figure S84. Peak analysis via OriginLab for 0.04 M of fresh TODGA with 10 vol% 1-octanol in n-dodecane.

## Peak Analysis

Data Set:[oct10carbonyl]Sheet1!C"preeqm\_TODGA"

Date:10/5/2022

BaseLine:Line

Chi^2=1.54838E-03

Adj. R-Square=9.98074E-01

# of Data Points=92

SS=1.33161E-01

Degrees of Freedom=86

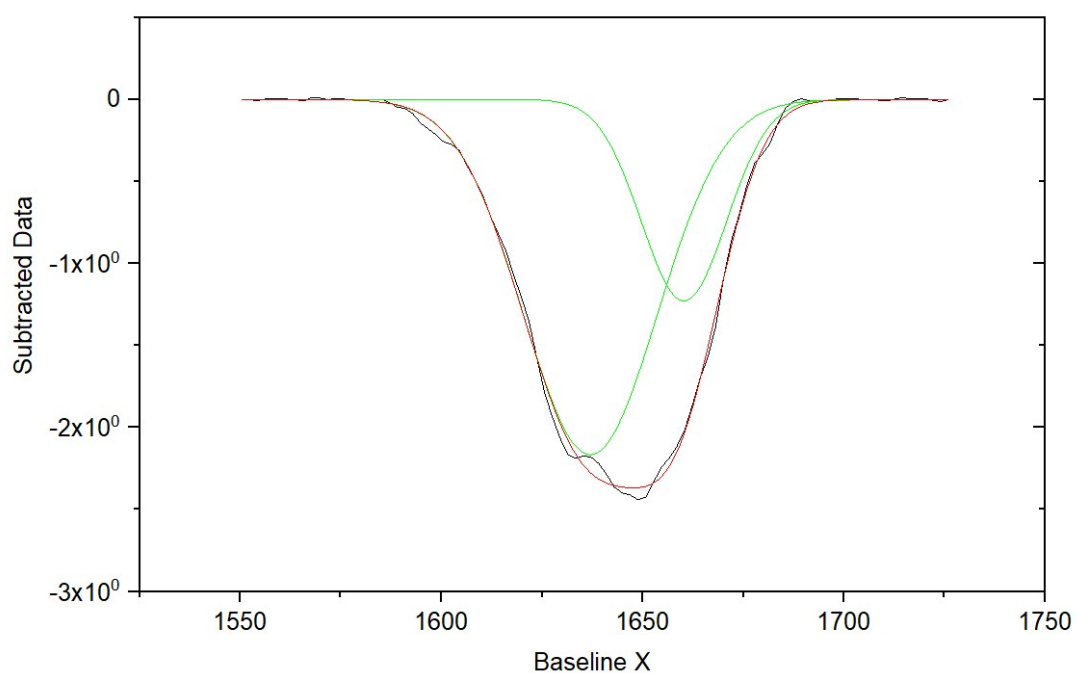

### Fitting Results

| Peak Index | Peak Type | Area Intg | FWHM     | Max Height | Center Grvty | Area IntgP |
|------------|-----------|-----------|----------|------------|--------------|------------|
| 1          | Gaussian  | -90.23387 | 39.13737 | -2.16594   | 1637.00448   | -73.47699  |
| 2          | Gaussian  | -32.57175 | 24.91763 | -1.22801   | 1660.25993   | -26.52301  |

Figure S85. Peak analysis via OriginLab for 0.04 M of fresh TODGA with 10 vol% 1-octanol in n-dodecane after contact with 1 M  $\text{HNO}_3$ .

## Peak Analysis

Data Set:[oct10carbonyl]Sheet1!D"La"

Date:10/5/2022

BaseLine:Line

Chi^2=9.37016E-04

Adj. R-Square=9.98774E-01

# of Data Points=92

SS=8.05833E-02

Degrees of Freedom=86

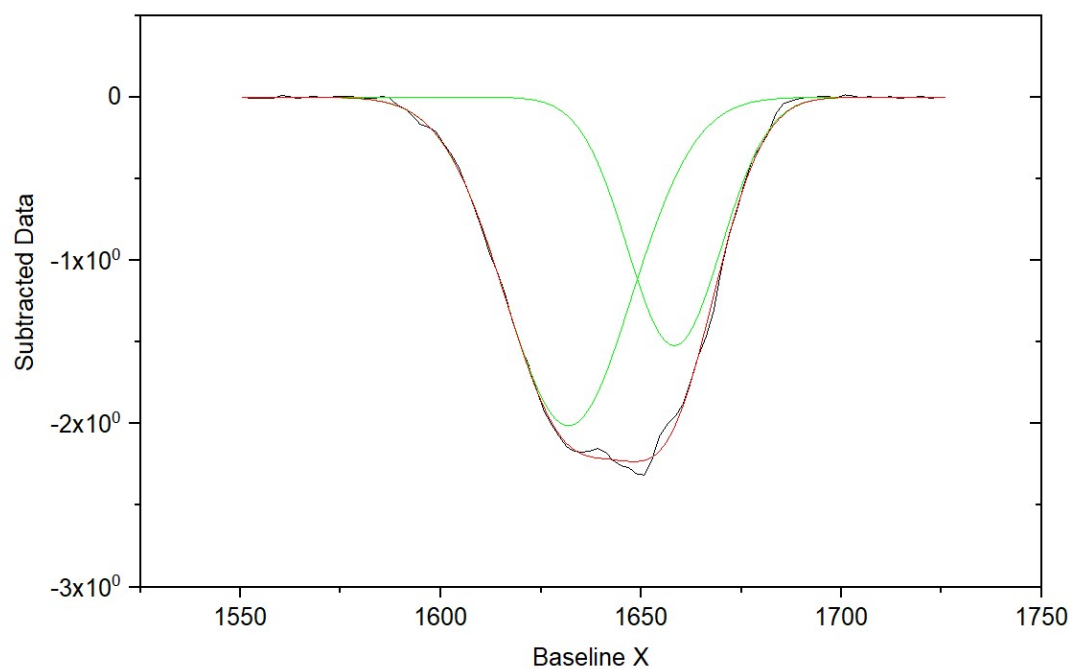

### Fitting Results

| Peak Index | Peak Type | Area Intg | FWHM     | Max Height | Center Grvty | Area IntgP |
|------------|-----------|-----------|----------|------------|--------------|------------|
| 1          | Gaussian  | -79.90759 | 37.30396 | -2.01234   | 1631.86939   | -64.17725  |
| 2          | Gaussian  | -44.60318 | 27.55343 | -1.52075   | 1658.28664   | -35.82275  |

Figure S86. Peak analysis via OriginLab for 0.04 M TODGA with 10 vol% 1-octanol in n-dodecane after contact with 3 mM  $\text{La}(\text{NO}_3)_3$  in 1 M  $\text{HNO}_3$ .

## Peak Analysis

Data Set:[oct10carbonyl]Sheet1!E"Ce"

Date:10/5/2022

BaseLine:Line

Chi^2=8.38530E-04

Adj. R-Square=9.98934E-01

# of Data Points=92

SS=7.21136E-02

Degrees of Freedom=86

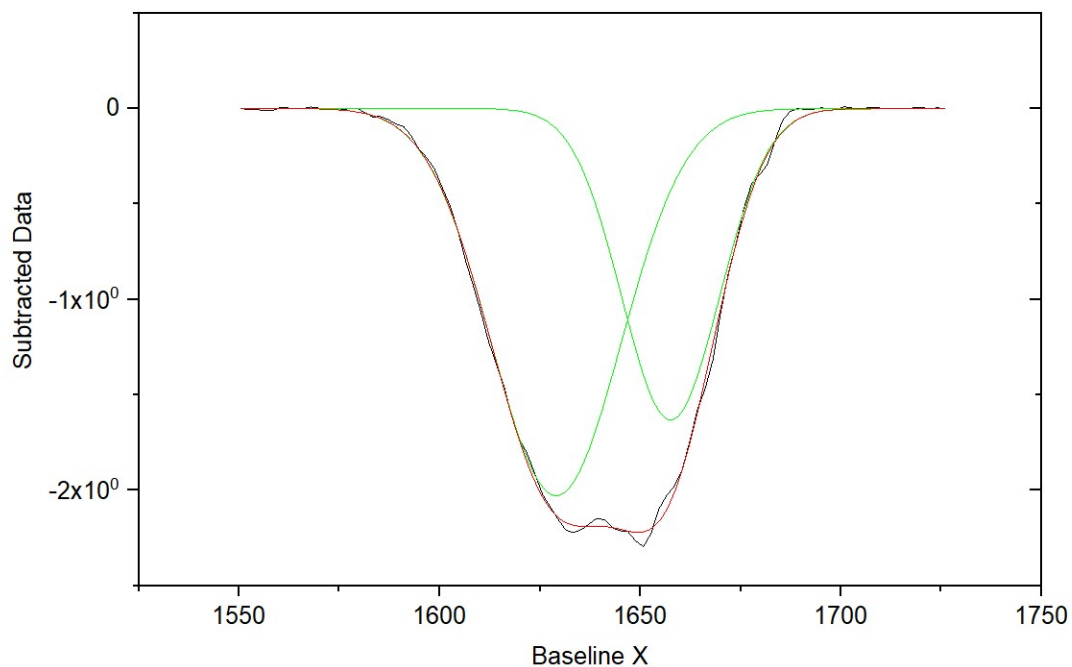

### Fitting Results

| Peak Index | Peak Type | Area Intg | FWHM     | Max Height | Center Grvty | Area IntgP |
|------------|-----------|-----------|----------|------------|--------------|------------|
| 1          | Gaussian  | -82.14572 | 38.05901 | -2.02766   | 1629.06988   | -62.27076  |
| 2          | Gaussian  | -49.77128 | 28.67867 | -1.63038   | 1657.56986   | -37.72924  |

Figure S87. Peak analysis via OriginLab for 0.04 M TODGA with 10 vol% 1-octanol in n-dodecane after contact with 3 mM  $\text{Ce}(\text{NO}_3)_3$  in 1 M  $\text{HNO}_3$ .

## Peak Analysis

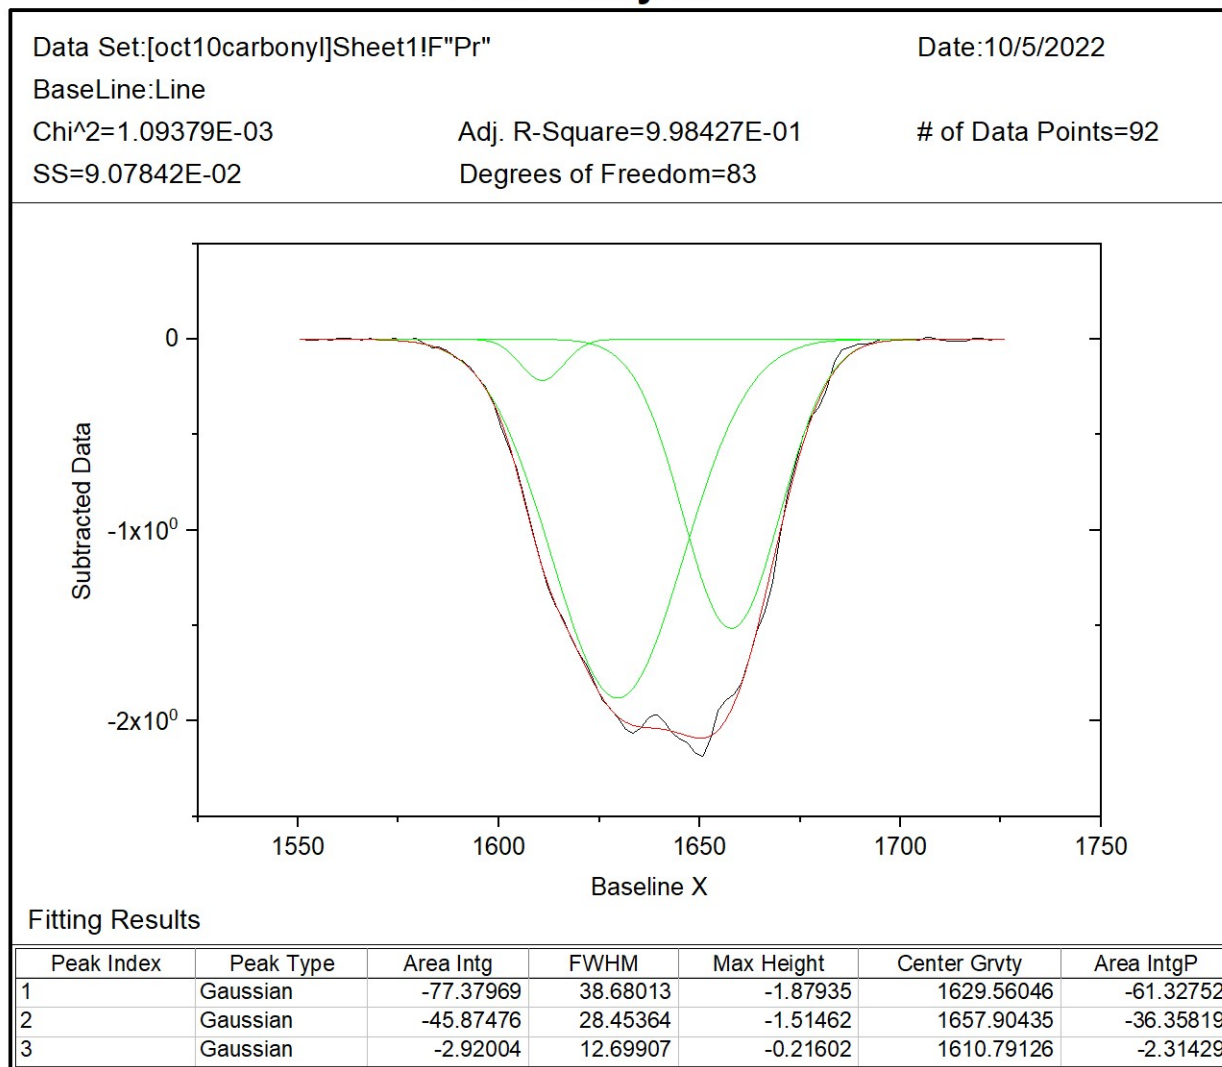

Figure S88. Peak analysis via OriginLab for 0.04 M TODGA with 10 vol% 1-octanol in n-dodecane after contact with 3 mM Pr(NO<sub>3</sub>)<sub>3</sub> in 1 M HNO<sub>3</sub>.

## Peak Analysis

Data Set:[oct10carbonyl]Sheet1!G"Nd"

Date:10/5/2022

BaseLine:Line

Chi<sup>2</sup>=1.37711E-03

Adj. R-Square=9.98174E-01

# of Data Points=92

SS=1.14300E-01

Degrees of Freedom=83

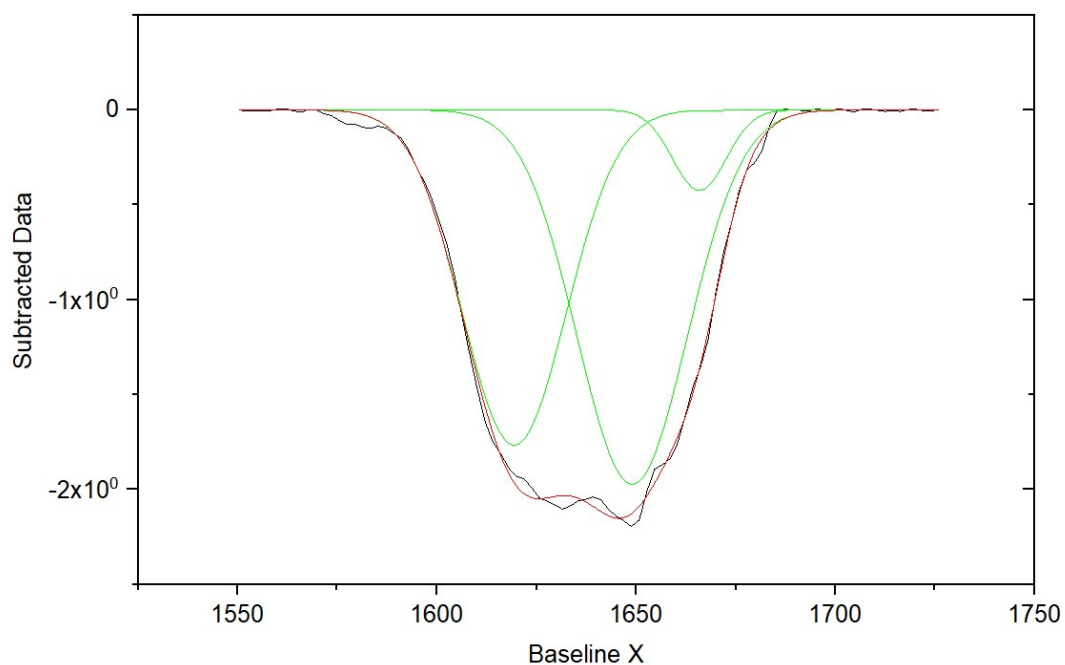

Fitting Results

| Peak Index | Peak Type | Area Intg | FWHM     | Max Height | Center Grvty | Area IntgP |
|------------|-----------|-----------|----------|------------|--------------|------------|
| 1          | Gaussian  | -68.37624 | 32.55632 | -1.97305   | 1649.03769   | -51.33412  |
| 2          | Gaussian  | -7.15303  | 15.84334 | -0.42414   | 1665.90623   | -5.37021   |
| 3          | Gaussian  | -57.66916 | 30.66367 | -1.7668    | 1619.43621   | -43.29567  |

Figure S89. Peak analysis via OriginLab for 0.04 M TODGA with 10 vol% 1-octanol in n-dodecane after contact with 3 mM Nd(NO<sub>3</sub>)<sub>3</sub> in 1 M HNO<sub>3</sub>.



## Peak Analysis

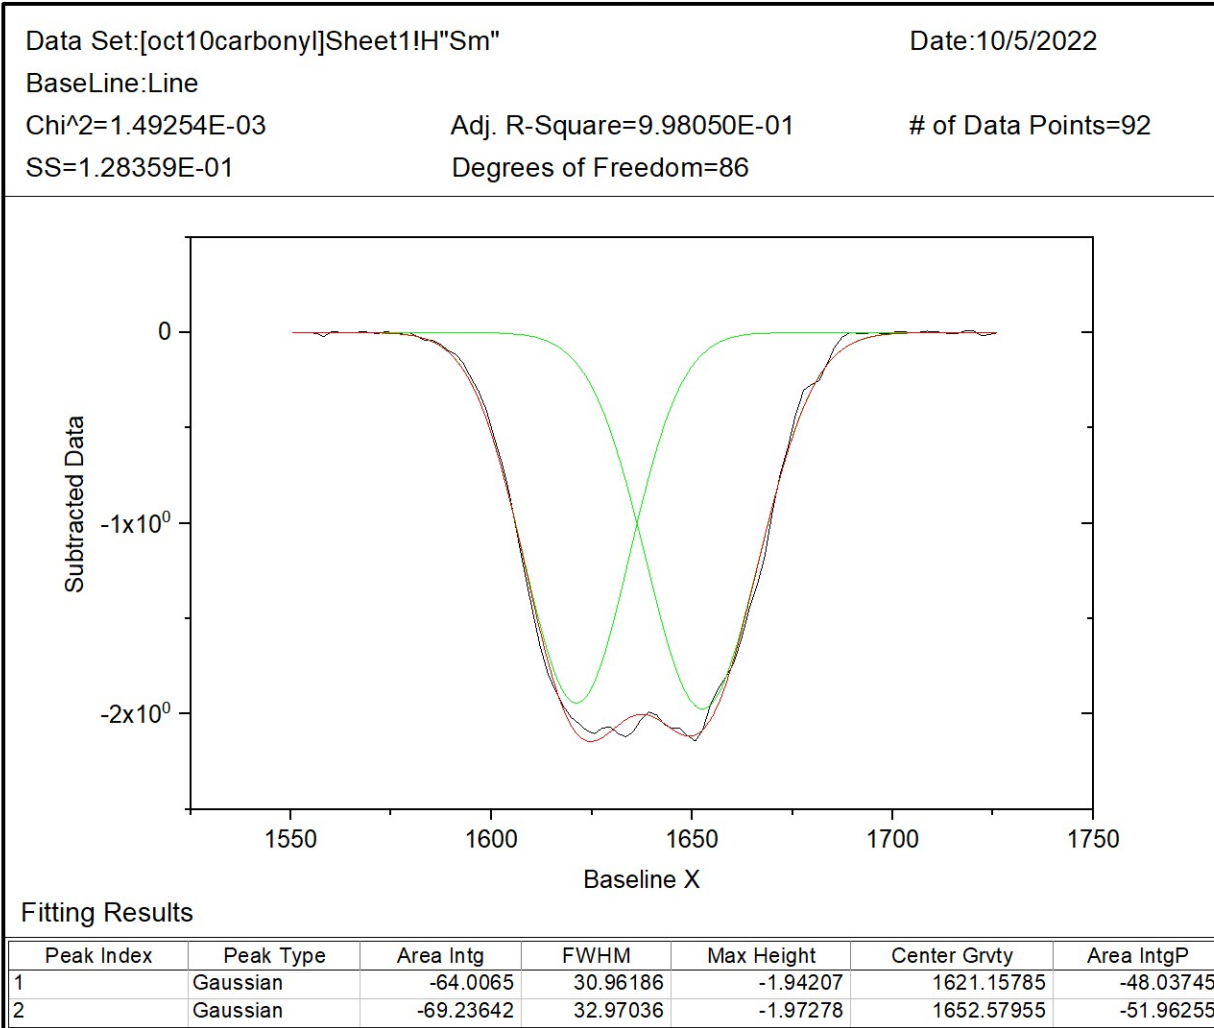

Figure S90. Peak analysis via OriginLab for 0.04 M TODGA with 10 vol% 1-octanol in n-dodecane after contact with 3 mM Sm(NO<sub>3</sub>)<sub>3</sub> in 1 M HNO<sub>3</sub>.

## Peak Analysis

Data Set:[oct10carbonyl]Sheet1!!"Eu"

Date:10/5/2022

BaseLine:Line

Chi<sup>2</sup>=1.29486E-03

Adj. R-Square=9.97894E-01

# of Data Points=92

SS=1.11358E-01

Degrees of Freedom=86

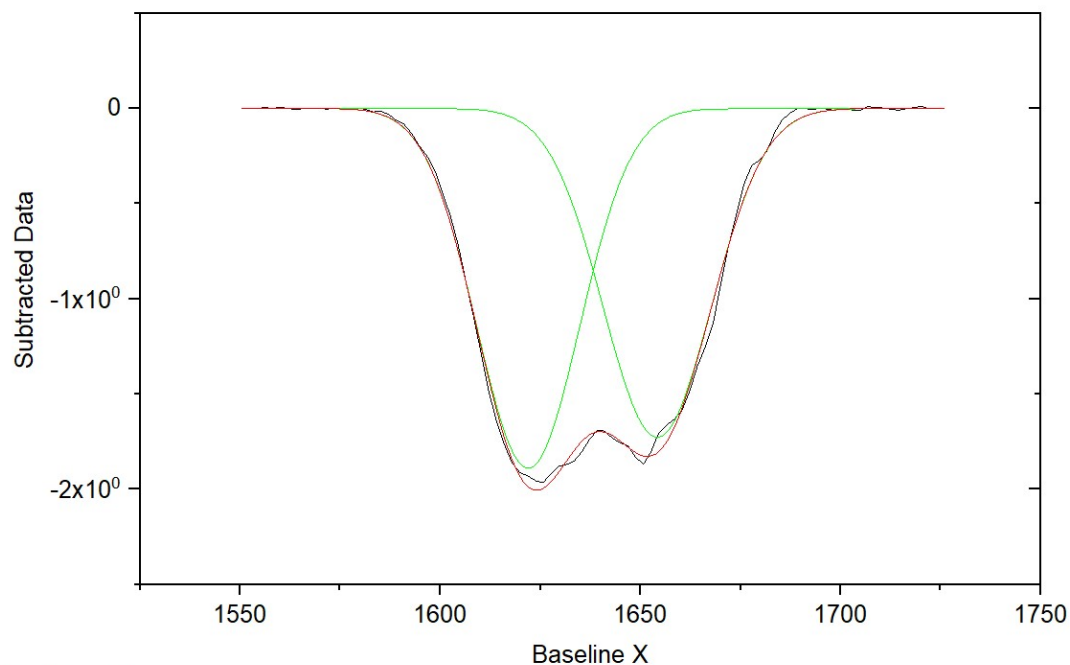

Fitting Results

| Peak Index | Peak Type | Area Intg | FWHM     | Max Height | Center Grvty | Area IntgP |
|------------|-----------|-----------|----------|------------|--------------|------------|
| 1          | Gaussian  | -60.89369 | 30.2798  | -1.88924   | 1621.98698   | -51.08651  |
| 2          | Gaussian  | -58.30351 | 31.72017 | -1.72674   | 1654.21359   | -48.91349  |

Figure S91. Peak analysis via OriginLab for 0.04 M TODGA with 10 vol% 1-octanol in n-dodecane after contact with 3 mM Eu(NO<sub>3</sub>)<sub>3</sub> in 1 M HNO<sub>3</sub>.

## Peak Analysis

Data Set:[oct10carbonyl]Sheet1!J"Gd"

Date:10/5/2022

BaseLine:Line

Chi^2=7.50950E-04

Adj. R-Square=9.98708E-01

# of Data Points=92

SS=6.45817E-02

Degrees of Freedom=86

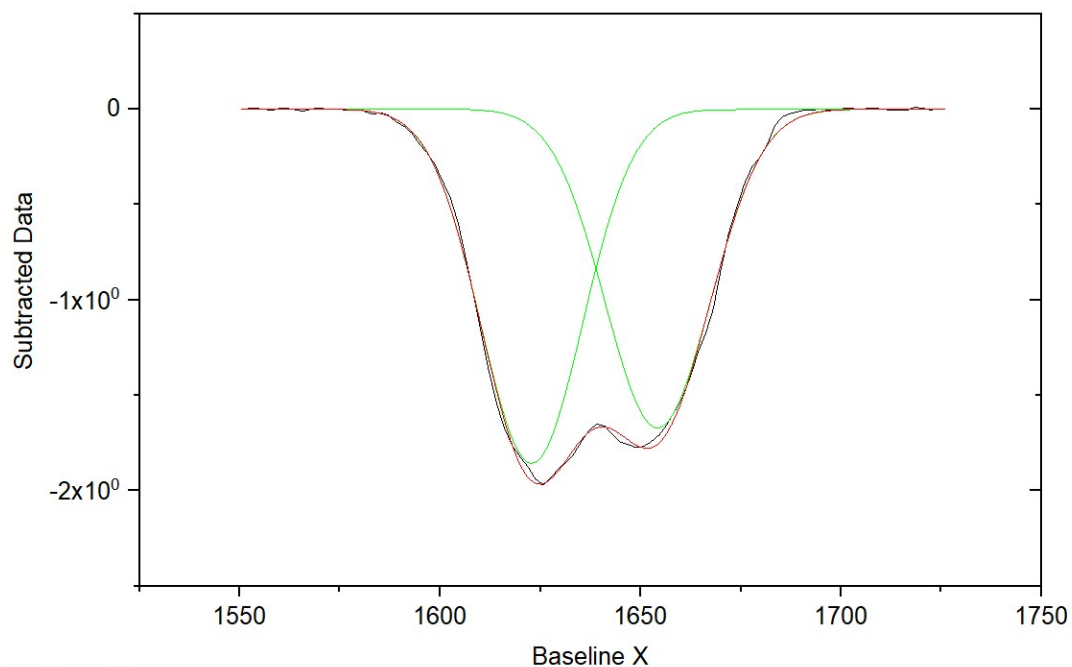

Fitting Results

| Peak Index | Peak Type | Area Intg | FWHM    | Max Height | Center Grvty | Area IntgP |
|------------|-----------|-----------|---------|------------|--------------|------------|
| 1          | Gaussian  | -59.04898 | 29.8894 | -1.85594   | 1622.82527   | -51.85202  |
| 2          | Gaussian  | -54.83082 | 30.8325 | -1.67064   | 1654.25813   | -48.14798  |

Figure S92. Peak analysis via OriginLab for 0.04 M TODGA with 10 vol% 1-octanol in n-dodecane after contact with 3 mM  $\text{Gd}(\text{NO}_3)_3$  in 1 M  $\text{HNO}_3$ .

## Peak Analysis

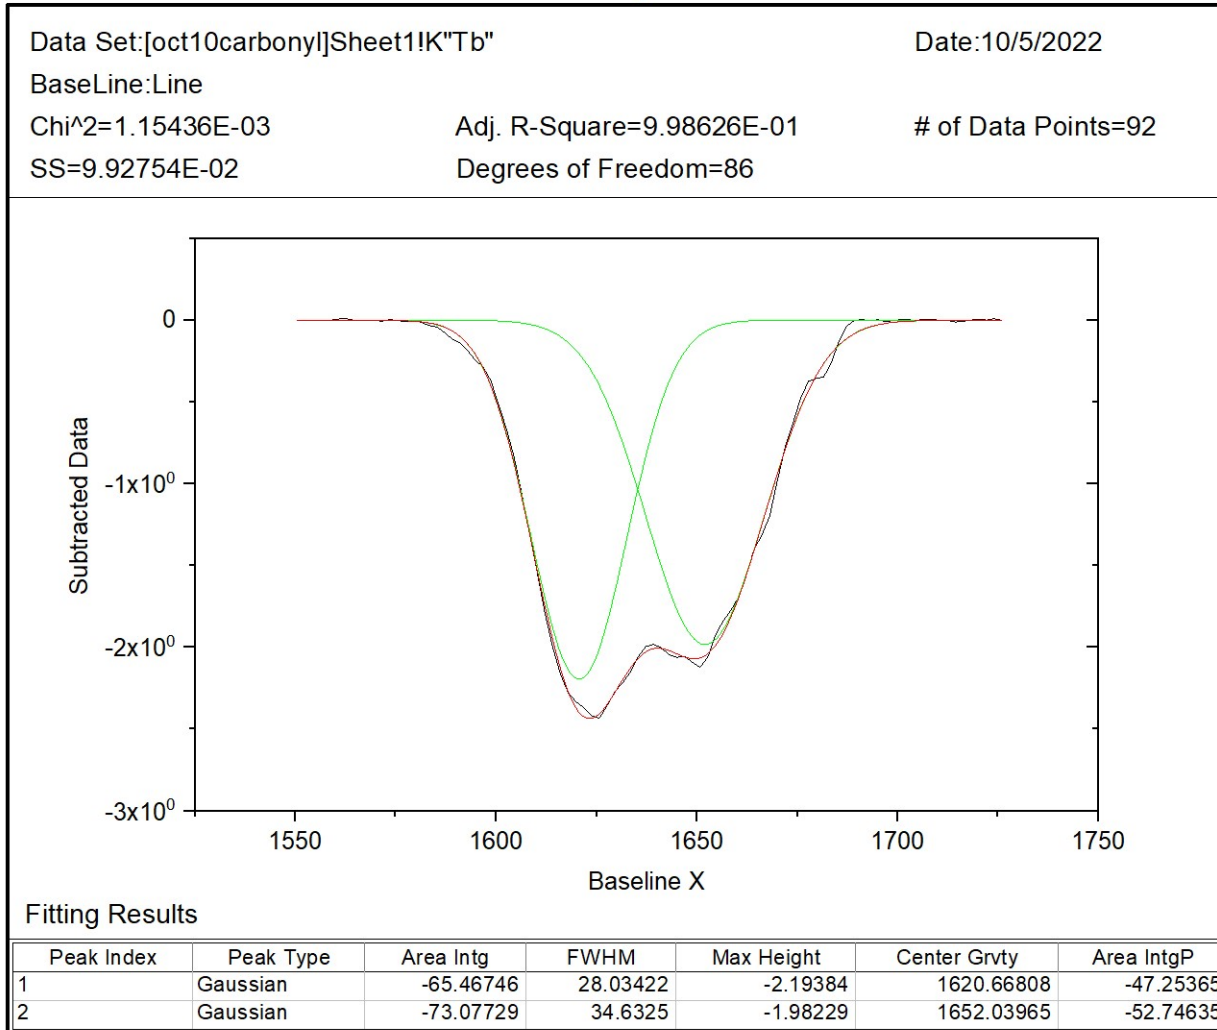

Figure S93. Peak analysis via OriginLab for 0.04 M TODGA with 10 vol% 1-octanol in n-dodecane after contact with 3 mM Tb(NO<sub>3</sub>)<sub>3</sub> in 1 M HNO<sub>3</sub>.

## Peak Analysis

Data Set:[oct10carbonyl]Sheet1!L"Dy"

Date:10/5/2022

BaseLine:Line

Chi<sup>2</sup>=1.38110E-03

Adj. R-Square=9.98169E-01

# of Data Points=92

SS=1.18774E-01

Degrees of Freedom=86

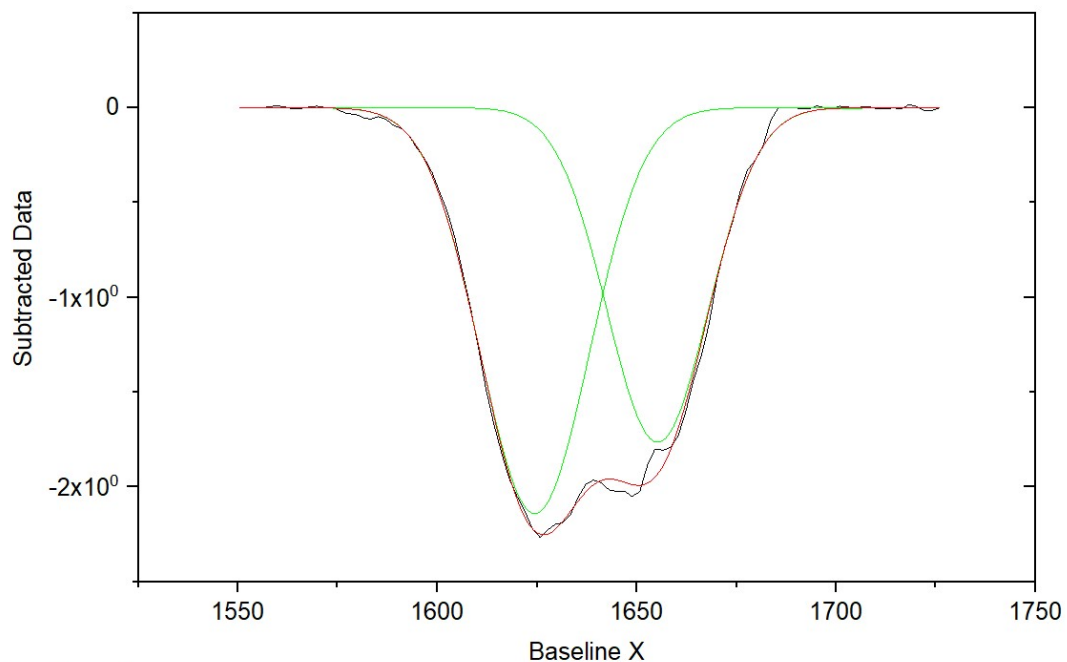

### Fitting Results

| Peak Index | Peak Type | Area Intg | FWHM     | Max Height | Center Grvty | Area IntgP |
|------------|-----------|-----------|----------|------------|--------------|------------|
| 1          | Gaussian  | -73.2561  | 32.14543 | -2.14088   | 1624.45451   | -56.59849  |
| 2          | Gaussian  | -56.17509 | 29.90832 | -1.76449   | 1655.25232   | -43.40151  |

Figure S94. Peak analysis via OriginLab for 0.04 M TODGA with 10 vol% 1-octanol in n-dodecane after contact with 3 mM Dy(NO<sub>3</sub>)<sub>3</sub> in 1 M HNO<sub>3</sub>.

## Peak Analysis

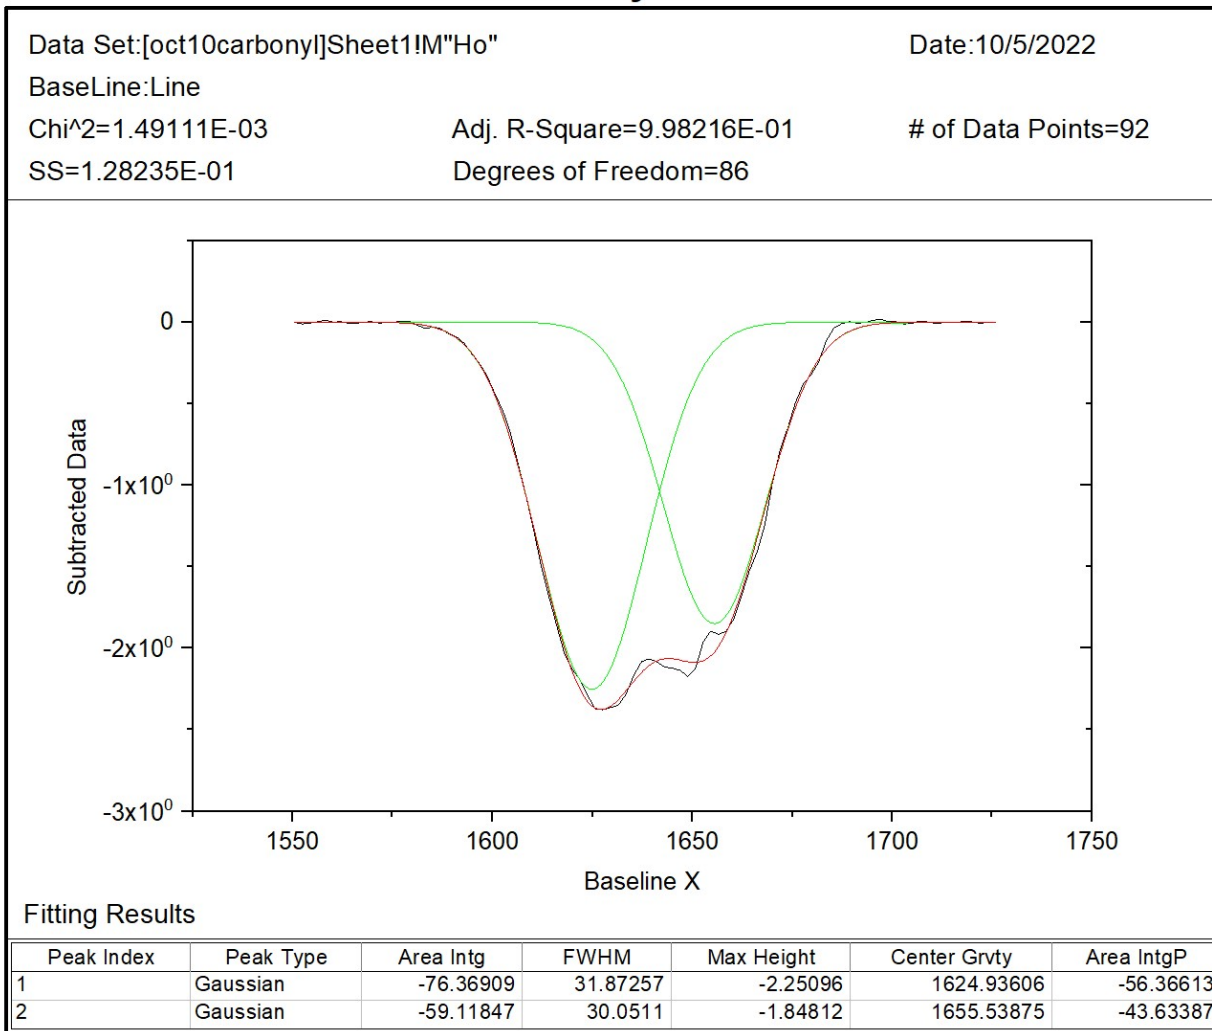

Figure S95. Peak analysis via OriginLab for 0.04 M TODGA with 10 vol% 1-octanol in n-dodecane after contact with 3 mM  $\text{Ho}(\text{NO}_3)_3$  in 1 M  $\text{HNO}_3$ .

## Peak Analysis

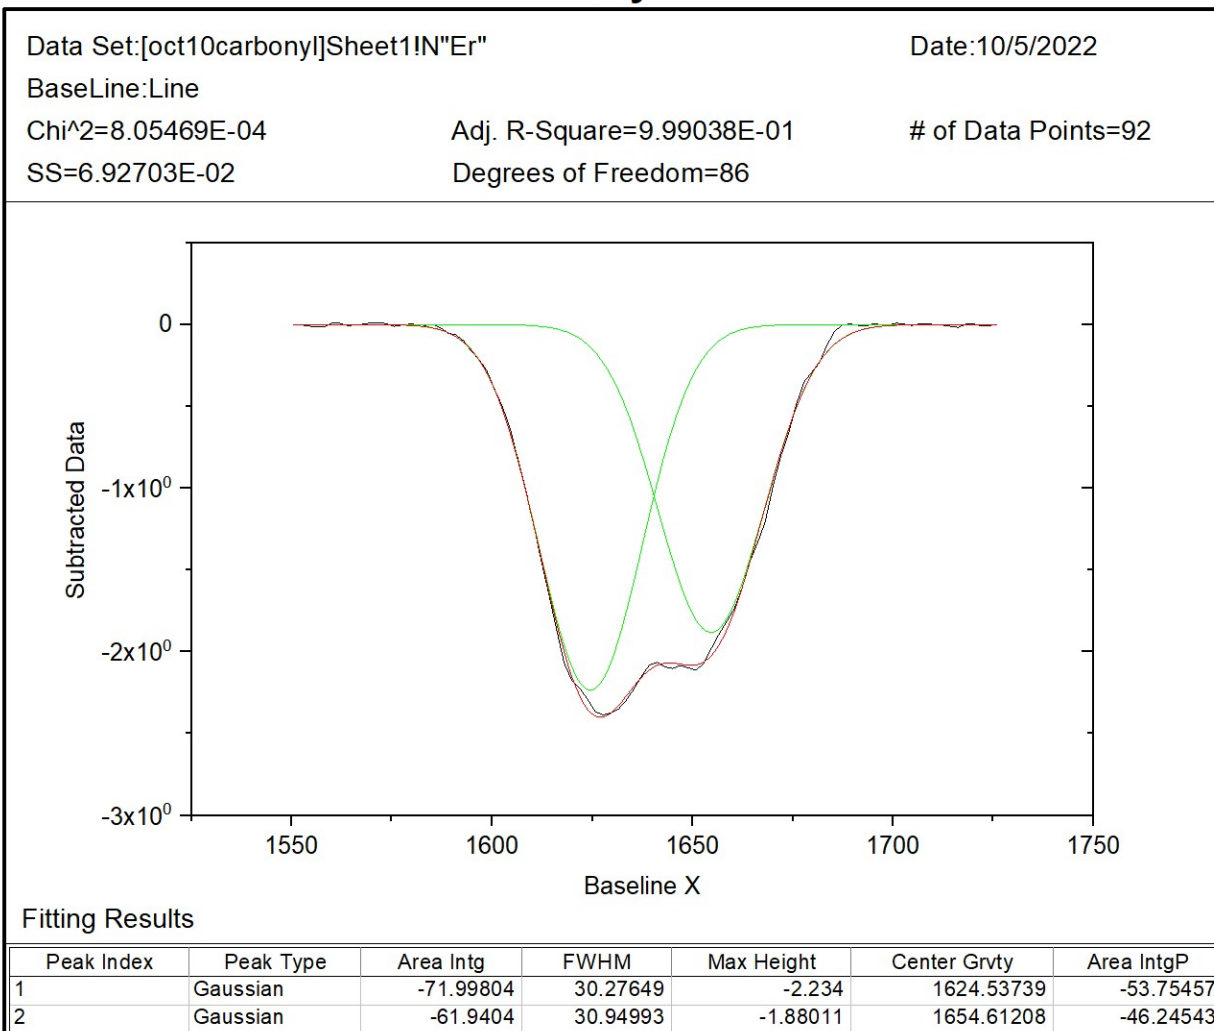

Figure S96. Peak analysis via OriginLab for 0.04 M TODGA with 10 vol% 1-octanol in n-dodecane after contact with 3 mM  $\text{Er}(\text{NO}_3)_3$  in 1 M  $\text{HNO}_3$ .

## Peak Analysis

Data Set:[oct10carbonyl]Sheet1!O"Tm"

Date:10/5/2022

BaseLine:Line

Chi^2=1.34711E-03

Adj. R-Square=9.98223E-01

# of Data Points=92

SS=1.15852E-01

Degrees of Freedom=86

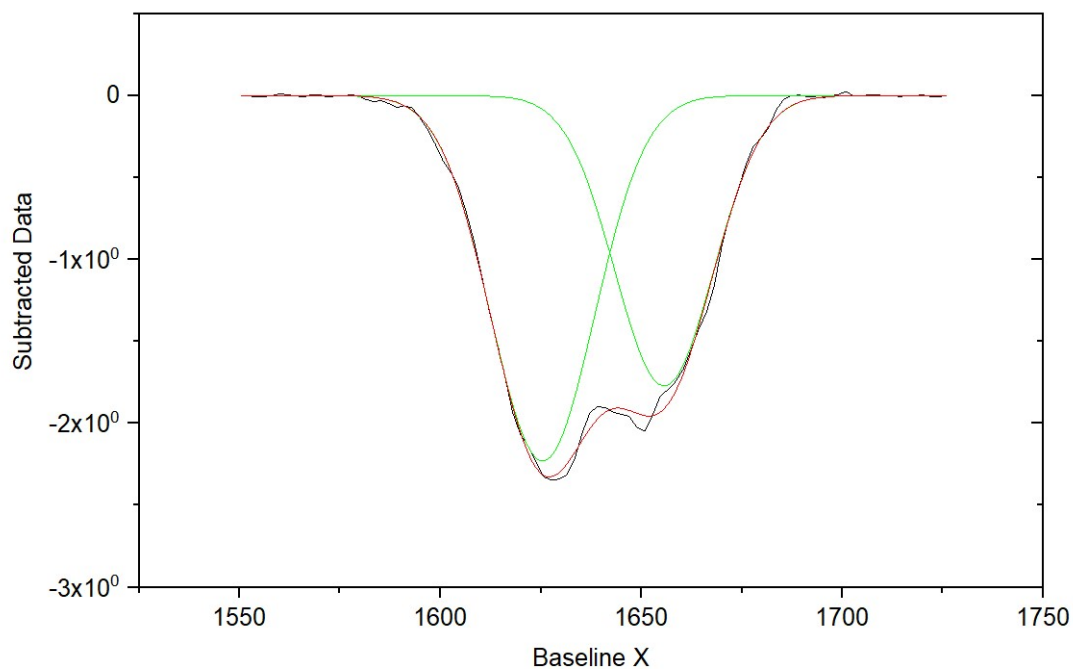

### Fitting Results

| Peak Index | Peak Type | Area Intg | FWHM     | Max Height | Center Grvty | Area IntgP |
|------------|-----------|-----------|----------|------------|--------------|------------|
| 1          | Gaussian  | -71.76681 | 30.23726 | -2.22971   | 1625.44369   | -56.9113   |
| 2          | Gaussian  | -54.33611 | 28.82324 | -1.77098   | 1655.69206   | -43.0887   |

Figure S97. Peak analysis via OriginLab for 0.04 M TODGA with 10 vol% 1-octanol in n-dodecane after contact with 3 mM Tm(NO<sub>3</sub>)<sub>3</sub> in 1 M HNO<sub>3</sub>.



## Peak Analysis

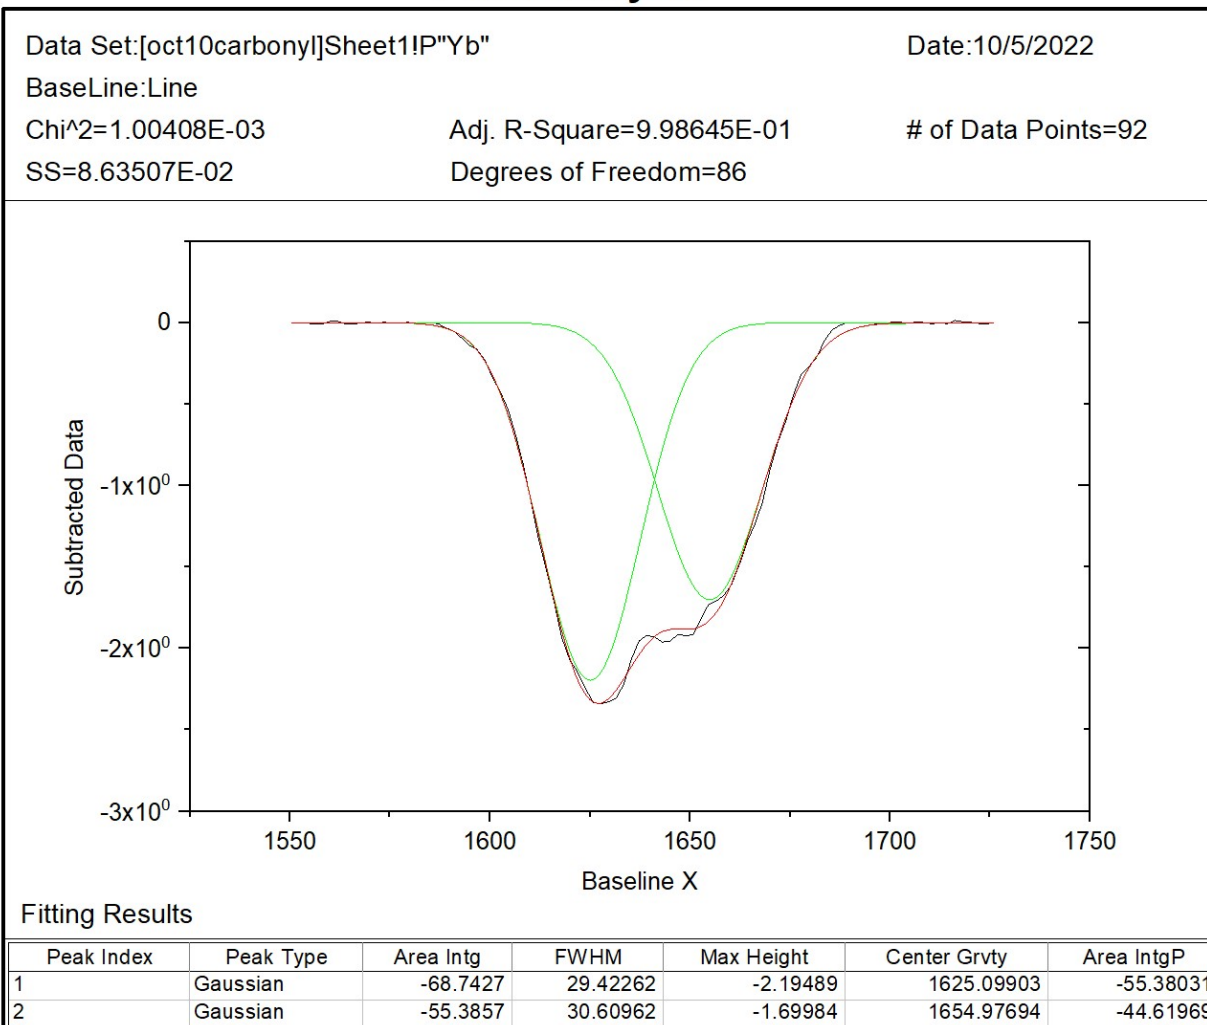

Figure S98. Peak analysis via OriginLab for 0.04 M TODGA with 10 vol% 1-octanol in n-dodecane after contact with 3 mM Yb(NO<sub>3</sub>)<sub>3</sub> in 1 M HNO<sub>3</sub>.

## Peak Analysis

Data Set:[oct10carbonyl]Sheet1!Q"Lu"

Date:10/5/2022

BaseLine:Line

Chi^2=1.56252E-03

Adj. R-Square=9.98128E-01

# of Data Points=92

SS=1.34377E-01

Degrees of Freedom=86

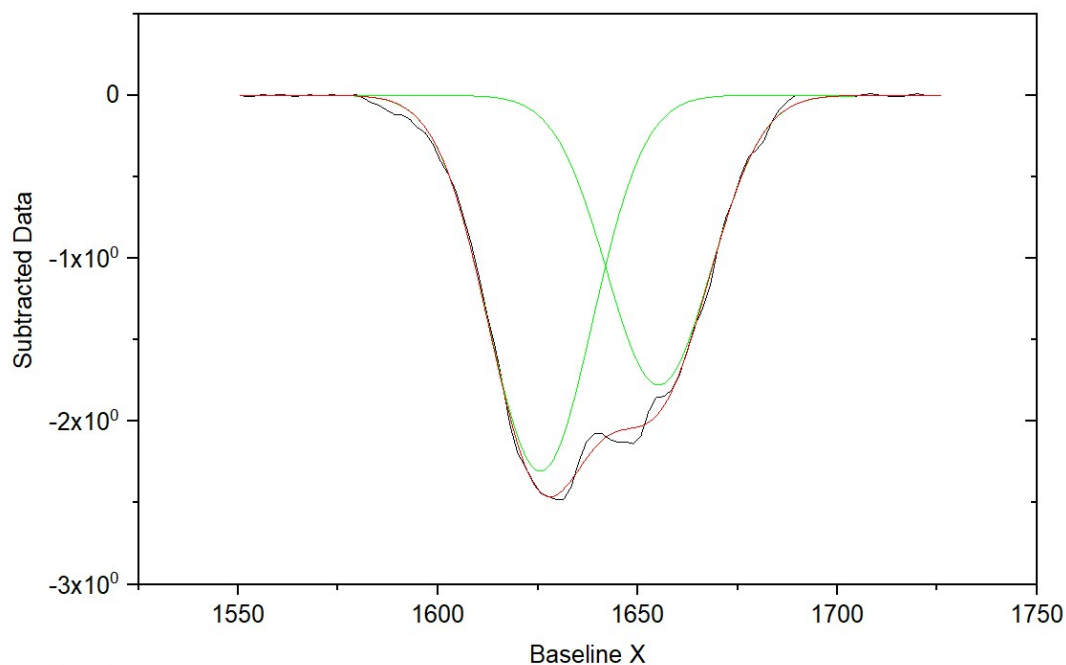

### Fitting Results

| Peak Index | Peak Type | Area Intg | FWHM     | Max Height | Center Grvty | Area IntgP |
|------------|-----------|-----------|----------|------------|--------------|------------|
| 1          | Gaussian  | -75.08683 | 30.60236 | -2.30503   | 1625.62888   | -56.46472  |
| 2          | Gaussian  | -57.89326 | 30.60298 | -1.77718   | 1655.26488   | -43.53528  |

Figure S99. Peak analysis via OriginLab for 0.04 M TODGA with 10 vol% 1-octanol in n-dodecane after contact with 3 mM  $\text{Lu}(\text{NO}_3)_3$  in 1 M  $\text{HNO}_3$ .

15 vol% 1-octanol

## Peak Analysis

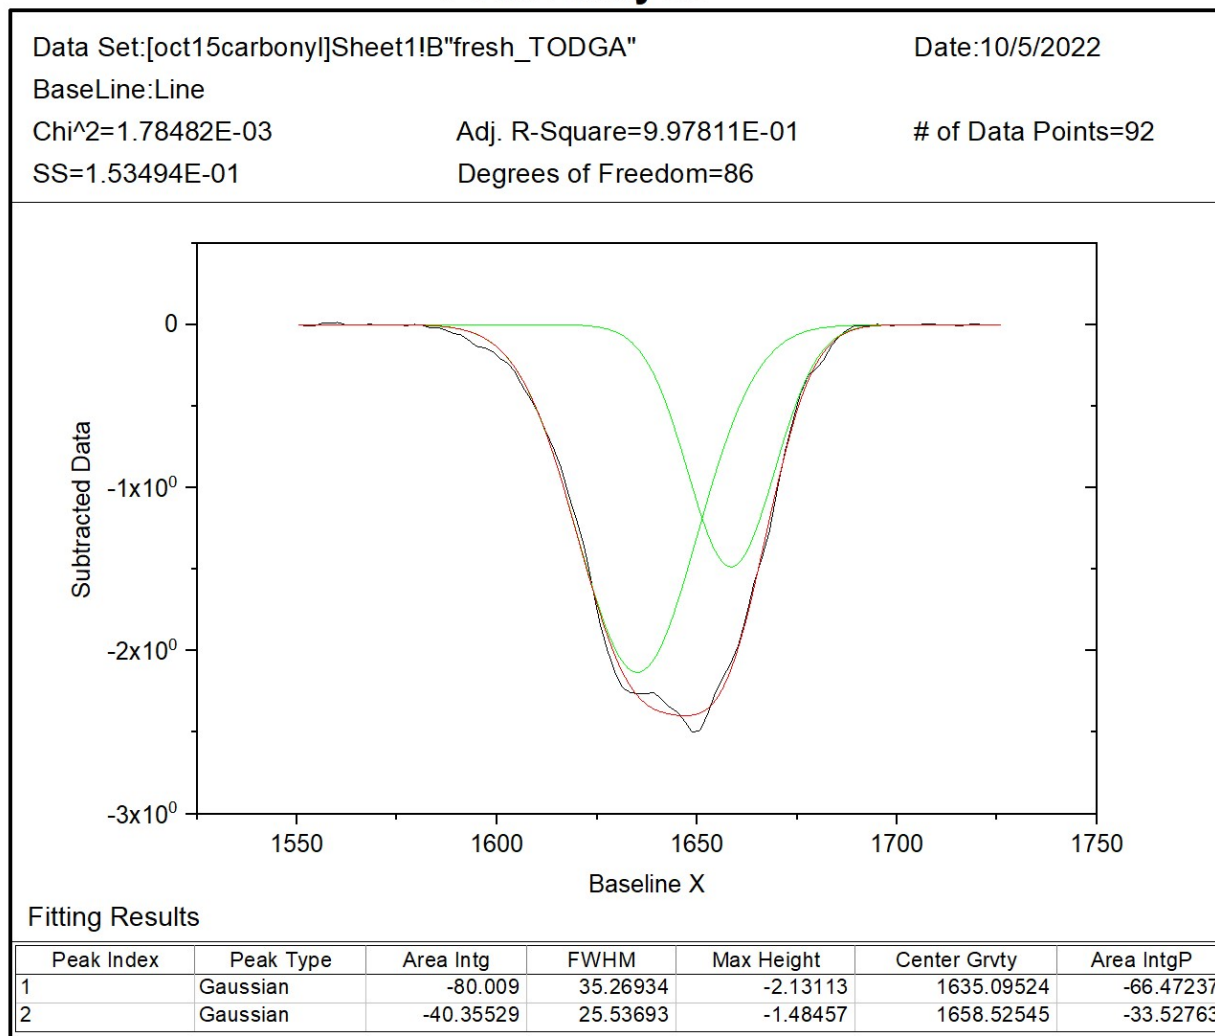

Figure S100. Peak analysis via OriginLab for 0.04 M of fresh TODGA with 15 vol% 1-octanol in n-dodecane.

## Peak Analysis

Data Set:[oct15carbonyl]Sheet1!C"preeqm\_TODGA"

Date:10/5/2022

BaseLine:Line

Chi^2=7.34620E-03

Adj. R-Square=9.91391E-01

# of Data Points=92

SS=6.53812E-01

Degrees of Freedom=89

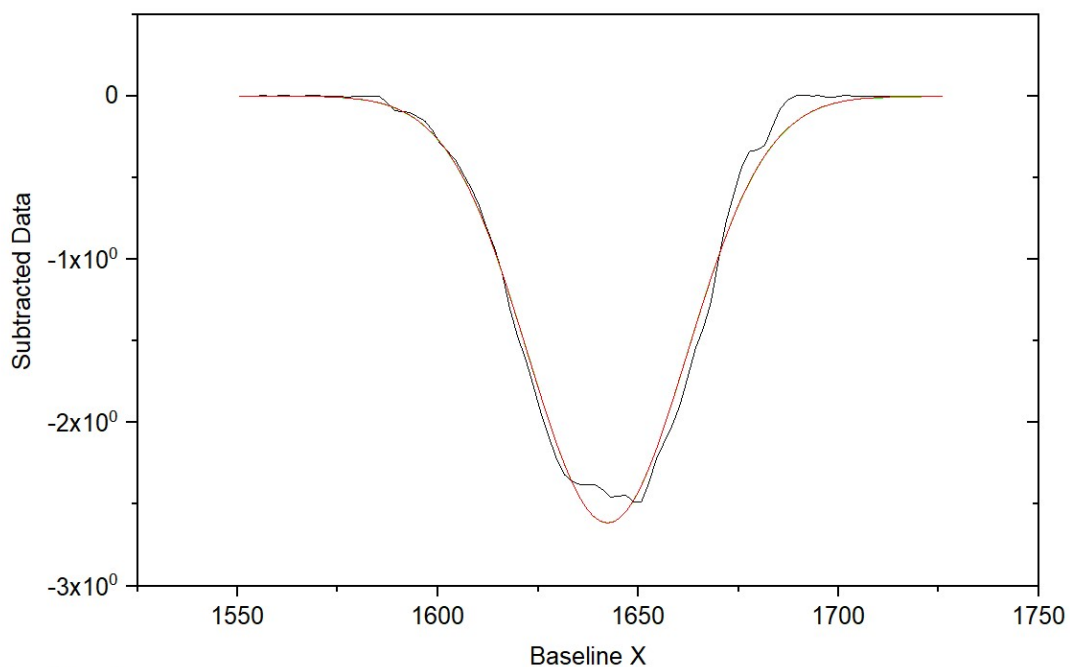

Fitting Results

| Peak Index | Peak Type | Area Intg  | FWHM     | Max Height | Center Grvty | Area IntgP |
|------------|-----------|------------|----------|------------|--------------|------------|
| 1          | Gaussian  | -129.69737 | 46.62933 | -2.61304   | 1642.32199   | -100       |

Figure S101. Peak analysis via OriginLab for 0.04 M TODGA with 15 vol% 1-octanol in n-dodecane after contact with 1 M HNO<sub>3</sub>.

## Peak Analysis

Data Set:[oct15carbonyl]Sheet1!D"La"

Date:10/5/2022

BaseLine:Line

Chi<sup>2</sup>=8.05702E-04

Adj. R-Square=9.99143E-01

# of Data Points=92

SS=6.92904E-02

Degrees of Freedom=86

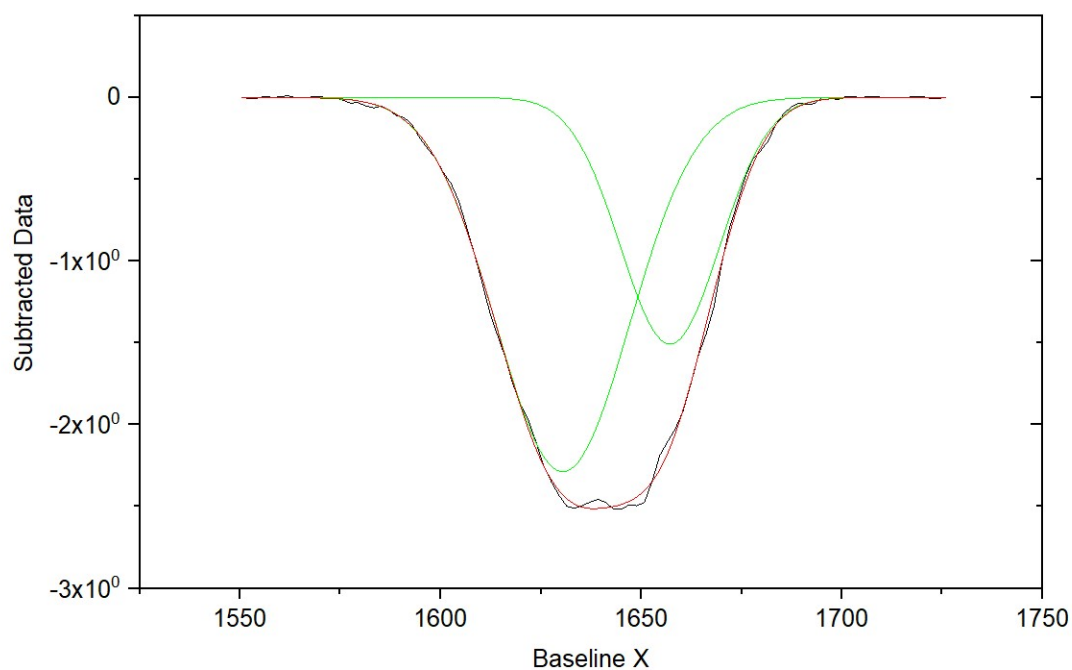

### Fitting Results

| Peak Index | Peak Type | Area Intg | FWHM     | Max Height | Center Grvty | Area IntgP |
|------------|-----------|-----------|----------|------------|--------------|------------|
| 1          | Gaussian  | -95.49319 | 39.2348  | -2.28649   | 1630.46023   | -67.24021  |
| 2          | Gaussian  | -46.5248  | 29.00502 | -1.50688   | 1657.17919   | -32.75979  |

Figure S102. Peak analysis via OriginLab for 0.04 M TODGA with 15 vol% 1-octanol in n-dodecane after contact with 3 mM La(NO<sub>3</sub>)<sub>3</sub> in 1 M HNO<sub>3</sub>.

## Peak Analysis

Data Set:[oct15carbonyl]Sheet1!E"Ce"

Date:10/5/2022

BaseLine:Line

Chi^2=1.04103E-03

Adj. R-Square=9.98860E-01

# of Data Points=92

SS=8.95283E-02

Degrees of Freedom=86

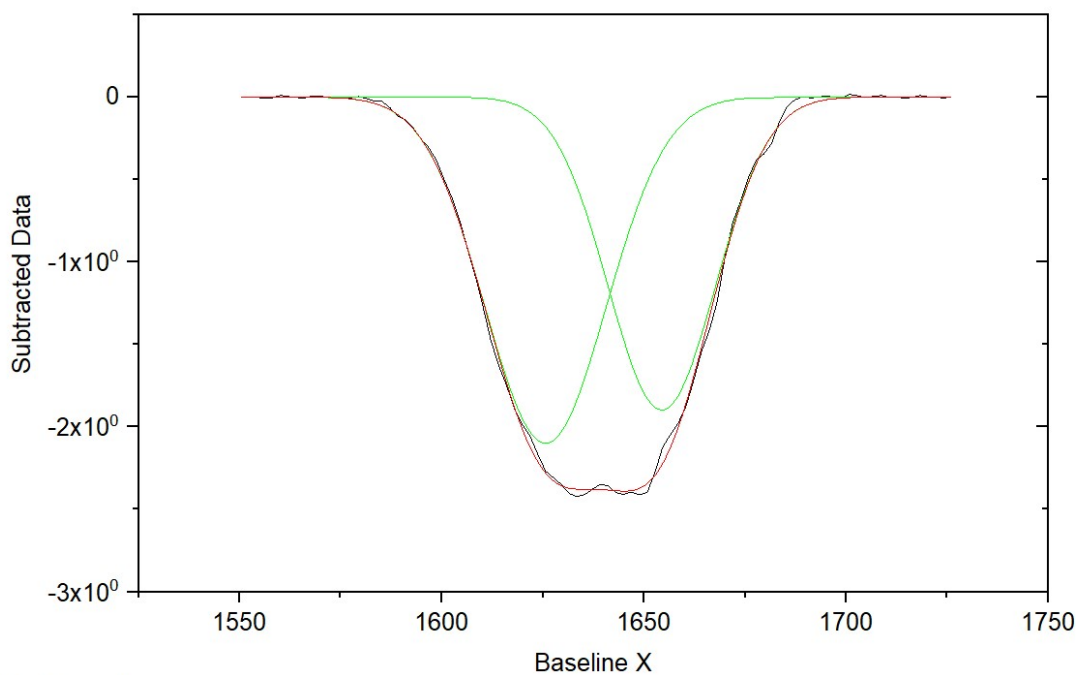

### Fitting Results

| Peak Index | Peak Type | Area Intg | FWHM     | Max Height | Center Grvty | Area IntgP |
|------------|-----------|-----------|----------|------------|--------------|------------|
| 1          | Gaussian  | -78.86432 | 35.29859 | -2.0989    | 1625.68444   | -55.58049  |
| 2          | Gaussian  | -63.02776 | 31.20894 | -1.89723   | 1654.41994   | -44.41951  |

Figure S103. Peak analysis via OriginLab for 0.04 M TODGA with 15 vol% 1-octanol in n-dodecane after contact with 3 mM  $\text{Ce}(\text{NO}_3)_3$  in 1 M  $\text{HNO}_3$ .

## Peak Analysis

Data Set:[oct15carbonyl]Sheet1!F"Pr"

Date:10/5/2022

BaseLine:Line

Chi^2=1.05339E-03

Adj. R-Square=9.98870E-01

# of Data Points=92

SS=9.05915E-02

Degrees of Freedom=86

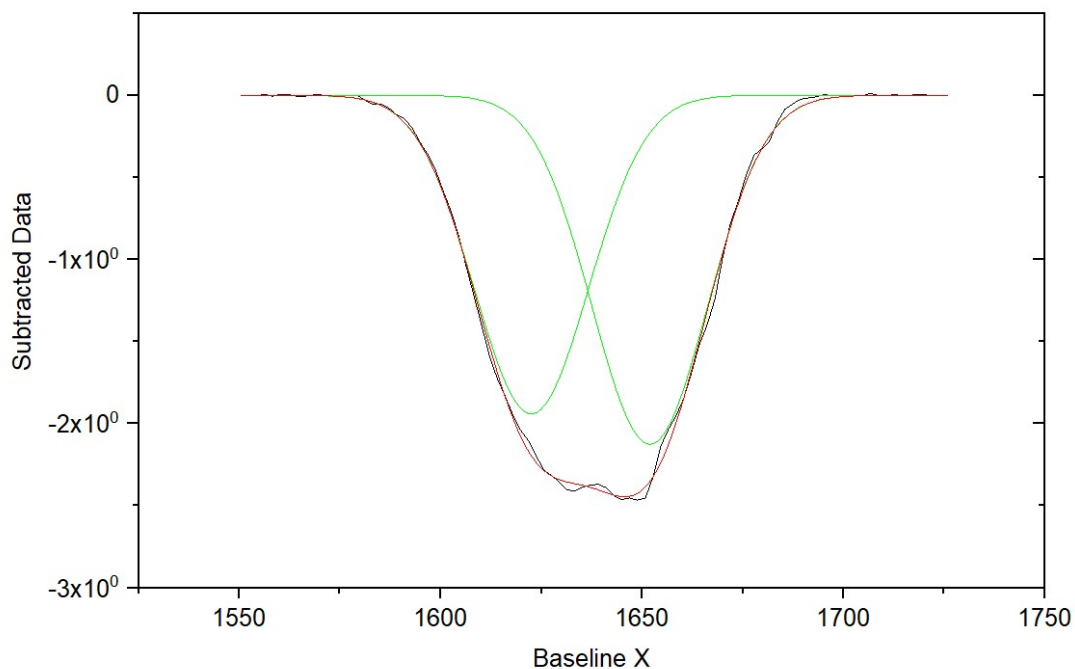

### Fitting Results

| Peak Index | Peak Type | Area Intg | FWHM     | Max Height | Center Grvty | Area IntgP |
|------------|-----------|-----------|----------|------------|--------------|------------|
| 1          | Gaussian  | -69.03872 | 33.44597 | -1.93917   | 1622.53035   | -47.51881  |
| 2          | Gaussian  | -76.24842 | 33.70763 | -2.12506   | 1651.93997   | -52.48119  |

Figure S104. Peak analysis via OriginLab for 0.04 M TODGA with 15 vol% 1-octanol in n-dodecane after contact with 3 mM Pr(NO<sub>3</sub>)<sub>3</sub> in 1 M HNO<sub>3</sub>..

## Peak Analysis

Data Set:[oct15carbonyl]Sheet1!G"Nd"

Date:10/5/2022

BaseLine:Line

Chi<sup>2</sup>=1.60883E-03

Adj. R-Square=9.98303E-01

# of Data Points=92

SS=1.38359E-01

Degrees of Freedom=86

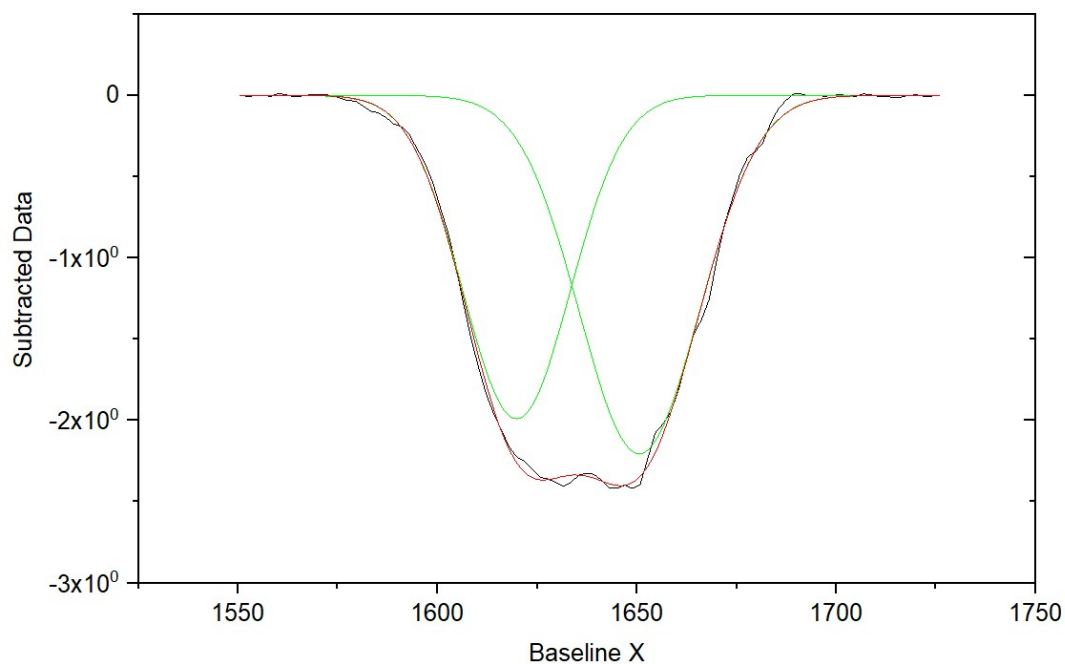

### Fitting Results

| Peak Index | Peak Type | Area Intg | FWHM     | Max Height | Center Grvty | Area IntgP |
|------------|-----------|-----------|----------|------------|--------------|------------|
| 1          | Gaussian  | -67.00132 | 31.6371  | -1.98955   | 1619.83672   | -44.68301  |
| 2          | Gaussian  | -82.94677 | 35.35166 | -2.20423   | 1650.61474   | -55.31699  |

Figure S105. Peak analysis via OriginLab for 0.04 M TODGA with 15 vol% 1-octanol in n-dodecane after contact with 3 mM Nd(NO<sub>3</sub>)<sub>3</sub> in 1 M HNO<sub>3</sub>.



## Peak Analysis

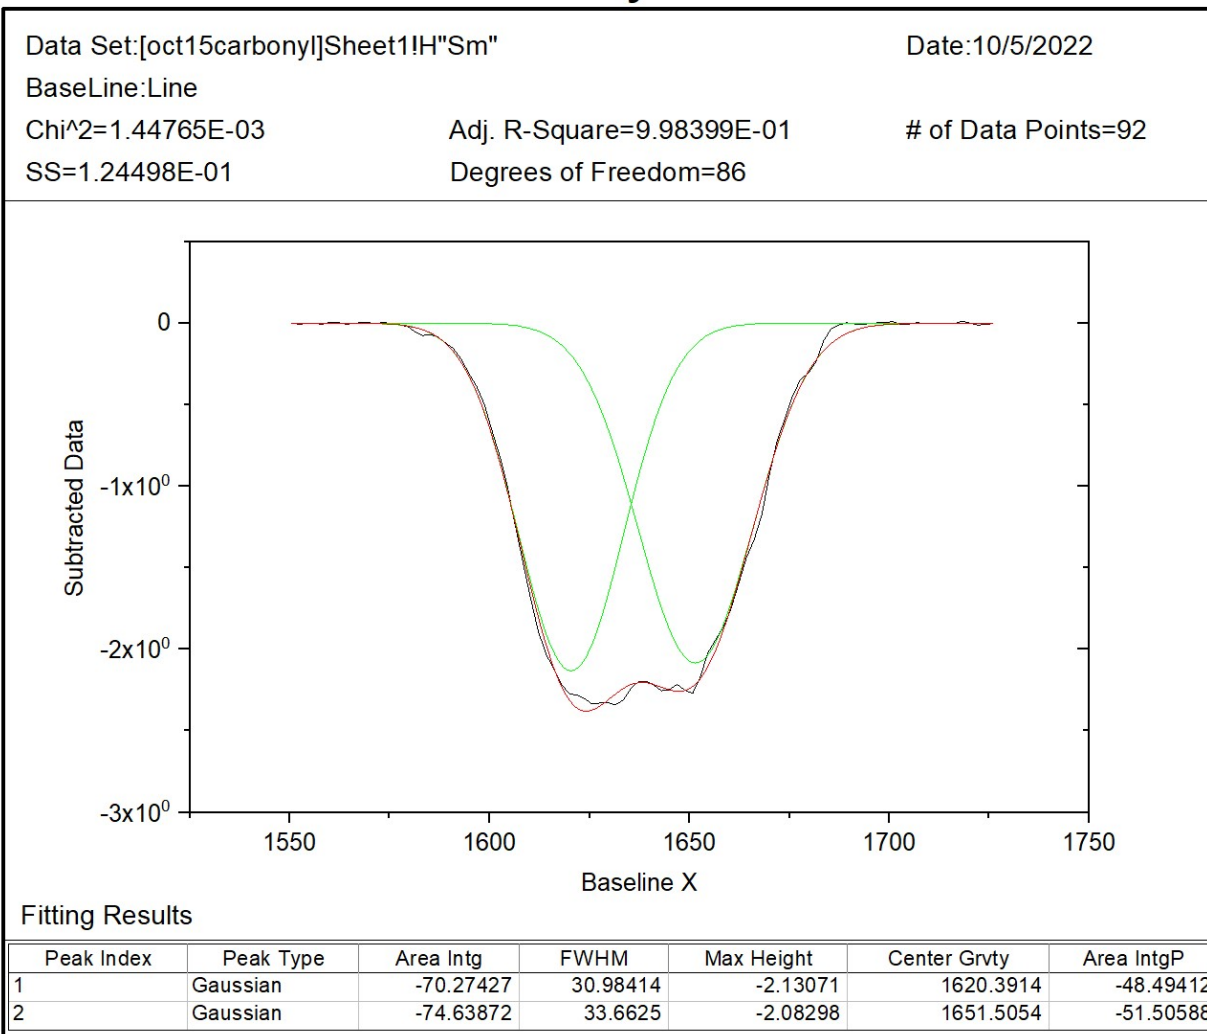

Figure S106. Peak analysis via OriginLab for 0.04 M TODGA with 15 vol% 1-octanol in n-dodecane after contact with 3 mM Sm(NO<sub>3</sub>)<sub>3</sub> in 1 M HNO<sub>3</sub>.

## Peak Analysis

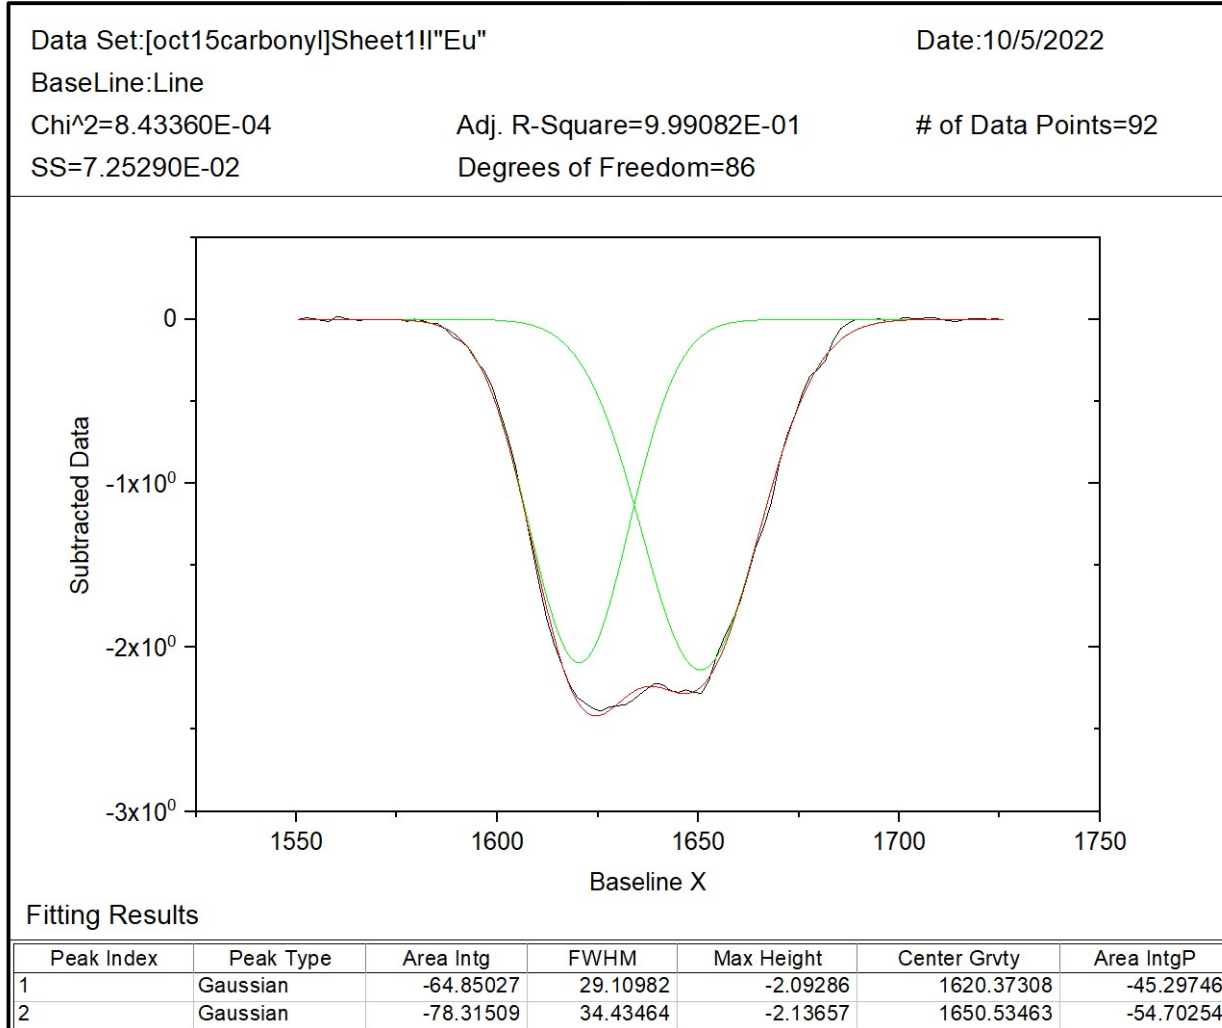

Figure S107. Peak analysis via OriginLab for 0.04 M TODGA with 15 vol% 1-octanol in n-dodecane after contact with 3 mM  $\text{Eu}(\text{NO}_3)_3$  in 1 M  $\text{HNO}_3$ .

## Peak Analysis

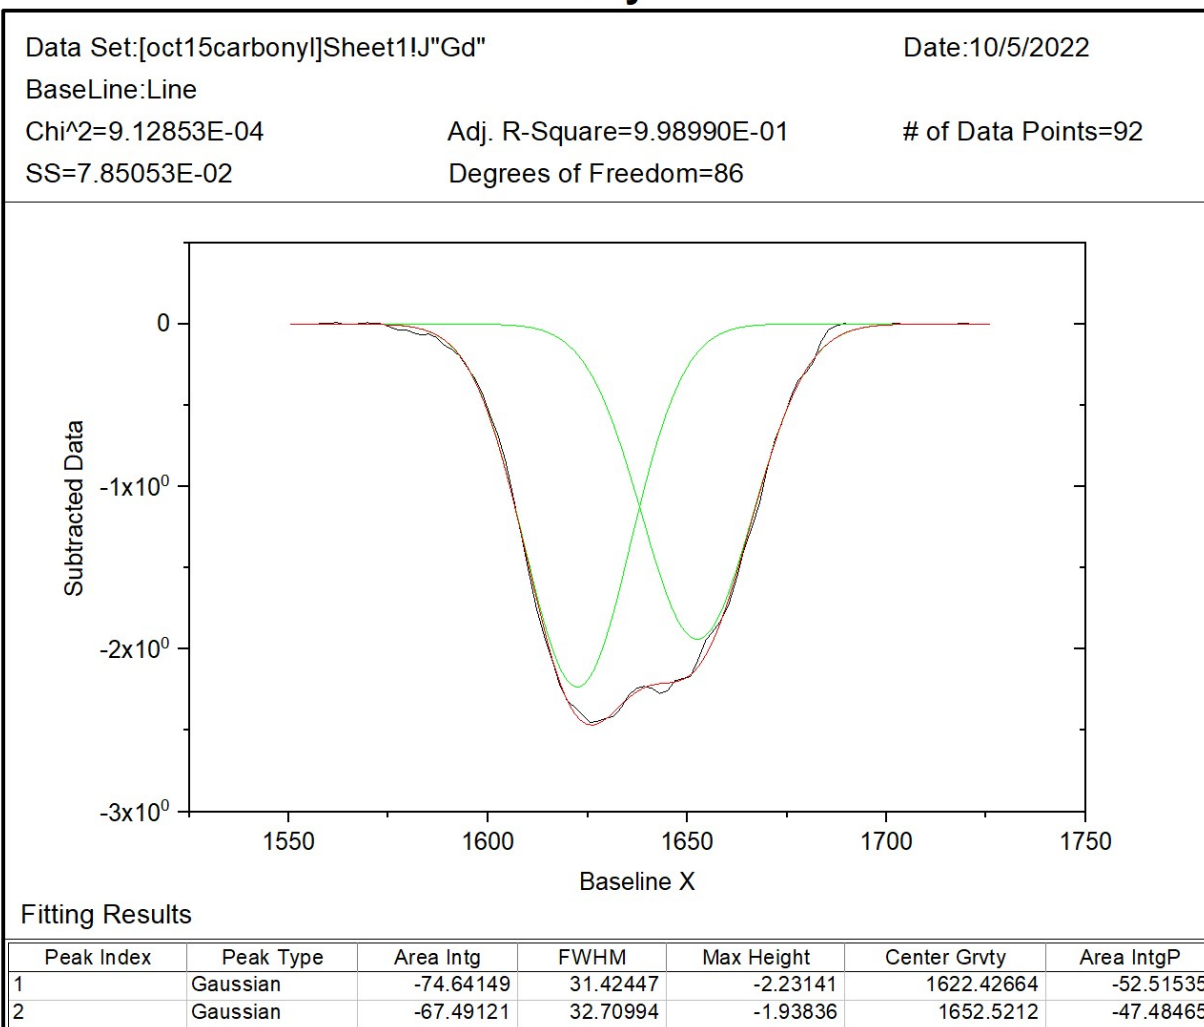

Figure S108. Peak analysis via OriginLab for 0.04 M TODGA with 15 vol% 1-octanol in n-dodecane after contact with 3 mM Gd(NO<sub>3</sub>)<sub>3</sub> in 1 M HNO<sub>3</sub>.

## Peak Analysis

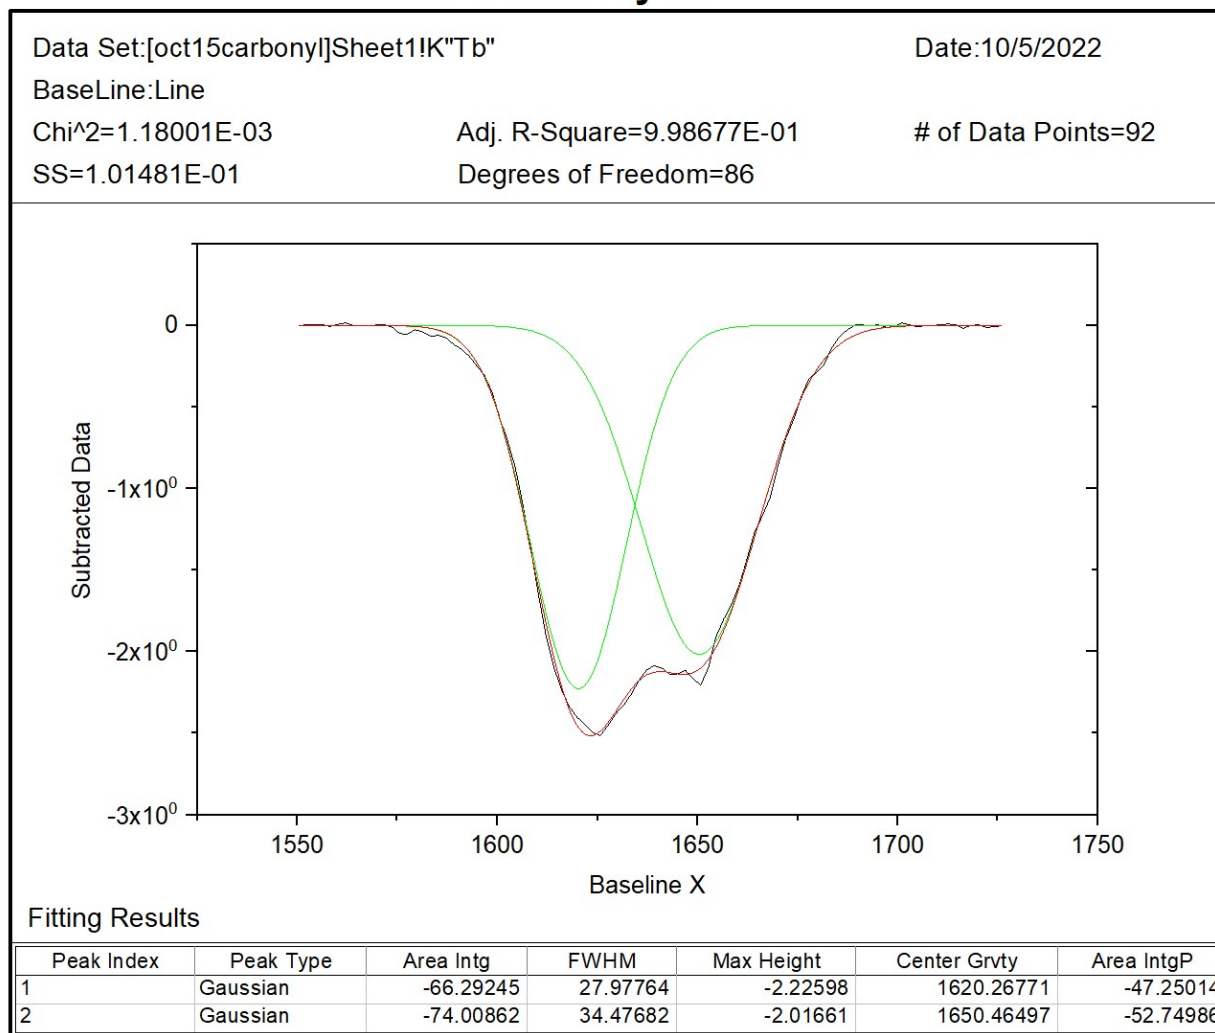

Figure S109. Peak analysis via OriginLab for 0.04 M TODGA with 15 vol% 1-octanol in n-dodecane after contact with 3 mM Tb(NO<sub>3</sub>)<sub>3</sub> in 1 M HNO<sub>3</sub>.

## Peak Analysis

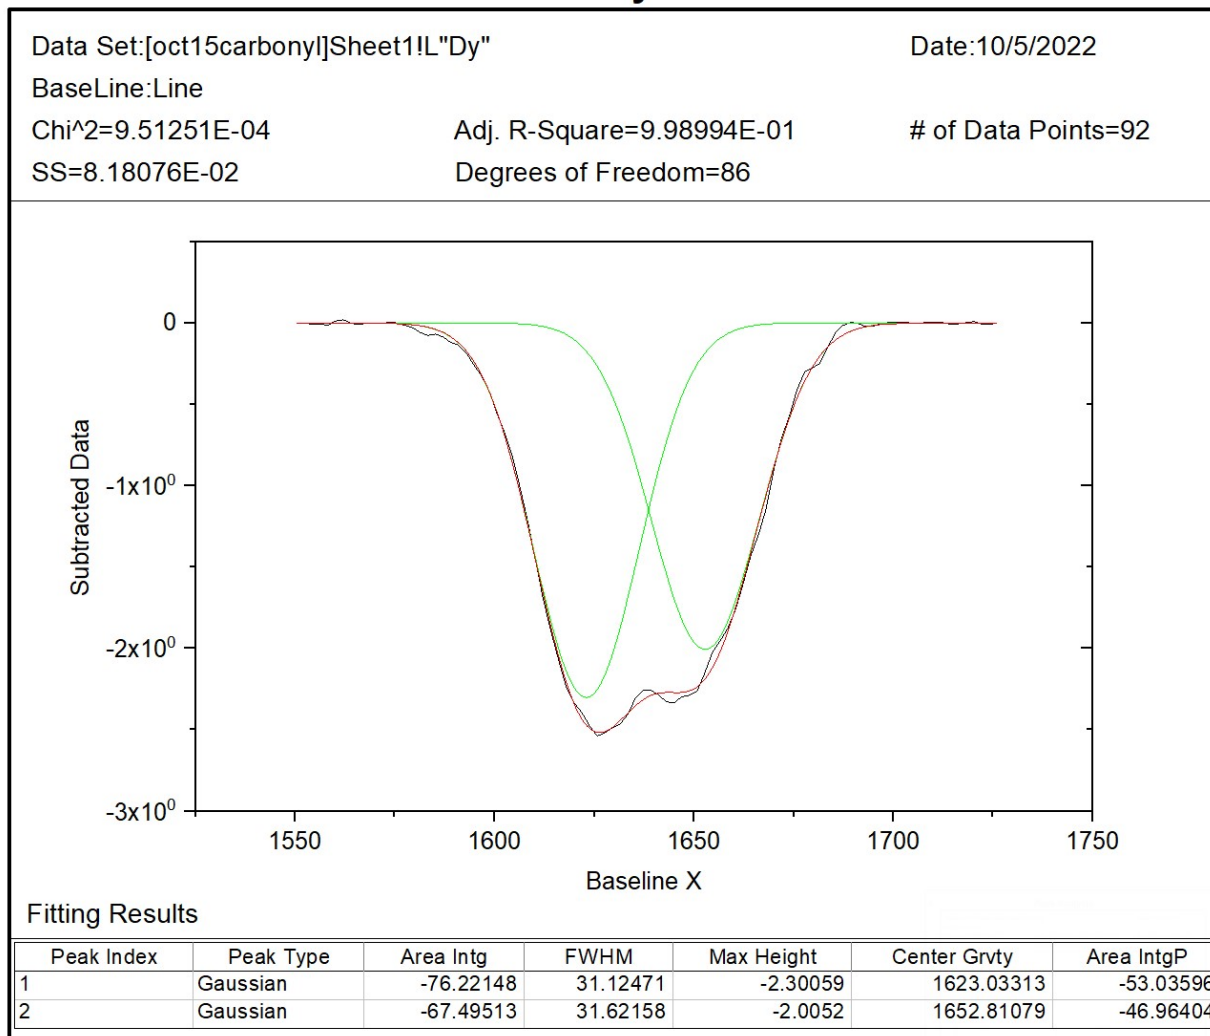

Figure S110. Peak analysis via OriginLab for 0.04 M TODGA with 15 vol% 1-octanol in n-dodecane after contact with 3 mM Dy(NO<sub>3</sub>)<sub>3</sub> in 1 M HNO<sub>3</sub>.

## Peak Analysis

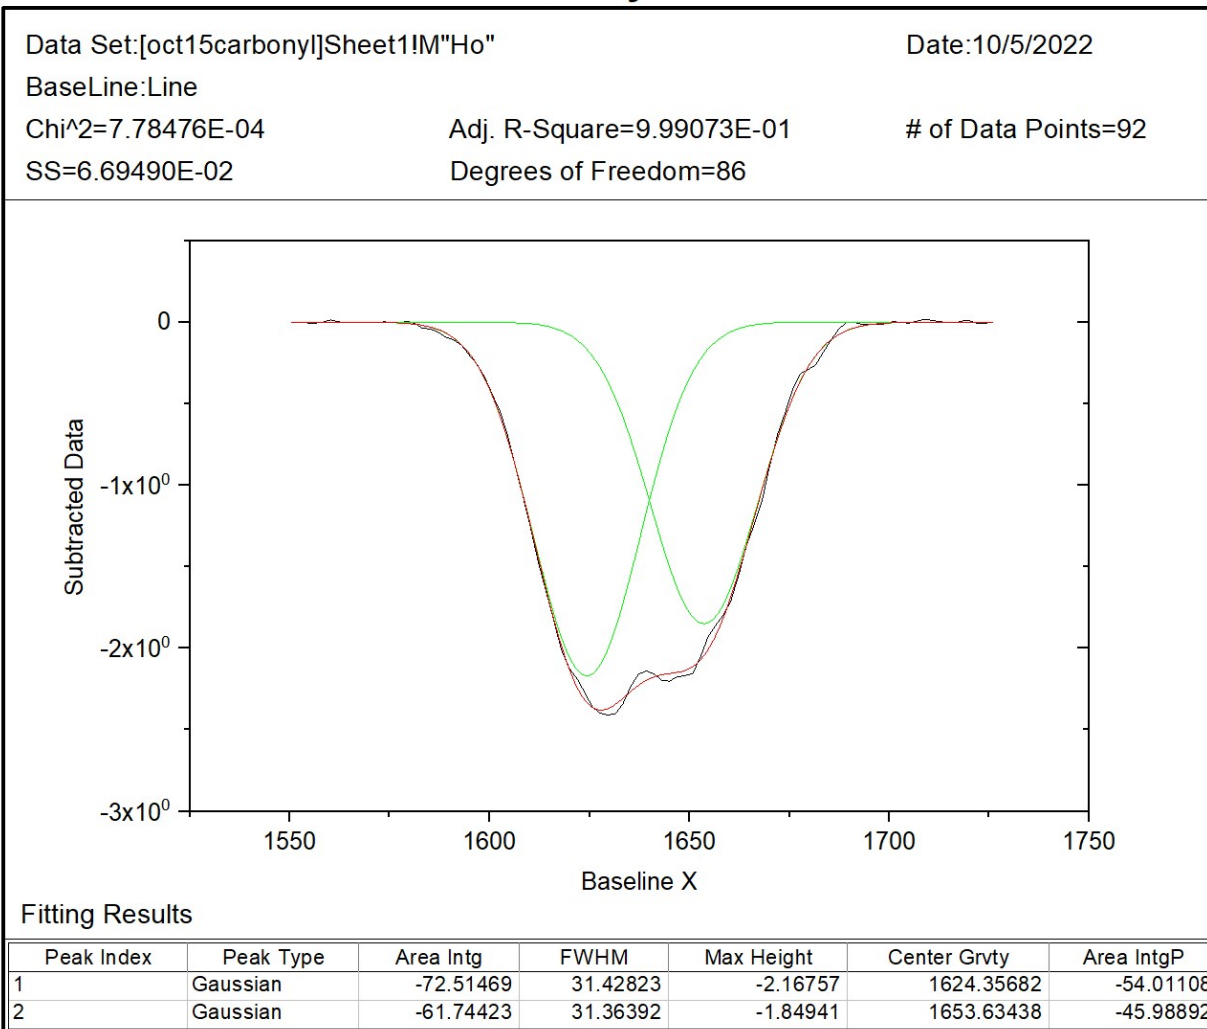

Figure S111. Peak analysis via OriginLab for 0.04 M TODGA with 15 vol% 1-octanol in n-dodecane after contact with 3 mM  $\text{Ho}(\text{NO}_3)_3$  in 1 M  $\text{HNO}_3$ .

## Peak Analysis

Data Set:[oct15carbonyl]Sheet1!N"Er"

Date:10/5/2022

BaseLine:Line

Chi^2=9.12093E-04

Adj. R-Square=9.98878E-01

# of Data Points=92

SS=7.84400E-02

Degrees of Freedom=86

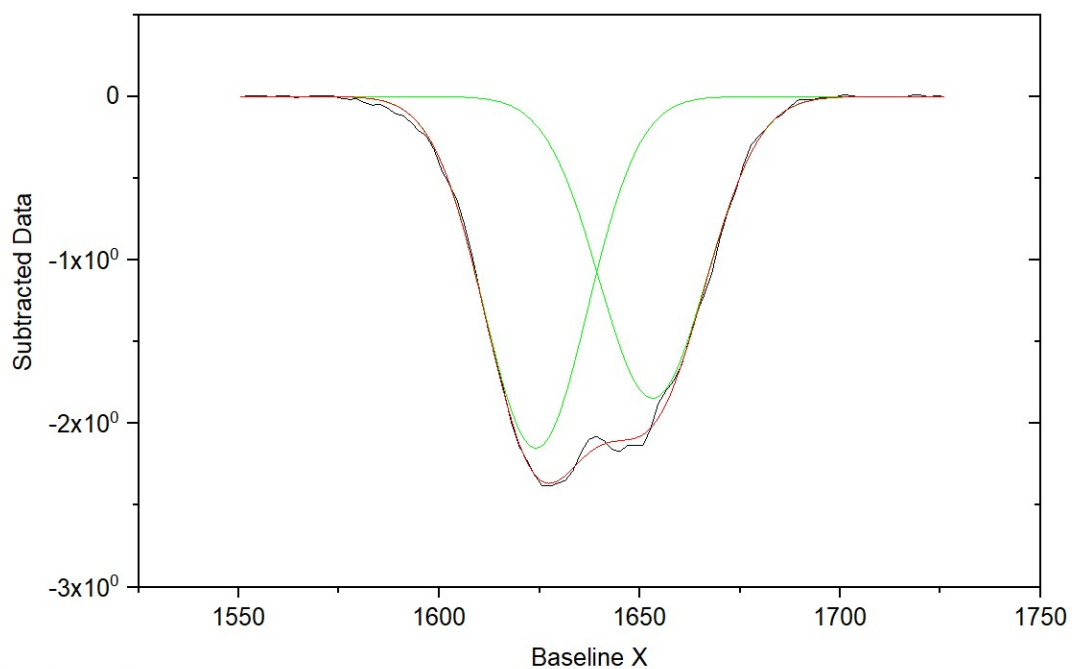

Fitting Results

| Peak Index | Peak Type | Area Intg | FWHM     | Max Height | Center Grvty | Area IntgP |
|------------|-----------|-----------|----------|------------|--------------|------------|
| 1          | Gaussian  | -69.47885 | 30.37507 | -2.14884   | 1624.10998   | -52.90636  |
| 2          | Gaussian  | -61.84534 | 31.4963  | -1.84466   | 1653.24692   | -47.09364  |

Figure S112. Peak analysis via OriginLab for 0.04 M TODGA with 15 vol% 1-octanol in n-dodecane after contact with 3 mM  $\text{Er}(\text{NO}_3)_3$  in 1 M  $\text{HNO}_3$ .

## Peak Analysis

Data Set:[oct15carbonyl]Sheet1!O"Tm"

Date:10/5/2022

BaseLine:Line

Chi<sup>2</sup>=1.01883E-03

Adj. R-Square=9.98979E-01

# of Data Points=92

SS=8.76197E-02

Degrees of Freedom=86

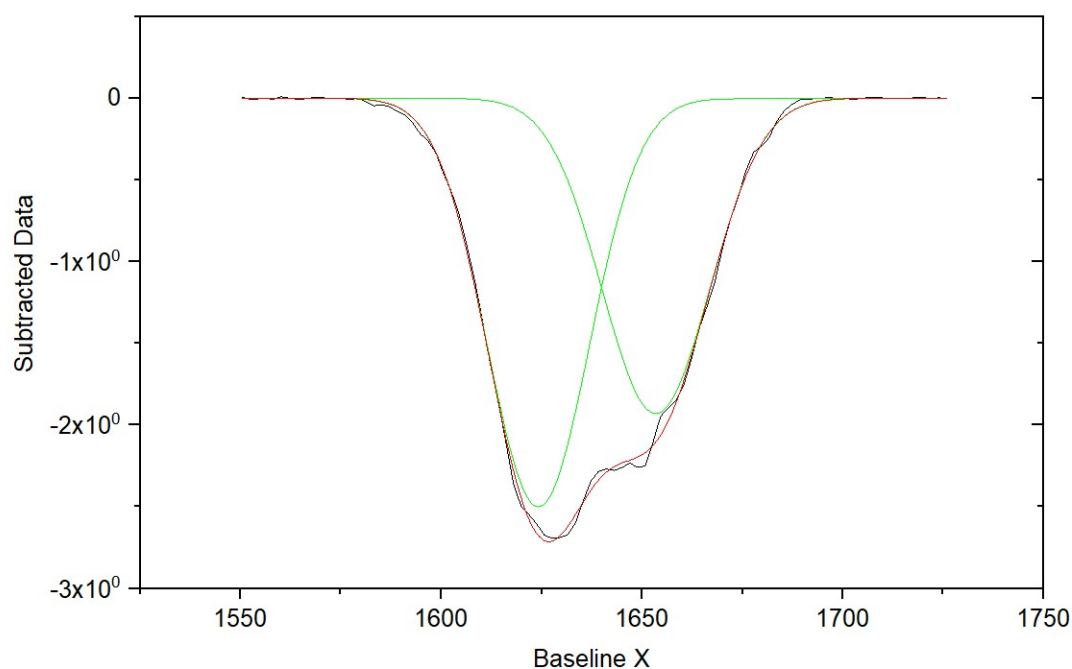

### Fitting Results

| Peak Index | Peak Type | Area Intg | FWHM     | Max Height | Center Grvty | Area IntgP |
|------------|-----------|-----------|----------|------------|--------------|------------|
| 1          | Gaussian  | -79.53674 | 29.88331 | -2.50039   | 1624.18903   | -55.11414  |
| 2          | Gaussian  | -64.77604 | 31.54704 | -1.92896   | 1653.46156   | -44.88586  |

Figure S113. Peak analysis via OriginLab for 0.04 M TODGA with 15 vol% 1-octanol in n-dodecane after contact with 3 mM Tm(NO<sub>3</sub>)<sub>3</sub> in 1 M HNO<sub>3</sub>.



## Peak Analysis

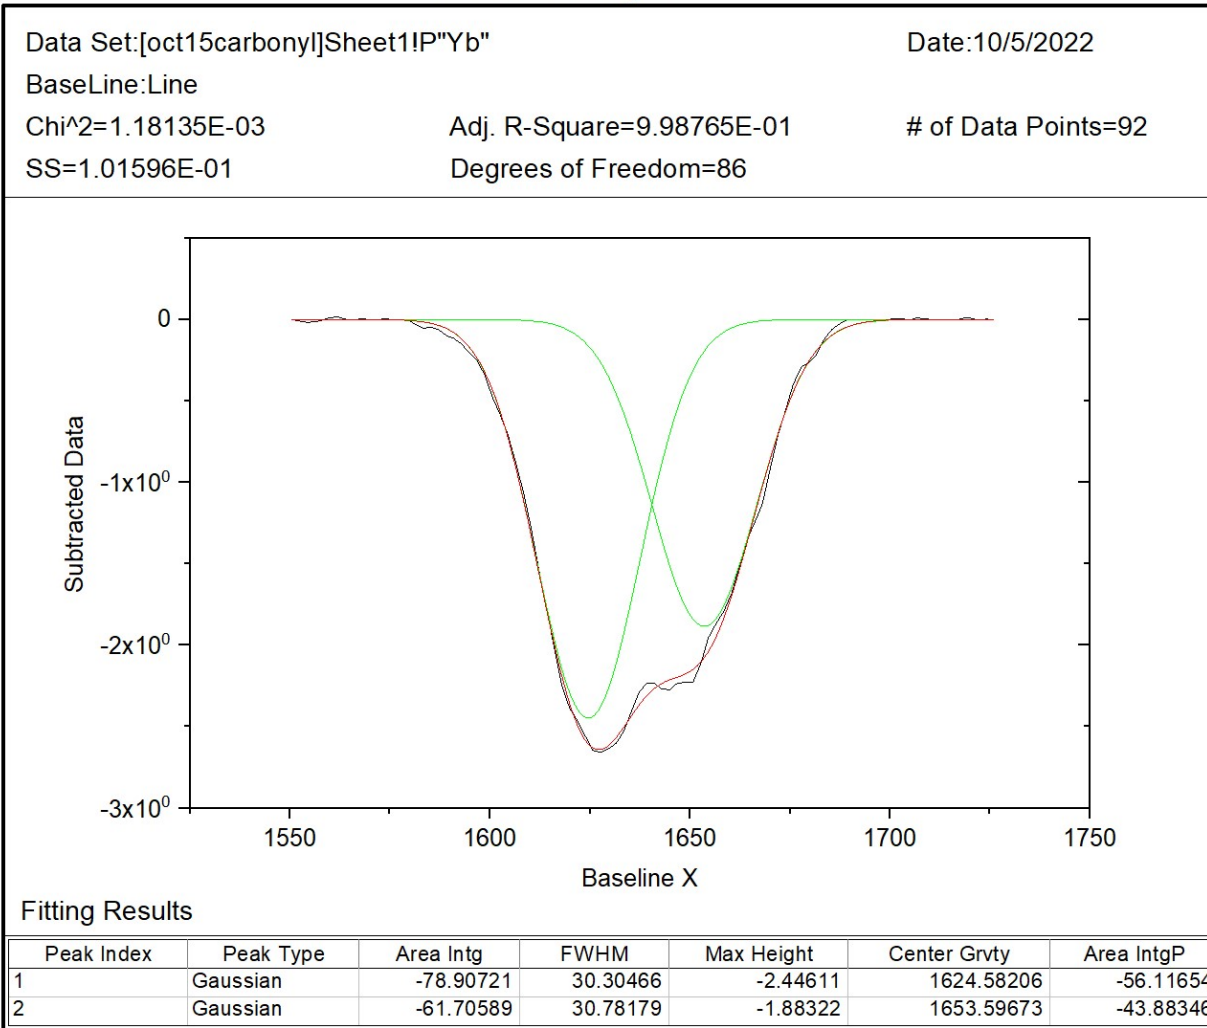

Figure S114. Peak analysis via OriginLab for 0.04 M TODGA with 15 vol% 1-octanol in n-dodecane after contact with 3 mM Yb(NO<sub>3</sub>)<sub>3</sub> in 1 M HNO<sub>3</sub>.

## Peak Analysis

Data Set:[oct15carbonyl]Sheet1!Q"Lu"

Date:10/5/2022

BaseLine:Line

Chi^2=1.34414E-03

Adj. R-Square=9.98615E-01

# of Data Points=92

SS=1.15596E-01

Degrees of Freedom=86

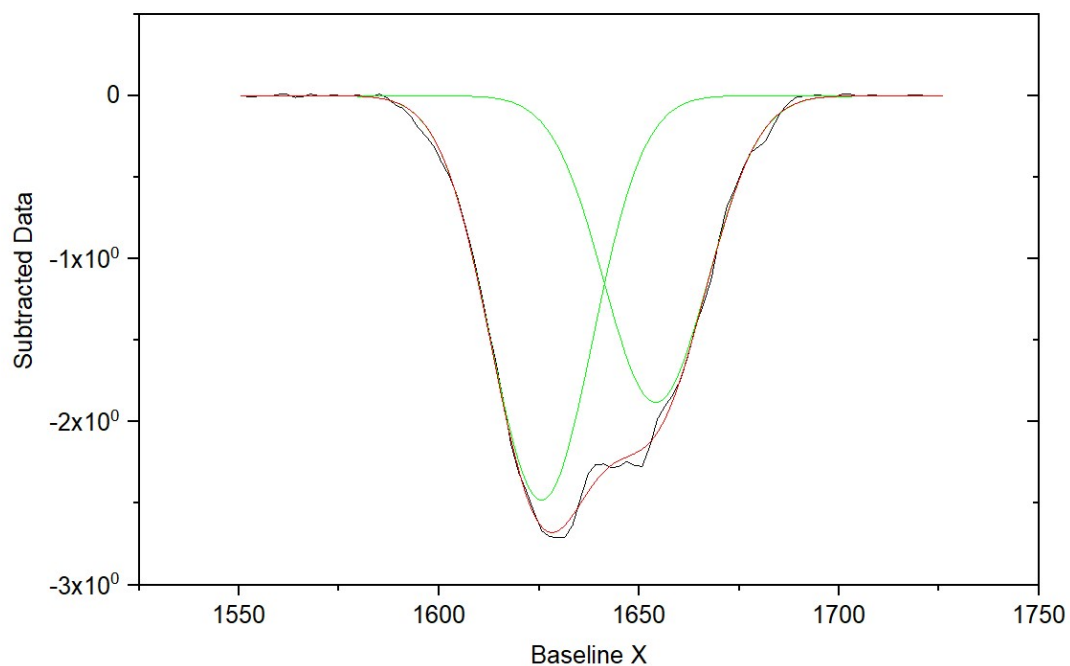

### Fitting Results

| Peak Index | Peak Type | Area Intg | FWHM     | Max Height | Center Grvty | Area IntgP |
|------------|-----------|-----------|----------|------------|--------------|------------|
| 1          | Gaussian  | -79.02729 | 29.93849 | -2.47979   | 1625.61833   | -56.45666  |
| 2          | Gaussian  | -60.95138 | 30.44753 | -1.88061   | 1654.18498   | -43.54334  |

Figure S115 Peak analysis via OriginLab for 0.04 M TODGA with 15 vol% 1-octanol in n-dodecane after contact with 3 mM Lu(NO<sub>3</sub>)<sub>3</sub> in 1 M HNO<sub>3</sub>.

30 vol% 1-octanol

## Peak Analysis

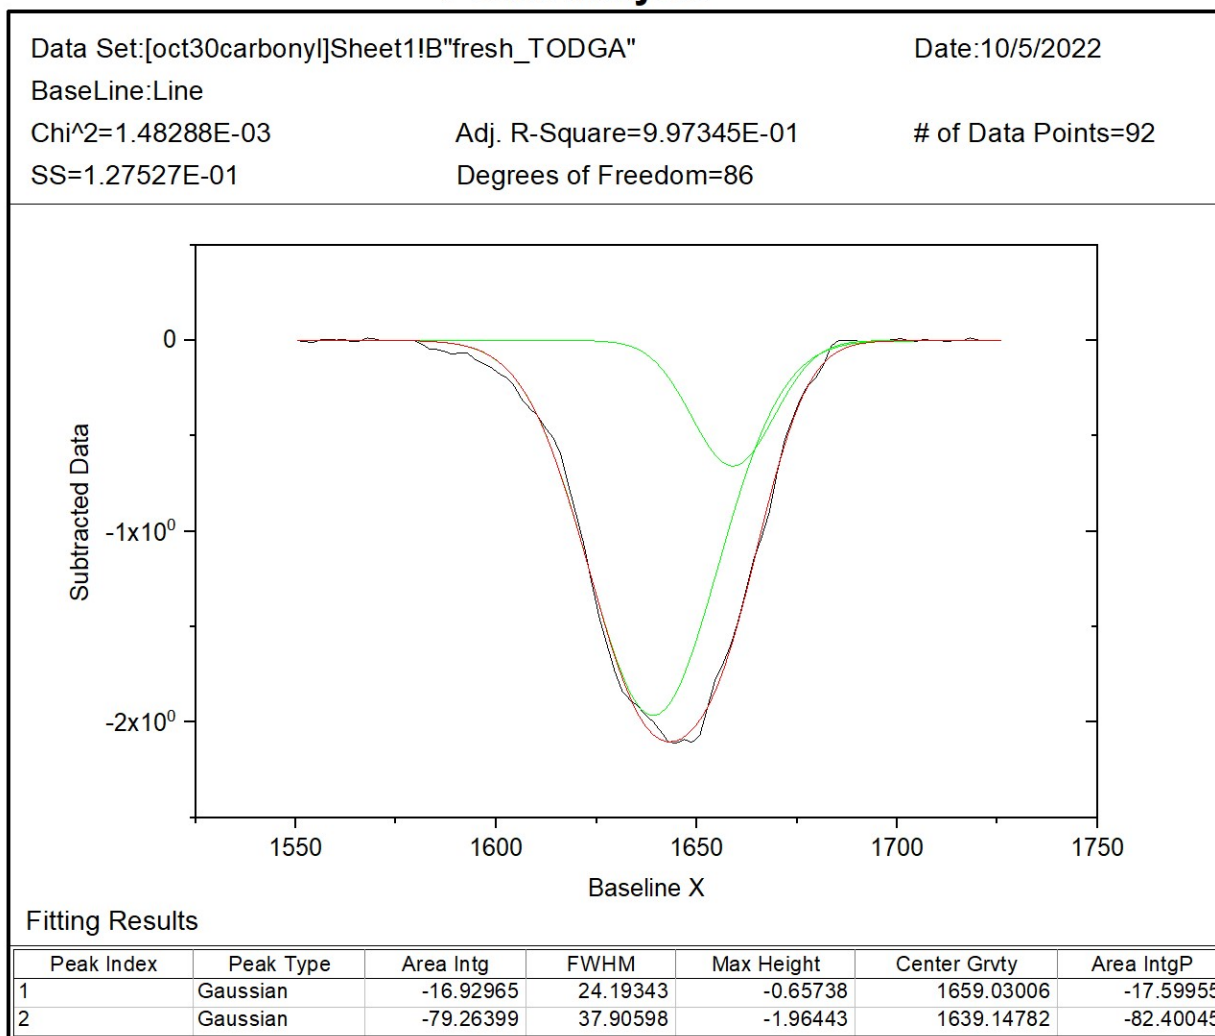

Figure S116. Peak analysis via OriginLab for 0.04 M of fresh TODGA with 30 vol% 1-octanol in n-dodecane.

## Peak Analysis

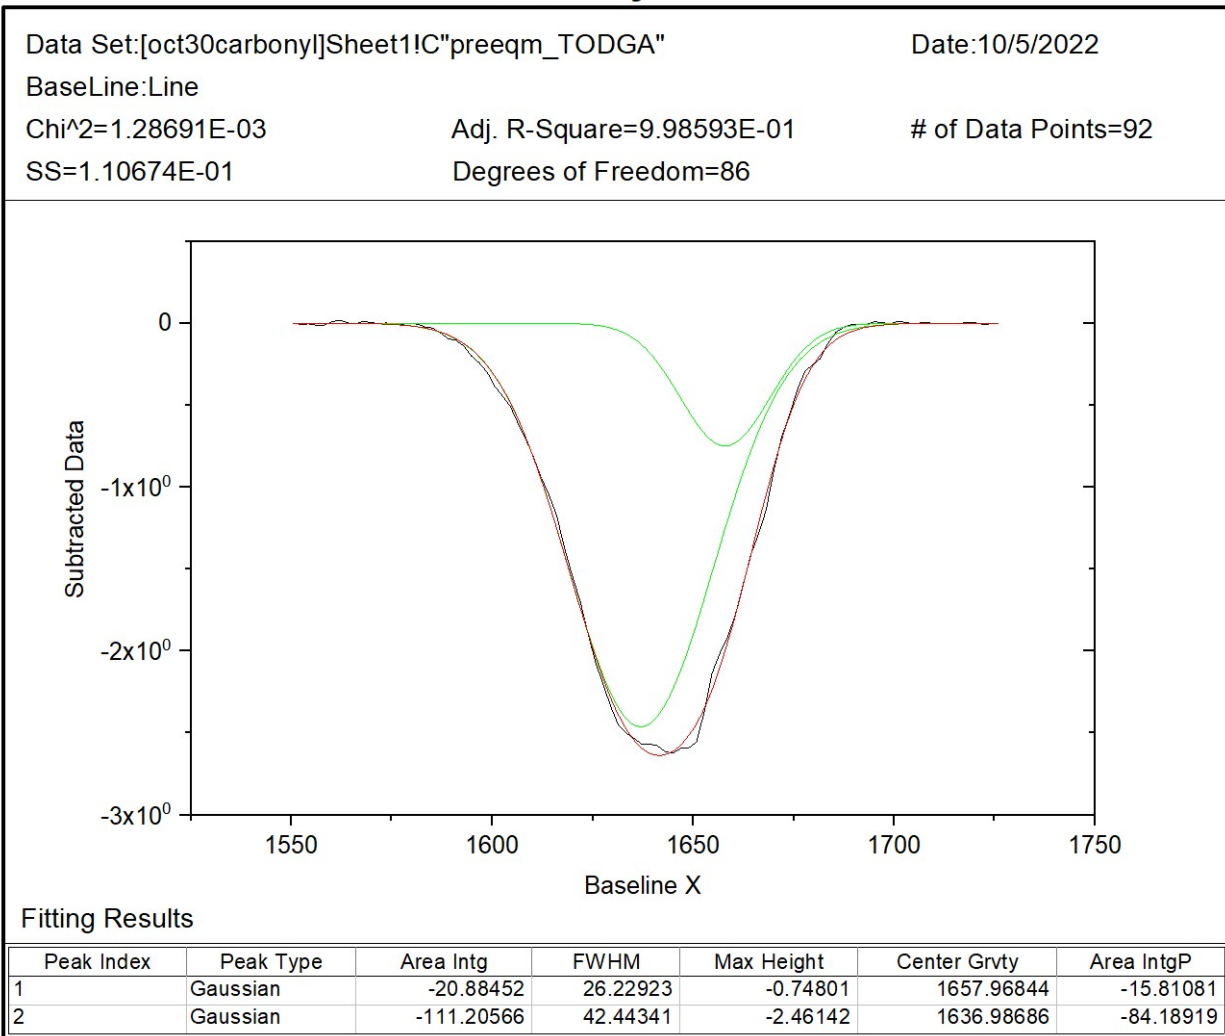

Figure S117. Peak analysis via OriginLab for 0.04 M TODGA with 30 vol% 1-octanol in n-dodecane after contact with 1 M HNO<sub>3</sub>.

## Peak Analysis

Data Set:[oct30carbonyl]Sheet1!D"La"

Date:10/5/2022

BaseLine:Line

Chi<sup>2</sup>=8.84071E-04

Adj. R-Square=9.98977E-01

# of Data Points=92

SS=7.60301E-02

Degrees of Freedom=86

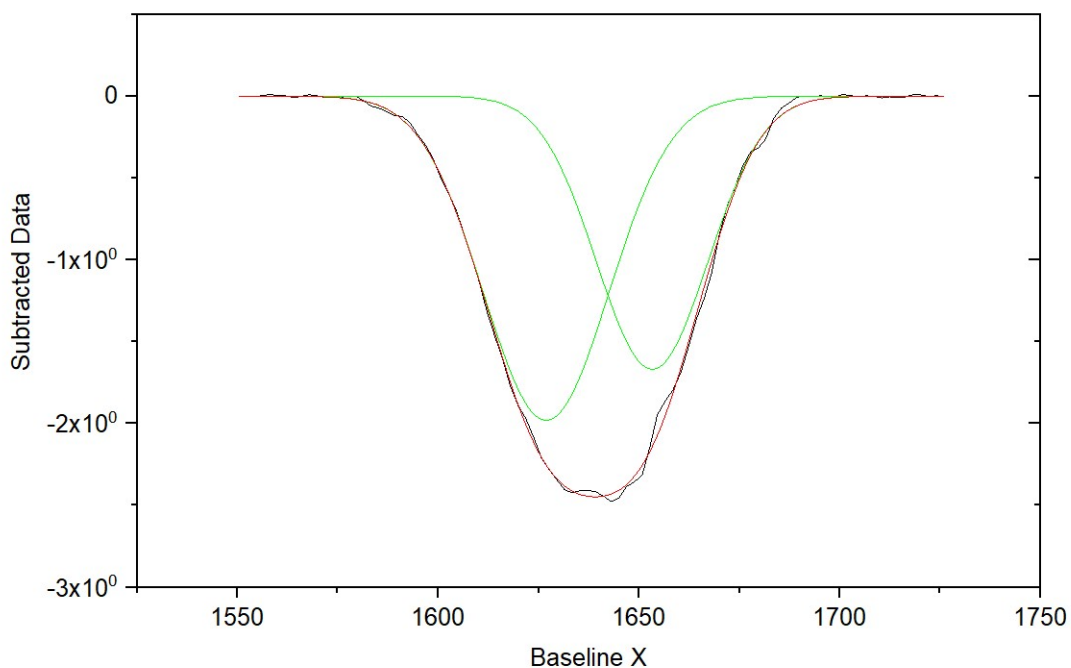

### Fitting Results

| Peak Index | Peak Type | Area Intg | FWHM     | Max Height | Center Grvty | Area IntgP |
|------------|-----------|-----------|----------|------------|--------------|------------|
| 1          | Gaussian  | -77.55856 | 36.79992 | -1.97993   | 1626.91029   | -57.19138  |
| 2          | Gaussian  | -58.05377 | 32.70802 | -1.66742   | 1653.31908   | -42.80862  |

Figure S118. Peak analysis via OriginLab for 0.04 M TODGA with 30 vol% 1-octanol in n-dodecane after contact with 3 mM La(NO<sub>3</sub>)<sub>3</sub> in 1 M HNO<sub>3</sub>.

## Peak Analysis

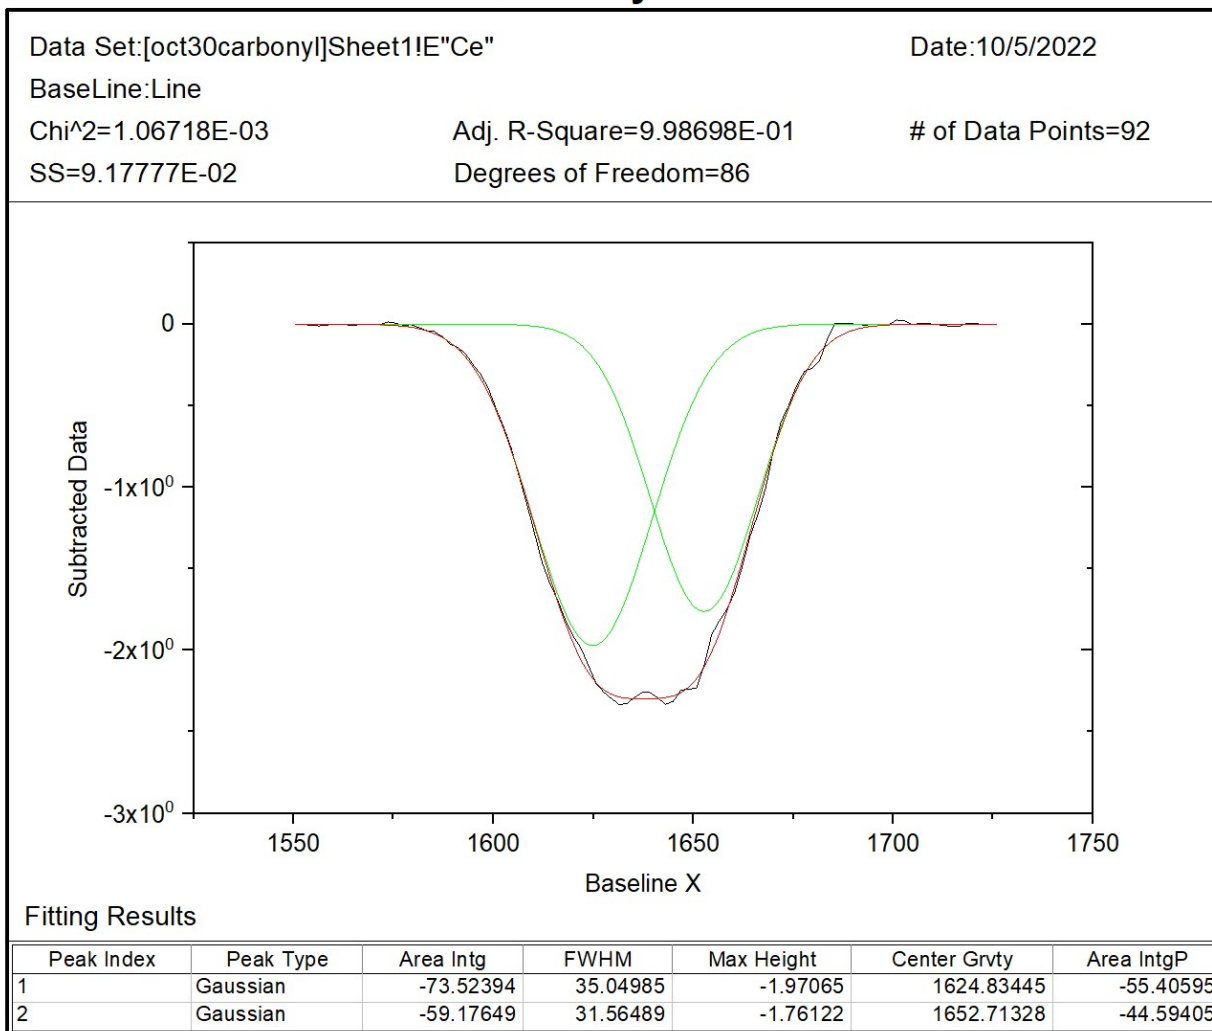

Figure S119. Peak analysis via OriginLab for 0.04 M TODGA with 30 vol% 1-octanol in n-dodecane after contact with 3 mM Ce(NO<sub>3</sub>)<sub>3</sub> in 1 M HNO<sub>3</sub>.

## Peak Analysis

Data Set:[oct30carbonyl]Sheet1!F"Pr"

Date:10/5/2022

BaseLine:Line

Chi^2=7.45435E-04

Adj. R-Square=9.98970E-01

# of Data Points=92

SS=6.41074E-02

Degrees of Freedom=86

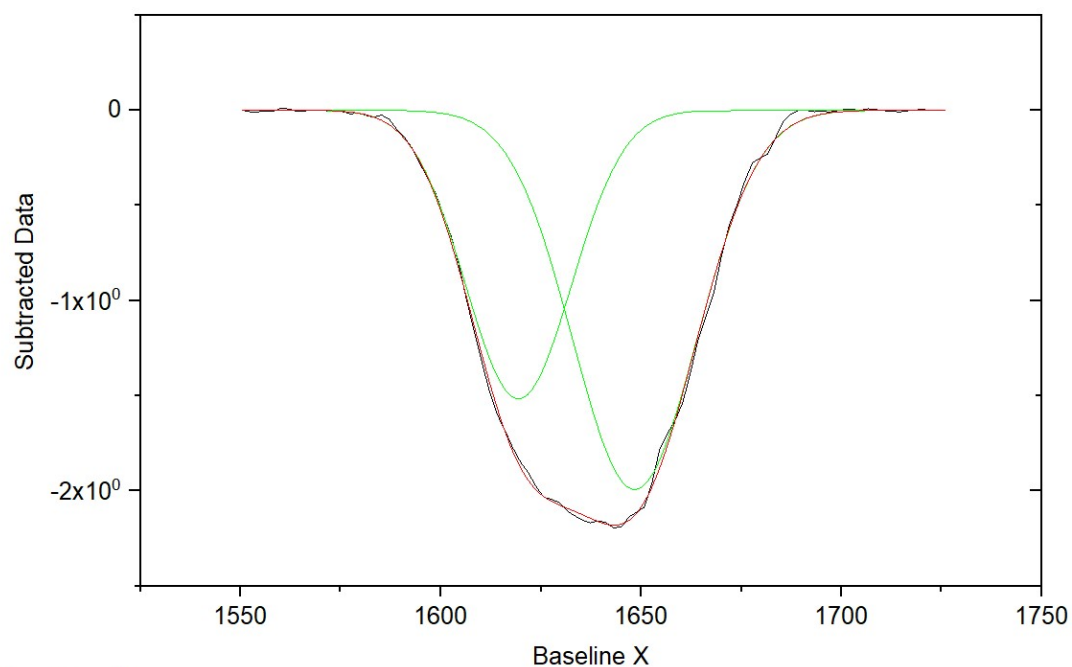

Fitting Results

| Peak Index | Peak Type | Area Intg | FWHM     | Max Height | Center Grvty | Area IntgP |
|------------|-----------|-----------|----------|------------|--------------|------------|
| 1          | Gaussian  | -50.14999 | 31.08021 | -1.51584   | 1619.40762   | -39.38149  |
| 2          | Gaussian  | -77.19408 | 36.3976  | -1.99241   | 1648.41211   | -60.61851  |

Figure S120. Peak analysis via OriginLab for 0.04 M TODGA with 30 vol% 1-octanol in n-dodecane after contact with 3 mM Pr(NO<sub>3</sub>)<sub>3</sub> in 1 M HNO<sub>3</sub>.

## Peak Analysis

Data Set:[oct30carbonyl]Sheet1!G"Nd"

Date:10/5/2022

BaseLine:Line

Chi<sup>2</sup>=1.12718E-03

Adj. R-Square=9.98514E-01

# of Data Points=92

SS=9.69375E-02

Degrees of Freedom=86

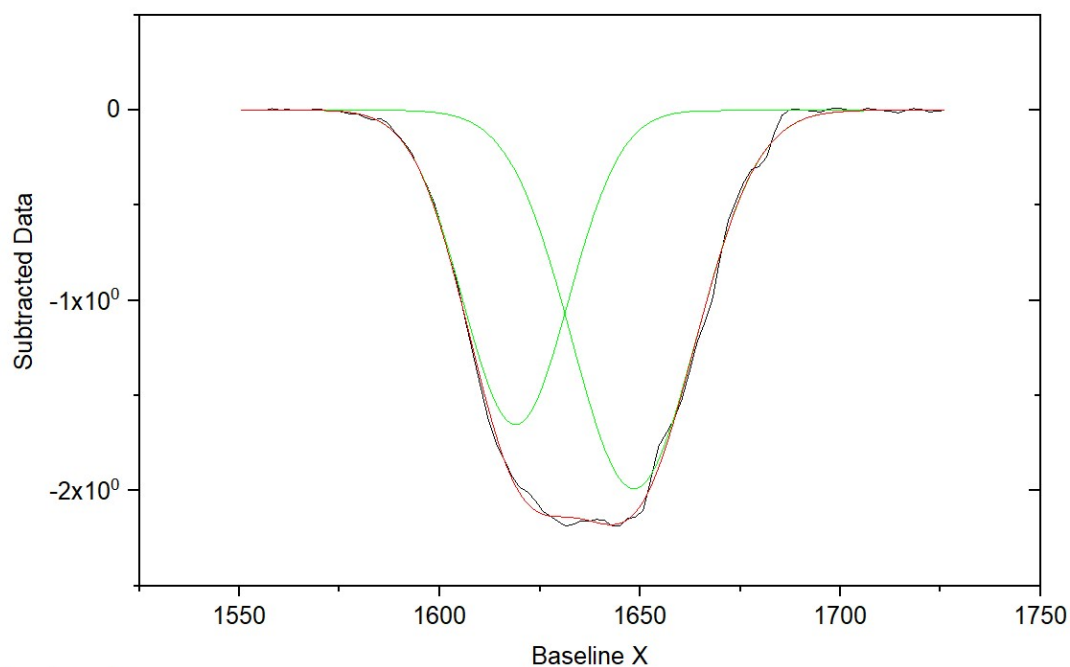

Fitting Results

| Peak Index | Peak Type | Area Intg | FWHM     | Max Height | Center Grvty | Area IntgP |
|------------|-----------|-----------|----------|------------|--------------|------------|
| 1          | Gaussian  | -54.44566 | 30.9488  | -1.65267   | 1618.95123   | -41.35924  |
| 2          | Gaussian  | -77.1952  | 36.45771 | -1.98916   | 1648.4693    | -58.64076  |

Figure S121. Peak analysis via OriginLab for 0.04 M TODGA with 30 vol% 1-octanol in n-dodecane after contact with 3 mM Nd(NO<sub>3</sub>)<sub>3</sub> in 1 M HNO<sub>3</sub>.



## Peak Analysis

Data Set:[oct30carbonyl]Sheet1!H"Sm"

Date:10/5/2022

BaseLine:Line

Chi^2=9.22849E-04

Adj. R-Square=9.98851E-01

# of Data Points=92

SS=7.93651E-02

Degrees of Freedom=86

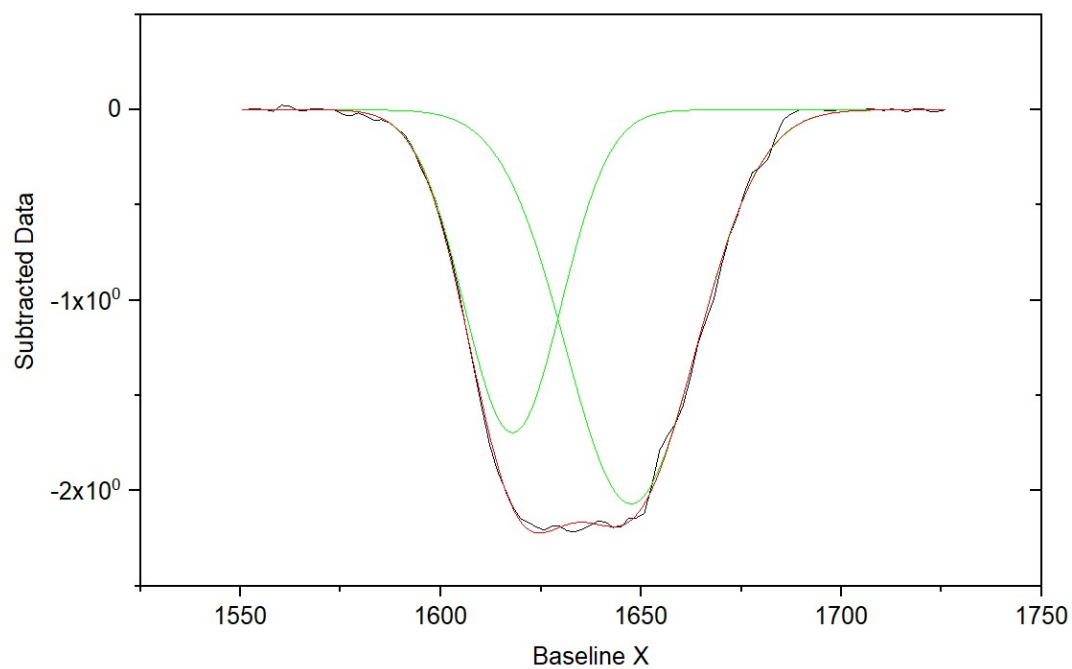

### Fitting Results

| Peak Index | Peak Type | Area Intg | FWHM     | Max Height | Center Grvty | Area IntgP |
|------------|-----------|-----------|----------|------------|--------------|------------|
| 1          | Gaussian  | -51.37673 | 28.47572 | -1.69496   | 1617.93953   | -37.88685  |
| 2          | Gaussian  | -84.22898 | 38.25338 | -2.06852   | 1647.49621   | -62.11315  |

Figure S122. Peak analysis via OriginLab for 0.04 M TODGA with 30 vol% 1-octanol in n-dodecane after contact with 3 mM Sm(NO<sub>3</sub>)<sub>3</sub> in 1 M HNO<sub>3</sub>.

## Peak Analysis

Data Set:[oct30carbonyl]Sheet1!!"Eu"

Date:10/5/2022

BaseLine:Line

Chi<sup>2</sup>=7.52769E-04

Adj. R-Square=9.99076E-01

# of Data Points=92

SS=6.47381E-02

Degrees of Freedom=86

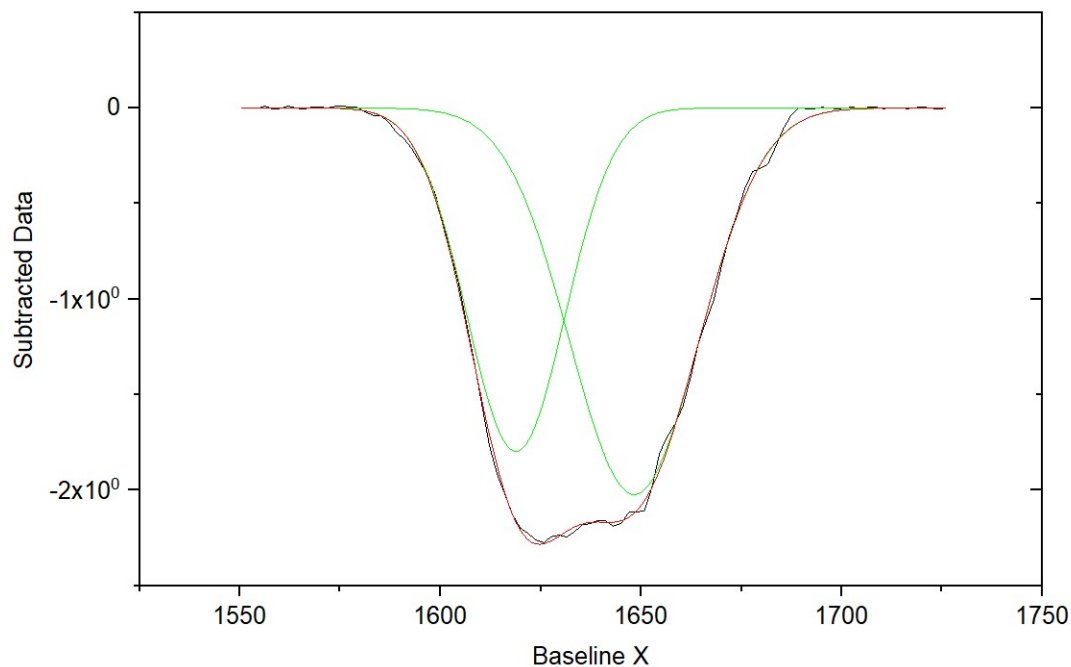

### Fitting Results

| Peak Index | Peak Type | Area Intg | FWHM     | Max Height | Center Grvty | Area IntgP |
|------------|-----------|-----------|----------|------------|--------------|------------|
| 1          | Gaussian  | -54.9441  | 28.72573 | -1.79687   | 1618.83948   | -40.35212  |
| 2          | Gaussian  | -81.21752 | 37.71516 | -2.02303   | 1648.30663   | -59.64788  |

Figure S123. Peak analysis via OriginLab for 0.04 M TODGA with 30 vol% 1-octanol in n-dodecane after contact with 3 mM Eu(NO<sub>3</sub>)<sub>3</sub> in 1 M HNO<sub>3</sub>.

## Peak Analysis

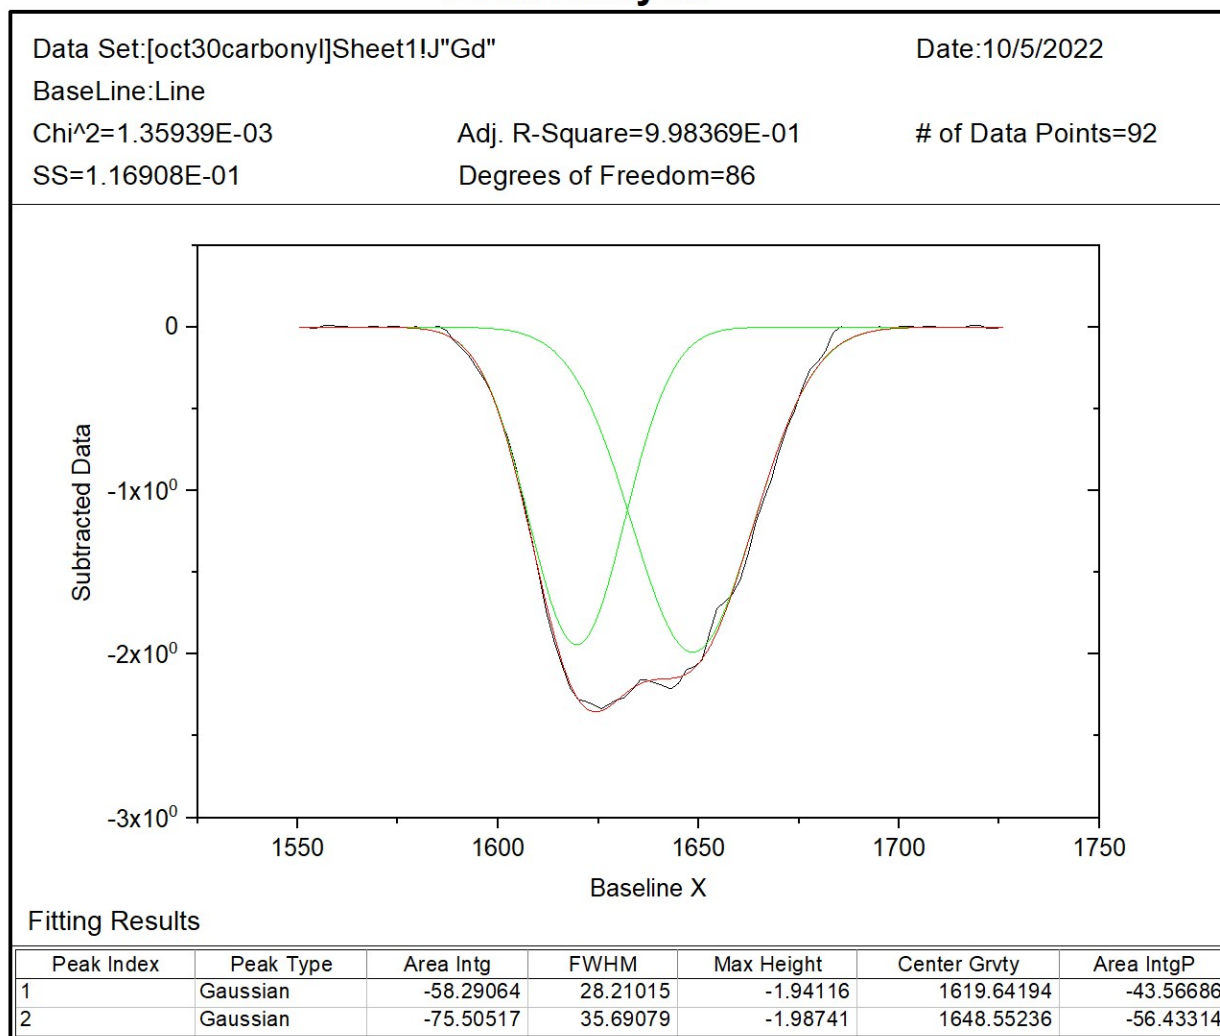

Figure S124. Peak analysis via OriginLab for 0.04 M TODGA with 30 vol% 1-octanol in n-dodecane after contact with 3 mM Gd(NO<sub>3</sub>)<sub>3</sub> in 1 M HNO<sub>3</sub>.

## Peak Analysis

Data Set:[oct30carbonyl]Sheet1!K"Tb"

Date:10/5/2022

BaseLine:Line

Chi^2=7.59379E-04

Adj. R-Square=9.99203E-01

# of Data Points=92

SS=6.53066E-02

Degrees of Freedom=86

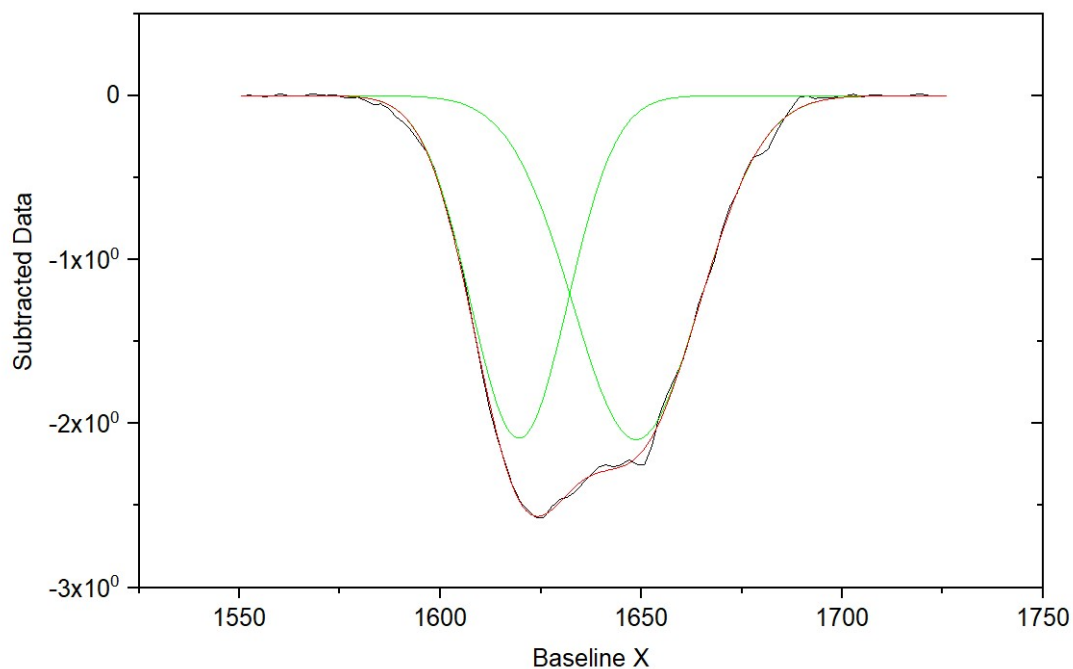

### Fitting Results

| Peak Index | Peak Type | Area Intg | FWHM     | Max Height | Center Grvty | Area IntgP |
|------------|-----------|-----------|----------|------------|--------------|------------|
| 1          | Gaussian  | -62.94327 | 28.31212 | -2.08855   | 1619.58419   | -43.17448  |
| 2          | Gaussian  | -82.84484 | 37.11068 | -2.09717   | 1648.71573   | -56.82552  |

Figure S125. Peak analysis via OriginLab for 0.04 M TODGA with 30 vol% 1-octanol in n-dodecane after contact with 3 mM  $\text{Tb}(\text{NO}_3)_3$  in 1 M  $\text{HNO}_3$ .

## Peak Analysis

Data Set:[oct30carbonyl]Sheet1!L"Dy"

Date:10/5/2022

BaseLine:Line

Chi^2=8.60282E-04

Adj. R-Square=9.98983E-01

# of Data Points=92

SS=7.39842E-02

Degrees of Freedom=86

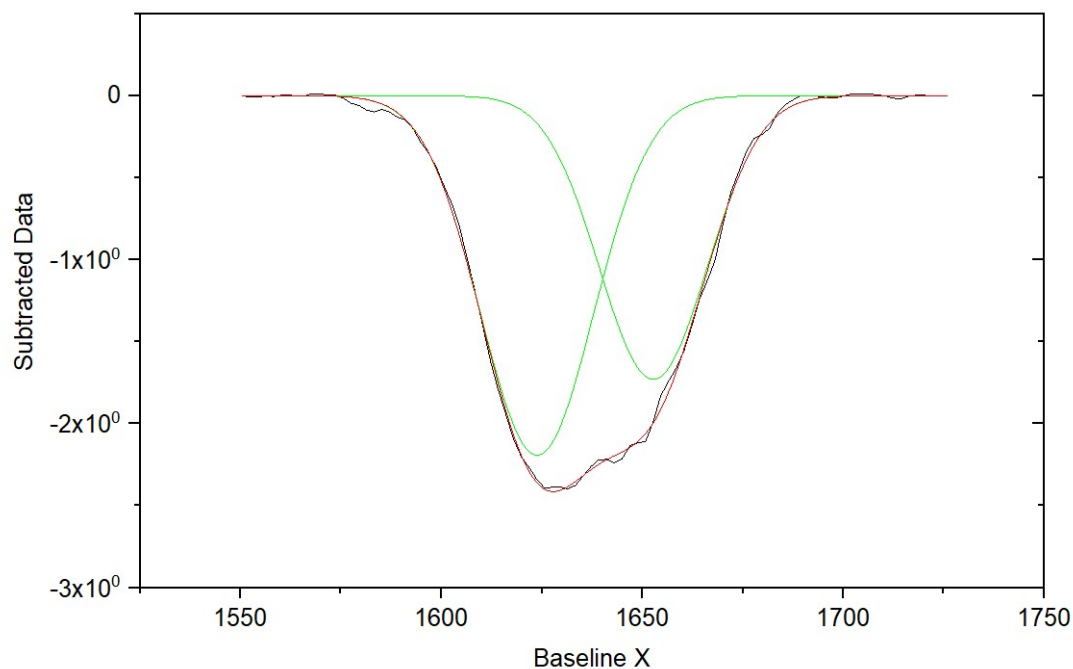

Fitting Results

| Peak Index | Peak Type | Area Intg | FWHM     | Max Height | Center Grvty | Area IntgP |
|------------|-----------|-----------|----------|------------|--------------|------------|
| 1          | Gaussian  | -77.30752 | 33.12467 | -2.19249   | 1623.83215   | -57.101    |
| 2          | Gaussian  | -58.07981 | 31.54775 | -1.72952   | 1652.7157    | -42.899    |

Figure S126. Peak analysis via OriginLab for 0.04 M TODGA with 30 vol% 1-octanol in n-dodecane after contact with 3 mM Dy(NO<sub>3</sub>)<sub>3</sub> in 1 M HNO<sub>3</sub>.

## Peak Analysis

Data Set:[oct30carbonyl]Sheet1!M"Ho"

Date:10/5/2022

BaseLine:Line

Chi<sup>2</sup>=8.75112E-04

Adj. R-Square=9.99232E-01

# of Data Points=92

SS=7.52596E-02

Degrees of Freedom=86

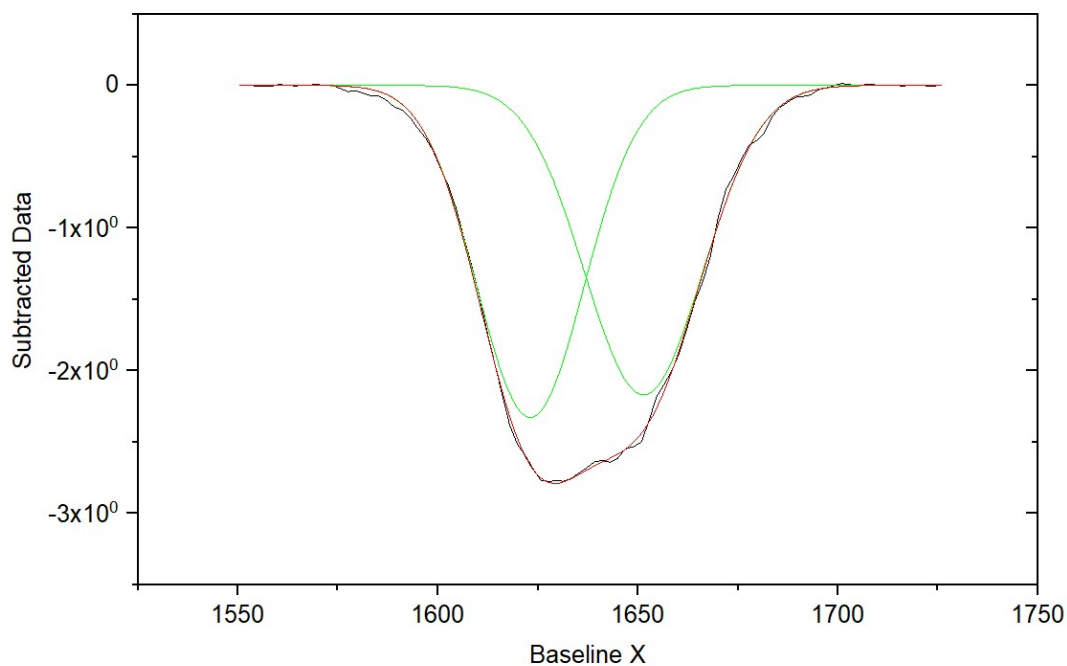

Fitting Results

| Peak Index | Peak Type | Area Intg | FWHM     | Max Height | Center Grvty | Area IntgP |
|------------|-----------|-----------|----------|------------|--------------|------------|
| 1          | Gaussian  | -78.13615 | 31.54493 | -2.32697   | 1623.12874   | -49.4454   |
| 2          | Gaussian  | -79.88898 | 34.60222 | -2.16896   | 1651.426     | -50.5546   |

Figure S127. Peak analysis via OriginLab for 0.04 M TODGA with 30 vol% 1-octanol in n-dodecane after contact with 3 mM Ho(NO<sub>3</sub>)<sub>3</sub> in 1 M HNO<sub>3</sub>.

## Peak Analysis

Data Set:[oct30carbonyl]Sheet1!N"Er"

Date:10/5/2022

BaseLine:Line

Chi^2=7.62309E-04

Adj. R-Square=9.99166E-01

# of Data Points=92

SS=6.55586E-02

Degrees of Freedom=86

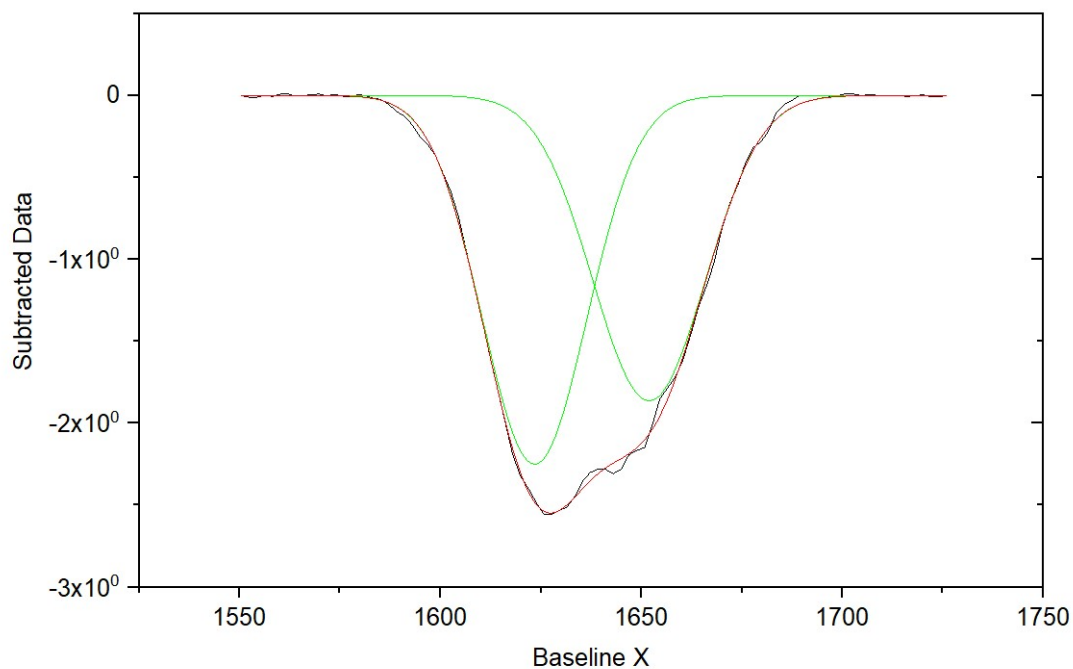

Fitting Results

| Peak Index | Peak Type | Area Intg | FWHM     | Max Height | Center Grvty | Area IntgP |
|------------|-----------|-----------|----------|------------|--------------|------------|
| 1          | Gaussian  | -73.15261 | 30.55401 | -2.24921   | 1623.46727   | -52.84417  |
| 2          | Gaussian  | -65.2782  | 32.92161 | -1.86275   | 1651.93118   | -47.15583  |

Figure S128. Peak analysis via OriginLab for 0.04 M TODGA with 30 vol% 1-octanol in n-dodecane after contact with 3 mM  $\text{Er}(\text{NO}_3)_3$  in 1 M  $\text{HNO}_3$ .

## Peak Analysis

Data Set:[oct30carbonyl]Sheet1!O"Tm"

Date:10/5/2022

BaseLine:Line

Chi^2=8.34343E-04

Adj. R-Square=9.99228E-01

# of Data Points=92

SS=7.17535E-02

Degrees of Freedom=86

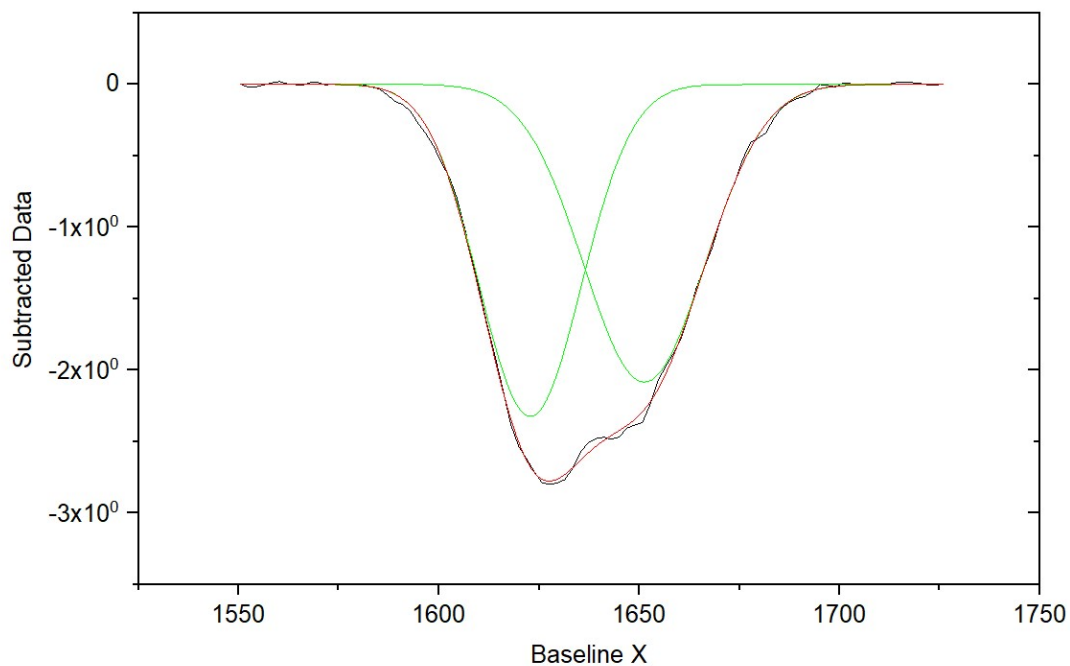

### Fitting Results

| Peak Index | Peak Type | Area Intg | FWHM     | Max Height | Center Grvty | Area IntgP |
|------------|-----------|-----------|----------|------------|--------------|------------|
| 1          | Gaussian  | -74.25442 | 30.01742 | -2.3239    | 1622.83106   | -48.46515  |
| 2          | Gaussian  | -78.95756 | 35.58972 | -2.08419   | 1651.27606   | -51.53485  |

Figure S129. Peak analysis via OriginLab for 0.04 M TODGA with 30 vol% 1-octanol in n-dodecane after contact with 3 mM Tm(NO<sub>3</sub>)<sub>3</sub> in 1 M HNO<sub>3</sub>.



## Peak Analysis

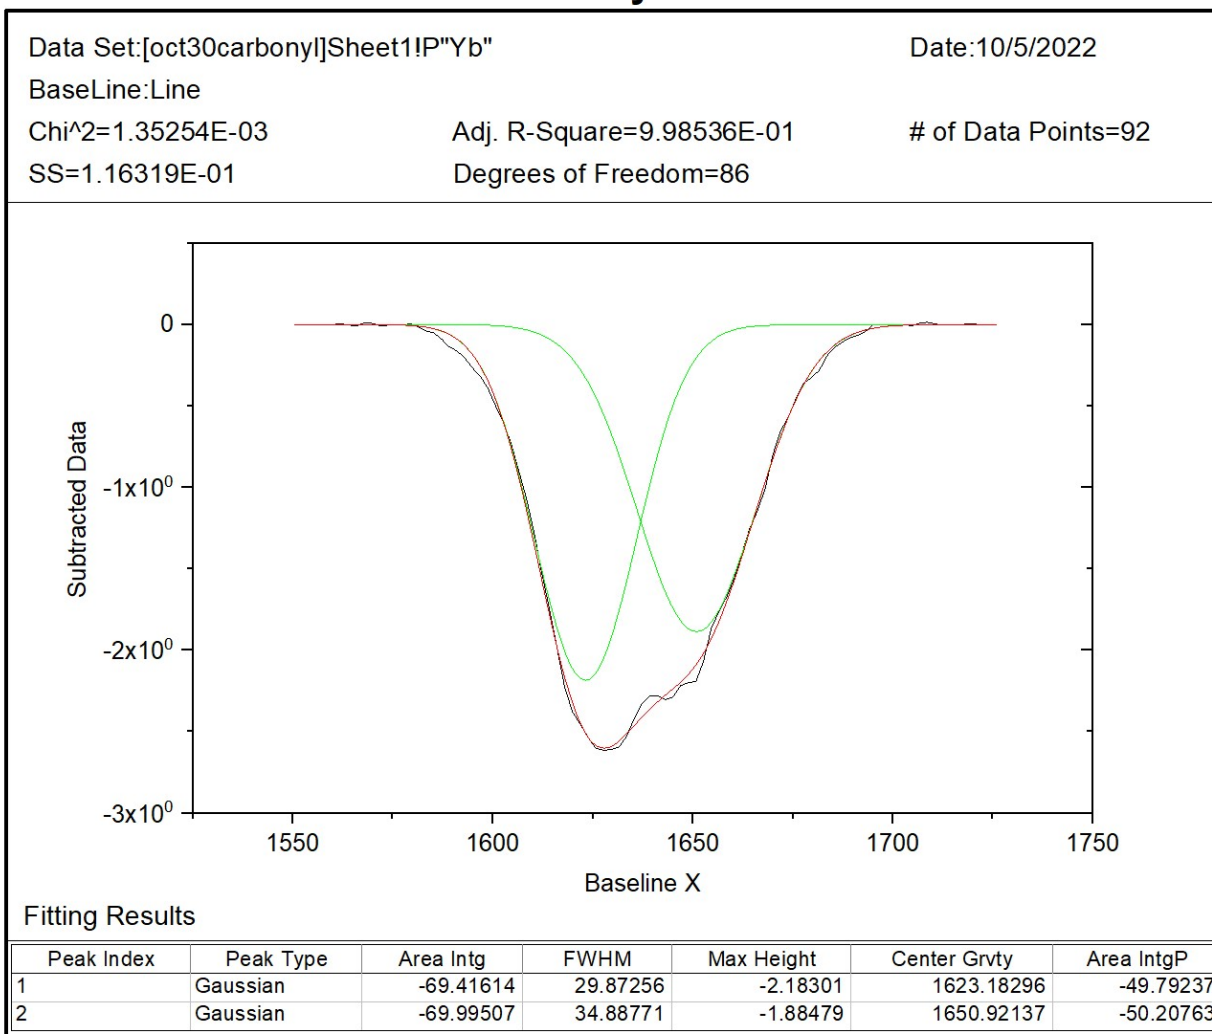

Figure S130. Peak analysis via OriginLab for 0.04 M TODGA with 30 vol% 1-octanol in n-dodecane after contact with 3 mM Yb(NO<sub>3</sub>)<sub>3</sub> in 1 M HNO<sub>3</sub>.

## Peak Analysis

Data Set:[oct30carbonyl]Sheet1!Q"Lu"

Date:10/5/2022

BaseLine:Line

Chi^2=1.30785E-03

Adj. R-Square=9.98678E-01

# of Data Points=92

SS=1.12475E-01

Degrees of Freedom=86

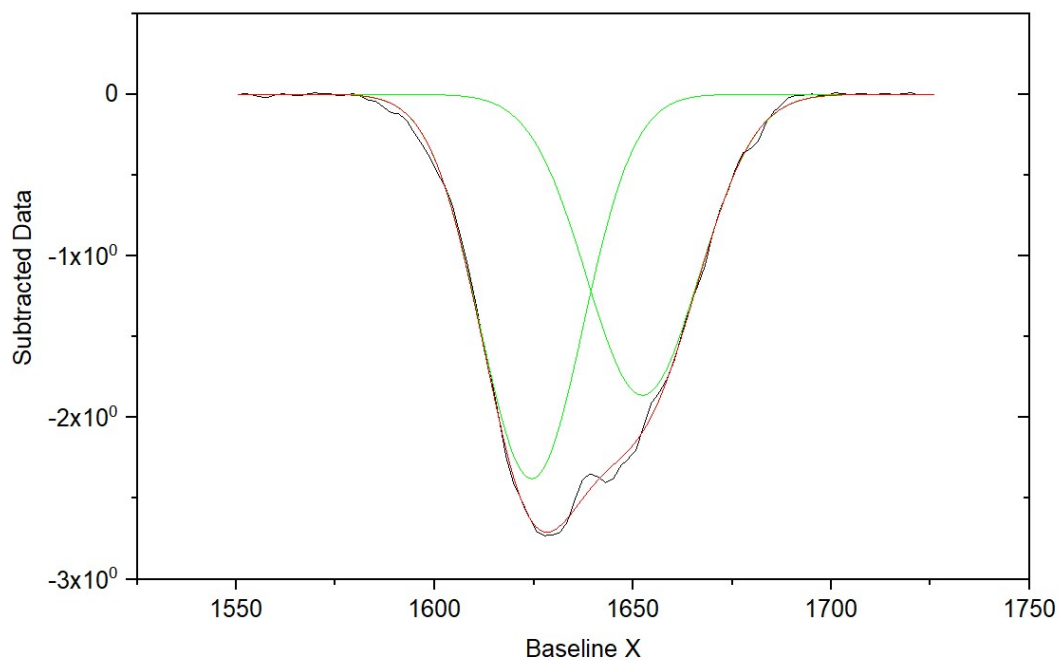

Fitting Results

| Peak Index | Peak Type | Area Intg | FWHM     | Max Height | Center Grvty | Area IntgP |
|------------|-----------|-----------|----------|------------|--------------|------------|
| 1          | Gaussian  | -77.03478 | 30.44212 | -2.37728   | 1624.46197   | -53.84574  |
| 2          | Gaussian  | -66.03091 | 33.34204 | -1.86047   | 1652.45178   | -46.15426  |

Figure S131. Peak analysis via OriginLab for 0.04 M TODGA with 30 vol% 1-octanol in n-dodecane after contact with 3 mM  $\text{Lu}(\text{NO}_3)_3$  in 1 M  $\text{HNO}_3$ .

5 vol% 1-decanol

## Peak Analysis

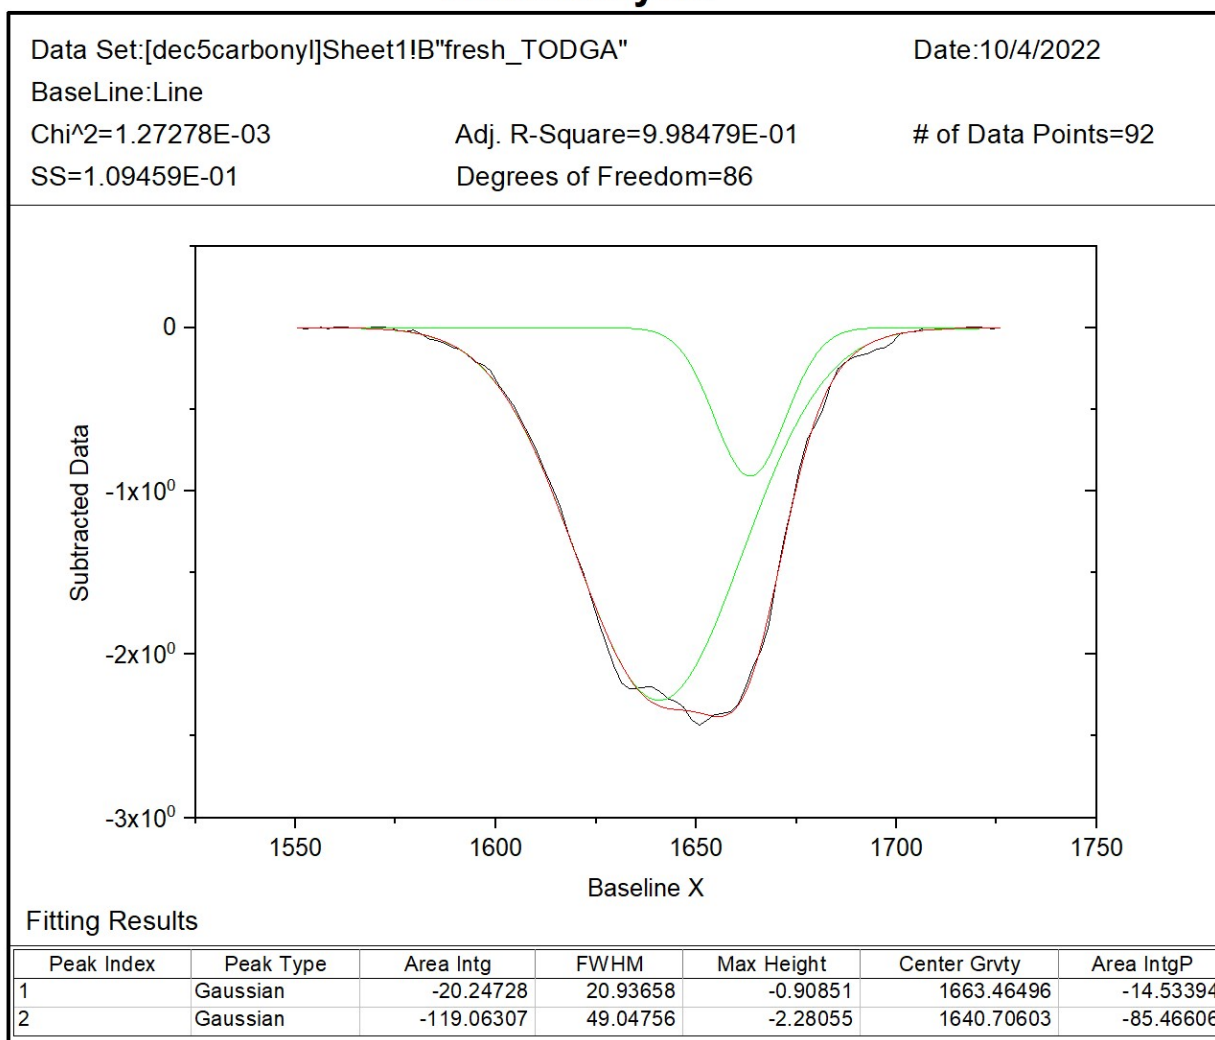

Figure S132. Peak analysis via OriginLab for 0.04 M of fresh TODGA with 5 vol% 1-decanol in n-dodecane.

## Peak Analysis

Data Set:[dec5carbonyl]Sheet1!C"preeqm\_TODGA"

Date:10/4/2022

BaseLine:Line

Chi<sup>2</sup>=1.09379E-03

Adj. R-Square=9.98377E-01

# of Data Points=92

SS=9.40655E-02

Degrees of Freedom=86

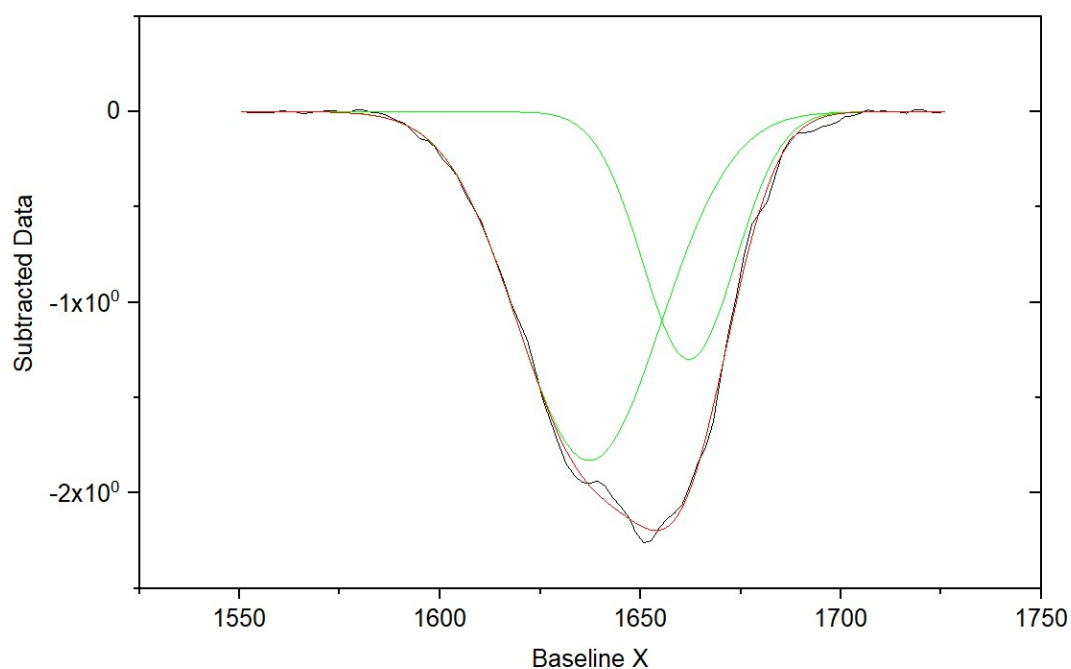

### Fitting Results

| Peak Index | Peak Type | Area Intg | FWHM     | Max Height | Center Grvty | Area IntgP |
|------------|-----------|-----------|----------|------------|--------------|------------|
| 1          | Gaussian  | -37.71906 | 27.29844 | -1.29805   | 1662.10177   | -31.47583  |
| 2          | Gaussian  | -82.11593 | 42.16743 | -1.82944   | 1637.23476   | -68.52417  |

Figure S133. Peak analysis via OriginLab for 0.04 M TODGA with 5 vol% 1-decanol in n-dodecane after contact with 1 M HNO<sub>3</sub>.

## Peak Analysis

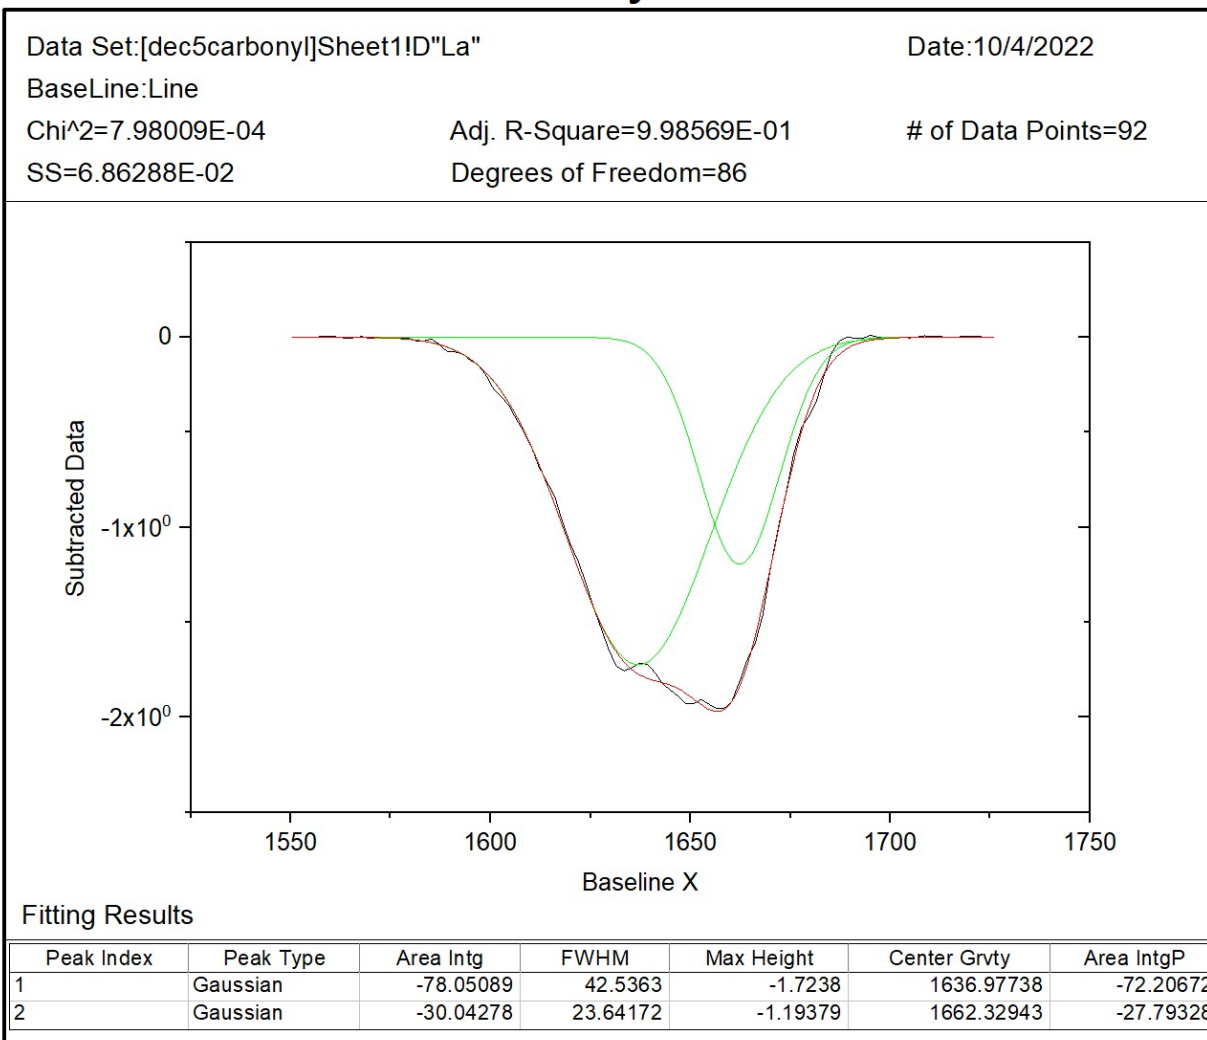

Figure S134. Peak analysis via OriginLab for 0.04 M TODGA with 5 vol% 1-decanol in n-dodecane after contact with 3 mM La(NO<sub>3</sub>)<sub>3</sub> in 1 M HNO<sub>3</sub>.

## Peak Analysis

Data Set:[dec5carbonyl]Sheet1!E"Ce"

Date:10/4/2022

BaseLine:Line

Chi^2=7.08972E-04

Adj. R-Square=9.98657E-01

# of Data Points=92

SS=5.88446E-02

Degrees of Freedom=83

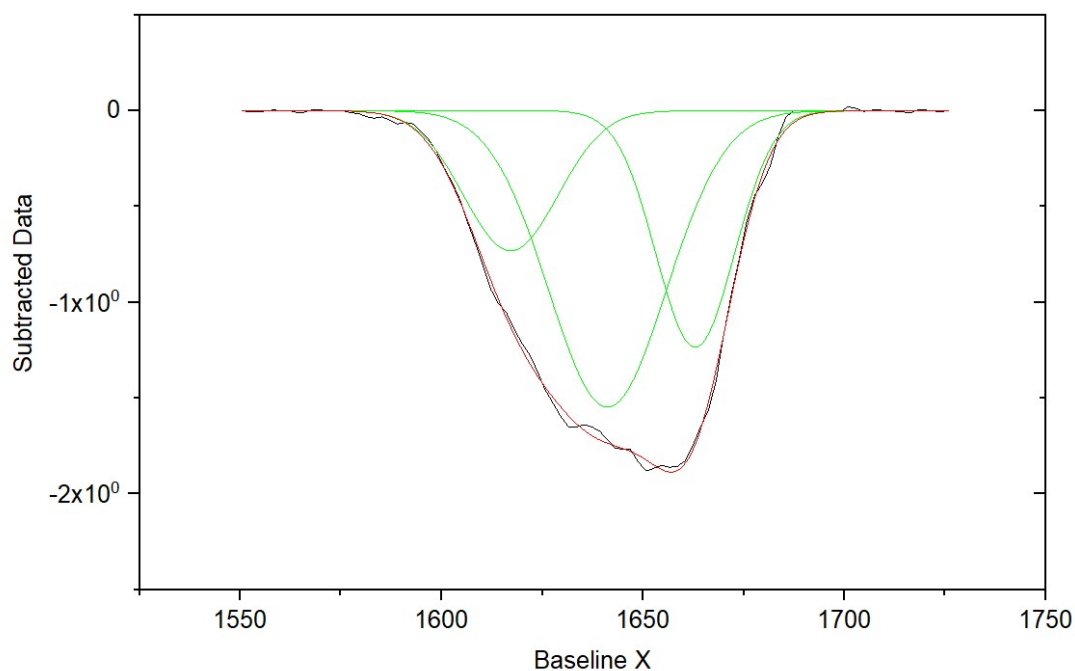

### Fitting Results

| Peak Index | Peak Type | Area Intg | FWHM     | Max Height | Center Grvty | Area IntgP |
|------------|-----------|-----------|----------|------------|--------------|------------|
| 1          | Gaussian  | -56.62989 | 34.39306 | -1.54683   | 1641.19315   | -52.35982  |
| 2          | Gaussian  | -30.1031  | 22.91606 | -1.23407   | 1662.96133   | -27.83323  |
| 3          | Gaussian  | -21.42226 | 27.52532 | -0.73114   | 1617.16095   | -19.80695  |

Figure S135. Peak analysis via OriginLab for 0.04 M TODGA with 5 vol% 1-decanol in n-dodecane after contact with 3 mM  $\text{Ce}(\text{NO}_3)_3$  in 1 M  $\text{HNO}_3$ .

## Peak Analysis

Data Set:[dec5carbonyl]Sheet1!F"Pr"

Date:10/4/2022

BaseLine:Line

Chi<sup>2</sup>=4.47805E-04

Adj. R-Square=9.99064E-01

# of Data Points=92

SS=3.71678E-02

Degrees of Freedom=83

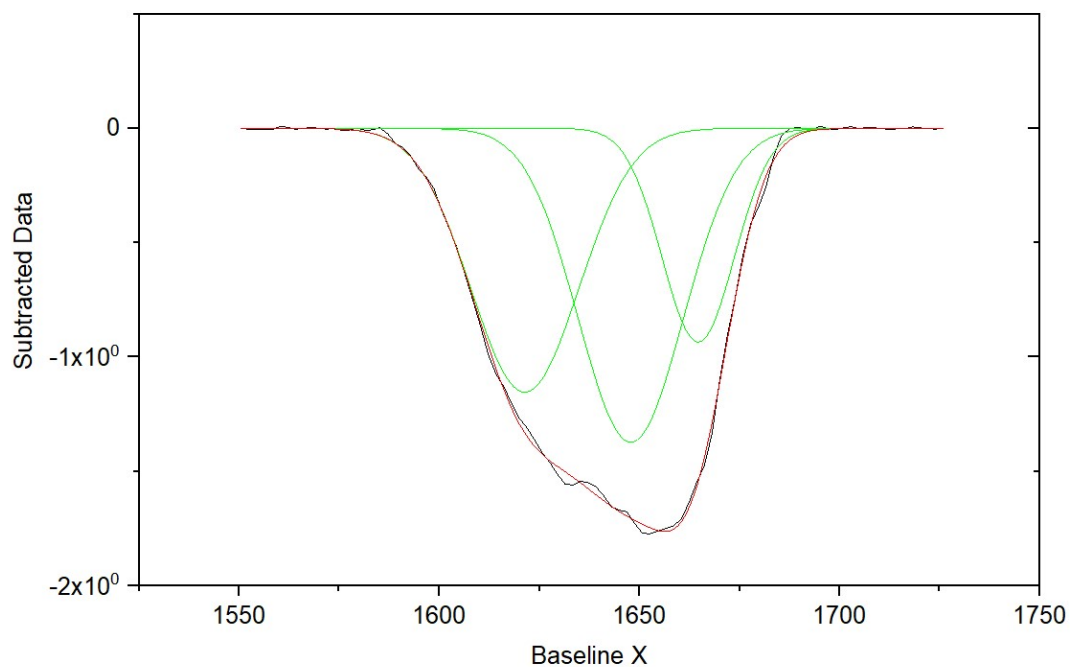

### Fitting Results

| Peak Index | Peak Type | Area Intg | FWHM     | Max Height | Center Grvty | Area IntgP |
|------------|-----------|-----------|----------|------------|--------------|------------|
| 1          | Gaussian  | -45.14753 | 30.88597 | -1.37322   | 1647.87221   | -42.86597  |
| 2          | Gaussian  | -21.09979 | 21.21673 | -0.93426   | 1664.67956   | -20.03349  |
| 3          | Gaussian  | -39.07524 | 31.80157 | -1.15431   | 1621.38121   | -37.10054  |

Figure S136. Peak analysis via OriginLab for 0.04 M TODGA with 5 vol% 1-decanol in n-dodecane after contact with 3 mM Pr(NO<sub>3</sub>)<sub>3</sub> in 1 M HNO<sub>3</sub>.

## Peak Analysis

Data Set:[dec5carbonyl]Sheet1!G"Nd"

Date:10/4/2022

BaseLine:Line

Chi^2=5.56368E-04

Adj. R-Square=9.98961E-01

# of Data Points=92

SS=4.61786E-02

Degrees of Freedom=83

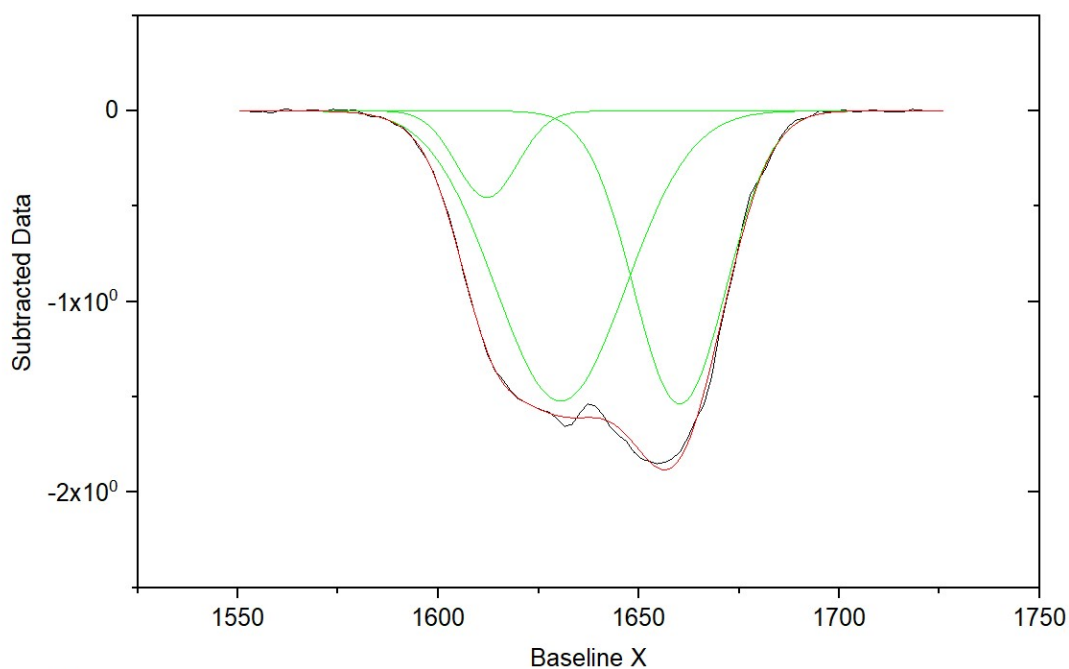

Fitting Results

| Peak Index | Peak Type | Area Intg | FWHM     | Max Height | Center Grvty | Area IntgP |
|------------|-----------|-----------|----------|------------|--------------|------------|
| 1          | Gaussian  | -62.08659 | 38.33482 | -1.5215    | 1630.51142   | -53.91043  |
| 2          | Gaussian  | -44.33011 | 27.11835 | -1.53569   | 1660.25299   | -38.49229  |
| 3          | Gaussian  | -8.74949  | 18.08996 | -0.45437   | 1612.12268   | -7.59728   |

Figure S137. Peak analysis via OriginLab for 0.04 M TODGA with 5 vol% 1-decanol in n-dodecane after contact with 3 mM Nd(NO<sub>3</sub>)<sub>3</sub> in 1 M HNO<sub>3</sub>.



## Peak Analysis

Data Set:[dec5carbonyl]Sheet1!H"Sm"

Date:10/4/2022

BaseLine:Line

Chi<sup>2</sup>=2.87034E-03

Adj. R-Square=9.93560E-01

# of Data Points=92

SS=2.46849E-01

Degrees of Freedom=86

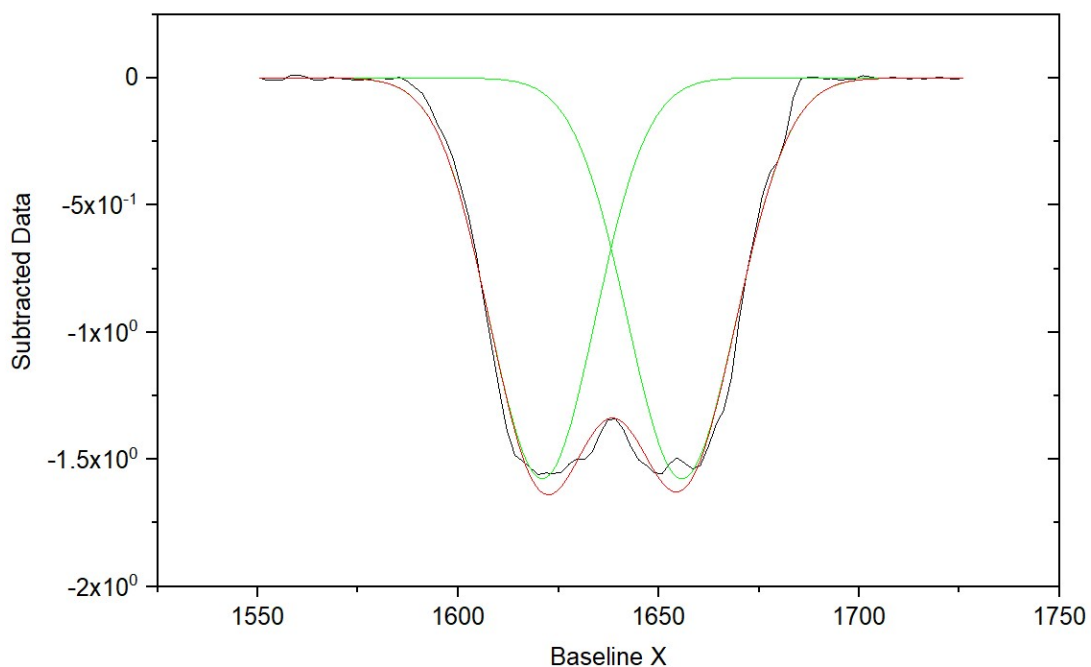

Fitting Results

| Peak Index | Peak Type | Area Intg | FWHM     | Max Height | Center Grvty | Area IntgP |
|------------|-----------|-----------|----------|------------|--------------|------------|
| 1          | Gaussian  | -51.83408 | 30.9034  | -1.57571   | 1620.95531   | -49.32824  |
| 2          | Gaussian  | -53.24584 | 31.74324 | -1.5758    | 1655.78746   | -50.67176  |

Figure S138. Peak analysis via OriginLab for 0.04 M TODGA with 5 vol% 1-decanol in n-dodecane after contact with 3 mM Sm(NO<sub>3</sub>)<sub>3</sub> in 1 M HNO<sub>3</sub>.

## Peak Analysis

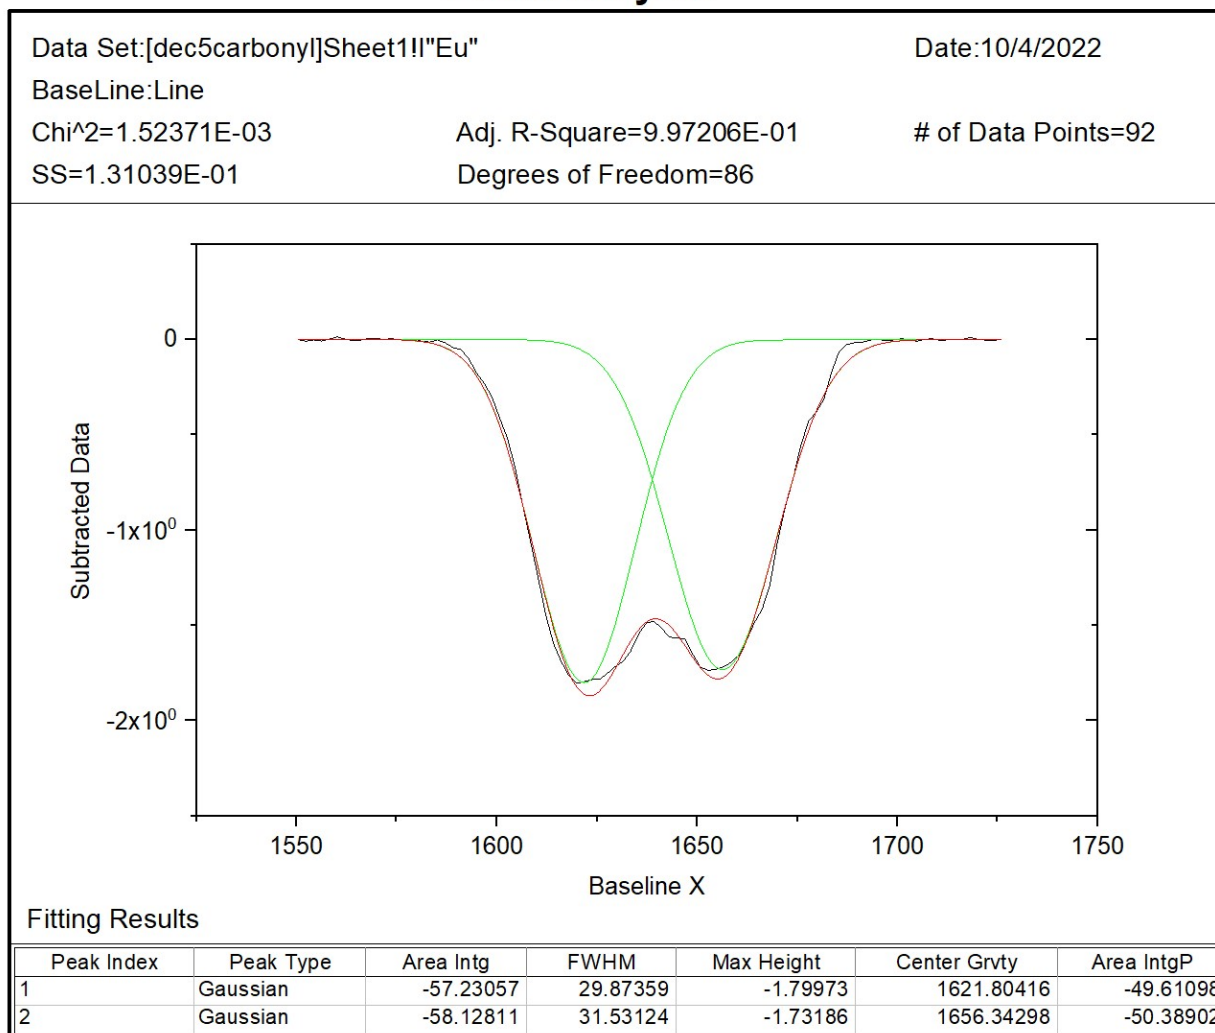

Figure S139. Peak analysis via OriginLab for 0.04 M TODGA with 5 vol% 1-decanol in n-dodecane after contact with 3 mM  $\text{Eu}(\text{NO}_3)_3$  in 1 M  $\text{HNO}_3$ .

## Peak Analysis

Data Set:[dec5carbonyl]Sheet1!J"Gd"

Date:10/4/2022

BaseLine:Line

Chi^2=1.72464E-03

Adj. R-Square=9.96969E-01

# of Data Points=92

SS=1.48319E-01

Degrees of Freedom=86

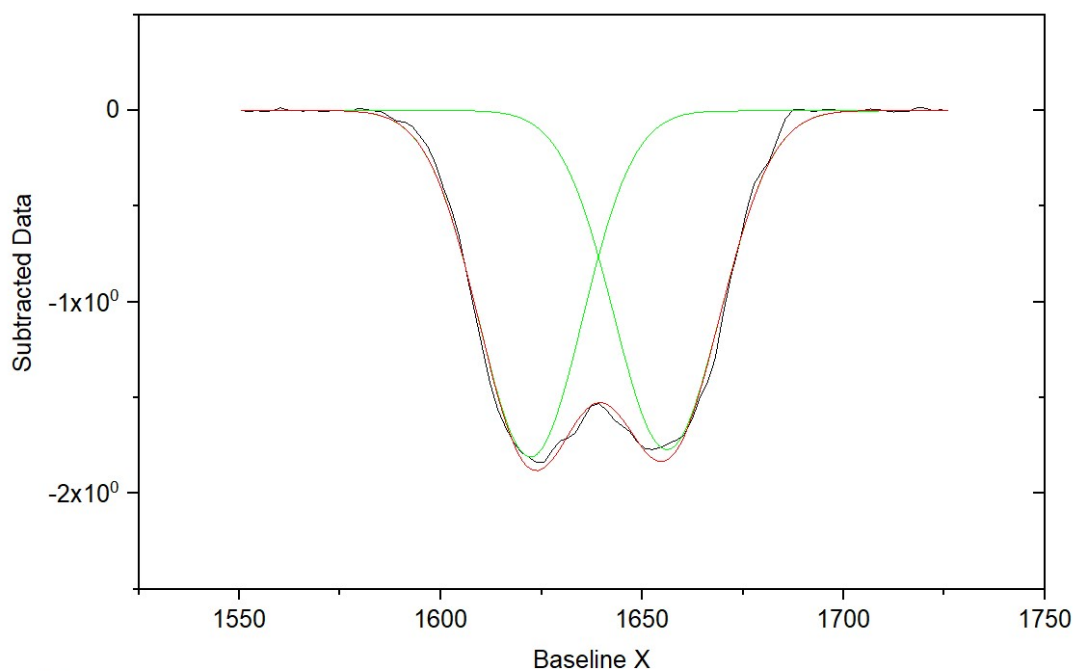

Fitting Results

| Peak Index | Peak Type | Area Intg | FWHM     | Max Height | Center Grvty | Area IntgP |
|------------|-----------|-----------|----------|------------|--------------|------------|
| 1          | Gaussian  | -58.13873 | 30.18599 | -1.80937   | 1622.2669    | -49.9637   |
| 2          | Gaussian  | -58.2232  | 30.88723 | -1.77086   | 1656.13752   | -50.0363   |

Figure S140. Peak analysis via OriginLab for 0.04 M TODGA with 5 vol% 1-decanol in n-dodecane after contact with 3 mM Gd(NO<sub>3</sub>)<sub>3</sub> in 1 M HNO<sub>3</sub>.

## Peak Analysis

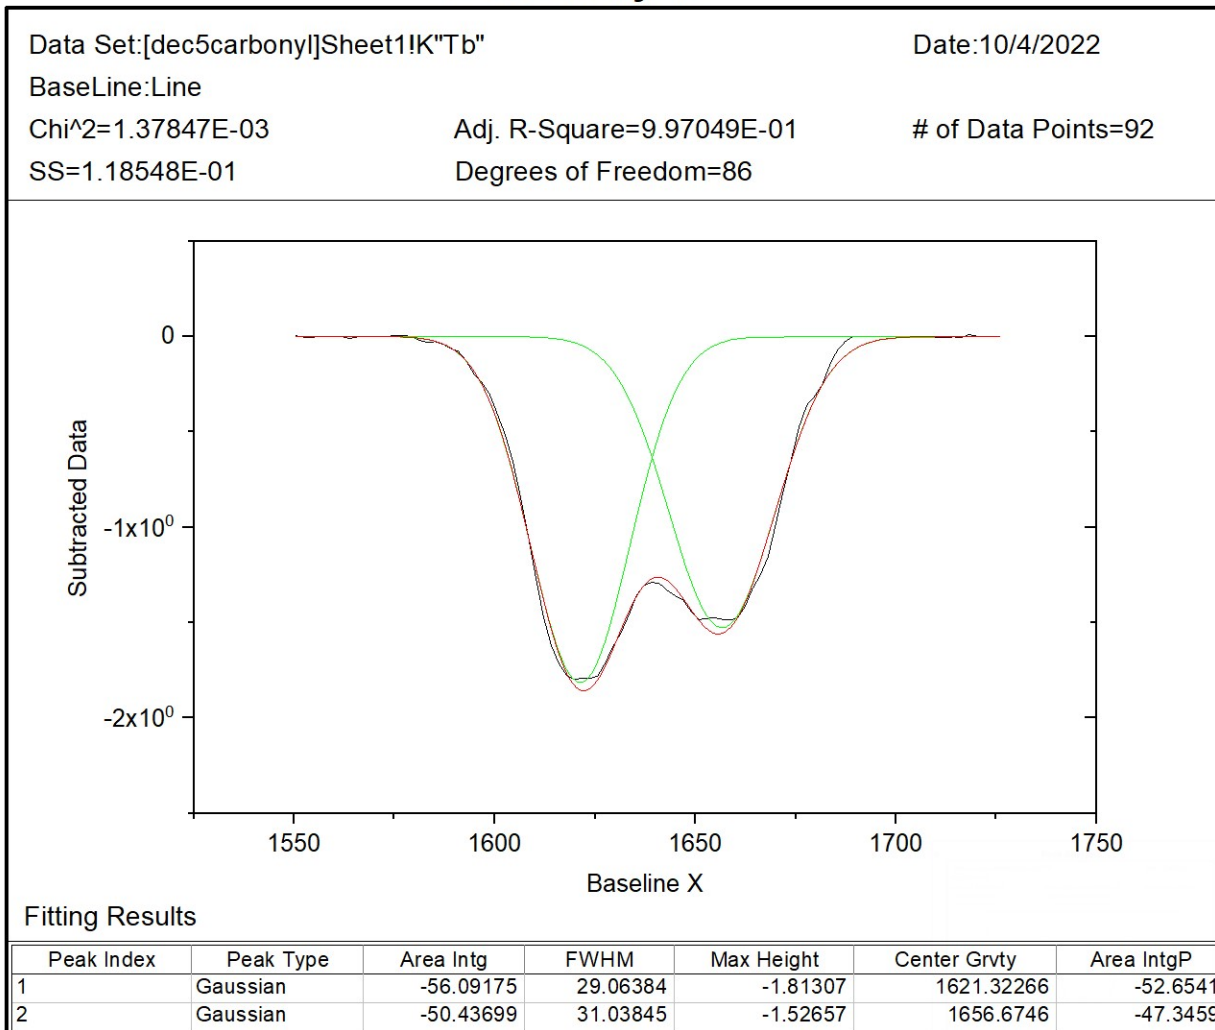

Figure S141. Peak analysis via OriginLab for 0.04 M TODGA with 5 vol% 1-decanol in n-dodecane after contact with 3 mM Tb(NO<sub>3</sub>)<sub>3</sub> in 1 M HNO<sub>3</sub>.

## Peak Analysis

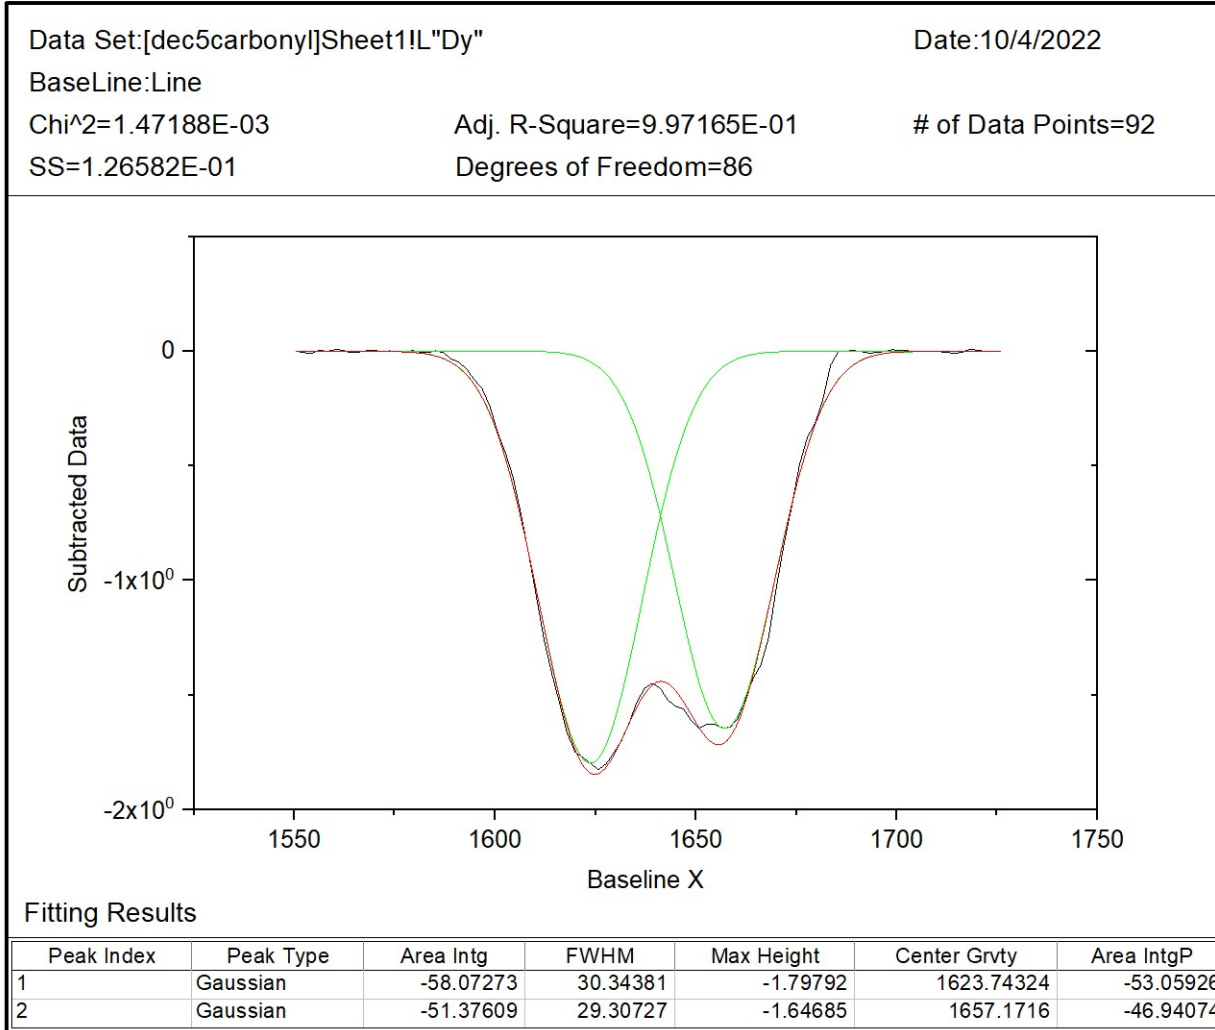

Figure S142. Peak analysis via OriginLab for 0.04 M TODGA with 5 vol% 1-decanol in n-dodecane after contact with 3 mM Dy(NO<sub>3</sub>)<sub>3</sub> in 1 M HNO<sub>3</sub>.

## Peak Analysis

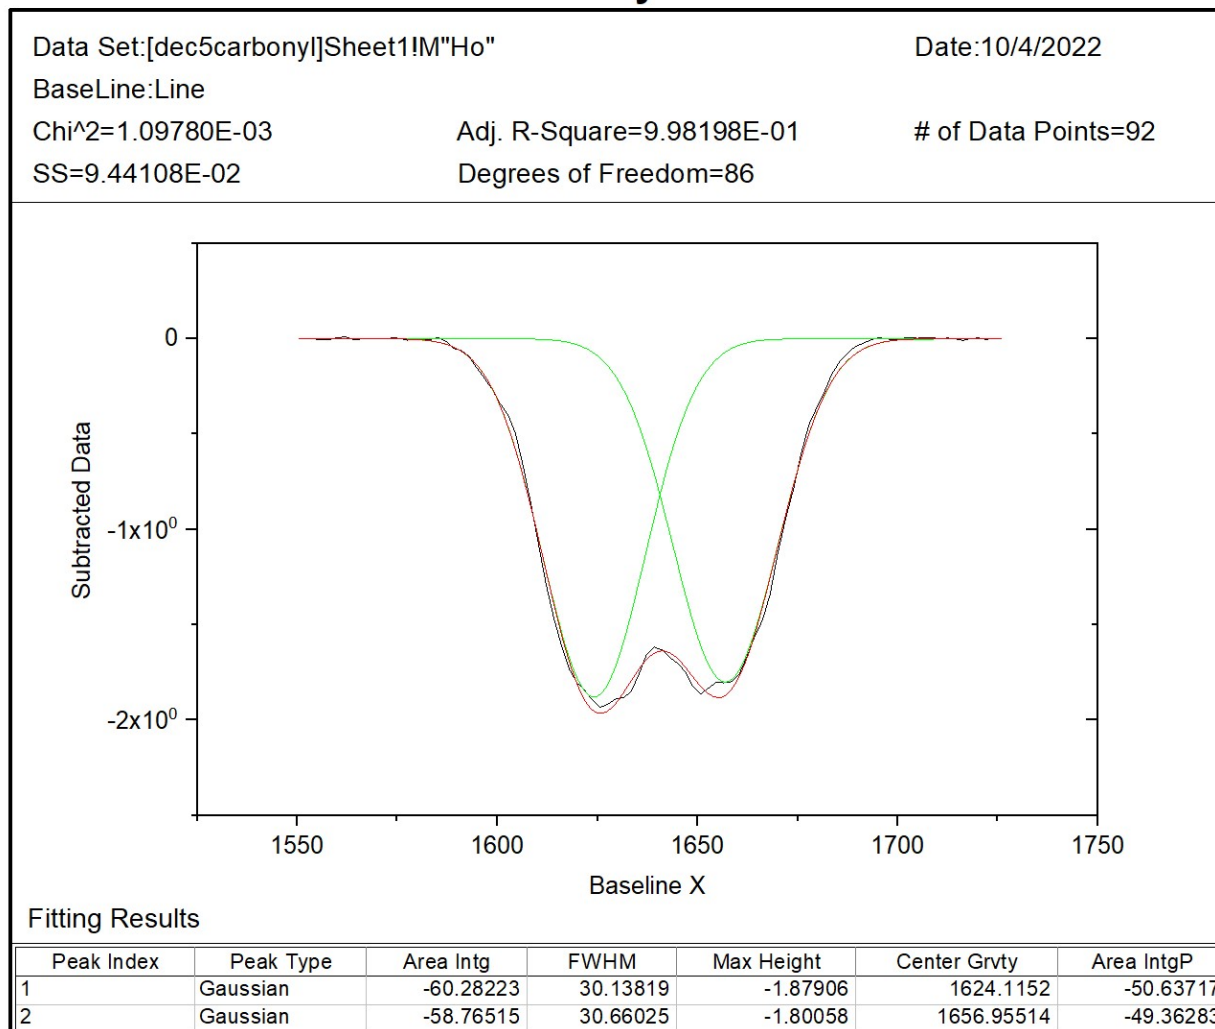

Figure S143. Peak analysis via OriginLab for 0.04 M TODGA with 5 vol% 1-decanol in n-dodecane after contact with 3 mM Ho(NO<sub>3</sub>)<sub>3</sub> in 1 M HNO<sub>3</sub>.

## Peak Analysis

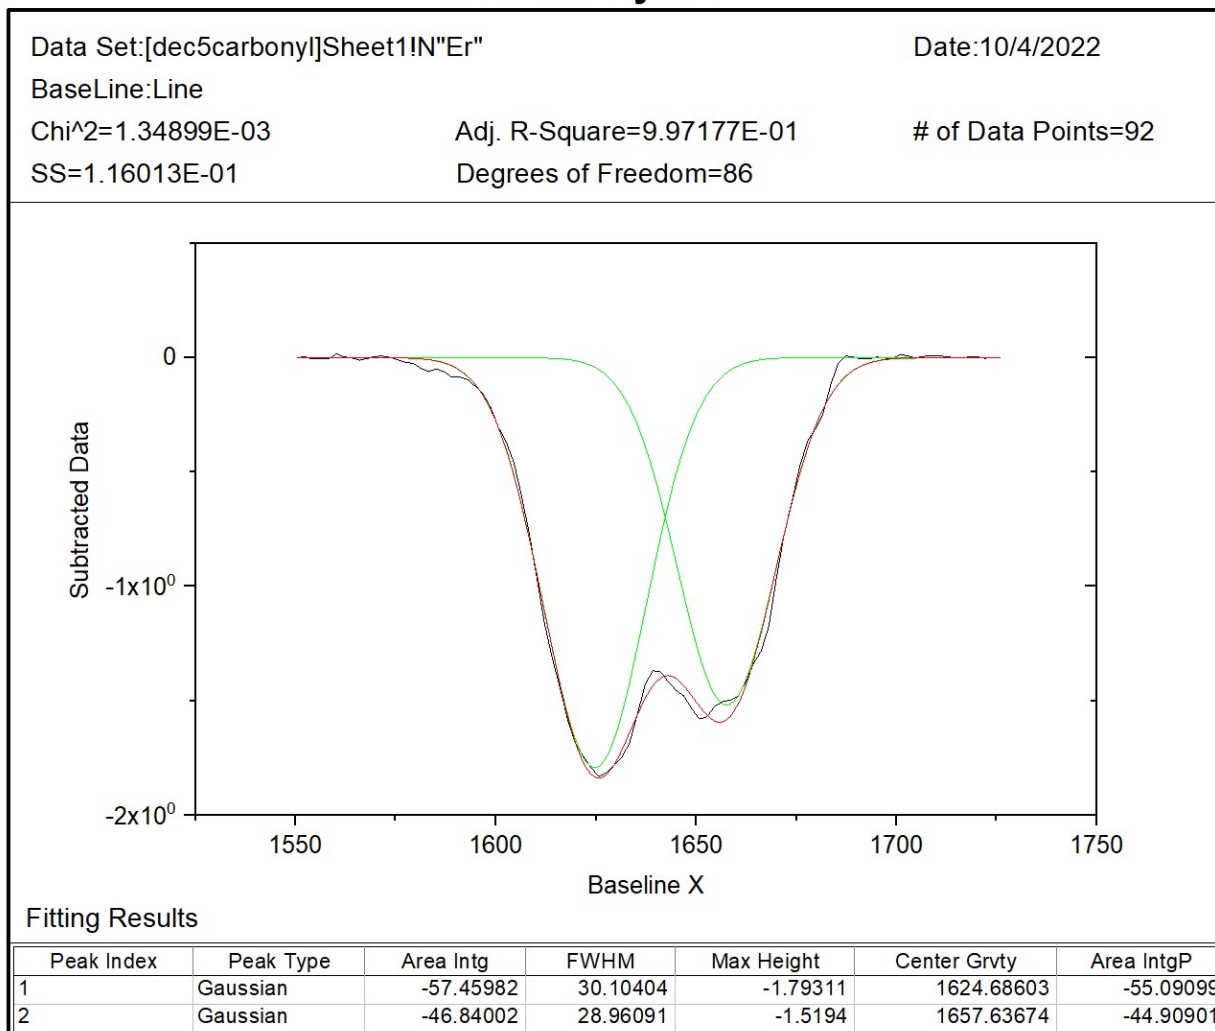

Figure S144. Peak analysis via OriginLab for 0.04 M TODGA with 5 vol% 1-decanol in n-dodecane after contact with 3 mM Er(NO<sub>3</sub>)<sub>3</sub> in 1 M HNO<sub>3</sub>.

## Peak Analysis

Data Set:[dec5carbonyl]Sheet1!O"Tm"

Date:10/4/2022

BaseLine:Line

Chi^2=1.21160E-03

Adj. R-Square=9.98013E-01

# of Data Points=92

SS=1.04198E-01

Degrees of Freedom=86

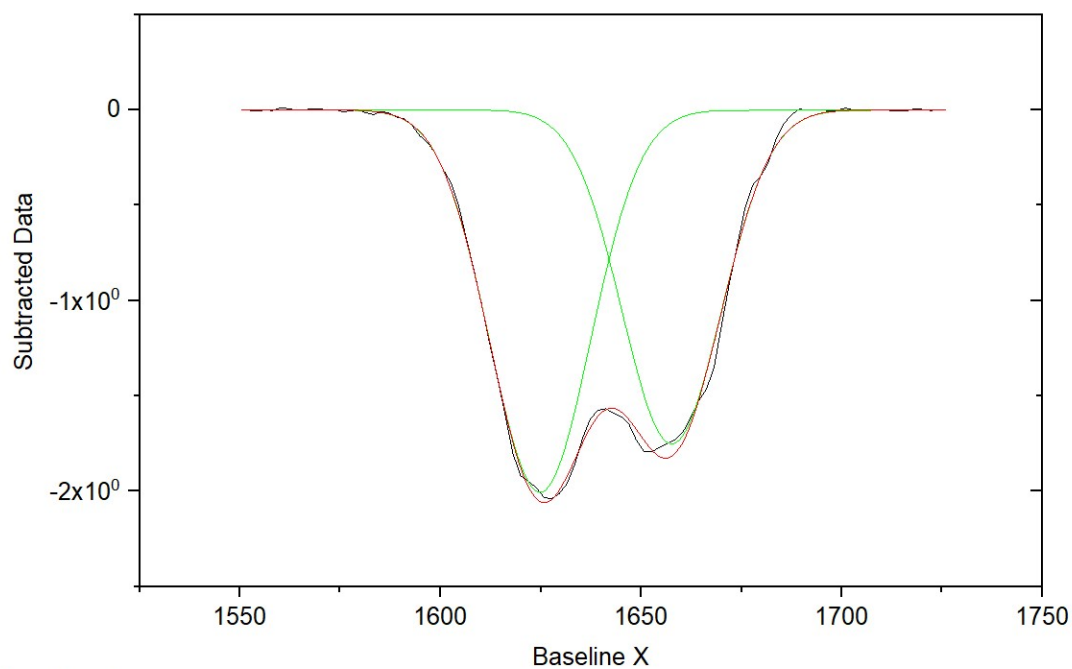

Fitting Results

| Peak Index | Peak Type | Area Intg | FWHM     | Max Height | Center Grvty | Area IntgP |
|------------|-----------|-----------|----------|------------|--------------|------------|
| 1          | Gaussian  | -63.00452 | 29.51513 | -2.00537   | 1624.81668   | -53.83334  |
| 2          | Gaussian  | -54.03173 | 28.97686 | -1.75172   | 1657.63153   | -46.16666  |

Figure S145. Peak analysis via OriginLab for 0.04 M TODGA with 5 vol% 1-decanol in n-dodecane after contact with 3 mM Tm(NO<sub>3</sub>)<sub>3</sub> in 1 M HNO<sub>3</sub>.



## Peak Analysis

Data Set:[dec5carbonyl]Sheet1!P"Yb"

Date:10/4/2022

BaseLine:Line

Chi<sup>2</sup>=1.33193E-03

Adj. R-Square=9.97572E-01

# of Data Points=92

SS=1.14546E-01

Degrees of Freedom=86

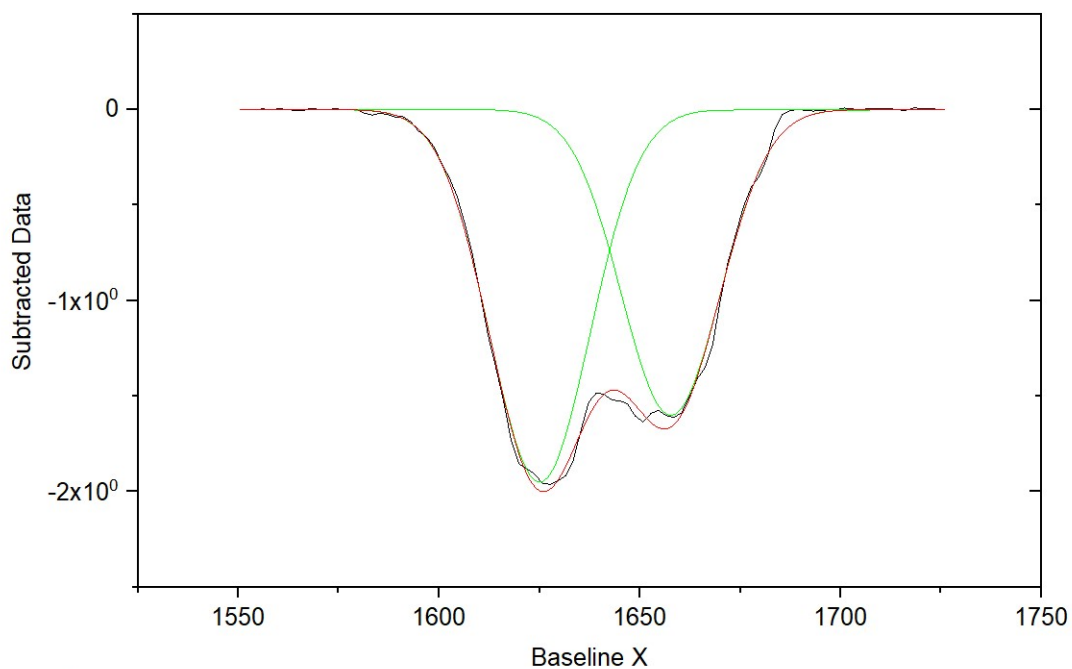

Fitting Results

| Peak Index | Peak Type | Area Intg | FWHM     | Max Height | Center Grvty | Area IntgP |
|------------|-----------|-----------|----------|------------|--------------|------------|
| 1          | Gaussian  | -60.87257 | 29.32084 | -1.95035   | 1625.07011   | -55.31893  |
| 2          | Gaussian  | -49.16674 | 28.86982 | -1.59991   | 1657.71989   | -44.68107  |

Figure S146. Peak analysis via OriginLab for 0.04 M TODGA with 5 vol% 1-decanol in n-dodecane after contact with 3 mM Yb(NO<sub>3</sub>)<sub>3</sub> in 1 M HNO<sub>3</sub>.

## Peak Analysis

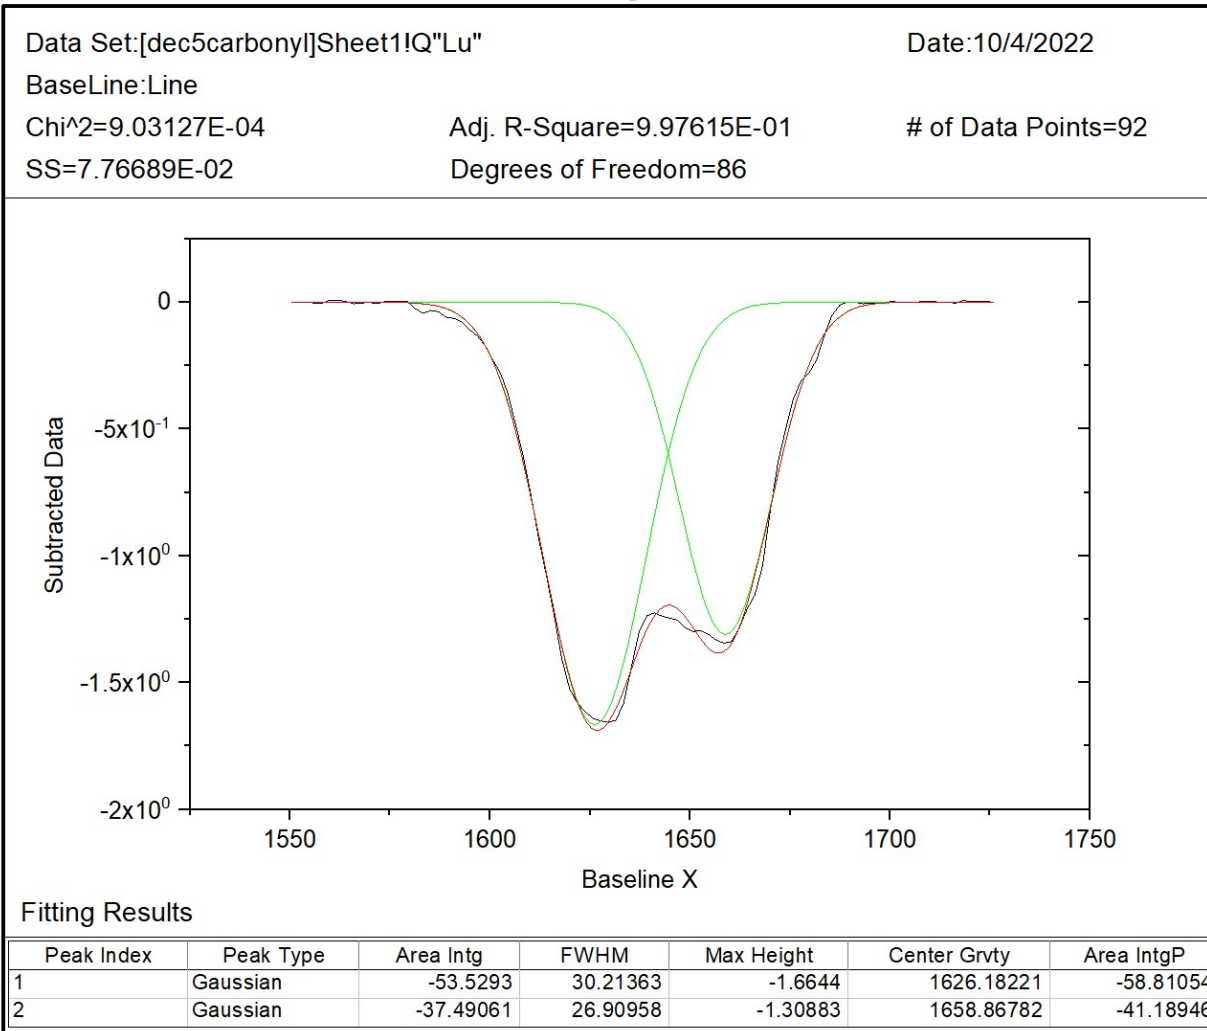

Figure S147. Peak analysis via OriginLab for 0.04 M TODGA with 5 vol% 1-decanol in n-dodecane after contact with 3 mM Lu(NO<sub>3</sub>)<sub>3</sub> in 1 M HNO<sub>3</sub>.

30 vol% 1-decanol

## Peak Analysis

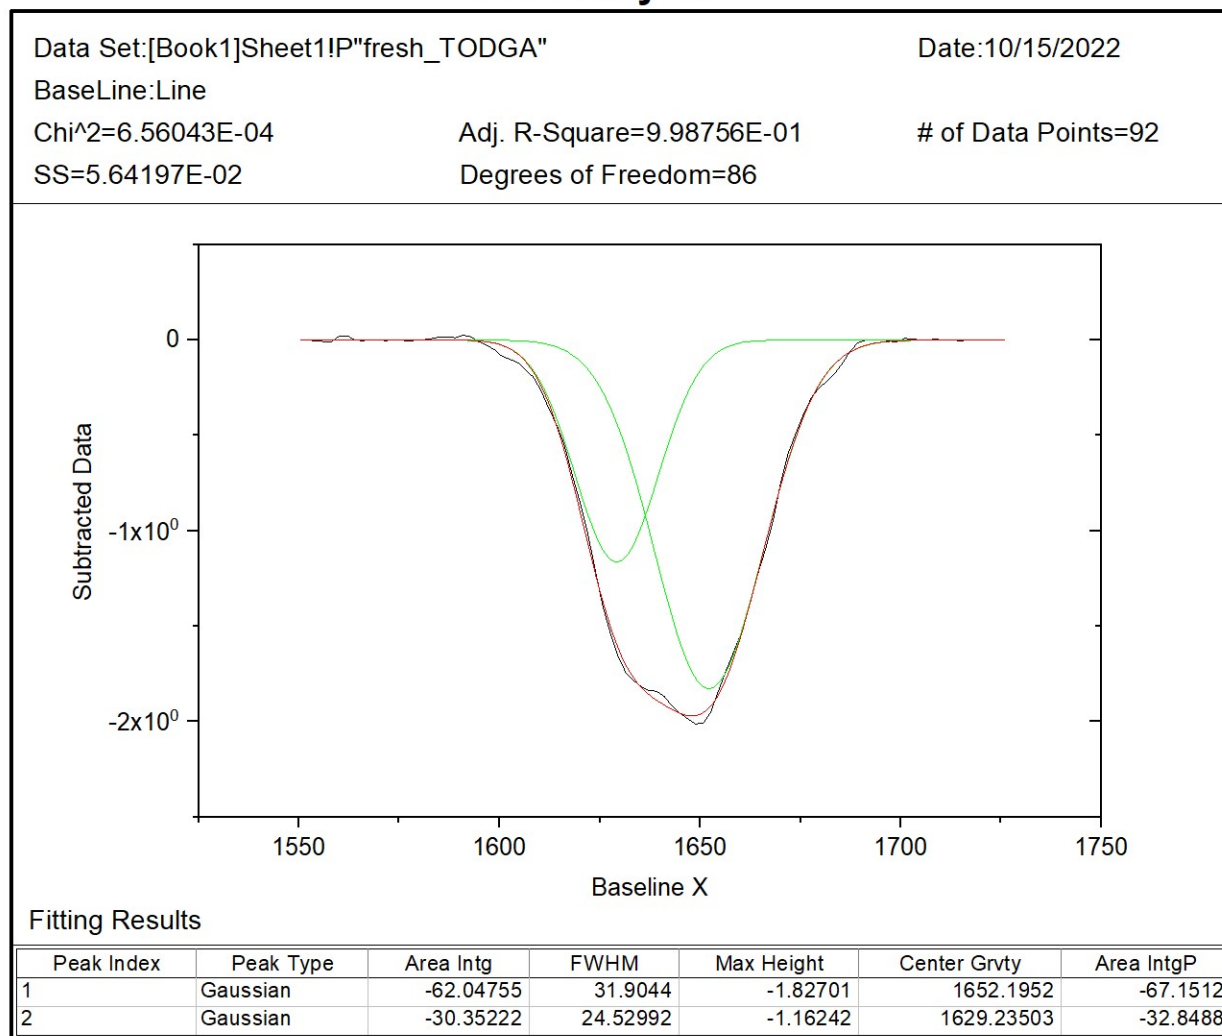

Figure S148. Peak analysis via OriginLab for 0.04 M of fresh TODGA with 30 vol% 1-decanol in n-dodecane.

## Peak Analysis

Data Set:[Book1]Sheet1!Q"preeqm\_TODGA"

Date:10/15/2022

BaseLine:Line

Chi^2=5.76494E-04

Adj. R-Square=9.99098E-01

# of Data Points=92

SS=4.95785E-02

Degrees of Freedom=86

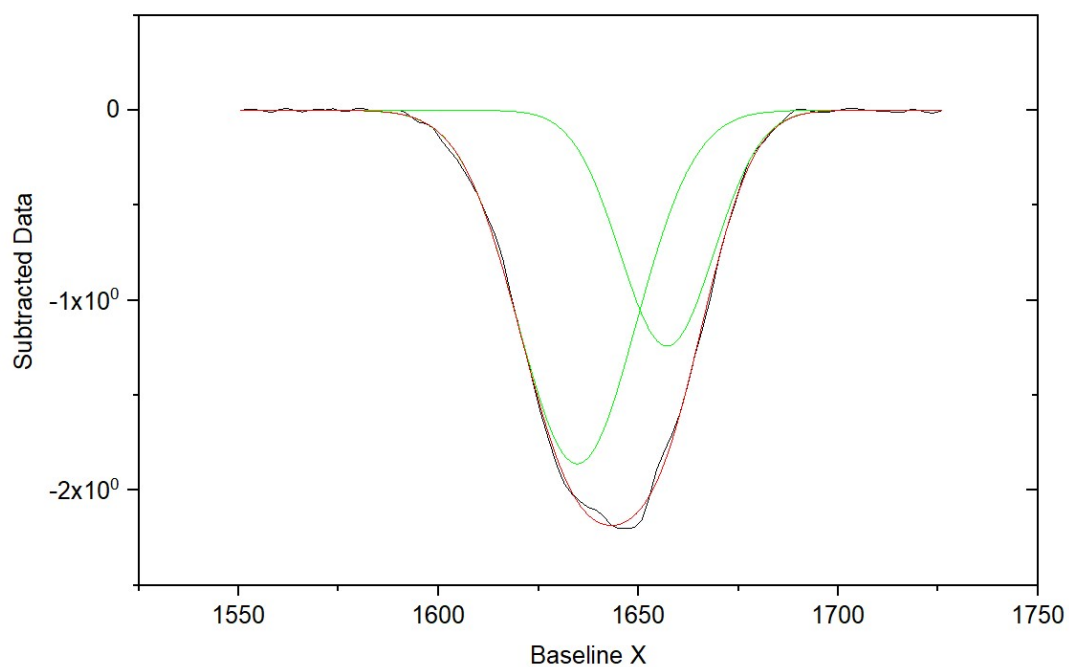

Fitting Results

| Peak Index | Peak Type | Area Intg | FWHM     | Max Height | Center Grvty | Area IntgP |
|------------|-----------|-----------|----------|------------|--------------|------------|
| 1          | Gaussian  | -36.47086 | 27.61871 | -1.24054   | 1657.14482   | -34.74463  |
| 2          | Gaussian  | -68.49748 | 34.58991 | -1.86034   | 1634.68776   | -65.25537  |

Figure S149. Peak analysis via OriginLab for 0.04 M TODGA with 30 vol% 1-decanol in n-dodecane after contact with 1 M HNO<sub>3</sub>.

## Peak Analysis

Data Set:[Book1]Sheet1!B"La"

Date:10/15/2022

BaseLine:Line

Chi<sup>2</sup>=5.37272E-04

Adj. R-Square=9.99133E-01

# of Data Points=92

SS=4.45935E-02

Degrees of Freedom=83

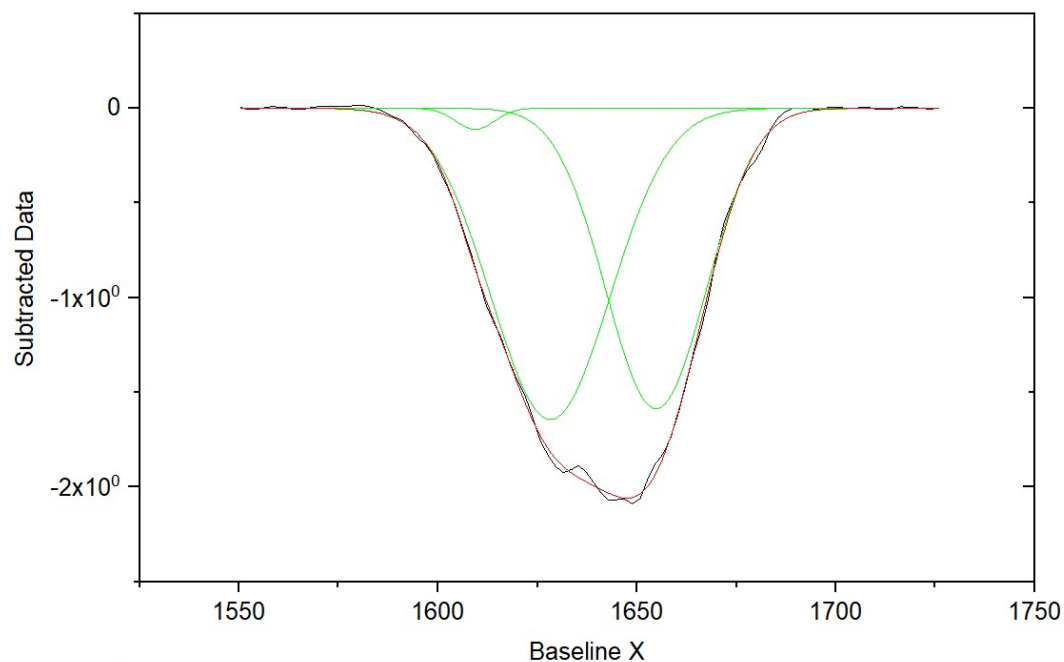

Fitting Results

| Peak Index | Peak Type | Area Intg | FWHM     | Max Height | Center Grvty | Area IntgP |
|------------|-----------|-----------|----------|------------|--------------|------------|
| 1          | Gaussian  | -1.36359  | 11.53383 | -0.11107   | 1609.3498    | -1.20676   |
| 2          | Gaussian  | -61.55226 | 35.19127 | -1.64315   | 1628.29779   | -54.47328  |
| 3          | Gaussian  | -50.07948 | 29.6576  | -1.58632   | 1654.8252    | -44.31996  |

Figure S150. Peak analysis via OriginLab for 0.04 M TODGA with 30 vol% 1-decanol in n-dodecane after contact with 3 mM La(NO<sub>3</sub>)<sub>3</sub> in 1 M HNO<sub>3</sub>.

## Peak Analysis

Data Set:[Book1]Sheet1!C"Ce"

Date:10/15/2022

BaseLine:Line

Chi^2=2.42498E-03

Adj. R-Square=9.92370E-01

# of Data Points=92

SS=2.08548E-01

Degrees of Freedom=86

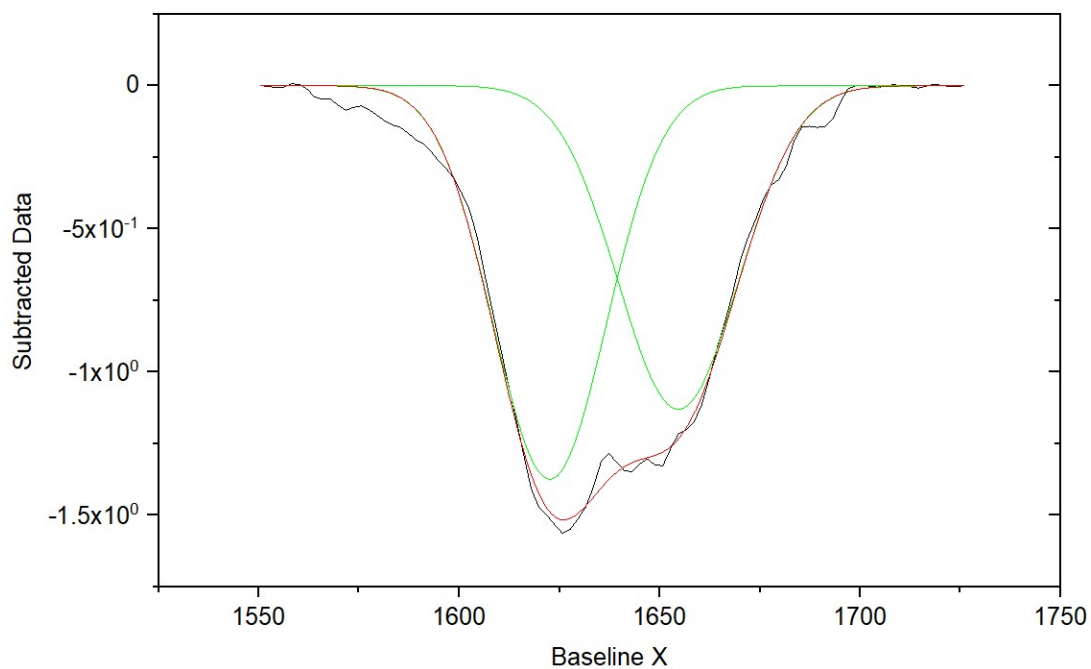

### Fitting Results

| Peak Index | Peak Type | Area Intg | FWHM     | Max Height | Center Grvty | Area IntgP |
|------------|-----------|-----------|----------|------------|--------------|------------|
| 1          | Gaussian  | -48.59256 | 33.21072 | -1.37455   | 1622.58279   | -53.36154  |
| 2          | Gaussian  | -42.47033 | 35.29521 | -1.13042   | 1654.64623   | -46.63846  |

Figure S151. Peak analysis via OriginLab for 0.04 M TODGA with 30 vol% 1-decanol in n-dodecane after contact with 3 mM Ce(NO<sub>3</sub>)<sub>3</sub> in 1 M HNO<sub>3</sub>.

## Peak Analysis

Data Set:[Book1]Sheet1!D"Pr"

Date:10/15/2022

BaseLine:Line

Chi<sup>2</sup>=1.32670E-03

Adj. R-Square=9.97394E-01

# of Data Points=92

SS=1.14096E-01

Degrees of Freedom=86

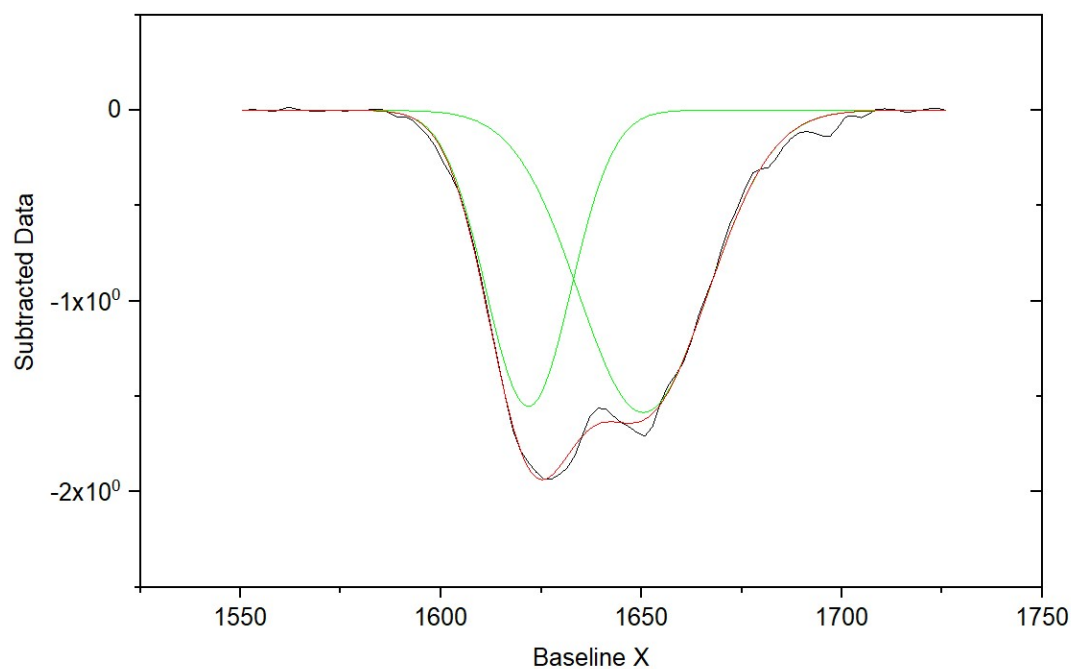

Fitting Results

| Peak Index | Peak Type | Area Intg | FWHM     | Max Height | Center Grvty | Area IntgP |
|------------|-----------|-----------|----------|------------|--------------|------------|
| 1          | Gaussian  | -41.22151 | 24.95836 | -1.55159   | 1621.81963   | -39.22195  |
| 2          | Gaussian  | -63.87656 | 37.87895 | -1.58421   | 1650.46696   | -60.77805  |

Figure S152. Peak analysis via OriginLab for 0.04 M TODGA with 30 vol% 1-decanol in n-dodecane after contact with 3 mM Pr(NO<sub>3</sub>)<sub>3</sub> in 1 M HNO<sub>3</sub>.

## Peak Analysis

Data Set:[Book1]Sheet1!E"Nd"

Date:10/15/2022

BaseLine:Line

Chi<sup>2</sup>=9.80855E-04

Adj. R-Square=9.98557E-01

# of Data Points=92

SS=8.43535E-02

Degrees of Freedom=86

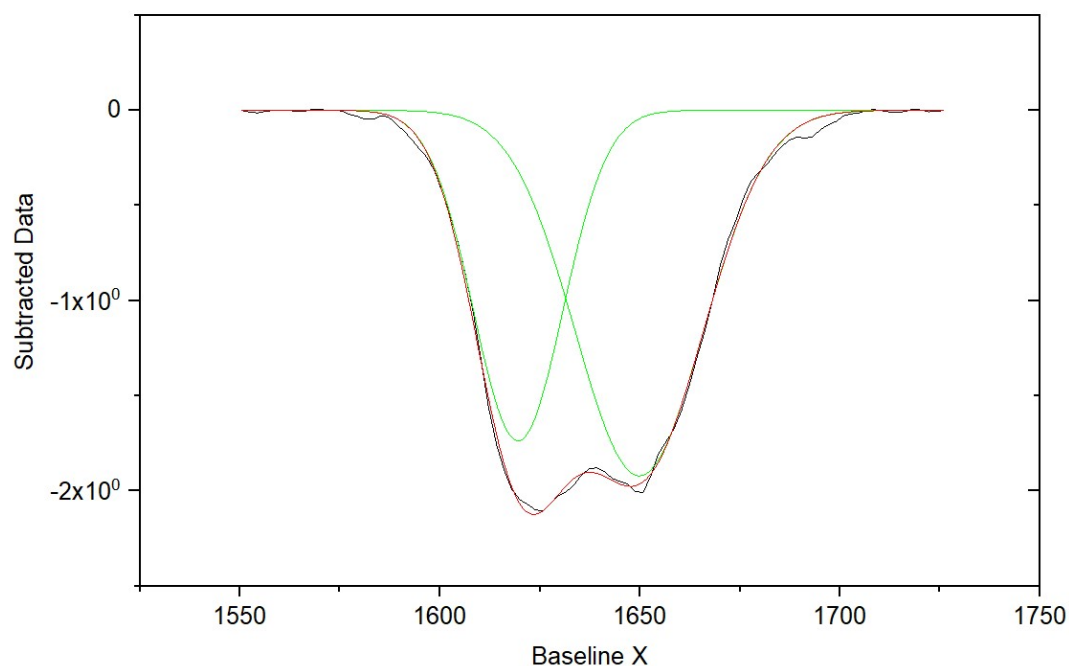

Fitting Results

| Peak Index | Peak Type | Area Intg | FWHM     | Max Height | Center Grvty | Area IntgP |
|------------|-----------|-----------|----------|------------|--------------|------------|
| 1          | Gaussian  | -48.62737 | 26.30796 | -1.73645   | 1619.56285   | -38.73848  |
| 2          | Gaussian  | -76.89995 | 37.6115  | -1.92076   | 1649.85636   | -61.26152  |

Figure S153. Peak analysis via OriginLab for 0.04 M TODGA with 30 vol% 1-decanol in n-dodecane after contact with 3 mM Nd(NO<sub>3</sub>)<sub>3</sub> in 1 M HNO<sub>3</sub>.



## Peak Analysis

Data Set:[Book1]Sheet1!F"Sm"

Date:10/15/2022

BaseLine:Line

Chi<sup>2</sup>=1.04687E-03

Adj. R-Square=9.98464E-01

# of Data Points=92

SS=9.00304E-02

Degrees of Freedom=86

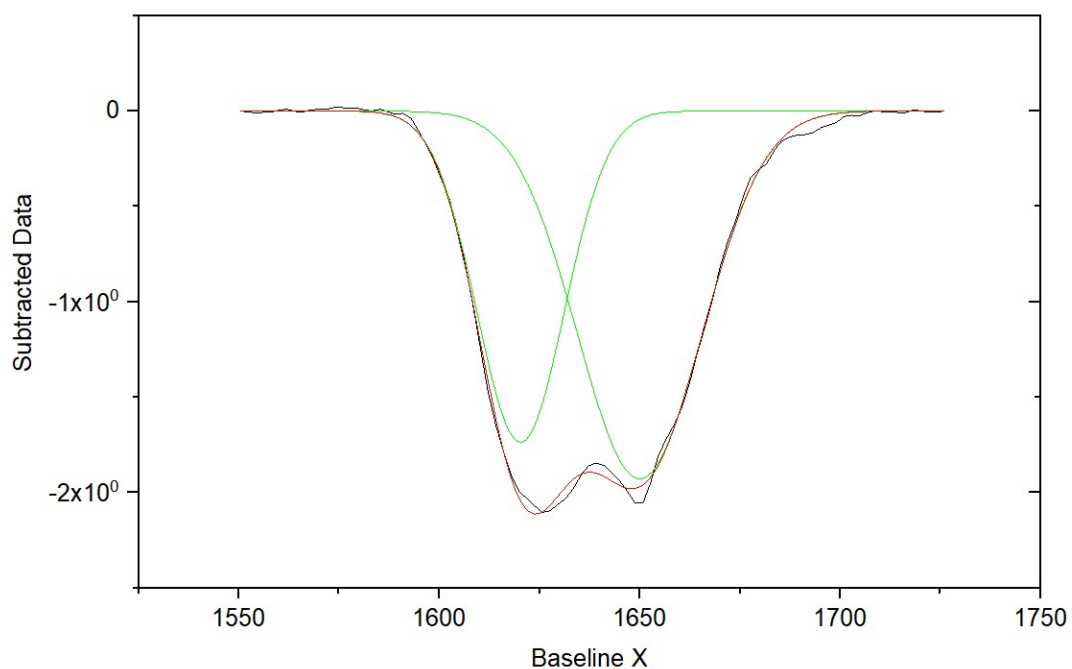

Fitting Results

| Peak Index | Peak Type | Area Intg | FWHM     | Max Height | Center Grvty | Area IntgP |
|------------|-----------|-----------|----------|------------|--------------|------------|
| 1          | Gaussian  | -47.47547 | 25.70067 | -1.73537   | 1620.28029   | -38.71513  |
| 2          | Gaussian  | -75.15222 | 36.62249 | -1.9278    | 1650.02363   | -61.28487  |

Figure S154. Peak analysis via OriginLab for 0.04 M TODGA with 30 vol% 1-decanol in n-dodecane after contact with 3 mM Sm(NO<sub>3</sub>)<sub>3</sub> in 1 M HNO<sub>3</sub>.

## Peak Analysis

Data Set:[Book1]Sheet1!G"Eu"

Date:10/15/2022

BaseLine:Line

Chi^2=1.26489E-03

Adj. R-Square=9.97886E-01

# of Data Points=92

SS=1.08781E-01

Degrees of Freedom=86

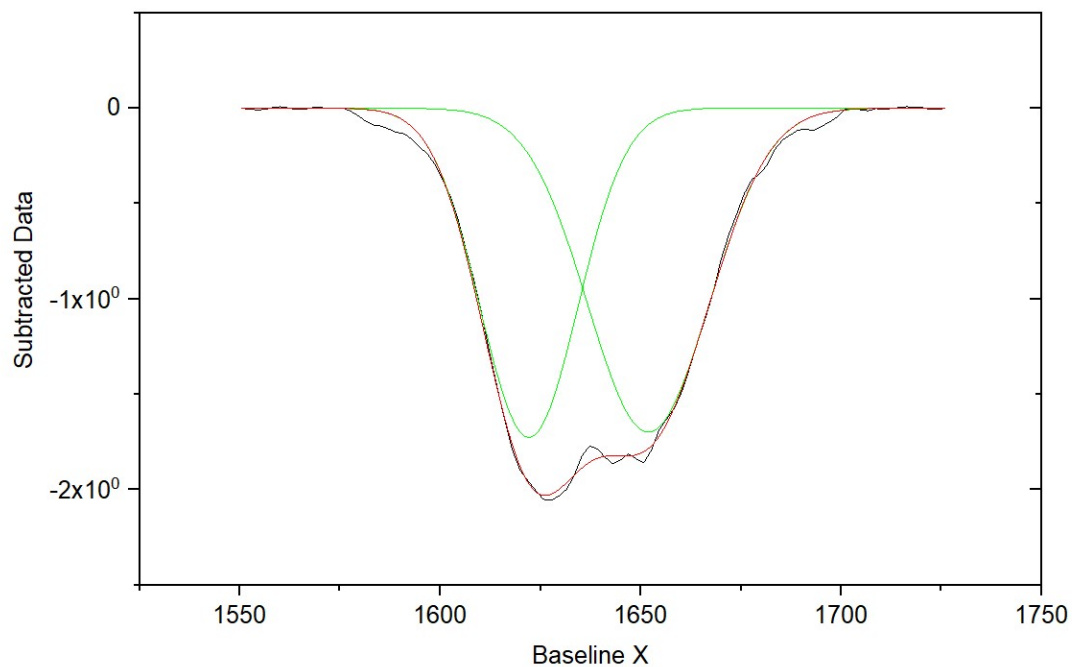

### Fitting Results

| Peak Index | Peak Type | Area Intg | FWHM     | Max Height | Center Grvty | Area IntgP |
|------------|-----------|-----------|----------|------------|--------------|------------|
| 1          | Gaussian  | -52.56753 | 28.6199  | -1.72551   | 1622.11883   | -44.9512   |
| 2          | Gaussian  | -64.37603 | 35.61011 | -1.69832   | 1651.9122    | -55.0488   |

Figure S155. Peak analysis via OriginLab for 0.04 M TODGA with 30 vol% 1-decanol in n-dodecane after contact with 3 mM Eu(NO<sub>3</sub>)<sub>3</sub> in 1 M HNO<sub>3</sub>.

## Peak Analysis

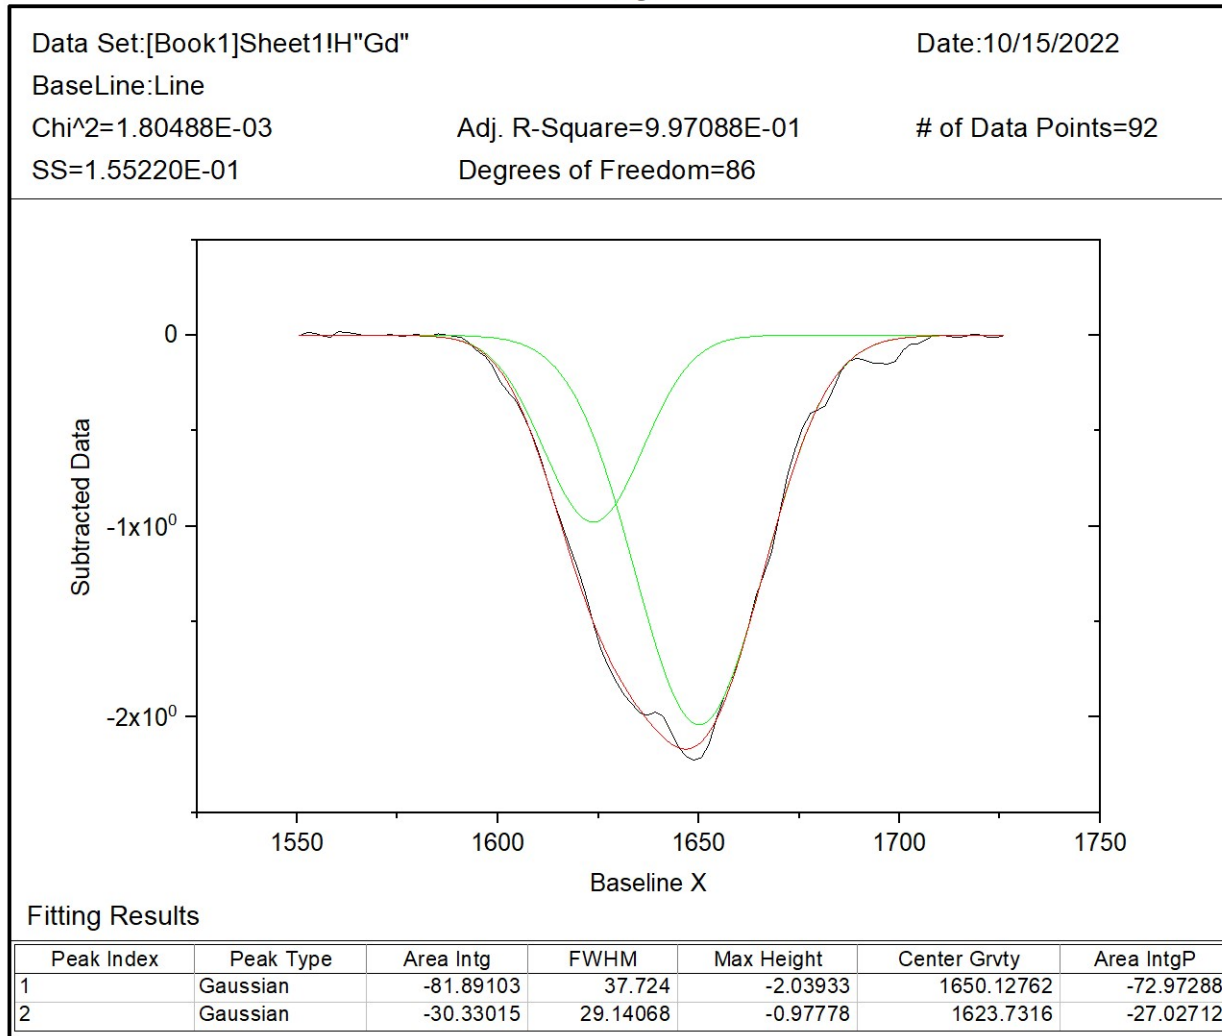

Figure S156. Peak analysis via OriginLab for 0.04 M TODGA with 30 vol% 1-decanol in n-dodecane after contact with 3 mM  $\text{Gd}(\text{NO}_3)_3$  in 1 M  $\text{HNO}_3$ .

## Peak Analysis

Data Set:[Book1]Sheet1!!"Tb"

Date:10/15/2022

BaseLine:Line

Chi^2=8.89756E-04

Adj. R-Square=9.98562E-01

# of Data Points=92

SS=7.65190E-02

Degrees of Freedom=86

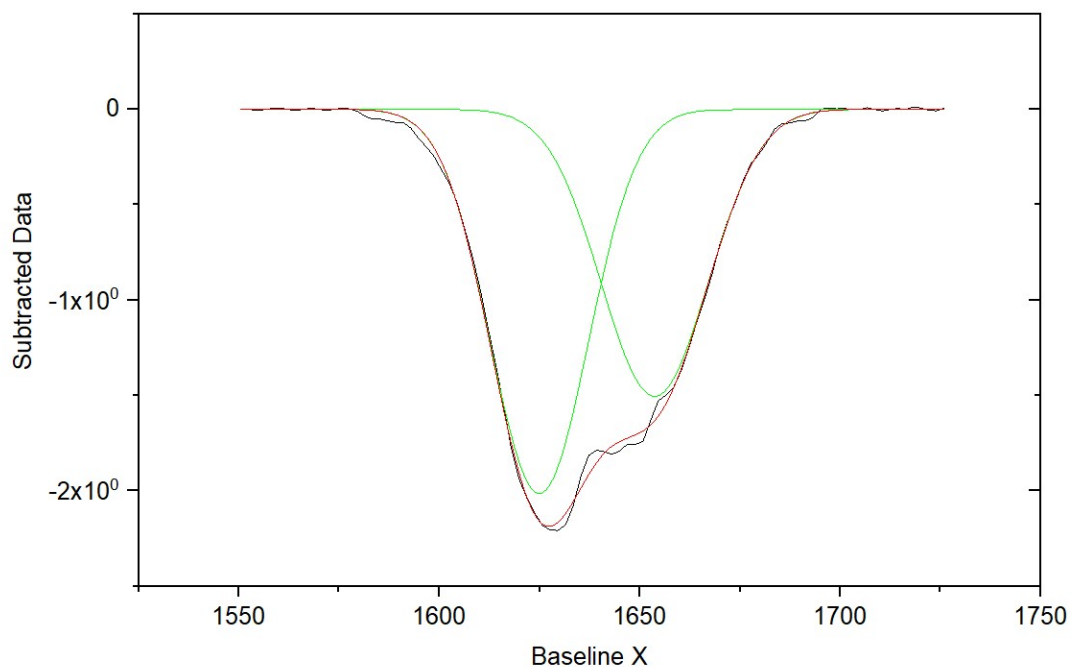

### Fitting Results

| Peak Index | Peak Type | Area Intg | FWHM     | Max Height | Center Grvty | Area IntgP |
|------------|-----------|-----------|----------|------------|--------------|------------|
| 1          | Gaussian  | -61.83017 | 28.84244 | -2.01389   | 1624.95541   | -55.18587  |
| 2          | Gaussian  | -50.20968 | 31.34958 | -1.50461   | 1653.71954   | -44.81413  |

Figure S157. Peak analysis via OriginLab for 0.04 M TODGA with 30 vol% 1-decanol in n-dodecane after contact with 3 mM Tb(NO<sub>3</sub>)<sub>3</sub> in 1 M HNO<sub>3</sub>.

## Peak Analysis

Data Set:[Book1]Sheet1!J"Dy"

Date:10/15/2022

BaseLine:Line

Chi<sup>2</sup>=1.97186E-03

Adj. R-Square=9.96306E-01

# of Data Points=92

SS=1.69580E-01

Degrees of Freedom=86

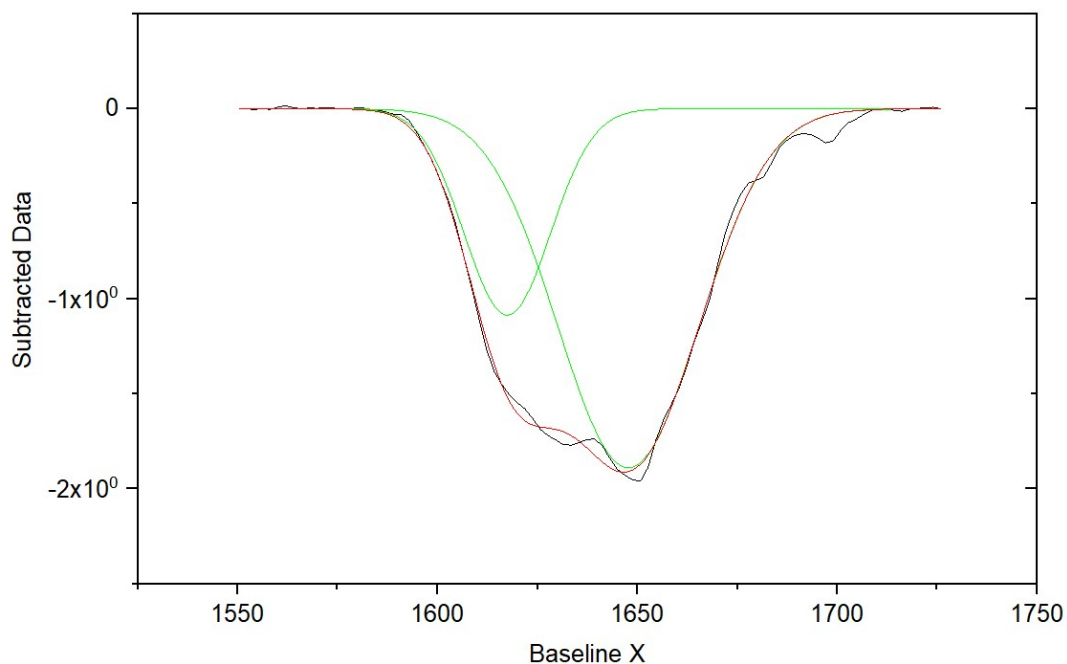

Fitting Results

| Peak Index | Peak Type | Area Intg | FWHM     | Max Height | Center Grvty | Area IntgP |
|------------|-----------|-----------|----------|------------|--------------|------------|
| 1          | Gaussian  | -29.29041 | 25.35055 | -1.08544   | 1617.45557   | -25.9526   |
| 2          | Gaussian  | -83.57078 | 41.56018 | -1.88907   | 1647.7539    | -74.0474   |

Figure S158. Peak analysis via OriginLab for 0.04 M TODGA with 30 vol% 1-decanol in n-dodecane after contact with 3 mM Dy(NO<sub>3</sub>)<sub>3</sub> in 1 M HNO<sub>3</sub>.

## Peak Analysis

Data Set:[Book1]Sheet1!K"Ho"

Date:10/15/2022

BaseLine:Line

Chi<sup>2</sup>=9.76321E-04

Adj. R-Square=9.97841E-01

# of Data Points=92

SS=8.39636E-02

Degrees of Freedom=86

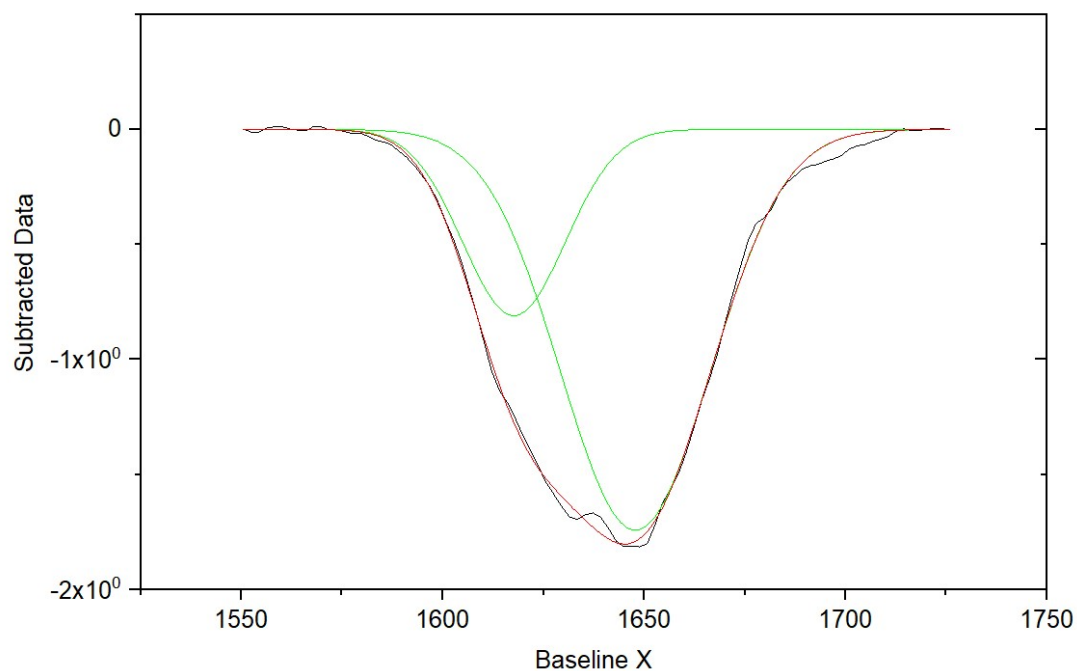

Fitting Results

| Peak Index | Peak Type | Area Intg | FWHM     | Max Height | Center Grvty | Area IntgP |
|------------|-----------|-----------|----------|------------|--------------|------------|
| 1          | Gaussian  | -25.84541 | 29.98756 | -0.80967   | 1617.68108   | -24.15947  |
| 2          | Gaussian  | -81.13298 | 43.74808 | -1.74226   | 1647.84888   | -75.84053  |

Figure S159. Peak analysis via OriginLab for 0.04 M TODGA with 30 vol% 1-decanol in n-dodecane after contact with 3 mM Ho(NO<sub>3</sub>)<sub>3</sub> in 1 M HNO<sub>3</sub>.

## Peak Analysis

Data Set:[Book1]Sheet1!L"Er"

Date:10/15/2022

BaseLine:Line

Chi<sup>2</sup>=8.83512E-04

Adj. R-Square=9.98561E-01

# of Data Points=92

SS=7.59821E-02

Degrees of Freedom=86

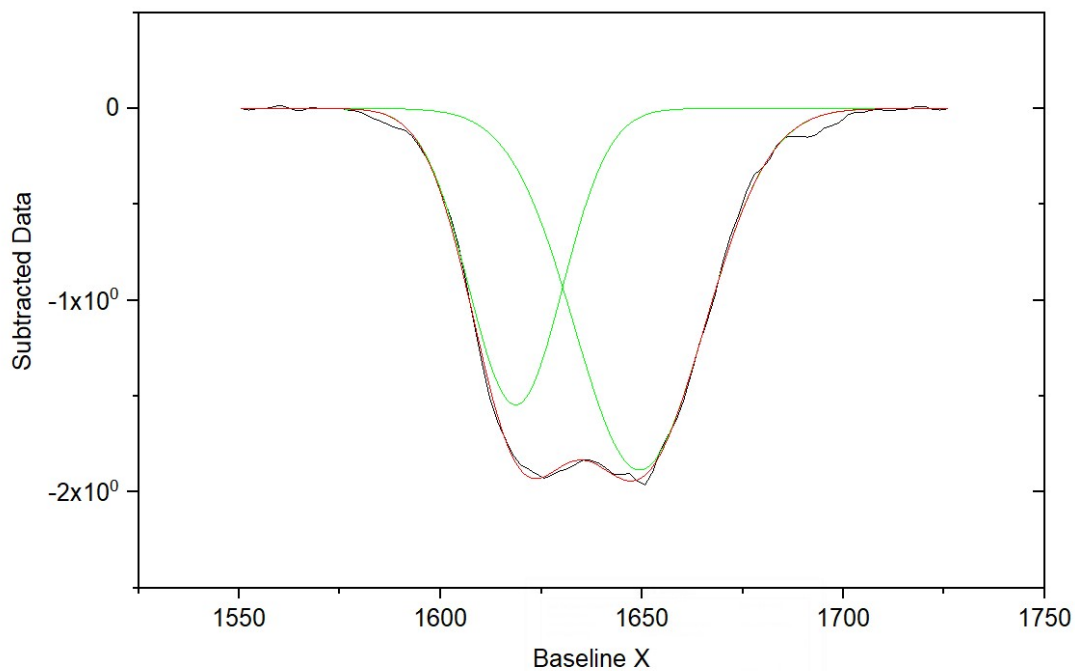

### Fitting Results

| Peak Index | Peak Type | Area Intg | FWHM     | Max Height | Center Grvty | Area IntgP |
|------------|-----------|-----------|----------|------------|--------------|------------|
| 1          | Gaussian  | -44.84467 | 27.25619 | -1.54566   | 1618.65305   | -37.13124  |
| 2          | Gaussian  | -75.92877 | 37.82977 | -1.88556   | 1649.38304   | -62.86876  |

Figure S160. Peak analysis via OriginLab for 0.04 M TODGA with 30 vol% 1-decanol in n-dodecane after contact with 3 mM Er(NO<sub>3</sub>)<sub>3</sub> in 1 M HNO<sub>3</sub>.

## Peak Analysis

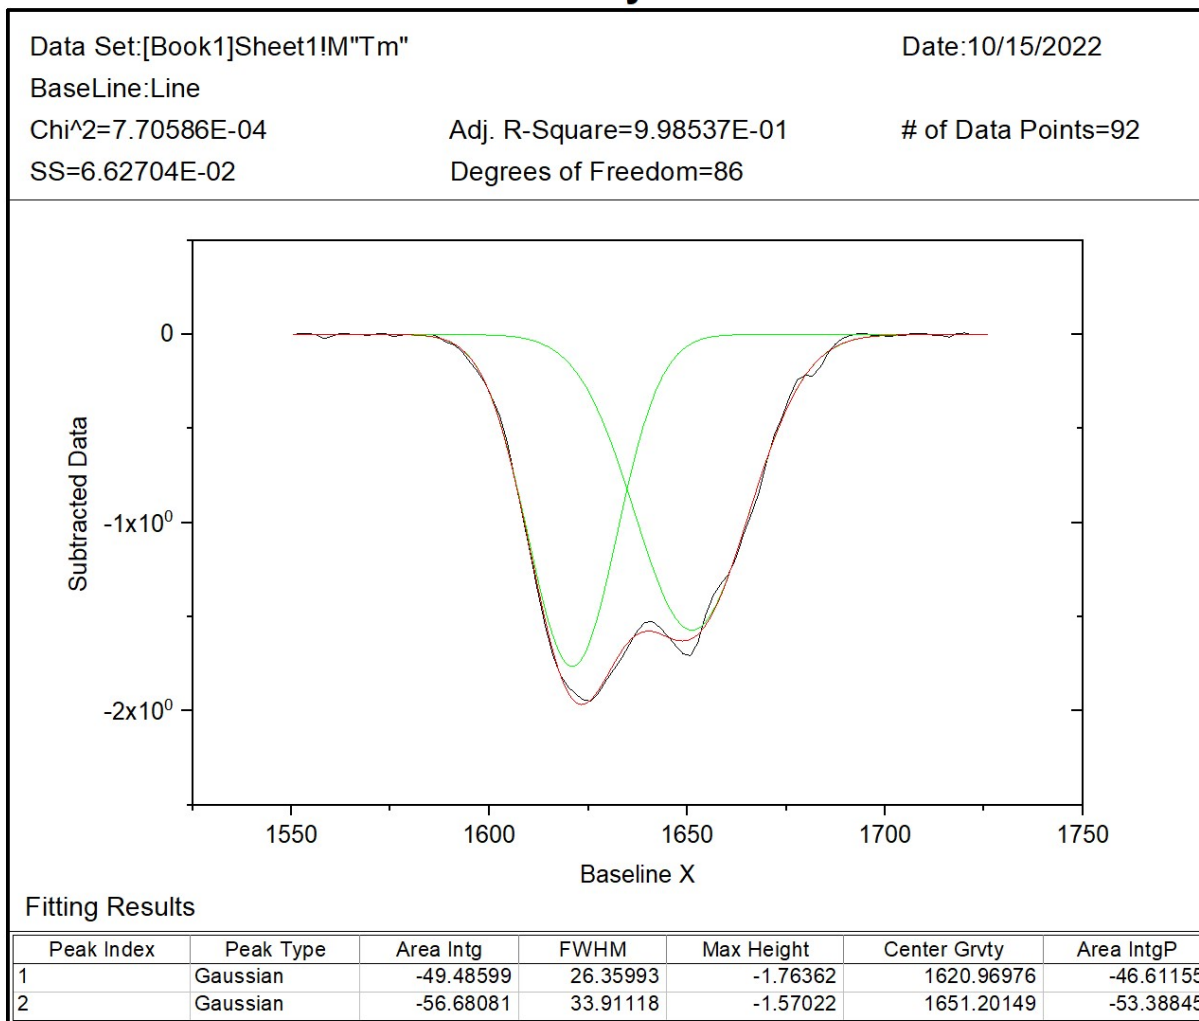

Figure S161. Peak analysis via OriginLab for 0.04 M TODGA with 30 vol% 1-decanol in n-dodecane after contact with 3 mM Tm(NO<sub>3</sub>)<sub>3</sub> in 1 M HNO<sub>3</sub>.



## Peak Analysis

Data Set:[Book1]Sheet1!N"Yb"

Date:10/15/2022

BaseLine:Line

Chi^2=9.23134E-04

Adj. R-Square=9.98646E-01

# of Data Points=92

SS=7.93895E-02

Degrees of Freedom=86

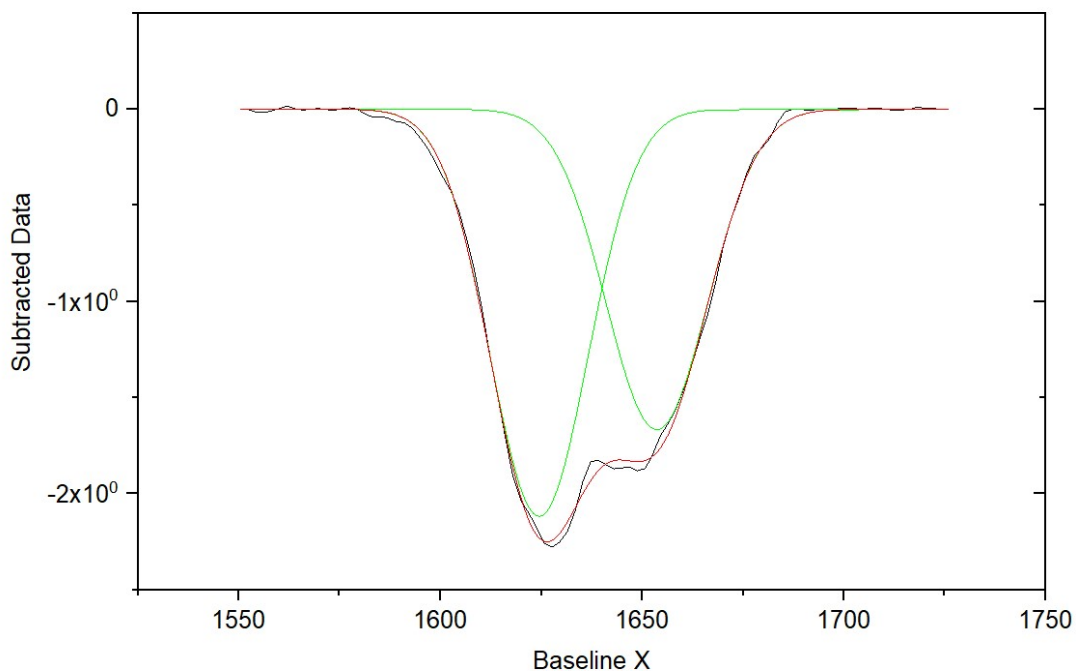

Fitting Results

| Peak Index | Peak Type | Area Intg | FWHM     | Max Height | Center Grvty | Area IntgP |
|------------|-----------|-----------|----------|------------|--------------|------------|
| 1          | Gaussian  | -64.49484 | 28.61147 | -2.11764   | 1624.4727    | -55.11174  |
| 2          | Gaussian  | -52.53075 | 29.61215 | -1.66652   | 1653.63542   | -44.88826  |

Figure S162. Peak analysis via OriginLab for 0.04 M TODGA with 30 vol% 1-decanol in n-dodecane after contact with 3 mM Yb(NO<sub>3</sub>)<sub>3</sub> in 1 M HNO<sub>3</sub>.

## Peak Analysis

Data Set:[Book1]Sheet1!O"Lu"

Date:10/15/2022

BaseLine:Line

Chi^2=1.60487E-03

Adj. R-Square=9.97059E-01

# of Data Points=92

SS=1.38019E-01

Degrees of Freedom=86

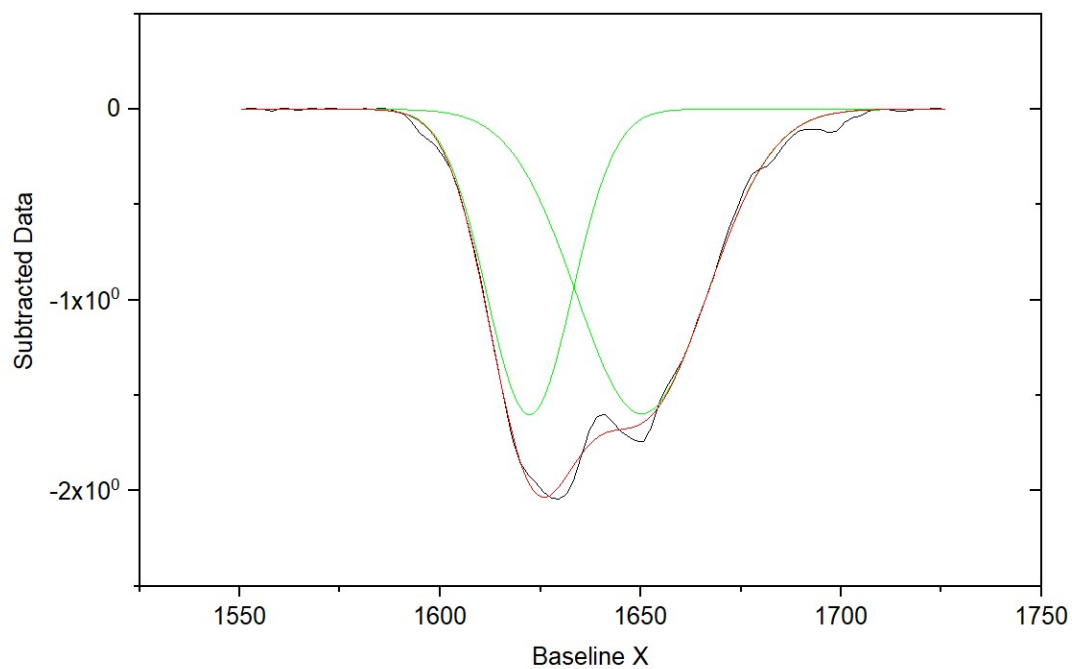

### Fitting Results

| Peak Index | Peak Type | Area Intg | FWHM     | Max Height | Center Grvty | Area IntgP |
|------------|-----------|-----------|----------|------------|--------------|------------|
| 1          | Gaussian  | -42.70204 | 25.06377 | -1.60055   | 1622.2842    | -39.51475  |
| 2          | Gaussian  | -65.36403 | 38.46867 | -1.59625   | 1650.28993   | -60.48525  |

Figure S163. Peak analysis via OriginLab for 0.04 M TODGA with 30 vol% 1-decanol in n-dodecane after contact with 3 mM  $\text{Lu}(\text{NO}_3)_3$  in 1 M  $\text{HNO}_3$ .

5 vol% 1-dodecanol

## Peak Analysis

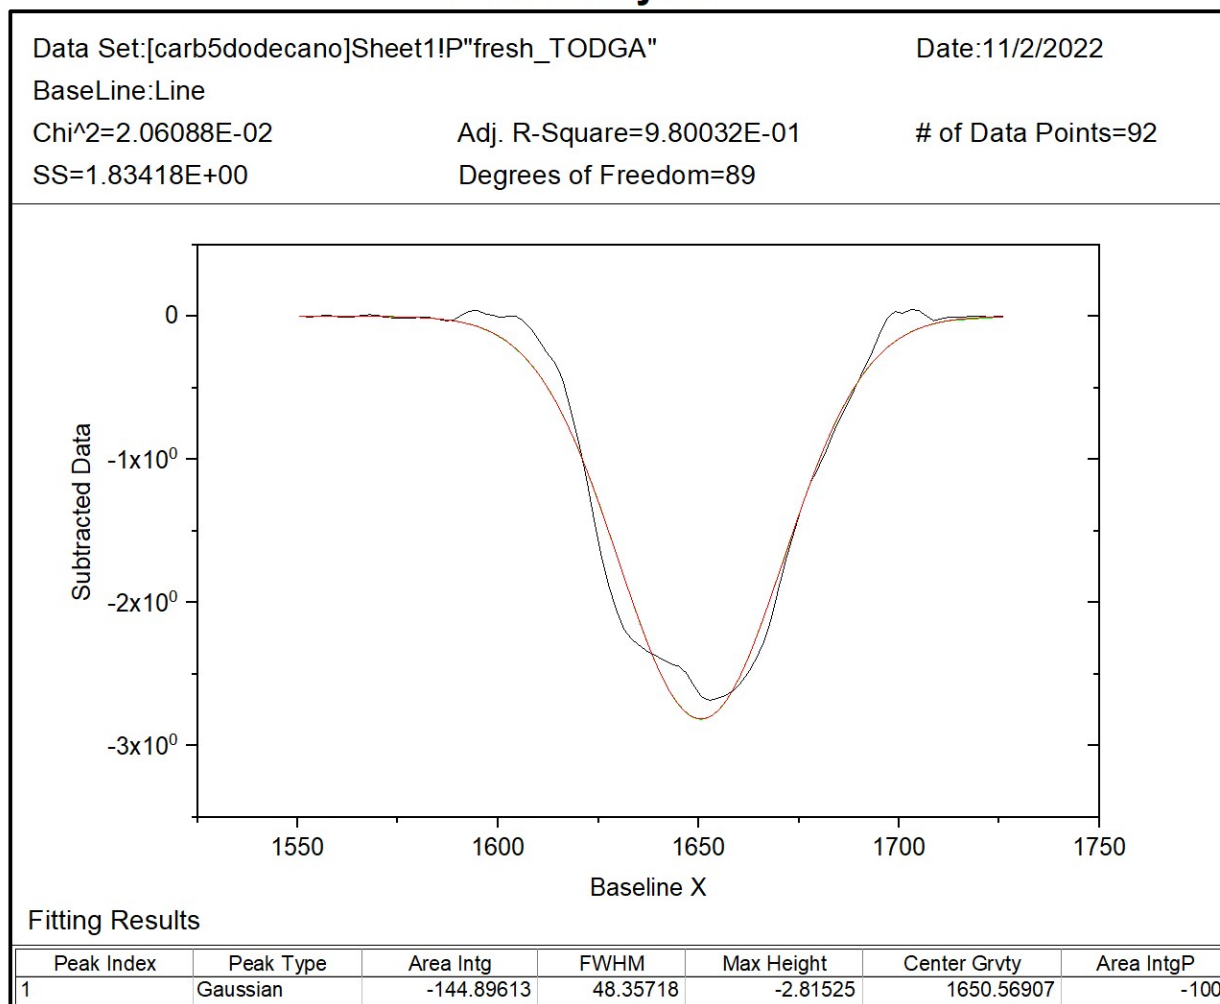

Figure S164. Peak analysis via OriginLab for 0.04 M of fresh TODGA with 5 vol% 1-dodecanol in n-dodecane.

## Peak Analysis

Data Set:[carb5dodecano]Sheet1!Q"preeqm\_TODGA"

Date:11/2/2022

BaseLine:Line

Chi^2=7.24016E-04

Adj. R-Square=9.98603E-01

# of Data Points=92

SS=6.22654E-02

Degrees of Freedom=86

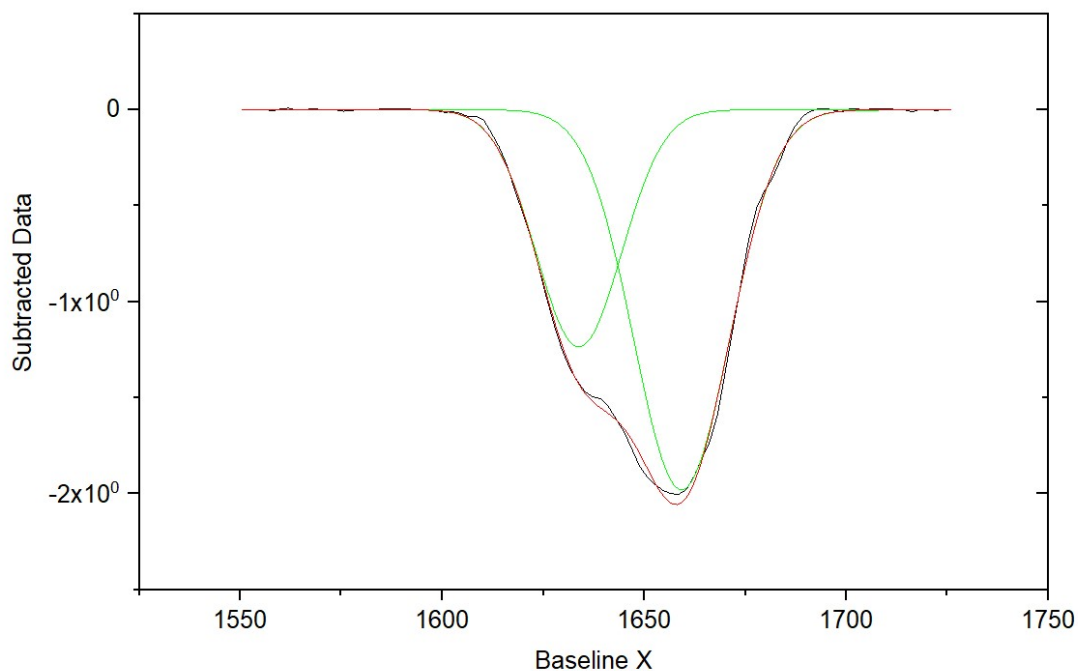

Fitting Results

| Peak Index | Peak Type | Area Intg | FWHM     | Max Height | Center Grvty | Area IntgP |
|------------|-----------|-----------|----------|------------|--------------|------------|
| 1          | Gaussian  | -58.66347 | 27.84912 | -1.9789    | 1659.23201   | -64.26718  |
| 2          | Gaussian  | -32.61714 | 24.82368 | -1.23438   | 1633.80001   | -35.73282  |

Figure S165. Peak analysis via OriginLab for 0.04 M TODGA with 5 vol% 1-dodecanol in n-dodecane after contact with 1 M HNO<sub>3</sub>.

## Peak Analysis

Data Set:[carb5dodecano]Sheet1!H"La"

Date:11/2/2022

BaseLine:Line

Chi<sup>2</sup>=9.00079E-04

Adj. R-Square=9.98226E-01

# of Data Points=92

SS=7.74068E-02

Degrees of Freedom=86

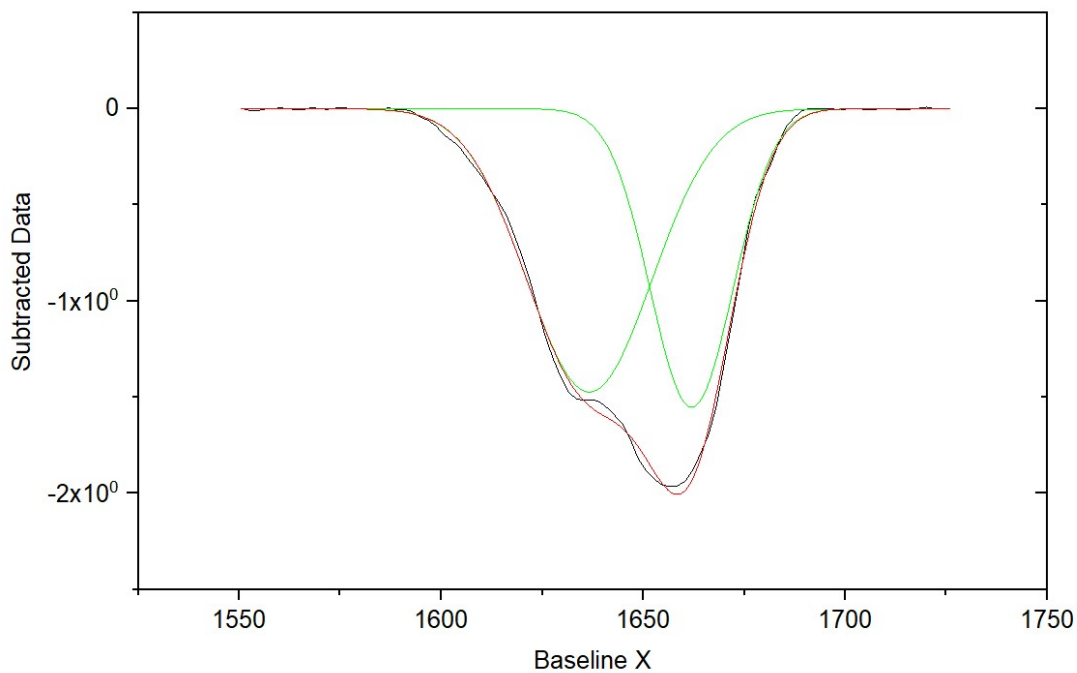

Fitting Results

| Peak Index | Peak Type | Area Intg | FWHM     | Max Height | Center Grvty | Area IntgP |
|------------|-----------|-----------|----------|------------|--------------|------------|
| 1          | Gaussian  | -39.82384 | 24.09903 | -1.55243   | 1661.97571   | -41.12475  |
| 2          | Gaussian  | -57.01283 | 36.35176 | -1.47338   | 1636.66321   | -58.87525  |

Figure S166. Peak analysis via OriginLab for 0.04 M TODGA with 5 vol% 1-dodecanol in n-dodecane after contact with 3 mM La(NO<sub>3</sub>)<sub>3</sub> in 1 M HNO<sub>3</sub>.

## Peak Analysis

Data Set:[carb5dodecano]Sheet1!B"Ce"

Date:11/2/2022

BaseLine:Line

Chi<sup>2</sup>=8.61974E-04

Adj. R-Square=9.98456E-01

# of Data Points=92

SS=7.15439E-02

Degrees of Freedom=83

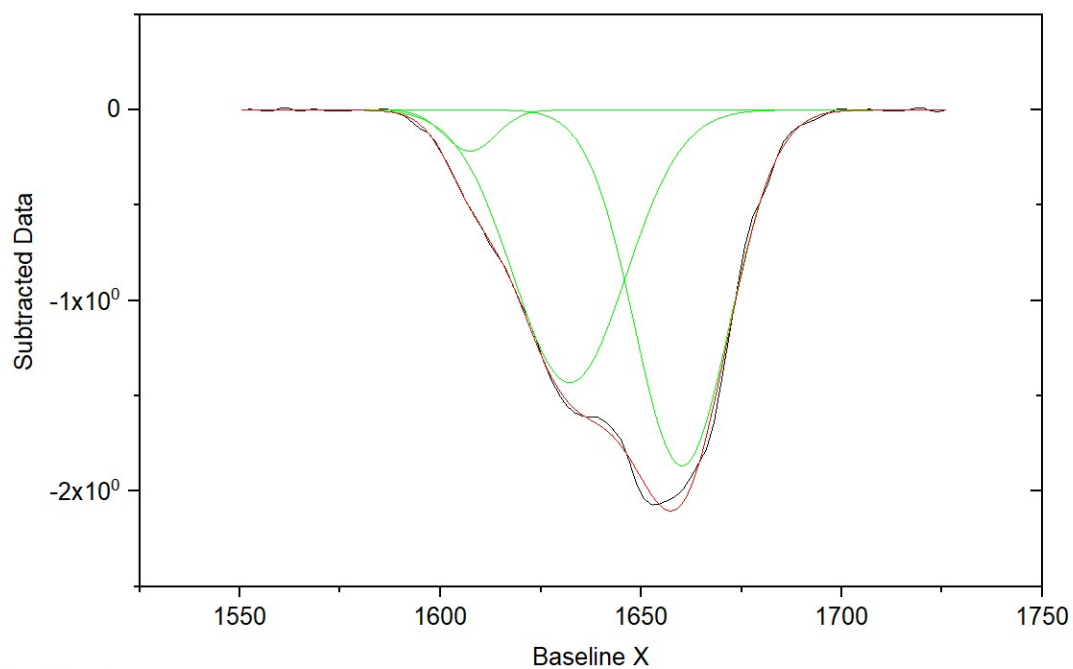

### Fitting Results

| Peak Index | Peak Type | Area Intg | FWHM     | Max Height | Center Grvty | Area IntgP |
|------------|-----------|-----------|----------|------------|--------------|------------|
| 1          | Gaussian  | -55.22131 | 27.78916 | -1.86681   | 1660.17897   | -50.56761  |
| 2          | Gaussian  | -50.46074 | 33.13622 | -1.4306    | 1632.20312   | -46.20823  |
| 3          | Gaussian  | -3.52088  | 15.30689 | -0.21609   | 1607.37859   | -3.22416   |

Figure S167. Peak analysis via OriginLab for 0.04 M TODGA with 5 vol% 1-dodecanol in n-dodecane after contact with 3 mM Ce(NO<sub>3</sub>)<sub>3</sub> in 1 M HNO<sub>3</sub>.

## Peak Analysis

Data Set:[carb5dodecano]Sheet1!K"Pr"

Date:11/2/2022

BaseLine:Line

Chi<sup>2</sup>=5.33840E-04

Adj. R-Square=9.98282E-01

# of Data Points=92

SS=4.43087E-02

Degrees of Freedom=83

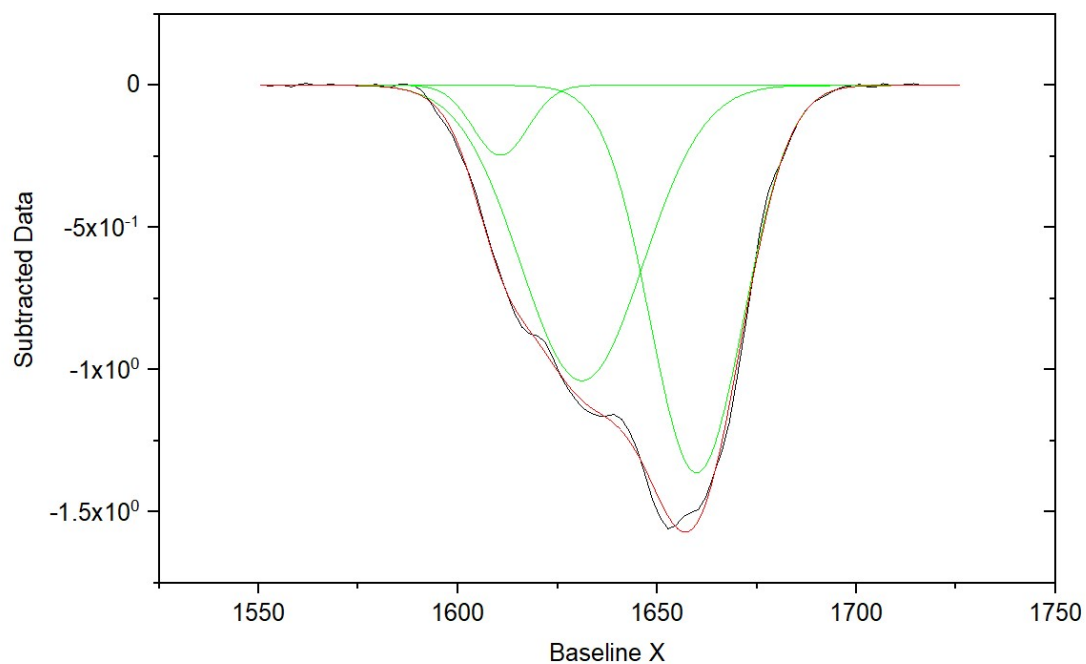

### Fitting Results

| Peak Index | Peak Type | Area Intg | FWHM     | Max Height | Center Grvty | Area IntgP |
|------------|-----------|-----------|----------|------------|--------------|------------|
| 1          | Gaussian  | -39.98271 | 36.16066 | -1.03873   | 1631.11682   | -47.47226  |
| 2          | Gaussian  | -39.9901  | 27.57819 | -1.36224   | 1659.90719   | -47.48103  |
| 3          | Gaussian  | -4.2505   | 16.20619 | -0.24639   | 1610.68162   | -5.04671   |

Figure S168. Peak analysis via OriginLab for 0.04 M TODGA with 5 vol% 1-dodecanol in n-dodecane after contact with 3 mM Pr(NO<sub>3</sub>)<sub>3</sub> in 1 M HNO<sub>3</sub>.

## Peak Analysis

Data Set:[carb5dodecano]Sheet1!J"Nd"

Date:11/2/2022

BaseLine:Line

Chi^2=1.62696E-03

Adj. R-Square=9.95054E-01

# of Data Points=92

SS=1.39919E-01

Degrees of Freedom=86

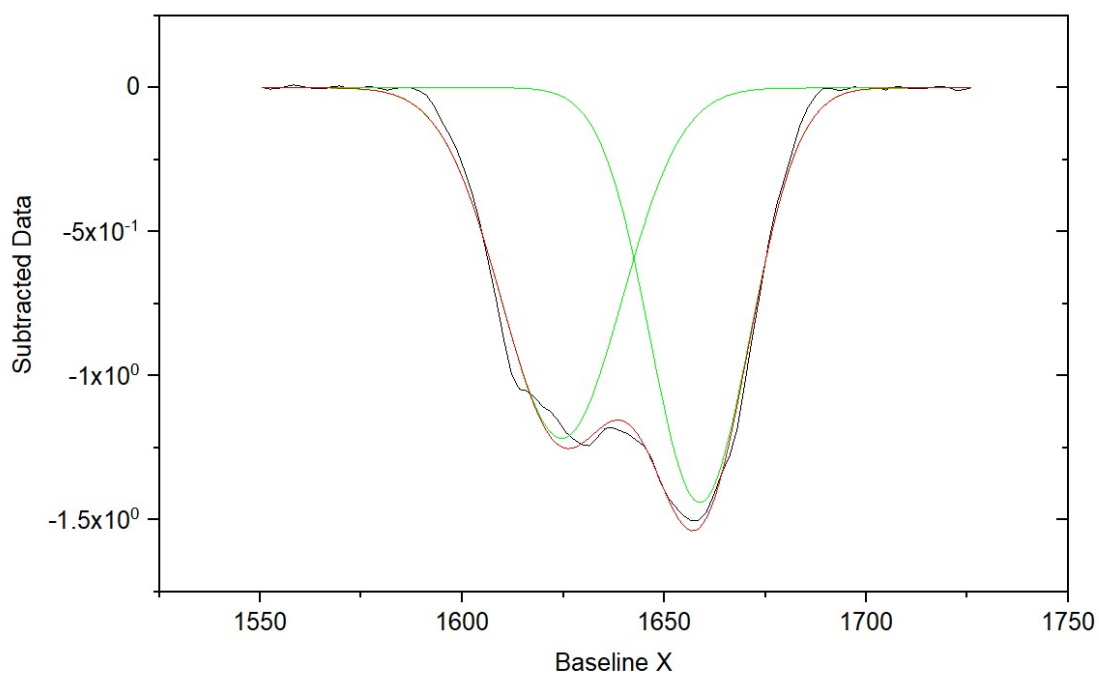

Fitting Results

| Peak Index | Peak Type | Area Intg | FWHM     | Max Height | Center Grvty | Area IntgP |
|------------|-----------|-----------|----------|------------|--------------|------------|
| 1          | Gaussian  | -45.43808 | 35.04962 | -1.21788   | 1624.60896   | -50.64601  |
| 2          | Gaussian  | -44.27893 | 28.88293 | -1.4402    | 1658.80951   | -49.35399  |

Figure S169. Peak analysis via OriginLab for 0.04 M TODGA with 5 vol% 1-dodecanol in n-dodecane after contact with 3 mM Nd(NO<sub>3</sub>)<sub>3</sub> in 1 M HNO<sub>3</sub>.



## Peak Analysis

Data Set:[carb5dodecano]Sheet1!L"Sm"

Date:11/2/2022

BaseLine:Line

Chi<sup>2</sup>=2.98908E-03

Adj. R-Square=9.94856E-01

# of Data Points=92

SS=2.57061E-01

Degrees of Freedom=86

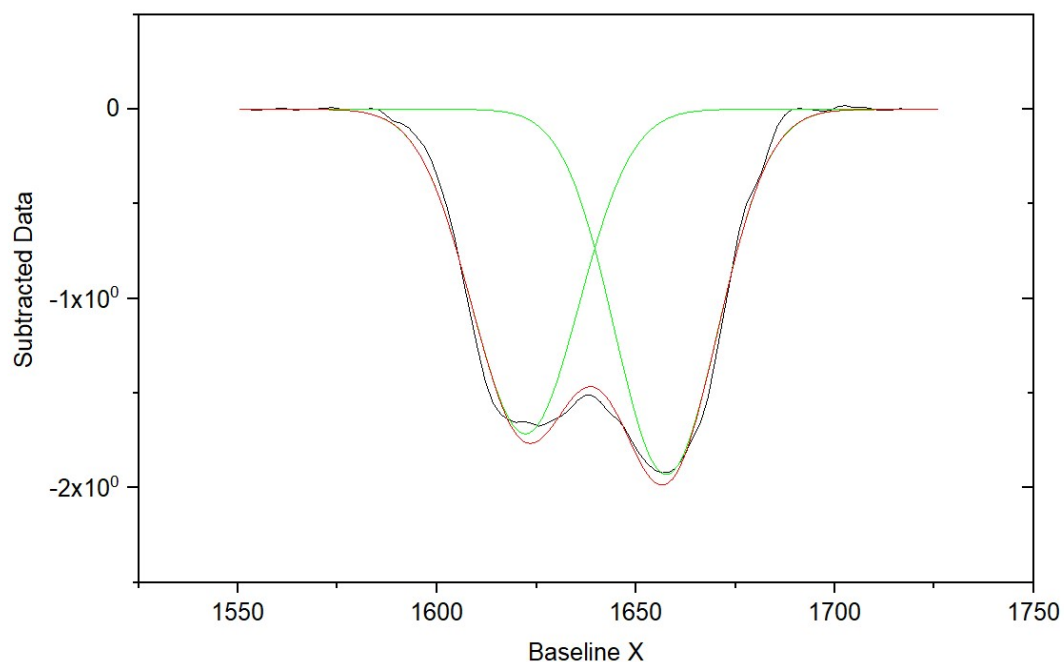

### Fitting Results

| Peak Index | Peak Type | Area Intg | FWHM     | Max Height | Center Grvty | Area IntgP |
|------------|-----------|-----------|----------|------------|--------------|------------|
| 1          | Gaussian  | -57.56198 | 31.54236 | -1.71439   | 1622.20198   | -47.9085   |
| 2          | Gaussian  | -62.58784 | 30.47485 | -1.92937   | 1657.62544   | -52.0915   |

Figure S170. Peak analysis via OriginLab for 0.04 M TODGA with 5 vol% 1-dodecanol in n-dodecane after contact with 3 mM Sm(NO<sub>3</sub>)<sub>3</sub> in 1 M HNO<sub>3</sub>.

## Peak Analysis

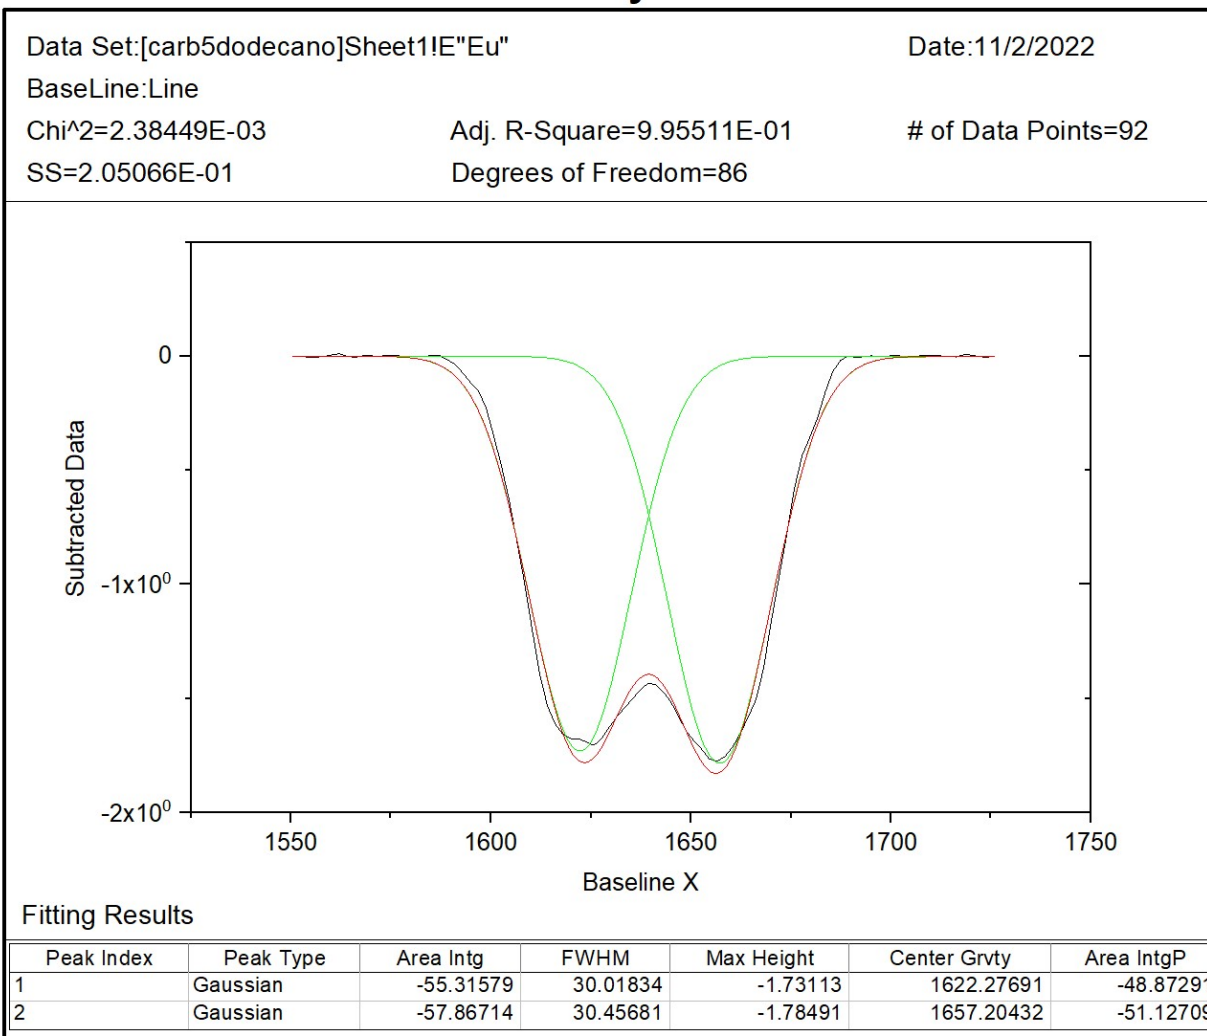

Figure S171. Peak analysis via OriginLab for 0.04 M TODGA with 5 vol% 1-dodecanol in n-dodecane after contact with 3 mM  $\text{Eu}(\text{NO}_3)_3$  in 1 M  $\text{HNO}_3$ .

## Peak Analysis

Data Set:[carb5dodecano]Sheet1!F"Gd"

Date:11/2/2022

BaseLine:Line

Chi<sup>2</sup>=1.15244E-03

Adj. R-Square=9.97474E-01

# of Data Points=92

SS=9.91100E-02

Degrees of Freedom=86

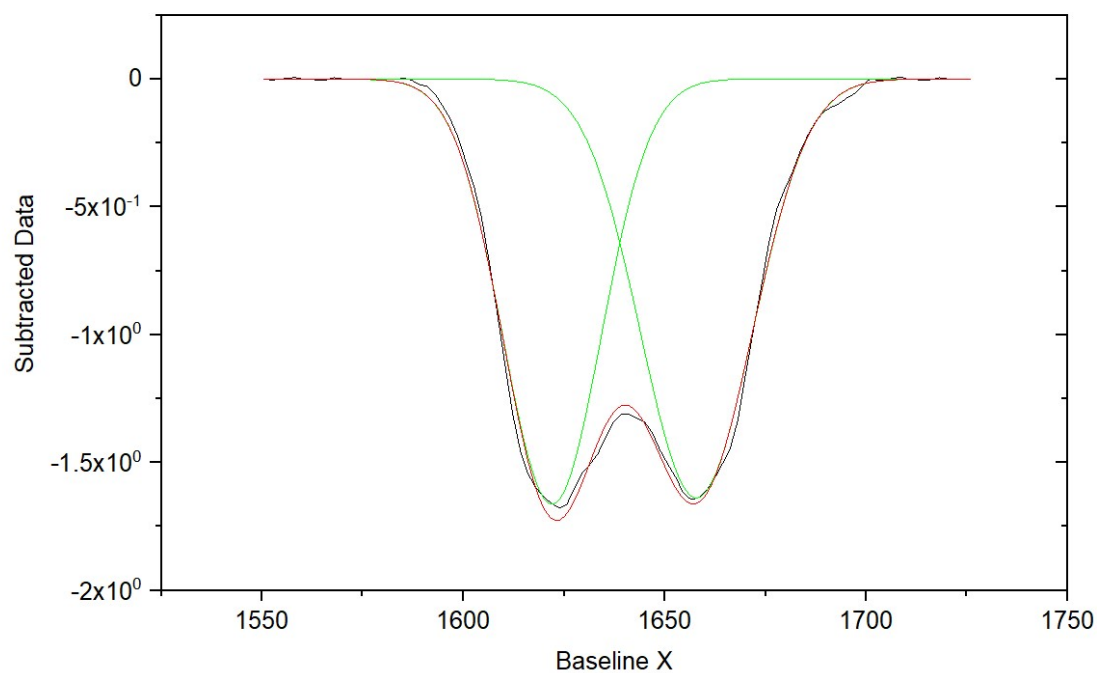

Fitting Results

| Peak Index | Peak Type | Area Intg | FWHM     | Max Height | Center Grvty | Area IntgP |
|------------|-----------|-----------|----------|------------|--------------|------------|
| 1          | Gaussian  | -50.85281 | 28.73984 | -1.66226   | 1622.00797   | -47.17113  |
| 2          | Gaussian  | -56.95213 | 32.6695  | -1.6377    | 1657.87469   | -52.82887  |

Figure S172. Peak analysis via OriginLab for 0.04 M TODGA with 5 vol% 1-dodecanol in n-dodecane after contact with 3 mM Gd(NO<sub>3</sub>)<sub>3</sub> in 1 M HNO<sub>3</sub>.

## Peak Analysis

Data Set:[carb5dodecano]Sheet1!M"Tb"

Date:11/2/2022

BaseLine:Line

Chi^2=2.34433E-03

Adj. R-Square=9.94690E-01

# of Data Points=92

SS=2.01612E-01

Degrees of Freedom=86

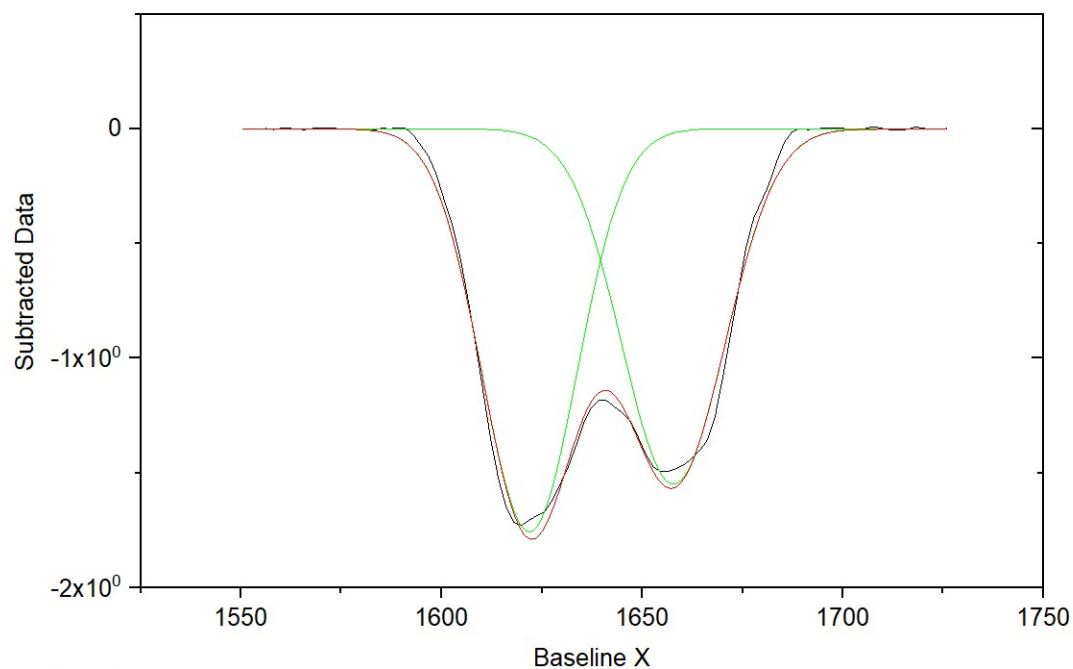

Fitting Results

| Peak Index | Peak Type | Area Intg | FWHM     | Max Height | Center Grvty | Area IntgP |
|------------|-----------|-----------|----------|------------|--------------|------------|
| 1          | Gaussian  | -52.17959 | 27.90644 | -1.75656   | 1621.89139   | -51.09971  |
| 2          | Gaussian  | -49.93368 | 30.27935 | -1.54923   | 1657.77506   | -48.90029  |

Figure S173. Peak analysis via OriginLab for 0.04 M TODGA with 5 vol% 1-dodecanol in n-dodecane after contact with 3 mM Tb(NO<sub>3</sub>)<sub>3</sub> in 1 M HNO<sub>3</sub>.

## Peak Analysis

Data Set:[carb5dodecano]Sheet1!C"Dy"

Date:11/2/2022

BaseLine:Line

Chi<sup>2</sup>=1.44387E-03

Adj. R-Square=9.97359E-01

# of Data Points=92

SS=1.24173E-01

Degrees of Freedom=86

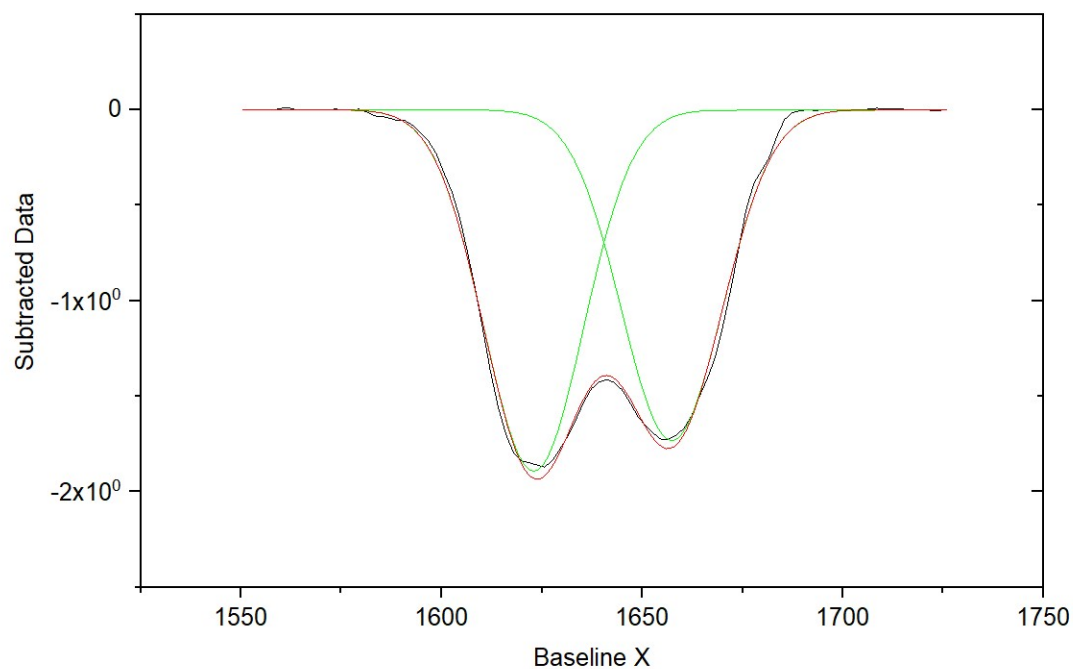

Fitting Results

| Peak Index | Peak Type | Area Intg | FWHM     | Max Height | Center Grvty | Area IntgP |
|------------|-----------|-----------|----------|------------|--------------|------------|
| 1          | Gaussian  | -58.69886 | 29.15524 | -1.89139   | 1622.97657   | -51.91127  |
| 2          | Gaussian  | -54.3765  | 29.51241 | -1.73091   | 1657.39407   | -48.08873  |

Figure S174. Peak analysis via OriginLab for 0.04 M TODGA with 5 vol% 1-dodecanol in n-dodecane after contact with 3 mM Dy(NO<sub>3</sub>)<sub>3</sub> in 1 M HNO<sub>3</sub>.

## Peak Analysis

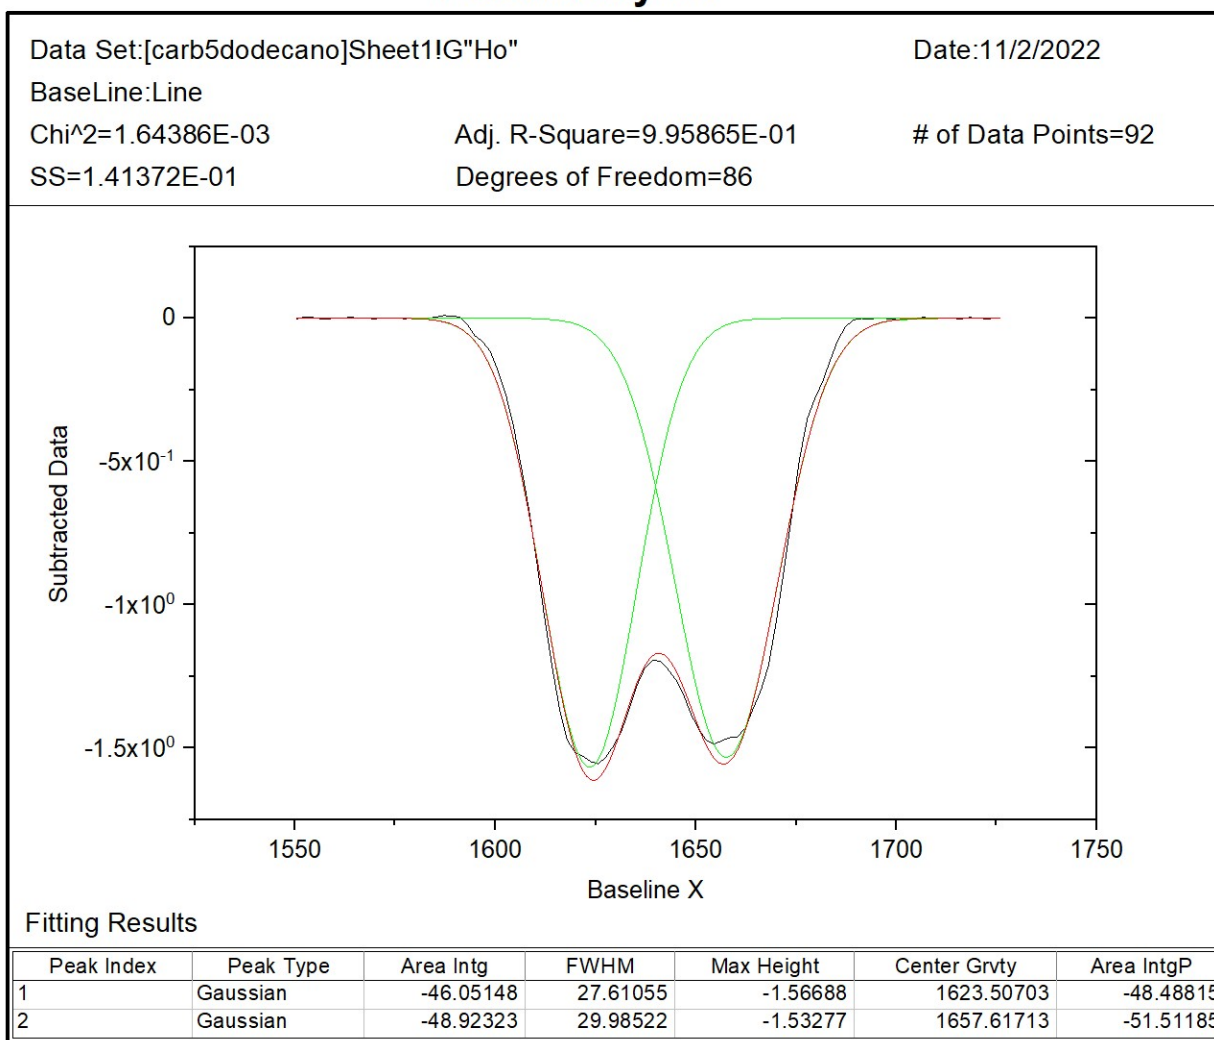

Figure S175. Peak analysis via OriginLab for 0.04 M TODGA with 5 vol% 1-dodecanol in n-dodecane after contact with 3 mM Ho(NO<sub>3</sub>)<sub>3</sub> in 1 M HNO<sub>3</sub>.

## Peak Analysis

Data Set:[carb5dodecano]Sheet1!D"Er"

Date:11/2/2022

BaseLine:Line

Chi^2=1.03273E-03

Adj. R-Square=9.98009E-01

# of Data Points=92

SS=8.88151E-02

Degrees of Freedom=86

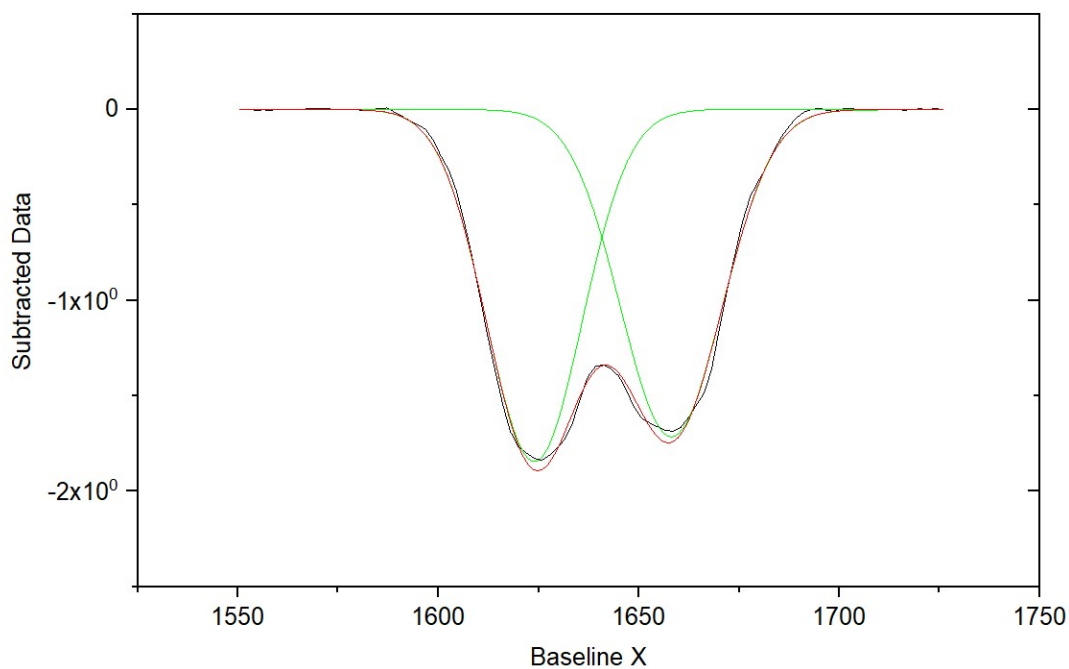

Fitting Results

| Peak Index | Peak Type | Area Intg | FWHM     | Max Height | Center Grvty | Area IntgP |
|------------|-----------|-----------|----------|------------|--------------|------------|
| 1          | Gaussian  | -54.83546 | 27.92849 | -1.84451   | 1623.94966   | -50.22854  |
| 2          | Gaussian  | -54.33647 | 29.77386 | -1.71445   | 1658.13431   | -49.77146  |

Figure S176. Peak analysis via OriginLab for 0.04 M TODGA with 5 vol% 1-dodecanol in n-dodecane after contact with 3 mM  $\text{Er}(\text{NO}_3)_3$  in 1 M  $\text{HNO}_3$ .

## Peak Analysis

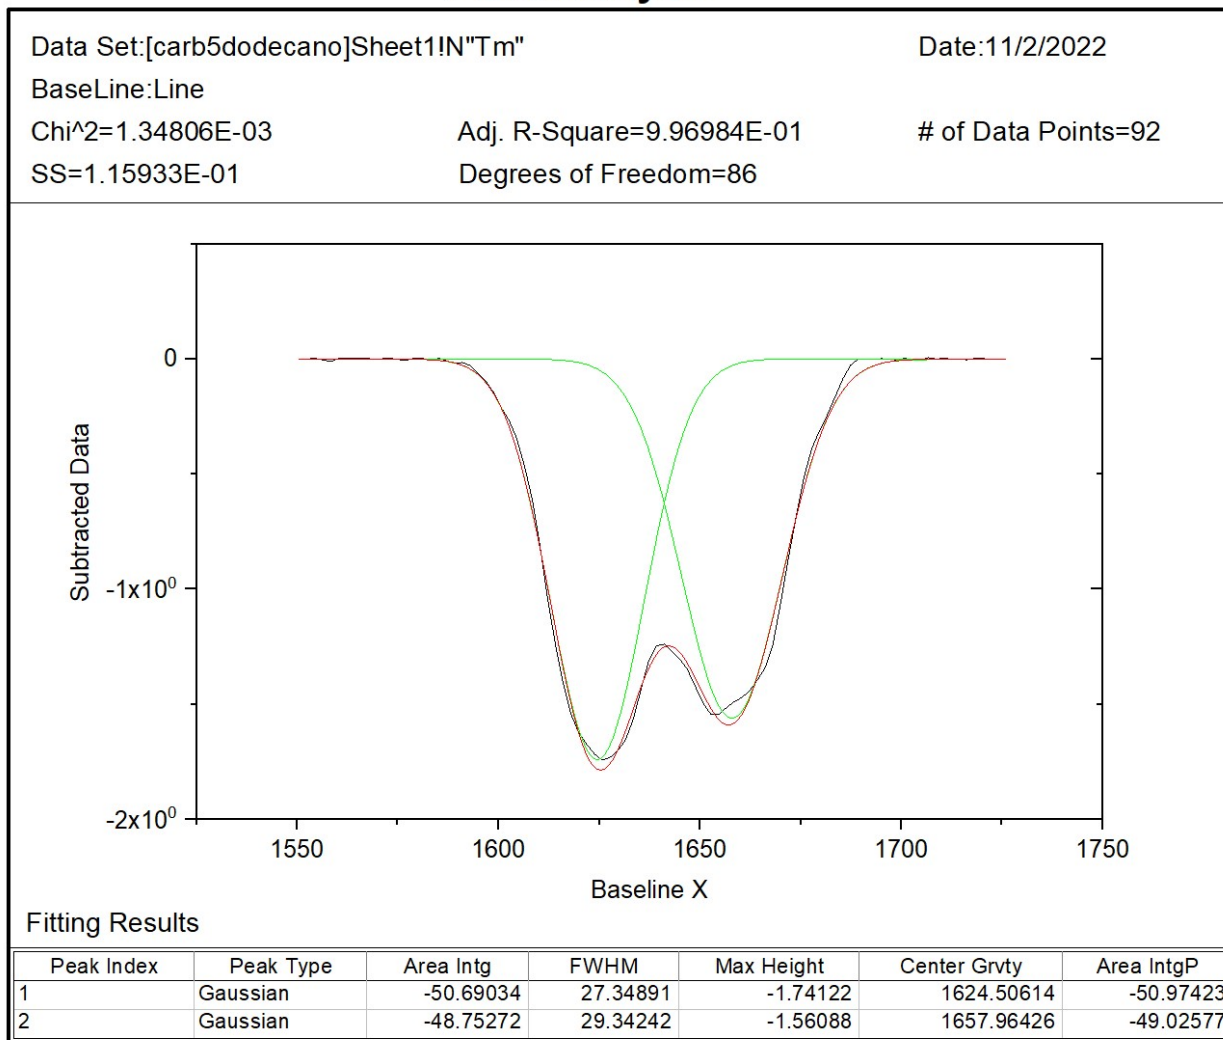

Figure S177. Peak analysis via OriginLab for 0.04 M TODGA with 5 vol% 1-dodecanol in n-dodecane after contact with 3 mM Tm(NO<sub>3</sub>)<sub>3</sub> in 1 M HNO<sub>3</sub>.



## Peak Analysis

Data Set:[carb5dodecano]Sheet1!O"Yb"

Date:11/2/2022

BaseLine:Line

Chi^2=1.30500E-03

Adj. R-Square=9.97151E-01

# of Data Points=92

SS=1.12230E-01

Degrees of Freedom=86

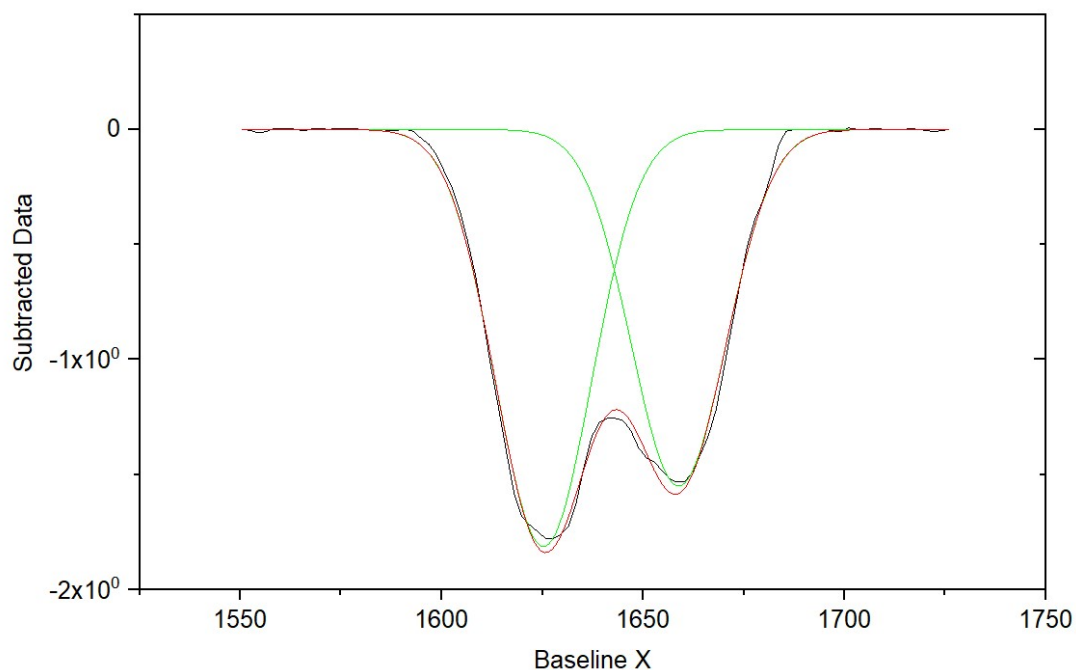

### Fitting Results

| Peak Index | Peak Type | Area Intg | FWHM     | Max Height | Center Grvty | Area IntgP |
|------------|-----------|-----------|----------|------------|--------------|------------|
| 1          | Gaussian  | -54.08576 | 28.01856 | -1.81345   | 1625.28242   | -54.33491  |
| 2          | Gaussian  | -45.4557  | 27.54311 | -1.5504    | 1658.82783   | -45.66509  |

Figure S178. Peak analysis via OriginLab for 0.04 M TODGA with 5 vol% 1-dodecanol in n-dodecane after contact with 3 mM Yb(NO<sub>3</sub>)<sub>3</sub> in 1 M HNO<sub>3</sub>.

## Peak Analysis

Data Set:[carb5dodecano]Sheet1!!"Lu"

Date:11/2/2022

BaseLine:Line

Chi^2=7.26155E-04

Adj. R-Square=9.98867E-01

# of Data Points=92

SS=6.24493E-02

Degrees of Freedom=86

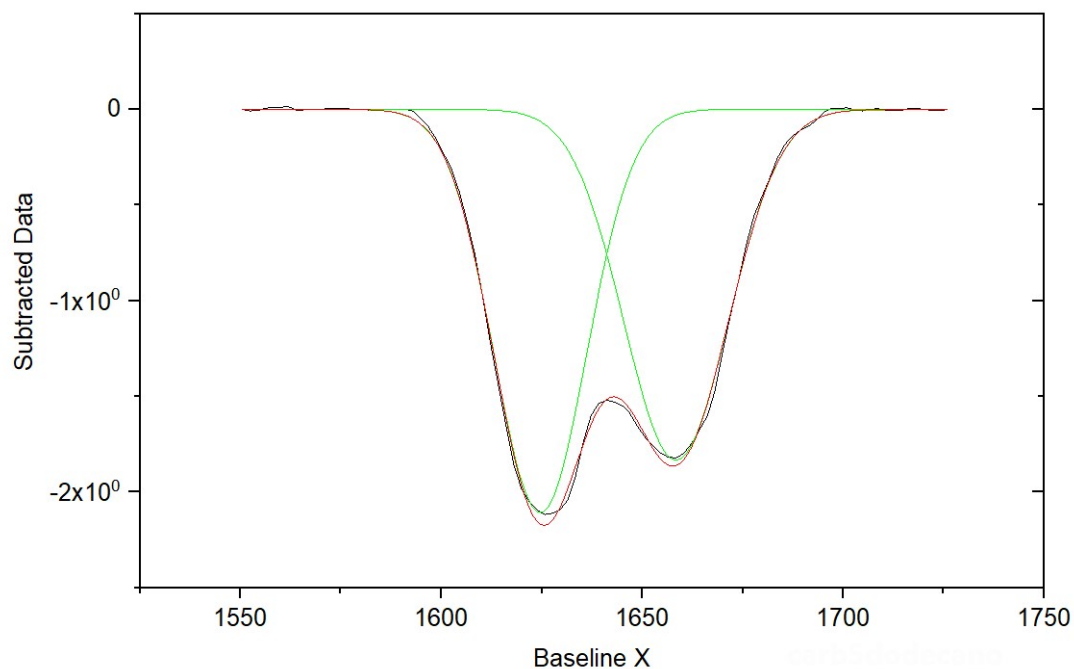

Fitting Results

| Peak Index | Peak Type | Area Intg | FWHM     | Max Height | Center Grvty | Area IntgP |
|------------|-----------|-----------|----------|------------|--------------|------------|
| 1          | Gaussian  | -61.04184 | 27.21921 | -2.10678   | 1624.63904   | -50.58116  |
| 2          | Gaussian  | -59.63914 | 30.57584 | -1.8324    | 1658.42856   | -49.41884  |

Figure S179. Peak analysis via OriginLab for 0.04 M TODGA with 5 vol% 1-dodecanol in n-dodecane after contact with 3 mM Lu(NO<sub>3</sub>)<sub>3</sub> in 1 M HNO<sub>3</sub>.
